# Supplementary material
Source: publisher site journal article supplement (https://www.dovepress.com/article/463450)
Supplement: Supplementary file 1 [file get_supplementary_file.php]

**Supplementary Table S1** Instrumental variables for the primary MR analysis

| Exposure   | SNP        | Chr | Pos       | Effect allele | Other allele | Beta    | Se     | Pval      | Eaf      | Samplesize | Author   | F statistics |
|------------|------------|-----|-----------|---------------|--------------|---------|--------|-----------|----------|------------|----------|--------------|
| ART4       | rs1001096  | 12  | 14988455  | A             | G            | 0.74    | 0.0217 | 1E-200    | 0.397358 | 3301       | Sun      | 1162.904288  |
| PSAPL1     | rs10023470 | 4   | 7434456   | G             | A            | 0.5481  | 0.0307 | 2.6E-71   | 0.184308 | 3301       | Sun      | 318.7446127  |
| CXCL11     | rs10031452 | 4   | 76924933  | C             | T            | -0.2328 | 0.0245 | 2.4E-21   | 0.528726 | 3301       | Sun      | 90.28877968  |
| SERPINA4   | rs10135681 | 14  | 95007744  | C             | T            | 0.2771  | 0.0422 | 8.416E-11 | 0.395186 | 997        | Suhre    | 43.0960851   |
| SERPINA4   | rs10139745 | 14  | 95035374  | A             | G            | 0.6166  | 0.0277 | 4.9E-110  | 0.221432 | 3301       | Sun      | 495.5043856  |
| DPT        | rs1018454  | 1   | 168697761 | C             | A            | 0.4155  | 0.0241 | 7.8E-67   | 0.585888 | 3301       | Sun      | 297.2404917  |
| SEMA3C     | rs1019016  | 7   | 80570562  | T             | G            | 0.1751  | 0.0248 | 1.6E-12   | 0.581376 | 3301       | Sun      | 49.85043249  |
| LRP8       | rs10218811 | 1   | 53805882  | A             | G            | 0.166   | 0.027  | 9.8E-10   | 0.725    | 3200       | Emilsson | 37.79972565  |
| CNTNAP2    | rs10274393 | 7   | 145378588 | C             | G            | -0.4332 | 0.0264 | 1.1E-60   | 0.711014 | 3301       | Sun      | 269.2582645  |
| CBR3       | rs1028997  | 21  | 37532222  | A             | G            | -0.764  | 0.0222 | 1E-200    | 0.375555 | 3301       | Sun      | 1184.351919  |
| C5         | rs1035029  | 9   | 123742818 | A             | G            | 0.182   | 0.025  | 2.1E-13   | 0.611    | 3200       | Emilsson | 52.9984      |
| EBI3       | rs10409421 | 19  | 4254752   | A             | G            | 1.049   | 0.019  | 1E-200    | 0.716    | 3200       | Emilsson | 3048.202216  |
| AOC1       | rs10452848 | 7   | 150523544 | A             | G            | -0.765  | 0.021  | 1E-200    | 0.498    | 3200       | Emilsson | 1327.040816  |
| ENPP5      | rs1047153  | 6   | 46128745  | T             | C            | -0.7891 | 0.0214 | 1E-200    | 0.646395 | 3301       | Sun      | 1359.67947   |
| VIT        | rs10490666 | 2   | 36932493  | T             | A            | 0.3471  | 0.0264 | 1.9E-39   | 0.304408 | 3301       | Sun      | 172.8627324  |
| UBASH3B    | rs10502249 | 11  | 122504251 | G             | T            | 0.187   | 0.027  | 1.1E-11   | 0.712    | 3200       | Emilsson | 47.96844993  |
| LIPN       | rs10509554 | 10  | 90525792  | T             | C            | 1.0165  | 0.0213 | 1E-200    | 0.306794 | 3301       | Sun      | 2277.485177  |
| PREP       | rs1051484  | 6   | 105726036 | C             | T            | -0.453  | 0.032  | 7E-44     | 0.835    | 3200       | Emilsson | 200.3994141  |
| DPP7       | rs10747049 | 9   | 140008750 | C             | G            | 0.3641  | 0.0277 | 2.3E-39   | 0.749544 | 3301       | Sun      | 172.7753652  |
| VSIR       | rs10762477 | 10  | 73531069  | G             | A            | 0.2705  | 0.0352 | 1.7E-14   | 0.14794  | 3301       | Sun      | 59.05398534  |
| UROS       | rs10794029 | 10  | 127561568 | G             | A            | -0.2329 | 0.0311 | 7.6E-14   | 0.794492 | 3301       | Sun      | 56.08131636  |
| ADAM12     | rs10794057 | 10  | 127729734 | T             | C            | -0.209  | 0.025  | 1.2E-16   | 0.398    | 3200       | Emilsson | 69.8896      |
| SPON1      | rs10832169 | 11  | 14066486  | A             | G            | 0.3748  | 0.0239 | 1.3E-55   | 0.490547 | 3301       | Sun      | 245.9253865  |
| PTHLH      | rs10843115 | 12  | 28307717  | T             | C            | 0.1862  | 0.0276 | 1.4E-11   | 0.271368 | 3301       | Sun      | 45.51360008  |
| CBLN1      | rs10852587 | 16  | 49006458  | A             | T            | -1.0805 | 0.0327 | 1E-200    | 0.143622 | 3301       | Sun      | 1091.827521  |
| QSOX2      | rs10858248 | 9   | 139108324 | G             | A            | -0.3568 | 0.0239 | 1.5E-50   | 0.502175 | 3301       | Sun      | 222.8711682  |
| GFRA1      | rs10885877 | 10  | 117966090 | G             | C            | 0.2645  | 0.0272 | 2E-22     | 0.295454 | 3301       | Sun      | 94.56132407  |
| FAM213A    | rs10887868 | 10  | 82194264  | A             | G            | -0.1879 | 0.025  | 5.5E-14   | 0.412045 | 3301       | Sun      | 56.490256    |
| CAPN1;CAPN | rs10895987 | 11  | 64904908  | T             | C            | -0.4591 | 0.0509 | 1.007E-18 | 0.225628 | 995        | Suhre    | 81.25492002  |
| FCGR3B     | rs10919543 | 1   | 161508617 | G             | A            | 0.4353  | 0.0251 | 3.2E-67   | 0.324432 | 3301       | Sun      | 300.7667974  |
| FKBP7      | rs10930831 | 2   | 179303976 | G             | C            | -0.365  | 0.027  | 2E-39     | 0.768    | 3200       | Emilsson | 182.7503429  |
| FAM171B    | rs10931256 | 2   | 187685195 | C             | T            | -0.3336 | 0.0295 | 1.1E-29   | 0.216165 | 3301       | Sun      | 127.8815972  |
| ALPG       | rs10933394 | 2   | 233249080 | T             | C            | -0.192  | 0.026  | 1E-13     | 0.642    | 3200       | Emilsson | 54.53254438  |

|          |             |    |           |   |   |         |          |           |          |                |             |
|----------|-------------|----|-----------|---|---|---------|----------|-----------|----------|----------------|-------------|
| GGH      | rs10957266  | 8  | 63923764  | C | T | 0.7985  | 0.0456   | 1.2E-68   | 0.071297 | 3301 Sun       | 306.6338922 |
| KIAA1161 | rs10972076  | 9  | 34356359  | T | C | 0.3082  | 0.0252   | 2.2E-34   | 0.624659 | 3301 Sun       | 149.5767826 |
| CNTFR    | rs10972159  | 9  | 34593086  | A | G | -0.6996 | 0.0941   | 1E-13     | 0.017903 | 3301 Sun       | 55.27393134 |
| GPX7     | rs1097234   | 1  | 53063559  | A | C | 0.5633  | 0.0311   | 1.6E-73   | 0.174745 | 3301 Sun       | 328.0641122 |
| DKK3     | rs11022114  | 11 | 12038874  | A | G | 0.3364  | 0.0269   | 6.5E-36   | 0.327961 | 3301 Sun       | 156.3894363 |
| CLEC4C   | rs11055602  | 12 | 7904111   | T | G | -0.95   | 0.019    | 1E-200    | 0.567    | 3200 Emilsson  | 2500        |
| TMEM132C | rs11059617  | 12 | 128757909 | T | A | -0.225  | 0.0257   | 2.2E-18   | 0.335066 | 3301 Sun       | 76.64764039 |
| SIGLEC14 | rs1106476   | 19 | 52130637  | A | T | -1.1918 | 0.0317   | 1E-200    | 0.116912 | 3301 Sun       | 1413.475346 |
| FCN1     | rs11103602  | 9  | 137854872 | A | G | 0.5827  | 0.0266   | 1.5E-106  | 0.258023 | 3301 Sun       | 479.8734948 |
| OLFM1    | rs11103667  | 9  | 137978360 | C | T | -0.193  | 0.032    | 2.6E-09   | 0.815    | 3200 Emilsson  | 36.37597656 |
| C4BPA    | rs11120218  | 1  | 207278451 | G | A | -0.429  | 0.038    | 1.5E-28   | 0.889    | 3200 Emilsson  | 127.4522161 |
| REG1A    | rs11126696  | 2  | 79323888  | G | A | 0.265   | 0.021    | 2.18E-40  | 0.612    | 6861 Yao       | 159.2403628 |
| CTSD     | rs111693235 | 11 | 1770224   | C | G | 0.35    | 0.0329   | 2E-26     | 0.71     | 3394 Folkersen | 113.150544  |
| LRIG3    | rs11172791  | 12 | 59272973  | C | T | -0.4624 | 0.0613   | 4.8E-14   | 0.04525  | 3301 Sun       | 56.90031908 |
| ENTPD1   | rs11188501  | 10 | 97600919  | A | G | 0.2147  | 0.0262   | 2.2E-16   | 0.339852 | 3301 Sun       | 67.15239497 |
| FAM151A  | rs11206397  | 1  | 55097068  | T | A | 0.2651  | 0.0261   | 2.6E-24   | 0.326689 | 3301 Sun       | 103.1664391 |
| PTGR1    | rs112140014 | 9  | 114325849 | G | C | -0.726  | 0.055    | 2.1E-38   | 0.952    | 3200 Emilsson  | 174.24      |
| NCAM1    | rs11214489  | 11 | 112975934 | C | T | 0.368   | 0.024    | 3.01E-54  | 0.818    | 6861 Yao       | 235.1111111 |
| MCAM     | rs11217234  | 11 | 119177938 | A | G | -0.144  | 0.026    | 4.32E-08  | 0.718    | 6861 Yao       | 30.67455621 |
| TMEM132A | rs11230521  | 11 | 60698732  | A | G | 0.6176  | 0.0274   | 2E-112    | 0.231444 | 3301 Sun       | 508.058181  |
| WFIKKN1  | rs11248941  | 16 | 658271    | G | T | -0.203  | 0.028    | 2.3E-13   | 0.732    | 3200 Emilsson  | 52.5625     |
| CCL16    | rs112689088 | 17 | 34307457  | C | T | -1.5245 | 0.0336   | 1E-200    | 0.097531 | 3301 Sun       | 2058.620545 |
| ASPH     | rs112760834 | 8  | 62540134  | T | G | -0.5784 | 0.0688   | 4.1E-17   | 0.033209 | 3301 Sun       | 70.67725798 |
| SEMA4C   | rs112826173 | 2  | 97489654  | A | G | 0.713   | 0.09     | 4E-15     | 0.981    | 3200 Emilsson  | 62.76160494 |
| SFTPB    | rs1130866   | 2  | 85893741  | A | G | -0.686  | 0.022    | 3.5E-189  | 0.466    | 3200 Emilsson  | 972.3057851 |
| B4GALT6  | rs113222817 | 18 | 29216314  | T | G | 1.143   | 0.063    | 8.1E-71   | 0.965    | 3200 Emilsson  | 329.1632653 |
| LYVE1    | rs114527818 | 11 | 10619041  | T | A | -0.369  | 0.055    | 3.3E-11   | 0.951    | 3200 Emilsson  | 45.01190083 |
| FSTL1    | rs1147707   | 3  | 120169248 | T | C | -0.2113 | 0.0255   | 1.1E-16   | 0.389098 | 3301 Sun       | 68.66234525 |
| TREM2    | rs114812713 | 6  | 41034000  | G | C | 0.36    | 0.057    | 3.1E-10   | 0.955    | 3200 Emilsson  | 39.88919668 |
| NMRAL1   | rs11557236  | 16 | 4519439   | A | G | -0.4905 | 0.0443   | 1.5E-28   | 0.082096 | 3301 Sun       | 122.5943826 |
| CKM      | rs11559024  | 19 | 45821183  | C | T | -0.6788 | 0.0844   | 9.1E-16   | 0.021509 | 3301 Sun       | 64.68428382 |
| PLXNC1   | rs115651556 | 12 | 94613898  | A | G | -2.1447 | 0.1008   | 2.1E-100  | 0.013723 | 3301 Sun       | 452.7016103 |
| NTNG1    | rs115668827 | 1  | 107678268 | C | G | 1.0036  | 0.0565   | 1.1E-70   | 0.048772 | 3301 Sun       | 315.5181956 |
| MMP7     | rs11568819  | 11 | 102401633 | A | G | 0.6681  | 0.087649 | 5.837E-14 | 0.066901 | 994 Suhre      | 58.10157729 |
| PLA2G2A  | rs11573156  | 1  | 20306146  | C | G | 1.0205  | 0.0243   | 1E-200    | 0.231634 | 3301 Sun       | 1763.654338 |

|          |             |    |           |   |   |         |          |           |          |      |          |             |
|----------|-------------|----|-----------|---|---|---------|----------|-----------|----------|------|----------|-------------|
| IL6ST    | rs11574765  | 5  | 55278967  | G | A | 0.3809  | 0.0388   | 1E-22     | 0.115654 | 3301 | Sun      | 96.37369141 |
| IL11RA   | rs11575578  | 9  | 34656479  | A | G | 0.5065  | 0.0479   | 4.4E-26   | 0.068486 | 3301 | Sun      | 111.8118601 |
| CD55     | rs11580387  | 1  | 207418408 | G | A | -0.5211 | 0.0279   | 4.7E-78   | 0.233948 | 3301 | Sun      | 348.8459938 |
| SLAMF7   | rs11581248  | 1  | 160720074 | T | C | -1.2597 | 0.0295   | 1E-200    | 0.142448 | 3301 | Sun      | 1823.434749 |
| IL23R    | rs11581607  | 1  | 67707690  | A | G | -0.42   | 0.0491   | 1.2E-17   | 0.066948 | 3301 | Sun      | 73.1704282  |
| FCRL4    | rs11582663  | 1  | 157559122 | T | C | -1.1329 | 0.0295   | 1E-200    | 0.144281 | 3301 | Sun      | 1474.82035  |
| KIAA2013 | rs11588551  | 1  | 11941936  | T | C | 0.178   | 0.025    | 2E-12     | 0.418    | 3200 | Emilsson | 50.6944     |
| GSTM3    | rs115929572 | 1  | 110246053 | G | A | -0.249  | 0.031618 | 3.4E-15   | 0.935    | 3200 | Emilsson | 62.01992276 |
| VWA2     | rs11595697  | 10 | 115905775 | C | T | -0.431  | 0.042    | 7.8E-25   | 0.903    | 3200 | Emilsson | 105.3066893 |
| RNASE6   | rs11622942  | 14 | 21250846  | T | G | 0.9971  | 0.0236   | 1E-200    | 0.233384 | 3301 | Sun      | 1785.0625   |
| CD7      | rs116473040 | 17 | 80291652  | A | G | 0.962   | 0.057    | 1.3E-61   | 0.955    | 3200 | Emilsson | 284.839643  |
| HSP90B1  | rs1165693   | 12 | 104340204 | A | G | 1.0974  | 0.0182   | 1E-200    | 0.321367 | 3301 | Sun      | 3635.692428 |
| SERPINF2 | rs11657394  | 17 | 1636950   | A | C | -0.3459 | 0.0479   | 5.4E-13   | 0.077401 | 3301 | Sun      | 52.14709228 |
| MATN4    | rs11697677  | 20 | 43925554  | G | A | -0.2298 | 0.028    | 2.5E-16   | 0.253541 | 3301 | Sun      | 67.35719388 |
| ORM1     | rs116994374 | 9  | 117084672 | G | A | -0.409  | 0.054    | 2.55E-14  | 0.94     | 6861 | Yao      | 57.36659808 |
| HPSE     | rs11732810  | 4  | 84230878  | G | T | 0.541   | 0.028    | 7.7E-78   | 0.773    | 3200 | Emilsson | 373.317602  |
| DUT      | rs117540572 | 15 | 48670241  | G | A | -0.339  | 0.05     | 2.1E-11   | 0.939    | 3200 | Emilsson | 45.9684     |
| OAF      | rs117554512 | 11 | 120098329 | T | C | 0.6816  | 0.0431   | 2.1E-56   | 0.086262 | 3301 | Sun      | 250.0947777 |
| GLCE     | rs11854180  | 15 | 69559340  | T | G | 0.8286  | 0.0248   | 1E-200    | 0.769146 | 3301 | Sun      | 1116.314321 |
| FLRT3    | rs11908097  | 20 | 14689146  | C | T | 0.4444  | 0.0278   | 2.5E-57   | 0.25127  | 3301 | Sun      | 255.5397754 |
| SPINK2   | rs11941335  | 4  | 57689460  | T | C | 0.9996  | 0.083    | 2.2E-33   | 0.021062 | 3301 | Sun      | 145.0428451 |
| DKK1     | rs1194673   | 10 | 54141652  | A | G | 0.1824  | 0.0261   | 2.8E-12   | 0.632462 | 3301 | Sun      | 48.83921258 |
| IL7R     | rs11957503  | 5  | 35883176  | G | T | 0.4248  | 0.043644 | 1.922E-21 | 0.437249 | 996  | Suhre    | 94.73571832 |
| HGFAC    | rs1203119   | 4  | 3406952   | A | G | -0.9854 | 0.075924 | 1.095E-35 | 0.082412 | 995  | Suhre    | 168.4480701 |
| IFNLR1   | rs12046369  | 1  | 24526135  | G | T | 0.244   | 0.035    | 3.3E-12   | 0.853    | 3200 | Emilsson | 48.60081633 |
| PPIE     | rs12086750  | 1  | 40210468  | C | G | -0.3832 | 0.025    | 4.8E-53   | 0.370624 | 3301 | Sun      | 234.947584  |
| GALNT16  | rs12100668  | 14 | 69793475  | G | A | -0.194  | 0.025    | 4.4E-15   | 0.408    | 3200 | Emilsson | 60.2176     |
| CD48     | rs12124234  | 1  | 160675269 | C | G | 0.2639  | 0.0252   | 1.1E-25   | 0.405154 | 3301 | Sun      | 109.6674383 |
| PEAR1    | rs12137505  | 1  | 156883546 | G | A | -0.2226 | 0.0251   | 8.1E-19   | 0.406496 | 3301 | Sun      | 78.65075158 |
| GNLY     | rs12151621  | 2  | 85934499  | A | C | 0.7736  | 0.0264   | 7.4E-189  | 0.227041 | 3301 | Sun      | 858.6675849 |
| METTL24  | rs12189608  | 6  | 110573292 | A | T | 0.378   | 0.061    | 7.4E-10   | 0.956    | 3200 | Emilsson | 38.39935501 |
| PPIL1    | rs12194408  | 6  | 36839598  | G | C | -1.106  | 0.0705   | 1.9E-55   | 0.030241 | 3301 | Sun      | 246.1115638 |
| GLO1     | rs12209477  | 6  | 38669799  | C | G | 0.168   | 0.026    | 7.1E-11   | 0.66     | 3200 | Emilsson | 41.75147929 |
| QSOX1    | rs12371     | 1  | 180163390 | G | A | 0.6995  | 0.0426   | 1.3E-60   | 0.089018 | 3301 | Sun      | 269.6225672 |
| SPOCK2   | rs1245540   | 10 | 73849752  | T | C | 0.2179  | 0.0243   | 3.3E-19   | 0.44884  | 3301 | Sun      | 80.40849125 |

|               |             |    |           |   |   |         |          |           |          |                |             |
|---------------|-------------|----|-----------|---|---|---------|----------|-----------|----------|----------------|-------------|
| CD33          | rs12459419  | 19 | 51728477  | T | C | -0.9436 | 0.0209   | 1E-200    | 0.329168 | 3301 Sun       | 2038.371283 |
| IGFLR1        | rs12459634  | 19 | 36230174  | C | T | -0.7007 | 0.033    | 5.8E-100  | 0.144789 | 3301 Sun       | 450.8544444 |
| ALPP          | rs12478529  | 2  | 233286654 | C | T | -0.354  | 0.028    | 2.5E-35   | 0.778    | 3200 Emilsson  | 159.8418367 |
| CPNE1         | rs12481228  | 20 | 34218673  | C | G | -0.977  | 0.0379   | 1.8E-146  | 0.097658 | 3301 Sun       | 664.5240565 |
| FN1           | rs1250258   | 2  | 216300185 | C | T | -0.7113 | 0.04539  | 1.282E-49 | 0.254518 | 996 Suhre      | 245.5783267 |
| ERO1B         | rs1254194   | 1  | 236399442 | T | G | -0.3822 | 0.0241   | 1.9E-56   | 0.595759 | 3301 Sun       | 251.5053804 |
| IL12RB2       | rs12566098  | 1  | 67889571  | G | C | 0.2568  | 0.0267   | 6E-22     | 0.688055 | 3301 Sun       | 92.50549173 |
| RNASE4        | rs12588573  | 14 | 21146584  | T | C | -0.4494 | 0.0291   | 8.9E-54   | 0.224438 | 3301 Sun       | 238.495483  |
| NAGPA         | rs12599777  | 16 | 5079466   | G | A | -0.4178 | 0.0317   | 1.4E-39   | 0.204198 | 3301 Sun       | 173.7074108 |
| CNP           | rs12602950  | 17 | 40123829  | A | G | 0.187   | 0.027    | 3.8E-12   | 0.704    | 3200 Emilsson  | 47.96844993 |
| NPTXR         | rs12628473  | 22 | 39240717  | A | G | -1.013  | 0.107    | 4.6E-21   | 0.987    | 3200 Emilsson  | 89.62957464 |
| KIAA1549L     | rs12792396  | 11 | 33417110  | G | A | 0.439   | 0.025    | 7.1E-68   | 0.381    | 3200 Emilsson  | 308.3536    |
| DLK1          | rs12881760  | 14 | 101176335 | C | G | 0.5356  | 0.0251   | 3.5E-101  | 0.676353 | 3301 Sun       | 455.3377883 |
| AP1G2         | rs12897422  | 14 | 24033027  | G | A | 0.268   | 0.035    | 1.3E-14   | 0.858    | 3200 Emilsson  | 58.63183673 |
| MAN1A2        | rs1289863   | 1  | 117854689 | C | T | 0.21    | 0.026    | 1.5E-15   | 0.692    | 3200 Emilsson  | 65.23668639 |
| NEO1          | rs12903656  | 15 | 73326961  | C | G | 0.2861  | 0.0415   | 5.5E-12   | 0.10075  | 3301 Sun       | 47.52690376 |
| NMB           | rs12912342  | 15 | 85248216  | T | C | 0.164   | 0.025    | 7.6E-11   | 0.661    | 3200 Emilsson  | 43.0336     |
| TNFSF12;TNFR1 | rs12941509  | 17 | 7448288   | G | C | 0.3933  | 0.0266   | 2.2E-49   | 0.279301 | 3301 Sun       | 218.6173469 |
| FCER2         | rs12973524  | 19 | 7758263   | A | G | -0.3062 | 0.0245   | 5.8E-36   | 0.484028 | 3301 Sun       | 156.1989838 |
| LILRB5        | rs12975366  | 19 | 54759361  | C | T | -1.1607 | 0.0152   | 1E-200    | 0.405252 | 3301 Sun       | 5831.13093  |
| GKN2          | rs13008230  | 2  | 69154583  | T | G | 0.942   | 0.076    | 2.7E-34   | 0.973    | 3200 Emilsson  | 153.6295014 |
| QPCT          | rs13027919  | 2  | 37567636  | C | T | 0.271   | 0.024    | 3.5E-28   | 0.538    | 3200 Emilsson  | 127.5017361 |
| BTD           | rs13100619  | 3  | 15549967  | A | C | 1.431   | 0.058    | 4.4E-122  | 0.962    | 3200 Emilsson  | 608.7280024 |
| TGFBI         | rs13159365  | 5  | 135389433 | T | C | -0.4461 | 0.0239   | 5E-78     | 0.507136 | 3301 Sun       | 348.3923776 |
| TYMP          | rs131798    | 22 | 50971509  | G | T | 0.204   | 0.03     | 1.8E-11   | 0.773    | 3200 Emilsson  | 46.24       |
| HSPB1         | rs13236526  | 7  | 75913642  | A | G | 0.36    | 0.042042 | 1.1E-17   | 0.7      | 3394 Folkersen | 73.32437828 |
| CPB1          | rs13318853  | 3  | 148562399 | A | G | 0.2563  | 0.0293   | 2E-18     | 0.23152  | 3301 Sun       | 76.51771133 |
| SCG3          | rs1378892   | 15 | 51964865  | C | T | 0.486   | 0.0277   | 1E-68     | 0.763554 | 3301 Sun       | 307.8314588 |
| CLEC11A       | rs13866     | 19 | 51228746  | C | T | 0.154   | 0.026    | 4E-09     | 0.691    | 3200 Emilsson  | 35.08284024 |
| IGLL1         | rs139571703 | 22 | 23915620  | T | C | -0.7264 | 0.0693   | 9.8E-26   | 0.037383 | 3301 Sun       | 109.8715375 |
| SIGLEC7       | rs140185670 | 19 | 51646140  | C | G | -0.6089 | 0.0482   | 1.7E-36   | 0.07999  | 3301 Sun       | 159.5871326 |
| ROR1          | rs1408416   | 1  | 64614495  | T | G | -0.44   | 0.033    | 1.8E-40   | 0.161988 | 3301 Sun       | 177.7777778 |
| BPIFA2        | rs141715080 | 20 | 31742114  | C | T | 0.429   | 0.076    | 2E-08     | 0.973    | 3200 Emilsson  | 31.86305402 |
| IL18R1        | rs1420106   | 2  | 103035044 | G | A | -0.9085 | 0.0257   | 1E-200    | 0.775551 | 3301 Sun       | 1249.636255 |
| ADIPOQ        | rs143257534 | 3  | 186551888 | C | T | 0.425   | 0.072    | 3.3E-09   | 0.974    | 3200 Emilsson  | 34.84278549 |

|             |             |    |           |   |   |         |          |           |          |                |             |
|-------------|-------------|----|-----------|---|---|---------|----------|-----------|----------|----------------|-------------|
| SPINK6      | rs1432688   | 5  | 147603178 | G | A | 1.0579  | 0.0428   | 7.6E-135  | 0.924477 | 3301 Sun       | 610.9444111 |
| RECQL       | rs144436375 | 12 | 21515500  | A | C | -0.935  | 0.086    | 9E-27     | 0.98     | 3200 Emilsson  | 118.2024067 |
| ADH5        | rs1453873   | 4  | 100022571 | C | T | -0.284  | 0.027    | 2.5E-25   | 0.742    | 3200 Emilsson  | 110.6392318 |
| CPQ         | rs145746079 | 8  | 97832518  | T | C | 1.192   | 0.073    | 7.1E-58   | 0.972    | 3200 Emilsson  | 266.6286358 |
| CNTN5       | rs1461672   | 11 | 99175378  | T | C | 0.734   | 0.082306 | 2.241E-18 | 0.061307 | 995 Suhre      | 79.52884876 |
| SPARCL1     | rs1462372   | 4  | 88478750  | C | T | 0.3214  | 0.0462   | 6.309E-12 | 0.327482 | 997 Suhre      | 48.39637909 |
| MRC2        | rs146385050 | 17 | 60637258  | A | C | -0.2188 | 0.0323   | 1.3E-11   | 0.195049 | 3301 Sun       | 45.88699211 |
| GP5         | rs1466733   | 3  | 194120998 | A | G | 0.171   | 0.021    | 8.6E-17   | 0.737    | 6861 Yao       | 66.30612245 |
| FTCD        | rs149024257 | 21 | 47686213  | G | A | -0.287  | 0.051    | 1.9E-08   | 0.938    | 3200 Emilsson  | 31.66820454 |
| CSF2RB      | rs1534881   | 22 | 37329448  | A | G | -0.3158 | 0.0244   | 2.6E-38   | 0.445804 | 3301 Sun       | 167.5114888 |
| MANF        | rs1552074   | 3  | 51408051  | T | C | 0.391   | 0.035    | 2.6E-28   | 0.859    | 3200 Emilsson  | 124.8008163 |
| RGMB        | rs1563317   | 5  | 97768486  | G | A | 0.2161  | 0.0245   | 1.2E-18   | 0.552752 | 3301 Sun       | 77.79960017 |
| GFRA2       | rs15881     | 8  | 21550768  | C | A | 0.2954  | 0.0246   | 4.1E-33   | 0.455607 | 3301 Sun       | 144.195188  |
| CNTN4       | rs163352    | 3  | 3098041   | C | G | -0.3249 | 0.0319   | 2.7E-24   | 0.81339  | 3301 Sun       | 103.7332672 |
| C3          | rs163494    | 19 | 6724340   | C | T | 0.264   | 0.031    | 3.4E-17   | 0.805    | 3200 Emilsson  | 72.52445369 |
| ATP1B2      | rs1642762   | 17 | 7554772   | T | C | -0.2881 | 0.0255   | 1.5E-29   | 0.586879 | 3301 Sun       | 127.6456901 |
| GP6         | rs1654439   | 19 | 55553647  | T | G | -0.6565 | 0.054876 | 6.59E-31  | 0.170181 | 996 Suhre      | 143.1232746 |
| NRP2        | rs16837641  | 2  | 206634869 | A | G | 0.2094  | 0.0271   | 1.1E-14   | 0.321865 | 3301 Sun       | 59.70555956 |
| CXCL6       | rs16850073  | 4  | 74703999  | T | C | 0.8877  | 0.03764  | 9.66E-98  | 0.376524 | 984 Suhre      | 556.1889605 |
| ANGPTL1     | rs16853043  | 1  | 178545926 | G | A | 0.4305  | 0.0247   | 5.4E-68   | 0.352388 | 3301 Sun       | 303.7752627 |
| PDCD1LG2    | rs16923189  | 9  | 5510644   | G | A | 0.3879  | 0.0259   | 7.9E-51   | 0.297639 | 3301 Sun       | 224.305556  |
| CTSB        | rs1692819   | 8  | 11705448  | A | G | 0.4246  | 0.0274   | 5.2E-54   | 0.291825 | 3301 Sun       | 240.1368746 |
| GZMM        | rs16989724  | 19 | 531115    | T | C | 0.4303  | 0.0529   | 3.9E-16   | 0.935134 | 3301 Sun       | 66.16546182 |
| PI3         | rs16989763  | 20 | 43779963  | C | T | 0.3756  | 0.0302   | 1.6E-35   | 0.195049 | 3301 Sun       | 154.6811105 |
| AMY2B       | rs17014913  | 1  | 104105635 | A | G | 0.433   | 0.034    | 3.2E-36   | 0.839    | 3200 Emilsson  | 162.1877163 |
| SERPINA11   | rs17090881  | 14 | 94913209  | C | A | 0.288   | 0.031    | 1.8E-20   | 0.835    | 3200 Emilsson  | 86.31009365 |
| ANG         | rs17114671  | 14 | 21155270  | C | T | 0.8064  | 0.059567 | 1.918E-38 | 0.118857 | 997 Suhre      | 183.2701028 |
| IGFBP7      | rs1718849   | 4  | 57942323  | C | T | -0.3626 | 0.0281   | 5.2E-38   | 0.766286 | 3301 Sun       | 166.5110118 |
| RNASE1      | rs17254387  | 14 | 21280678  | A | G | 0.2302  | 0.0273   | 3E-17     | 0.687505 | 3301 Sun       | 71.10257752 |
| PPP3CA;PPP3 | rs17266357  | 4  | 102721809 | C | T | 0.3681  | 0.045005 | 8.67E-16  | 0.30993  | 997 Suhre      | 66.89851412 |
| NTN4        | rs17288108  | 12 | 96131895  | G | A | -0.2779 | 0.0323   | 7.2E-18   | 0.181915 | 3301 Sun       | 74.02391473 |
| SEMA5A      | rs17329170  | 5  | 9547242   | A | G | 1.432   | 0.0324   | 1E-200    | 0.100634 | 3301 Sun       | 1953.421734 |
| ADH7        | rs17529509  | 4  | 100351436 | C | A | 0.401   | 0.048    | 8E-17     | 0.927    | 3200 Emilsson  | 69.79210069 |
| SPOCK3      | rs17599599  | 4  | 167961738 | A | G | 0.8477  | 0.0765   | 1.5E-28   | 0.028272 | 3301 Sun       | 122.7895749 |
| CSF1        | rs17610659  | 1  | 110503296 | T | C | 0.15    | 0.02428  | 6.5E-10   | 0.48     | 3394 Folkersen | 38.16523862 |

|         |            |    |           |   |   |         |          |           |          |      |          |             |
|---------|------------|----|-----------|---|---|---------|----------|-----------|----------|------|----------|-------------|
| LSAMP   | rs17646258 | 3  | 116038249 | C | T | 0.222   | 0.031    | 1.5E-12   | 0.829    | 3200 | Emilsson | 51.28407908 |
| CA13    | rs17741049 | 8  | 86198253  | T | C | -0.7441 | 0.079916 | 7.915E-20 | 0.068205 | 997  | Suhre    | 86.6954112  |
| FLRT2   | rs17796777 | 14 | 85806774  | C | A | -0.2353 | 0.0276   | 1.5E-17   | 0.285507 | 3301 | Sun      | 72.68180267 |
| CNDP1   | rs17817077 | 18 | 72209543  | A | G | 0.35    | 0.04398  | 4.72E-15  | 0.405528 | 995  | Suhre    | 63.33313279 |
| QPCTL   | rs17850756 | 19 | 46206262  | A | G | -0.2881 | 0.026    | 1.6E-28   | 0.327901 | 3301 | Sun      | 122.7834467 |
| DSC2    | rs1789063  | 18 | 28673913  | A | T | -0.2159 | 0.0293   | 1.8E-13   | 0.768825 | 3301 | Sun      | 54.29627602 |
| CTSF    | rs1791679  | 11 | 66337874  | A | C | 0.2349  | 0.0269   | 2.5E-18   | 0.289477 | 3301 | Sun      | 76.25379693 |
| TGFB1   | rs1800470  | 19 | 41858921  | A | G | 0.259   | 0.024    | 4.5E-26   | 0.621    | 3200 | Emilsson | 116.4600694 |
| ADH4    | rs1800759  | 4  | 100065509 | G | T | 0.157   | 0.025    | 4.1E-10   | 0.622    | 3200 | Emilsson | 39.4384     |
| CNTN1   | rs1838343  | 12 | 41196230  | C | T | 0.207   | 0.021    | 6.45E-24  | 0.58     | 6861 | Yao      | 97.16326531 |
| ISG15   | rs1891906  | 1  | 950243    | C | A | 0.2592  | 0.0253   | 1.4E-24   | 0.385856 | 3301 | Sun      | 104.9612398 |
| CPM     | rs1908671  | 12 | 69433404  | C | G | -0.1859 | 0.0272   | 8.1E-12   | 0.292111 | 3301 | Sun      | 46.71119431 |
| ADAM23  | rs1921673  | 2  | 207324282 | G | A | 0.4321  | 0.0255   | 3.2E-64   | 0.6846   | 3301 | Sun      | 287.1363476 |
| PCDH9   | rs1927820  | 13 | 67774646  | G | C | -0.266  | 0.033    | 2.2E-15   | 0.846    | 3200 | Emilsson | 64.97337006 |
| SMOC1   | rs1958078  | 14 | 70354858  | C | A | 0.3765  | 0.0328   | 1.8E-30   | 0.833946 | 3301 | Sun      | 131.7596018 |
| MFGE8   | rs1961839  | 15 | 89467454  | A | G | -0.2253 | 0.0252   | 3.4E-19   | 0.397423 | 3301 | Sun      | 79.93211451 |
| HPGDS   | rs1965049  | 4  | 95266204  | G | A | 0.4396  | 0.0246   | 1.3E-71   | 0.620956 | 3301 | Sun      | 319.3339943 |
| NPPB    | rs198379   | 1  | 11915467  | T | C | -0.266  | 0.024    | 1.58E-41  | 0.608    | 6861 | Yao      | 122.8402778 |
| CCL3L1  | rs2015086  | 17 | 34391617  | G | A | 0.496   | 0.0364   | 3.1E-42   | 0.131452 | 3301 | Sun      | 185.6780582 |
| SEMA3G  | rs2016575  | 3  | 52477080  | C | T | -0.2687 | 0.0316   | 1.9E-17   | 0.815652 | 3301 | Sun      | 72.30380748 |
| SPINK5  | rs2052536  | 5  | 147504557 | T | G | -0.152  | 0.026    | 3.3E-09   | 0.349    | 3200 | Emilsson | 34.17751479 |
| ENDOU   | rs2072117  | 12 | 48131728  | G | A | -0.163  | 0.026    | 3.8E-10   | 0.711    | 3200 | Emilsson | 39.30325444 |
| CA3     | rs2072696  | 8  | 86351051  | C | G | -0.2169 | 0.0289   | 6.8E-14   | 0.23803  | 3301 | Sun      | 56.32788161 |
| SIGLEC9 | rs2075803  | 19 | 51628529  | G | A | -1.2255 | 0.0123   | 1E-200    | 0.55088  | 3301 | Sun      | 9926.963117 |
| UCMA    | rs2093847  | 10 | 13276534  | T | C | -0.5863 | 0.0382   | 3.1E-53   | 0.106703 | 3301 | Sun      | 235.5662468 |
| TIMP3   | rs2097326  | 22 | 33165020  | G | A | 0.9307  | 0.039673 | 4.424E-97 | 0.27873  | 992  | Suhre    | 550.328922  |
| LILRB1  | rs2114511  | 19 | 55145093  | C | G | -1.8056 | 0.046    | 1E-200    | 0.051234 | 3301 | Sun      | 1540.733157 |
| SIGLEC6 | rs2124910  | 19 | 52025247  | T | C | 0.653   | 0.043363 | 2.748E-46 | 0.407352 | 993  | Suhre    | 226.769748  |
| FUT8    | rs2127870  | 14 | 65796846  | C | G | -1.049  | 0.0246   | 1E-200    | 0.784568 | 3301 | Sun      | 1818.363739 |
| GPC5    | rs2147190  | 13 | 92058888  | T | C | 0.3335  | 0.044856 | 2.267E-13 | 0.336355 | 993  | Suhre    | 55.27657197 |
| ACP6    | rs2153463  | 1  | 147124310 | G | T | 0.944   | 0.022    | 1E-200    | 0.739    | 3200 | Emilsson | 1841.190083 |
| MANSC1  | rs2160588  | 12 | 12487447  | A | G | 0.5024  | 0.0371   | 8.7E-42   | 0.119697 | 3301 | Sun      | 183.3797778 |
| HP      | rs217184   | 16 | 72105965  | C | T | 0.8688  | 0.0277   | 1E-200    | 0.195652 | 3301 | Sun      | 983.7394466 |
| PTPRU   | rs2179795  | 1  | 29642318  | G | T | 0.154   | 0.028    | 3.8E-08   | 0.725    | 3200 | Emilsson | 30.25       |
| ZG16B   | rs2190809  | 16 | 2880614   | C | T | 0.156   | 0.027    | 1.5E-08   | 0.725    | 3200 | Emilsson | 33.38271605 |

|           |           |    |           |   |   |         |        |          |          |      |          |             |
|-----------|-----------|----|-----------|---|---|---------|--------|----------|----------|------|----------|-------------|
| CRP       | rs2211320 | 1  | 159693605 | G | A | 0.149   | 0.02   | 4.77E-14 | 0.677    | 6861 | Yao      | 55.5025     |
| NEGR1     | rs2220253 | 1  | 72565460  | T | C | 0.148   | 0.024  | 1.2E-09  | 0.545    | 3200 | Emilsson | 38.02777778 |
| PLAU      | rs2227551 | 10 | 75669190  | T | G | -0.2435 | 0.0266 | 5.4E-20  | 0.716116 | 3301 | Sun      | 83.79819379 |
| PRCP      | rs2229437 | 11 | 82564294  | G | T | 0.291   | 0.0315 | 2.8E-20  | 0.180887 | 3301 | Sun      | 85.34240363 |
| CRLF1     | rs2238647 | 19 | 18710535  | G | A | -0.286  | 0.029  | 1.4E-22  | 0.778    | 3200 | Emilsson | 97.26040428 |
| SNCA      | rs2245801 | 4  | 90757840  | C | T | -0.2507 | 0.0303 | 1.2E-16  | 0.788276 | 3301 | Sun      | 68.4578745  |
| IFNAR1    | rs2257167 | 21 | 34715699  | C | G | -0.2897 | 0.0363 | 1.4E-15  | 0.13427  | 3301 | Sun      | 63.69183192 |
| GPNMB     | rs2268748 | 7  | 23313171  | C | T | 0.6868  | 0.0619 | 1.2E-28  | 0.0406   | 3301 | Sun      | 123.1060155 |
| CD300A    | rs2272111 | 17 | 72469966  | G | A | 0.435   | 0.028  | 1.2E-52  | 0.788    | 3200 | Emilsson | 241.3584184 |
| CD59      | rs2273121 | 11 | 33757770  | A | G | -0.362  | 0.027  | 4.7E-41  | 0.251594 | 3301 | Sun      | 179.7585734 |
| MANBA     | rs227370  | 4  | 103612043 | C | T | -0.5596 | 0.0248 | 7.8E-113 | 0.674618 | 3301 | Sun      | 509.1573881 |
| CFH       | rs2274700 | 1  | 196682947 | A | G | 0.3665  | 0.0243 | 1.6E-51  | 0.398961 | 3301 | Sun      | 227.4759098 |
| COL18A1   | rs2274809 | 21 | 46906711  | G | A | 0.166   | 0.022  | 1.97E-14 | 0.645    | 6861 | Yao      | 56.9338843  |
| TIE1      | rs2275180 | 1  | 43773033  | G | A | 0.2538  | 0.0251 | 4.8E-24  | 0.623345 | 3301 | Sun      | 102.2435199 |
| LAMC2     | rs2276543 | 1  | 183155305 | A | G | 0.6155  | 0.0251 | 4.4E-133 | 0.279009 | 3301 | Sun      | 601.3241853 |
| PDIA5     | rs2278668 | 3  | 122835232 | C | T | -0.5216 | 0.0234 | 4E-110   | 0.593477 | 3301 | Sun      | 496.8707722 |
| CCDC126   | rs227934  | 7  | 23627287  | T | C | -0.2749 | 0.0246 | 6.9E-29  | 0.47897  | 3301 | Sun      | 124.8760824 |
| GSTO1     | rs2282326 | 10 | 106020398 | C | A | -0.9108 | 0.0204 | 1E-200   | 0.353535 | 3301 | Sun      | 1993.359862 |
| TPST2     | rs2283824 | 22 | 26924456  | A | G | 0.2429  | 0.0246 | 6E-23    | 0.416943 | 3301 | Sun      | 97.49555489 |
| B4GALT2   | rs2286241 | 1  | 44440769  | C | G | -0.673  | 0.052  | 3E-38    | 0.056172 | 3301 | Sun      | 167.5033284 |
| TYRO3     | rs2289743 | 15 | 41860698  | C | G | -0.161  | 0.027  | 2.1E-09  | 0.691    | 3200 | Emilsson | 35.5569273  |
| GSTA1     | rs2290758 | 6  | 52662153  | A | G | 0.4157  | 0.0237 | 7.2E-69  | 0.570024 | 3301 | Sun      | 307.6545603 |
| MAN2B2    | rs2301790 | 4  | 6600012   | G | A | 0.3342  | 0.0238 | 1E-44    | 0.483846 | 3301 | Sun      | 197.178236  |
| CRTAM     | rs2370794 | 11 | 122714782 | A | G | -0.236  | 0.026  | 5.8E-20  | 0.668    | 3200 | Emilsson | 82.39053254 |
| TIMP2     | rs2376999 | 17 | 76890864  | A | G | 0.418   | 0.037  | 3.3E-29  | 0.884    | 3200 | Emilsson | 127.6289262 |
| FGFR3     | rs2403274 | 4  | 1754515   | C | G | 0.177   | 0.029  | 6.7E-10  | 0.752    | 3200 | Emilsson | 37.25208086 |
| BPIFB1    | rs2424961 | 20 | 31694060  | T | C | -0.4366 | 0.0245 | 3.9E-71  | 0.578579 | 3301 | Sun      | 317.5669471 |
| CSGALNACT | rs2435349 | 10 | 43643466  | G | A | -0.1961 | 0.0278 | 1.6E-12  | 0.272811 | 3301 | Sun      | 49.75830702 |
| CA1       | rs2453868 | 8  | 86302696  | T | C | -0.147  | 0.025  | 2.2E-09  | 0.582    | 3200 | Emilsson | 34.5744     |
| HBZ       | rs2461286 | 16 | 203254    | G | A | -0.8846 | 0.0209 | 1E-200   | 0.646861 | 3301 | Sun      | 1791.436002 |
| LECT2     | rs248160  | 5  | 135293512 | T | C | -0.312  | 0.026  | 3.7E-33  | 0.67     | 3200 | Emilsson | 144         |
| RSPO3     | rs2489623 | 6  | 127455821 | C | A | 0.27    | 0.0245 | 3.6E-28  | 0.534679 | 3301 | Sun      | 121.4493961 |
| NRP1      | rs2506149 | 10 | 33480713  | T | C | -0.2805 | 0.0256 | 6.9E-28  | 0.358077 | 3301 | Sun      | 120.0565338 |
| NTM       | rs2511504 | 11 | 131196396 | T | C | -0.381  | 0.023  | 1.7E-58  | 0.588    | 3200 | Emilsson | 274.4064272 |
| ASPN      | rs2516568 | 9  | 95187380  | T | A | -0.4724 | 0.025  | 2.3E-79  | 0.323246 | 3301 | Sun      | 357.058816  |

|          |            |    |           |   |   |         |          |           |          |               |             |
|----------|------------|----|-----------|---|---|---------|----------|-----------|----------|---------------|-------------|
| TAPBPL   | rs2532497  | 12 | 6564210   | A | G | 1.2577  | 0.0163   | 1E-200    | 0.273692 | 3301 Sun      | 5953.58986  |
| KLK10    | rs2569454  | 19 | 51523203  | C | T | 0.405   | 0.026    | 4.5E-54   | 0.641    | 3200 Emilsson | 242.6405325 |
| PAM      | rs257309   | 5  | 102418604 | G | A | -0.4664 | 0.0248   | 3.8E-79   | 0.351714 | 3301 Sun      | 353.6826223 |
| MIA      | rs2604877  | 19 | 41275048  | C | T | 1.4417  | 0.0424   | 1E-200    | 0.068031 | 3301 Sun      | 1156.160383 |
| CPZ      | rs2631738  | 4  | 8479754   | G | A | 0.1949  | 0.0243   | 1E-15     | 0.519366 | 3301 Sun      | 64.32964148 |
| C9       | rs265721   | 5  | 39354069  | G | A | -0.375  | 0.06     | 5.9E-10   | 0.959    | 3200 Emilsson | 39.0625     |
| PENK     | rs2670014  | 8  | 57376781  | T | C | -0.4653 | 0.0234   | 1.3E-87   | 0.473963 | 3301 Sun      | 395.397929  |
| CCL4L1   | rs2687507  | 17 | 34433964  | C | T | -0.239  | 0.029    | 1.5E-16   | 0.747    | 3200 Emilsson | 67.92033294 |
| SOD3     | rs2695234  | 4  | 24804238  | G | A | -0.736  | 0.042    | 1.1E-64   | 0.919    | 3200 Emilsson | 307.0839002 |
| DSG2     | rs2704050  | 18 | 29095888  | G | A | -0.1687 | 0.0248   | 9.3E-12   | 0.49311  | 3301 Sun      | 46.27290908 |
| PCYOX1   | rs2706762  | 2  | 70488470  | C | T | 0.79    | 0.032    | 1.4E-121  | 0.86     | 3200 Emilsson | 609.4726563 |
| RPN1     | rs2712417  | 3  | 128345179 | G | A | -0.3447 | 0.0247   | 3.1E-44   | 0.618031 | 3301 Sun      | 194.7550198 |
| FUT10    | rs2732317  | 8  | 33330687  | C | A | -0.4501 | 0.0242   | 2.5E-77   | 0.61158  | 3301 Sun      | 345.9292569 |
| SCUBE1   | rs2744874  | 22 | 43715862  | T | C | -0.27   | 0.036    | 3.8E-14   | 0.866    | 3200 Emilsson | 56.25       |
| SERPINA1 | rs2749534  | 14 | 94809760  | G | A | 0.4267  | 0.053763 | 5.551E-15 | 0.201103 | 997 Suhre     | 62.99181366 |
| CD5L     | rs2765501  | 1  | 157804648 | G | A | -0.285  | 0.018    | 4.76E-54  | 0.608    | 6861 Yao      | 250.6944444 |
| RNASE3   | rs2771316  | 14 | 21430474  | C | T | 0.214   | 0.028    | 1.2E-14   | 0.723    | 3200 Emilsson | 58.41326531 |
| RET      | rs2795507  | 10 | 43352894  | C | T | -0.2768 | 0.0305   | 1.1E-19   | 0.796047 | 3301 Sun      | 82.36306369 |
| ICAM5    | rs281439   | 19 | 10400110  | C | G | 0.8918  | 0.0258   | 1E-200    | 0.7804   | 3301 Sun      | 1194.800853 |
| NCAM2    | rs2826851  | 21 | 22835946  | A | G | -0.37   | 0.027    | 1.7E-42   | 0.733    | 3200 Emilsson | 187.7914952 |
| MMP12    | rs28381684 | 11 | 102737192 | T | A | -0.7789 | 0.0348   | 5.1E-111  | 0.124644 | 3301 Sun      | 500.9621565 |
| MGAT2    | rs28396798 | 14 | 50075319  | T | C | 0.1949  | 0.0244   | 1.3E-15   | 0.54747  | 3301 Sun      | 63.80342986 |
| B3GNT8   | rs284663   | 19 | 41932612  | T | C | 0.744   | 0.021    | 1E-200    | 0.56     | 3200 Emilsson | 1255.183673 |
| COLEC12  | rs2846667  | 18 | 466810    | G | T | 0.202   | 0.0296   | 9.3E-12   | 0.745476 | 3301 Sun      | 46.57140248 |
| PLXNB2   | rs28573806 | 22 | 50727792  | C | T | 0.5315  | 0.0232   | 3.5E-116  | 0.399591 | 3301 Sun      | 524.8444003 |
| NUDT9    | rs28696943 | 4  | 88310135  | G | A | -0.3571 | 0.0323   | 2.3E-28   | 0.166852 | 3301 Sun      | 122.2291118 |
| QDPR     | rs28719835 | 4  | 17520066  | T | C | -0.5668 | 0.0275   | 1E-94     | 0.242578 | 3301 Sun      | 424.8095736 |
| GDI2     | rs2890364  | 10 | 5833748   | G | A | 0.219   | 0.029    | 9.1E-14   | 0.774    | 3200 Emilsson | 57.02853746 |
| TNFAIP6  | rs289828   | 2  | 152137181 | T | C | -0.5479 | 0.0237   | 5.5E-118  | 0.62173  | 3301 Sun      | 534.448557  |
| HIBCH    | rs291447   | 2  | 191177005 | A | C | -0.631  | 0.023    | 2.9E-152  | 0.393    | 3200 Emilsson | 752.6672968 |
| ERAP2    | rs2927608  | 5  | 96252432  | A | G | 1.0523  | 0.0168   | 1E-200    | 0.437292 | 3301 Sun      | 3923.381838 |
| ISLR2    | rs2959011  | 15 | 74611781  | T | A | 0.198   | 0.0261   | 3.2E-14   | 0.34226  | 3301 Sun      | 57.55053508 |
| SULT2A1  | rs296369   | 19 | 48371853  | C | T | 0.36    | 0.033    | 1.7E-27   | 0.843    | 3200 Emilsson | 119.0082645 |
| S100A7   | rs3014860  | 1  | 153314782 | A | G | -1.208  | 0.051    | 1.8E-114  | 0.948    | 3200 Emilsson | 561.0396002 |
| PDIA3    | rs3110081  | 15 | 43995786  | C | T | 0.194   | 0.032    | 1.5E-09   | 0.821    | 3200 Emilsson | 36.75390625 |



|          |            |    |           |   |   |         |          |           |          |      |          |             |
|----------|------------|----|-----------|---|---|---------|----------|-----------|----------|------|----------|-------------|
| CCL8     | rs3138036  | 17 | 32647544  | G | A | -0.4704 | 0.060132 | 1.326E-14 | 0.145436 | 997  | Suhre    | 61.19547132 |
| CD14     | rs3138074  | 5  | 140015932 | A | T | 0.332   | 0.022    | 9.22E-53  | 0.777    | 6861 | Yao      | 227.7355372 |
| TPST1    | rs313829   | 7  | 65552497  | G | A | 0.2313  | 0.0262   | 1.1E-18   | 0.688554 | 3301 | Sun      | 77.93789698 |
| CP       | rs34004251 | 3  | 148929951 | T | A | -0.263  | 0.025    | 4.91E-25  | 0.812    | 6861 | Yao      | 110.6704    |
| PXDN     | rs34008669 | 2  | 1709779   | G | A | 0.158   | 0.023    | 1.8E-11   | 0.502    | 3200 | Emilsson | 47.19092628 |
| CACNA2D3 | rs34084772 | 3  | 54153517  | A | G | -0.2329 | 0.0323   | 5.1E-13   | 0.184066 | 3301 | Sun      | 51.99168975 |
| RETN     | rs34124816 | 19 | 7733676   | C | A | -0.6083 | 0.0645   | 4.4E-21   | 0.037632 | 3301 | Sun      | 88.94390722 |
| FLT4     | rs34221241 | 5  | 180057293 | C | T | -0.363  | 0.0401   | 1.5E-19   | 0.104286 | 3301 | Sun      | 81.94538591 |
| KDR      | rs34231037 | 4  | 55972946  | G | A | -1.1531 | 0.0649   | 1E-70     | 0.033769 | 3301 | Sun      | 315.6781703 |
| GPC5     | rs342702   | 13 | 92422946  | T | G | -0.8042 | 0.0247   | 1E-200    | 0.274008 | 3301 | Sun      | 1060.069236 |
| GLTPD2   | rs34460487 | 17 | 4685228   | A | G | 0.2669  | 0.0259   | 6.8E-25   | 0.346378 | 3301 | Sun      | 106.1934229 |
| TCN1     | rs34528912 | 11 | 59631535  | T | C | -0.7109 | 0.0624   | 4.6E-30   | 0.04157  | 3301 | Sun      | 129.7919774 |
| CTSH     | rs34593439 | 15 | 79234957  | A | G | -1.147  | 0.0346   | 1E-200    | 0.110656 | 3301 | Sun      | 1098.941662 |
| H6PD     | rs34603401 | 1  | 9305445   | C | A | 0.7589  | 0.0317   | 1E-126    | 0.150217 | 3301 | Sun      | 573.1266208 |
| HS6ST1   | rs34827544 | 2  | 129084425 | T | C | -0.3048 | 0.0348   | 1.9E-18   | 0.157293 | 3301 | Sun      | 76.71343639 |
| COCH     | rs34907608 | 14 | 31330413  | A | G | 0.4759  | 0.0366   | 1E-38     | 0.118636 | 3301 | Sun      | 169.0710457 |
| WFDC5    | rs35017113 | 20 | 43692684  | C | T | 0.229   | 0.033    | 4.7E-12   | 0.843    | 3200 | Emilsson | 48.15518825 |
| IL27RA   | rs35026308 | 19 | 14153293  | C | T | -0.9457 | 0.0286   | 1E-200    | 0.176436 | 3301 | Sun      | 1093.389029 |
| TEK      | rs35030851 | 9  | 27197486  | T | G | 0.5573  | 0.057    | 1.4E-22   | 0.046653 | 3301 | Sun      | 95.59350262 |
| DNER     | rs35032874 | 2  | 230309360 | T | G | 0.162   | 0.029    | 1.7E-08   | 0.741    | 3200 | Emilsson | 31.20570749 |
| AHSG     | rs35094235 | 3  | 186328951 | G | T | 0.6252  | 0.0255   | 2E-132    | 0.731004 | 3301 | Sun      | 601.1150173 |
| AZU1     | rs351976   | 19 | 806673    | T | C | 0.216   | 0.027    | 1.5E-15   | 0.709    | 3200 | Emilsson | 64          |
| NPW      | rs35327014 | 16 | 2076202   | G | A | -0.4266 | 0.0288   | 1.6E-49   | 0.231175 | 3301 | Sun      | 219.4101563 |
| THBS4    | rs35351529 | 5  | 79390222  | T | C | -0.298  | 0.044    | 2.3E-11   | 0.923    | 3200 | Emilsson | 45.86983471 |
| LILRA6   | rs35361042 | 19 | 54748737  | G | C | 1.3399  | 0.0376   | 1E-200    | 0.091124 | 3301 | Sun      | 1269.898717 |
| WISP1    | rs35472615 | 8  | 134197537 | A | G | 0.5113  | 0.0263   | 1.7E-84   | 0.274129 | 3301 | Sun      | 377.9549943 |
| CLMP     | rs35483681 | 11 | 123045730 | T | C | 0.2494  | 0.0246   | 4.5E-24   | 0.553649 | 3301 | Sun      | 102.78333   |
| CFHR5    | rs35662416 | 1  | 196967354 | A | G | -1.2002 | 0.0682   | 3E-69     | 0.030392 | 3301 | Sun      | 309.6980676 |
| OSMR     | rs357253   | 5  | 38907422  | T | C | 0.2089  | 0.0292   | 8.3E-13   | 0.231854 | 3301 | Sun      | 51.18128401 |
| DYNLL2   | rs35729384 | 17 | 56178900  | C | T | 0.161   | 0.025    | 2.9E-10   | 0.698    | 3200 | Emilsson | 41.4736     |
| RBP4     | rs36014035 | 10 | 95360027  | A | C | 0.147   | 0.025    | 7.2E-09   | 0.643    | 3200 | Emilsson | 34.5744     |
| FETUB    | rs3733159  | 3  | 186360409 | G | T | 0.2662  | 0.043578 | 1.433E-09 | 0.312437 | 997  | Suhre    | 37.3146113  |
| CDON     | rs3740909  | 11 | 125889526 | T | C | -0.8286 | 0.077915 | 4.415E-25 | 0.073011 | 993  | Suhre    | 113.0949884 |
| CPB2     | rs3742264  | 13 | 46648094  | T | C | 0.849   | 0.039827 | 2.806E-83 | 0.320603 | 995  | Suhre    | 454.4132985 |
| PLA2R1   | rs3749117  | 2  | 160885442 | C | T | -0.9021 | 0.0188   | 1E-200    | 0.501272 | 3301 | Sun      | 2302.46834  |

|          |            |    |           |   |   |         |          |           |          |                |             |
|----------|------------|----|-----------|---|---|---------|----------|-----------|----------|----------------|-------------|
| FAM3D    | rs3749290  | 3  | 58652292  | T | G | -0.481  | 0.0413   | 2E-31     | 0.09578  | 3301 Sun       | 135.6407085 |
| RGMA     | rs3752102  | 15 | 93616014  | A | C | -0.2012 | 0.0245   | 2.5E-16   | 0.473455 | 3301 Sun       | 67.44096626 |
| TFF1     | rs3761376  | 21 | 43787038  | A | G | -0.2204 | 0.0291   | 3.9E-14   | 0.241766 | 3301 Sun       | 57.36370614 |
| B3GALT6  | rs3766186  | 1  | 1162435   | C | A | 0.271   | 0.041    | 6.5E-11   | 0.899    | 3200 Emilsson  | 43.68887567 |
| MAN1C1   | rs3767879  | 1  | 26070909  | C | T | 0.172   | 0.023    | 9.3E-14   | 0.465    | 3200 Emilsson  | 55.92438563 |
| LAG3     | rs3782735  | 12 | 6885076   | A | G | 0.154   | 0.025    | 4.3E-10   | 0.607    | 3200 Emilsson  | 37.9456     |
| GNRH2    | rs3787480  | 20 | 3016895   | A | G | -0.2403 | 0.0342   | 2.3E-12   | 0.148627 | 3301 Sun       | 49.36911357 |
| TREM1    | rs3789204  | 6  | 41254741  | G | T | -0.374  | 0.024    | 1.4E-54   | 0.693    | 3200 Emilsson  | 242.8402778 |
| LEPR     | rs3790438  | 1  | 66085525  | A | T | -1.3745 | 0.0219   | 1E-200    | 0.175255 | 3301 Sun       | 3939.138571 |
| TNFRSF19 | rs3814787  | 13 | 24152370  | G | C | -0.166  | 0.026    | 2.1E-10   | 0.714    | 3200 Emilsson  | 40.76331361 |
| IDUA     | rs3822020  | 4  | 985727    | G | A | 0.608   | 0.0235   | 7.2E-148  | 0.636581 | 3301 Sun       | 669.3779991 |
| PLEKHA7  | rs382280   | 11 | 16857799  | T | C | 0.2767  | 0.04     | 4.8E-12   | 0.121245 | 3301 Sun       | 47.85180625 |
| CST6     | rs3825068  | 11 | 65768093  | G | A | 0.5965  | 0.0757   | 3.2E-15   | 0.027795 | 3301 Sun       | 62.091069   |
| IL17RA   | rs3827278  | 22 | 17595915  | A | C | 0.975   | 0.0426   | 1.969E-93 | 0.231695 | 997 Suhre      | 523.837959  |
| SIRPB1   | rs3848788  | 20 | 1543066   | A | G | 0.7453  | 0.0239   | 1E-200    | 0.304983 | 3301 Sun       | 972.4481189 |
| WFDC1    | rs400345   | 16 | 84328494  | C | T | 0.451   | 0.029    | 5.5E-54   | 0.791    | 3200 Emilsson  | 241.8561237 |
| GPC1     | rs4074478  | 2  | 241446340 | T | C | 0.4237  | 0.0409   | 4.3E-25   | 0.106437 | 3301 Sun       | 107.3174419 |
| CTSS     | rs41271951 | 1  | 150737220 | G | A | -0.8605 | 0.0419   | 7.1E-94   | 0.08349  | 3301 Sun       | 421.7680749 |
| VEGFC    | rs41278571 | 4  | 177650866 | T | C | 1.7416  | 0.1215   | 1.3E-46   | 0.010126 | 3301 Sun       | 205.4680391 |
| COL15A1  | rs41305481 | 9  | 101767385 | G | A | 0.2437  | 0.027    | 1.9E-19   | 0.301866 | 3301 Sun       | 81.46733882 |
| SWAP70   | rs415895   | 11 | 9769562   | G | C | -0.2659 | 0.0256   | 3.5E-25   | 0.649843 | 3301 Sun       | 107.8839264 |
| PTGFRN   | rs4233450  | 1  | 117490261 | T | G | 1.0007  | 0.0283   | 1E-200    | 0.829141 | 3301 Sun       | 1250.359587 |
| CCL5     | rs4239252  | 17 | 34163565  | A | G | -0.3458 | 0.052581 | 7.825E-11 | 0.211345 | 996 Suhre      | 43.25059933 |
| C7       | rs429017   | 5  | 41263091  | A | G | 0.4333  | 0.049515 | 9.039E-18 | 0.252792 | 985 Suhre      | 76.57944799 |
| REG3G    | rs429694   | 2  | 79244586  | A | C | -0.487  | 0.028    | 9.5E-63   | 0.794    | 3200 Emilsson  | 302.5114796 |
| ACE      | rs4344     | 17 | 61566724  | A | G | -0.583  | 0.022    | 8.5E-136  | 0.499    | 3200 Emilsson  | 702.25      |
| HDGF     | rs4399146  | 1  | 156713558 | G | A | 0.269   | 0.027    | 3.2E-23   | 0.717    | 3200 Emilsson  | 99.260631   |
| OSCAR    | rs4442925  | 19 | 54554950  | T | C | 0.138   | 0.024    | 1.3E-08   | 0.455    | 3200 Emilsson  | 33.0625     |
| OBP2B    | rs4454354  | 9  | 136089529 | C | T | 0.358   | 0.0298   | 2.7E-33   | 0.786126 | 3301 Sun       | 144.3223278 |
| PDCD5    | rs4499344  | 19 | 33073431  | A | G | 0.354   | 0.0269   | 1.2E-39   | 0.291128 | 3301 Sun       | 173.1816863 |
| TIMP4    | rs454615   | 3  | 12077010  | C | T | 0.4903  | 0.0318   | 1.7E-53   | 0.830831 | 3301 Sun       | 237.7220937 |
| SEMA4D   | rs45464494 | 9  | 91994433  | C | T | 1.278   | 0.041    | 1.5E-187  | 0.929    | 3200 Emilsson  | 971.6145152 |
| ARFIP1   | rs4619875  | 4  | 153701130 | T | C | 0.239   | 0.0248   | 6.6E-22   | 0.403628 | 3301 Sun       | 92.87363424 |
| SPINK1   | rs4705205  | 5  | 147218813 | T | C | -0.212  | 0.025    | 1.5E-17   | 0.573    | 3200 Emilsson  | 71.9104     |
| MMP1     | rs471994   | 11 | 102697731 | G | A | 0.32    | 0.025785 | 2.3E-35   | 0.65     | 3394 Folkersen | 154.0136753 |

|             |            |    |           |   |   |         |          |           |          |      |          |             |
|-------------|------------|----|-----------|---|---|---------|----------|-----------|----------|------|----------|-------------|
| ACHE        | rs4727469  | 7  | 100509163 | C | T | -0.297  | 0.023    | 7.5E-37   | 0.524    | 3200 | Emilsson | 166.7466919 |
| HSD17B14    | rs473464   | 19 | 49334248  | T | C | 0.145   | 0.026    | 2.7E-08   | 0.498    | 3200 | Emilsson | 31.10207101 |
| OAS1        | rs4767027  | 12 | 113359157 | C | T | -0.2701 | 0.0256   | 6.2E-26   | 0.653837 | 3301 | Sun      | 111.318985  |
| IL16        | rs4778639  | 15 | 81600451  | G | T | -0.6805 | 0.042    | 4.5E-59   | 0.09142  | 3301 | Sun      | 262.5171485 |
| CRISP2      | rs478328   | 6  | 49720877  | G | A | 0.5695  | 0.0227   | 4.2E-139  | 0.454081 | 3301 | Sun      | 629.413049  |
| SECTM1      | rs4789763  | 17 | 80289284  | G | A | 0.2805  | 0.0246   | 3.8E-30   | 0.492828 | 3301 | Sun      | 130.0156157 |
| LGALS3BP    | rs4789847  | 17 | 77004644  | A | G | -0.196  | 0.033    | 3.9E-09   | 0.829    | 3200 | Emilsson | 35.27640037 |
| TMEM190     | rs4806666  | 19 | 55888095  | T | C | -0.997  | 0.0177   | 1E-200    | 0.438473 | 3301 | Sun      | 3172.807942 |
| TCN2        | rs4820885  | 22 | 31012756  | C | T | -0.7247 | 0.0212   | 1E-200    | 0.549103 | 3301 | Sun      | 1168.543276 |
| PDE5A       | rs4834770  | 4  | 120241849 | A | G | -0.314  | 0.044617 | 3.633E-12 | 0.434171 | 995  | Suhre    | 49.52810955 |
| CREB3L4     | rs4845586  | 1  | 153942597 | G | T | 0.2556  | 0.0248   | 7.1E-25   | 0.46994  | 3301 | Sun      | 106.2229448 |
| TF          | rs4854760  | 3  | 133498741 | A | G | -0.227  | 0.028    | 6.1E-16   | 0.735    | 3200 | Emilsson | 65.72576531 |
| CXCL10      | rs4859589  | 4  | 76948299  | G | A | 0.133   | 0.024398 | 5E-08     | 0.505    | 3200 | Emilsson | 29.71678549 |
| ART3        | rs4859610  | 4  | 77000441  | G | A | -0.3378 | 0.0286   | 3E-32     | 0.774293 | 3301 | Sun      | 139.5041811 |
| TNFRSF10B   | rs4871844  | 8  | 22879734  | T | C | -0.143  | 0.026    | 4.3E-08   | 0.658    | 3200 | Emilsson | 30.25       |
| CFHR4       | rs4915559  | 1  | 196886770 | T | C | 0.655   | 0.026    | 1.7E-131  | 0.753    | 3200 | Emilsson | 634.6523669 |
| MFAP2       | rs4920605  | 1  | 17315425  | A | G | 0.2073  | 0.0243   | 1.3E-17   | 0.553544 | 3301 | Sun      | 72.77564396 |
| IL12B       | rs4921484  | 5  | 158769753 | C | T | 0.3123  | 0.0262   | 7.2E-33   | 0.678009 | 3301 | Sun      | 142.0827603 |
| FMOD        | rs4971253  | 1  | 203321414 | G | A | 0.25    | 0.045    | 2.7E-08   | 0.921    | 3200 | Emilsson | 30.86419753 |
| TPSAB1;TPSI | rs4984778  | 16 | 1297516   | C | G | 0.5167  | 0.046322 | 2.678E-27 | 0.284639 | 996  | Suhre    | 124.4245472 |
| GNPTG       | rs4984820  | 16 | 1407809   | C | T | -0.344  | 0.046    | 8E-14     | 0.923    | 3200 | Emilsson | 55.92438563 |
| LCT         | rs4988235  | 2  | 136608646 | A | G | 0.7759  | 0.0244   | 1E-200    | 0.711217 | 3301 | Sun      | 1011.18787  |
| MTRF1L      | rs503366   | 6  | 153333550 | C | T | 0.1652  | 0.0243   | 1.1E-11   | 0.497366 | 3301 | Sun      | 46.21761588 |
| APOB        | rs520354   | 2  | 21259612  | G | A | 0.3033  | 0.041676 | 6.929E-13 | 0.473394 | 996  | Suhre    | 52.96220923 |
| LY9         | rs540254   | 1  | 160767737 | C | T | 0.4173  | 0.044803 | 7.783E-20 | 0.353266 | 995  | Suhre    | 86.7532742  |
| CLEC1B      | rs544605   | 12 | 10146707  | T | C | -0.504  | 0.028    | 4.8E-70   | 0.781    | 3200 | Emilsson | 324         |
| CALCOCO2    | rs550510   | 17 | 46926615  | G | A | 0.19    | 0.033    | 1E-08     | 0.843    | 3200 | Emilsson | 33.1496786  |
| LPA         | rs55730499 | 6  | 161005610 | C | T | -1.255  | 0.046    | 3.77E-167 | 0.939    | 6861 | Yao      | 744.3407372 |
| PGLYRP2     | rs55866012 | 19 | 15578008  | T | G | 0.486   | 0.033    | 1.8E-47   | 0.842    | 3200 | Emilsson | 216.892562  |
| CTSC        | rs55897509 | 11 | 88066714  | A | C | -0.926  | 0.041    | 2.3E-107  | 0.918    | 3200 | Emilsson | 510.0987507 |
| XXYLT1      | rs55947051 | 3  | 194783033 | T | C | -0.248  | 0.033    | 8.6E-14   | 0.841    | 3200 | Emilsson | 56.4775023  |
| VAV1        | rs56100731 | 19 | 6857245   | C | T | 0.363   | 0.048    | 5.6E-14   | 0.93     | 3200 | Emilsson | 57.19140625 |
| RNASE2      | rs56204594 | 14 | 21433367  | C | A | 0.2366  | 0.0244   | 3.2E-22   | 0.464292 | 3301 | Sun      | 94.02640419 |
| OLFM2       | rs56243392 | 19 | 10061960  | A | T | -0.673  | 0.024    | 6E-157    | 0.651    | 3200 | Emilsson | 786.3350694 |
| FCN2        | rs57136797 | 9  | 137752540 | T | A | -0.6346 | 0.0353   | 3.7E-72   | 0.163996 | 3301 | Sun      | 323.1846496 |

|          |            |    |           |   |   |         |          |           |          |               |             |
|----------|------------|----|-----------|---|---|---------|----------|-----------|----------|---------------|-------------|
| LRRC15   | rs57514363 | 3  | 194087927 | G | T | 0.5927  | 0.0383   | 5.9E-54   | 0.112882 | 3301 Sun      | 239.4816857 |
| LGALS2   | rs5756729  | 22 | 37961353  | T | C | -0.275  | 0.0259   | 2.2E-26   | 0.592511 | 3301 Sun      | 112.7368405 |
| ENTPD5   | rs57731447 | 14 | 74487521  | A | G | -0.9668 | 0.0489   | 7.8E-87   | 0.05877  | 3301 Sun      | 390.8909046 |
| CFHR1    | rs57809726 | 1  | 196841377 | A | G | 1.295   | 0.027    | 1E-200    | 0.862    | 3200 Emilsson | 2300.445816 |
| S100A4   | rs58056804 | 1  | 153524706 | A | G | 0.5046  | 0.0565   | 4.5E-19   | 0.049682 | 3301 Sun      | 79.76228679 |
| FCRL6    | rs58240276 | 1  | 159783559 | T | C | -0.6094 | 0.0299   | 3.1E-92   | 0.190167 | 3301 Sun      | 415.3962036 |
| ERLEC1   | rs58359565 | 2  | 53958919  | A | C | -0.2076 | 0.0295   | 2.1E-12   | 0.218741 | 3301 Sun      | 49.5234243  |
| GRN      | rs5848     | 17 | 42430244  | T | C | -0.2763 | 0.0281   | 8.1E-23   | 0.28735  | 3301 Sun      | 96.68278011 |
| CRTAC1   | rs588061   | 10 | 99642731  | C | T | 0.346   | 0.024    | 8.6E-47   | 0.529    | 3200 Emilsson | 207.8402778 |
| NOV      | rs58936256 | 8  | 120422799 | C | T | 0.2085  | 0.0301   | 4.2E-12   | 0.215178 | 3301 Sun      | 47.98208629 |
| CDH11    | rs59614634 | 16 | 65029943  | A | T | 0.803   | 0.036    | 3.4E-101  | 0.89     | 3200 Emilsson | 497.5378086 |
| RNPEP    | rs59698324 | 1  | 201965855 | C | T | 0.371   | 0.027    | 3.8E-42   | 0.725    | 3200 Emilsson | 188.8079561 |
| SHANK3   | rs6010042  | 22 | 51098764  | G | A | -0.327  | 0.027    | 6.6E-33   | 0.748    | 3200 Emilsson | 146.6790123 |
| SPINT3   | rs6017591  | 20 | 44141041  | C | T | 0.5431  | 0.0227   | 6E-127    | 0.541306 | 3301 Sun      | 572.4108948 |
| SIRPG    | rs6043409  | 20 | 1616206   | G | A | 0.2628  | 0.0261   | 8.1E-24   | 0.652477 | 3301 Sun      | 101.3840666 |
| RSPO4    | rs6056847  | 20 | 1028346   | G | A | -0.172  | 0.023    | 9E-14     | 0.575    | 3200 Emilsson | 55.92438563 |
| GRAMD1C  | rs61077924 | 3  | 113625933 | G | C | 0.6198  | 0.0239   | 3.4E-148  | 0.324013 | 3301 Sun      | 672.5233102 |
| CST2     | rs6114248  | 20 | 23711882  | A | G | 0.5148  | 0.042887 | 4.39E-31  | 0.314573 | 995 Suhre     | 144.0854982 |
| CST1     | rs6114248  | 20 | 23711882  | A | G | 0.564   | 0.042554 | 5.048E-37 | 0.314573 | 995 Suhre     | 175.6608501 |
| SIRPA    | rs6136377  | 20 | 1896288   | G | A | -1.2106 | 0.0153   | 1E-200    | 0.368754 | 3301 Sun      | 6260.636336 |
| CST5     | rs6138152  | 20 | 23850130  | G | A | 0.7176  | 0.050071 | 1.76E-42  | 0.195587 | 997 Suhre     | 205.3955084 |
| CST7     | rs6138458  | 20 | 24973769  | A | G | -0.7626 | 0.046919 | 7.603E-53 | 0.227182 | 997 Suhre     | 264.1741802 |
| NELL1    | rs61652119 | 11 | 20955270  | A | G | 1.1098  | 0.0553   | 1.3E-89   | 0.048674 | 3301 Sun      | 402.7533657 |
| CDNF     | rs61738953 | 10 | 14862082  | G | C | -0.6293 | 0.0681   | 2.5E-20   | 0.041783 | 3301 Sun      | 85.39279715 |
| EMILIN3  | rs61739314 | 20 | 39990377  | C | G | -0.6855 | 0.0691   | 3.6E-23   | 0.033292 | 3301 Sun      | 98.41443953 |
| TEPSIN   | rs61745945 | 17 | 79205421  | A | G | -0.8768 | 0.0986   | 5.9E-19   | 0.016358 | 3301 Sun      | 79.07646606 |
| SVEP1    | rs61751937 | 9  | 113312231 | C | G | 1.1854  | 0.0702   | 5.2E-64   | 0.030029 | 3301 Sun      | 285.138343  |
| INPP5B   | rs61778082 | 1  | 38306356  | T | C | 0.547   | 0.034    | 2.1E-55   | 0.865    | 3200 Emilsson | 258.8313149 |
| TMEM132D | rs61943549 | 12 | 130092229 | T | C | -0.486  | 0.055    | 1E-18     | 0.948    | 3200 Emilsson | 78.08132231 |
| LGALS9   | rs62055780 | 17 | 25971795  | T | C | 0.203   | 0.03     | 7.9E-12   | 0.753    | 3200 Emilsson | 45.78777778 |
| NPTX1    | rs62069681 | 17 | 78624702  | C | T | 0.514   | 0.0417   | 7.6E-35   | 0.09319  | 3301 Sun      | 151.9337048 |
| CD300C   | rs62087214 | 17 | 72467626  | G | A | -0.6787 | 0.0637   | 1.7E-26   | 0.038512 | 3301 Sun      | 113.5211635 |
| SERPINF1 | rs62088172 | 17 | 1666253   | T | C | -0.4449 | 0.0251   | 1.8E-70   | 0.344526 | 3301 Sun      | 314.1791559 |
| ASIP     | rs62212171 | 20 | 32987687  | T | C | -0.814  | 0.037    | 9.6E-98   | 0.89     | 3200 Emilsson | 484         |
| CYTL1    | rs62291616 | 4  | 5052063   | T | C | -0.354  | 0.029    | 1.2E-32   | 0.814    | 3200 Emilsson | 149.0083234 |

|          |            |    |           |   |   |         |          |           |          |               |             |
|----------|------------|----|-----------|---|---|---------|----------|-----------|----------|---------------|-------------|
| PCSK1    | rs6234     | 5  | 95728974  | C | G | -1.0975 | 0.0209   | 1E-200    | 0.260198 | 3301 Sun      | 2757.506124 |
| IGF2R    | rs629849   | 6  | 160494409 | G | A | 0.8992  | 0.0331   | 9.5E-163  | 0.870653 | 3301 Sun      | 738.0004199 |
| CRHBP    | rs6414971  | 5  | 76170674  | T | A | -0.511  | 0.026    | 2.9E-79   | 0.741    | 3200 Emilsson | 386.2736686 |
| IL1RAP   | rs6444442  | 3  | 190346060 | G | A | -1.352  | 0.0246   | 1E-200    | 0.841013 | 3301 Sun      | 3020.530108 |
| UNC5D    | rs6468316  | 8  | 35237788  | T | C | 0.141   | 0.024    | 9.5E-09   | 0.417    | 3200 Emilsson | 34.515625   |
| C1RL     | rs6488561  | 12 | 7246894   | G | A | 0.27    | 0.027    | 5.6E-24   | 0.695    | 3200 Emilsson | 100         |
| EVA1C    | rs6517101  | 21 | 33868483  | G | T | 0.1792  | 0.026    | 5.9E-12   | 0.331469 | 3301 Sun      | 47.50390533 |
| IL18RAP  | rs6543140  | 2  | 103074274 | T | G | 0.4854  | 0.046024 | 1.013E-24 | 0.301308 | 994 Suhre     | 111.234064  |
| JAM3     | rs655627   | 11 | 134021859 | A | G | 0.184   | 0.024    | 4.1E-14   | 0.566    | 3200 Emilsson | 58.77777778 |
| SERPINA3 | rs6575449  | 14 | 95097303  | T | C | -0.4323 | 0.053511 | 1.903E-15 | 0.18593  | 995 Suhre     | 65.26603939 |
| NFASC    | rs6667532  | 1  | 204948659 | G | A | 0.8226  | 0.0387   | 4.1E-100  | 0.10515  | 3301 Sun      | 451.8096268 |
| MAPKAPK2 | rs6669284  | 1  | 206890435 | A | G | 0.3261  | 0.044323 | 3.902E-13 | 0.349398 | 996 Suhre     | 54.13139021 |
| PRDX6    | rs6671141  | 1  | 173446934 | T | G | -0.413  | 0.034    | 8.8E-33   | 0.85     | 3200 Emilsson | 147.5510381 |
| EPHB2    | rs6687487  | 1  | 23061551  | A | G | -0.6122 | 0.0447   | 1.3E-42   | 0.080316 | 3301 Sun      | 187.5735527 |
| EDAR     | rs6750059  | 2  | 109611097 | C | T | -0.44   | 0.049005 | 1.343E-18 | 0.248996 | 996 Suhre     | 80.61582672 |
| IL1RN    | rs6761276  | 2  | 113832312 | C | T | -0.1907 | 0.0248   | 1.5E-14   | 0.577697 | 3301 Sun      | 59.1286583  |
| IL17RD   | rs6776722  | 3  | 57142659  | A | G | -0.4623 | 0.0254   | 3.4E-74   | 0.695339 | 3301 Sun      | 331.268662  |
| CD200R1  | rs6791672  | 3  | 112591392 | A | G | -0.1759 | 0.0252   | 2.8E-12   | 0.590611 | 3301 Sun      | 48.7226159  |
| LRRN1    | rs6801789  | 3  | 3807592   | C | T | 0.246   | 0.0253   | 2.3E-22   | 0.354026 | 3301 Sun      | 94.5429549  |
| AFP      | rs6829551  | 4  | 74173715  | T | C | 0.187   | 0.031    | 2.4E-09   | 0.812    | 3200 Emilsson | 36.38813736 |
| PDLIM4   | rs6864922  | 5  | 131616290 | C | T | 0.676   | 0.048    | 1.5E-44   | 0.937    | 3200 Emilsson | 198.3402778 |
| VEGFA    | rs6921438  | 6  | 43925607  | A | G | -0.7023 | 0.0215   | 1E-200    | 0.496842 | 3301 Sun      | 1067.009822 |
| ADAM22   | rs6966166  | 7  | 87455155  | T | C | -0.177  | 0.026    | 9.8E-12   | 0.478    | 3200 Emilsson | 46.34467456 |
| CA8      | rs7009482  | 8  | 61195053  | G | A | -0.188  | 0.025    | 5.9E-14   | 0.589    | 3200 Emilsson | 56.5504     |
| PTGDS    | rs7019538  | 9  | 139861470 | C | T | 0.1979  | 0.0246   | 7.8E-16   | 0.524107 | 3301 Sun      | 64.71744663 |
| B4GALT1  | rs7019909  | 9  | 33113322  | T | C | 0.4478  | 0.0402   | 7.9E-29   | 0.102573 | 3301 Sun      | 124.0840821 |
| PSAP     | rs7086891  | 10 | 73655350  | G | A | 0.619   | 0.025    | 3.6E-122  | 0.709    | 3200 Emilsson | 613.0576    |
| APOL1    | rs71314970 | 22 | 36638705  | T | C | -0.3659 | 0.0409   | 3.5E-19   | 0.105762 | 3301 Sun      | 80.03467818 |
| MGP      | rs7135211  | 12 | 15052758  | G | A | 0.265   | 0.019    | 3.62E-44  | 0.622    | 6861 Yao      | 194.5290859 |
| SPINT2   | rs71354995 | 19 | 38791841  | G | A | -0.9908 | 0.0227   | 1E-200    | 0.242563 | 3301 Sun      | 1905.110986 |
| LGMMN    | rs7140705  | 14 | 93224207  | T | G | -0.268  | 0.045    | 3.6E-09   | 0.913    | 3200 Emilsson | 35.46864198 |
| ADAMTS13 | rs71503194 | 9  | 136298131 | G | T | -0.8719 | 0.0404   | 4.4E-103  | 0.091229 | 3301 Sun      | 465.7690484 |
| APCS     | rs71632673 | 1  | 159536213 | A | C | -0.8369 | 0.082    | 1.9E-24   | 0.022925 | 3301 Sun      | 104.1644274 |
| MTHFS    | rs7173566  | 15 | 80211691  | C | T | -0.2126 | 0.0263   | 6E-16     | 0.342884 | 3301 Sun      | 65.3454004  |
| WFIKKN2  | rs7225465  | 17 | 48916159  | A | G | -0.6533 | 0.0238   | 9.3E-166  | 0.68203  | 3301 Sun      | 753.4794329 |

|         |            |    |           |   |   |         |         |           |          |      |          |             |
|---------|------------|----|-----------|---|---|---------|---------|-----------|----------|------|----------|-------------|
| ADGRE2  | rs7260110  | 19 | 14501544  | G | A | 0.2969  | 0.04471 | 5.169E-11 | 0.35994  | 996  | Suhre    | 44.09765787 |
| IL7     | rs72666886 | 8  | 79728782  | C | T | 0.34    | 0.042   | 5.3E-16   | 0.903    | 3200 | Emilsson | 65.53287982 |
| LRP12   | rs72679151 | 8  | 105627117 | C | T | -0.211  | 0.03    | 2.6E-12   | 0.796    | 3200 | Emilsson | 49.46777778 |
| AKR1A1  | rs72688441 | 1  | 46051053  | A | G | -1.18   | 0.0493  | 1.2E-126  | 0.058959 | 3301 | Sun      | 572.8885945 |
| CST4    | rs7270028  | 20 | 23681073  | C | A | 0.465   | 0.039   | 1.8E-31   | 0.896    | 3200 | Emilsson | 142.1597633 |
| IFI16   | rs72709516 | 1  | 159004851 | T | C | 0.8518  | 0.0577  | 2.6E-49   | 0.04404  | 3301 | Sun      | 217.9333251 |
| NTN1    | rs72809988 | 17 | 8986397   | A | G | -0.5788 | 0.038   | 1.6E-52   | 0.110474 | 3301 | Sun      | 232.0009972 |
| PCBD1   | rs72818110 | 10 | 72614896  | A | C | 0.374   | 0.057   | 7.6E-11   | 0.951    | 3200 | Emilsson | 43.052016   |
| GP1BA   | rs72835078 | 17 | 4826592   | T | G | 0.3281  | 0.0481  | 9.1E-12   | 0.071969 | 3301 | Sun      | 46.52884886 |
| ST3GAL6 | rs72934623 | 3  | 98509705  | A | G | -1.8784 | 0.0447  | 1E-200    | 0.053172 | 3301 | Sun      | 1765.879695 |
| POMGNT2 | rs729654   | 3  | 43147652  | T | C | -0.2561 | 0.0239  | 9.3E-27   | 0.473213 | 3301 | Sun      | 114.8215367 |
| GFRAL   | rs72975088 | 6  | 55535375  | T | A | 0.2467  | 0.0348  | 1.3E-12   | 0.1485   | 3301 | Sun      | 50.25506177 |
| THBS2   | rs73043857 | 6  | 169624900 | G | A | 0.8084  | 0.0383  | 6.9E-99   | 0.102347 | 3301 | Sun      | 445.5075432 |
| PZP     | rs7311982  | 12 | 9314857   | C | T | 0.5     | 0.019   | 2.7E-135  | 0.698    | 3200 | Emilsson | 692.5207756 |
| SELPLG  | rs73191242 | 12 | 109013956 | G | A | 0.209   | 0.03    | 2.1E-12   | 0.795    | 3200 | Emilsson | 48.53444444 |
| BST1    | rs73224660 | 4  | 15714762  | A | G | -1.3967 | 0.0239  | 1E-200    | 0.158997 | 3301 | Sun      | 3415.155354 |
| FAM3B   | rs73226194 | 21 | 42721869  | T | C | -1.1495 | 0.0614  | 3.9E-78   | 0.039928 | 3301 | Sun      | 350.4945013 |
| CD177   | rs73554000 | 19 | 43825494  | C | G | 1.8032  | 0.0787  | 4.4E-116  | 0.023826 | 3301 | Sun      | 524.97465   |
| ITIH2   | rs73621225 | 10 | 7740905   | T | A | -1.181  | 0.044   | 1.4E-142  | 0.933    | 3200 | Emilsson | 720.4344008 |
| DNAJC30 | rs73702564 | 7  | 73084816  | T | C | 0.7183  | 0.0622  | 6.9E-31   | 0.038602 | 3301 | Sun      | 133.361651  |
| SCARF2  | rs738086   | 22 | 20775556  | T | G | 0.2997  | 0.0318  | 4.8E-21   | 0.811314 | 3301 | Sun      | 88.82173371 |
| CFI     | rs7439493  | 4  | 110656730 | A | G | 0.3116  | 0.0246  | 8.9E-37   | 0.415959 | 3301 | Sun      | 160.4444444 |
| CBLN4   | rs74447607 | 20 | 54447947  | T | C | -0.2177 | 0.0312  | 3E-12     | 0.191752 | 3301 | Sun      | 48.68640081 |
| RRM2B   | rs74589258 | 8  | 103215228 | G | A | 0.3254  | 0.0479  | 1.1E-11   | 0.07035  | 3301 | Sun      | 46.14918868 |
| NUDT12  | rs74692061 | 5  | 102903643 | G | A | -0.3756 | 0.0341  | 2.8E-28   | 0.156975 | 3301 | Sun      | 121.3227956 |
| CCL25   | rs74959615 | 19 | 8121096   | A | G | -0.9718 | 0.0428  | 5.2E-114  | 0.078294 | 3301 | Sun      | 515.5446109 |
| CREG1   | rs7513428  | 1  | 167515272 | C | T | -0.3111 | 0.0334  | 1.4E-20   | 0.836173 | 3301 | Sun      | 86.75751192 |
| POGLUT1 | rs75203710 | 3  | 119121679 | C | T | 0.3935  | 0.0483  | 3.8E-16   | 0.070387 | 3301 | Sun      | 66.37357527 |
| HDHD2   | rs75228657 | 18 | 44741063  | G | A | 0.7021  | 0.0544  | 4.7E-38   | 0.052264 | 3301 | Sun      | 166.5712891 |
| LHB     | rs75287599 | 19 | 49517140  | T | C | -0.4342 | 0.0458  | 2.4E-21   | 0.077817 | 3301 | Sun      | 89.8770237  |
| PPT1    | rs7533094  | 1  | 40559686  | A | G | -0.8621 | 0.0603  | 2.3E-46   | 0.041979 | 3301 | Sun      | 204.3998938 |
| AMY1A   | rs7538379  | 1  | 104067356 | T | C | -1.0399 | 0.062   | 4.9E-63   | 0.039949 | 3301 | Sun      | 281.3194615 |
| BCAN    | rs7541549  | 1  | 156588439 | T | C | 0.201   | 0.029   | 5.6E-12   | 0.767    | 3200 | Emilsson | 48.039239   |
| SFRP4   | rs75474297 | 7  | 37973124  | T | A | -0.302  | 0.034   | 2.1E-18   | 0.855    | 3200 | Emilsson | 78.89619377 |
| APOA1   | rs75507001 | 11 | 116577694 | C | A | 0.55    | 0.061   | 1.7E-19   | 0.957    | 3200 | Emilsson | 81.29535071 |

|          |            |    |           |   |   |         |          |           |          |                |             |
|----------|------------|----|-----------|---|---|---------|----------|-----------|----------|----------------|-------------|
| IL1R2    | rs7561460  | 2  | 102617204 | C | T | -0.4025 | 0.0242   | 6.2E-62   | 0.395872 | 3301 Sun       | 276.6311215 |
| IL18     | rs75649625 | 11 | 112052194 | G | A | 0.29    | 0.030392 | 1.4E-21   | 0.76     | 3394 Folkersen | 91.05121025 |
| PSMB1    | rs756519   | 6  | 170850862 | G | A | 0.412   | 0.023    | 8.1E-67   | 0.531    | 3200 Emilsson  | 320.8771267 |
| RTN4R    | rs75766    | 22 | 20174853  | A | C | -0.3498 | 0.0283   | 4.8E-35   | 0.748115 | 3301 Sun       | 152.7800822 |
| IL1R1    | rs7588201  | 2  | 102746276 | A | C | 0.163   | 0.026    | 2.6E-10   | 0.722    | 3200 Emilsson  | 39.30325444 |
| NAGK     | rs7606102  | 2  | 71276399  | G | A | -0.432  | 0.0331   | 6E-39     | 0.170314 | 3301 Sun       | 170.3379852 |
| POFUT1   | rs76143353 | 20 | 30815755  | T | C | -0.8    | 0.0499   | 9.3E-58   | 0.059564 | 3301 Sun       | 257.0270802 |
| CDCP1    | rs7621542  | 3  | 45206484  | C | T | 0.18    | 0.031    | 5.9E-09   | 0.8      | 3200 Emilsson  | 33.71488033 |
| GSN      | rs76331566 | 9  | 124009014 | C | T | 0.398   | 0.068    | 5E-09     | 0.969    | 3200 Emilsson  | 34.25692042 |
| SPARCL1  | rs7681694  | 4  | 88462729  | A | G | 0.5315  | 0.0244   | 2.7E-105  | 0.3366   | 3301 Sun       | 474.4898045 |
| BTNL8    | rs7721375  | 5  | 180439650 | C | T | 0.273   | 0.024    | 1.4E-28   | 0.507    | 3200 Emilsson  | 129.390625  |
| CYB5D2   | rs77246175 | 17 | 4072761   | G | C | -0.342  | 0.046    | 2E-13     | 0.921    | 3200 Emilsson  | 55.27599244 |
| ADAM19   | rs7728609  | 5  | 156935524 | C | T | 0.246   | 0.026    | 1.2E-21   | 0.675    | 3200 Emilsson  | 89.52071006 |
| IL5RA    | rs77400868 | 3  | 3150964   | G | A | 0.5096  | 0.0362   | 6.8E-45   | 0.13908  | 3301 Sun       | 198.1717286 |
| CROT     | rs77463367 | 7  | 87006034  | C | G | 0.348   | 0.047    | 1.6E-13   | 0.93     | 3200 Emilsson  | 54.82299683 |
| DKK2     | rs77571736 | 4  | 107864984 | G | C | 0.945   | 0.047    | 2.2E-83   | 0.954    | 3200 Emilsson  | 404.2666365 |
| F7       | rs776905   | 13 | 113781942 | C | A | -1.104  | 0.060305 | 9.164E-65 | 0.112839 | 997 Suhre      | 335.14771   |
| FGL1     | rs7815429  | 8  | 17737357  | T | C | -0.446  | 0.025    | 3.3E-70   | 0.313    | 3200 Emilsson  | 318.2656    |
| TXNDC15  | rs78165052 | 5  | 134250596 | C | T | -0.307  | 0.036    | 3.6E-17   | 0.875    | 3200 Emilsson  | 72.72299383 |
| NPNT     | rs78213340 | 4  | 106819613 | T | C | 0.314   | 0.049    | 1.7E-10   | 0.93     | 3200 Emilsson  | 41.06455643 |
| PLG      | rs783150   | 6  | 161226939 | T | C | -0.5174 | 0.065669 | 8.7E-15   | 0.113568 | 995 Suhre      | 62.07732135 |
| NT5C     | rs78625720 | 17 | 73140941  | A | G | -0.7529 | 0.0719   | 1.2E-25   | 0.029536 | 3301 Sun       | 109.6520647 |
| LRPAP1   | rs78770234 | 4  | 3496683   | A | G | -0.6821 | 0.0688   | 3.6E-23   | 0.032618 | 3301 Sun       | 98.29223778 |
| C1QC     | rs78865058 | 1  | 22944209  | A | G | 1.0754  | 0.0603   | 4.3E-71   | 0.041707 | 3301 Sun       | 318.0573528 |
| MBL2     | rs7899547  | 10 | 54536839  | G | T | 0.9477  | 0.0202   | 1E-200    | 0.65277  | 3301 Sun       | 2201.096192 |
| ACP5     | rs79061565 | 19 | 11698659  | G | C | -0.4845 | 0.0364   | 1.6E-40   | 0.122794 | 3301 Sun       | 177.1678013 |
| ITIH5    | rs7909223  | 10 | 7700709   | G | A | 0.3222  | 0.0286   | 2E-29     | 0.747691 | 3301 Sun       | 126.9167685 |
| PNLIPRP2 | rs7910135  | 10 | 118398046 | C | A | -0.969  | 0.018    | 1E-200    | 0.493    | 3200 Emilsson  | 2898.027778 |
| VWC2     | rs79259707 | 7  | 49812564  | C | A | 0.34    | 0.035    | 1.3E-22   | 0.868    | 3200 Emilsson  | 94.36734694 |
| HPX      | rs7935957  | 11 | 6450200   | A | T | -0.252  | 0.022    | 5.06E-30  | 0.788    | 6861 Yao       | 131.2066116 |
| PDGFD    | rs7950273  | 11 | 104031598 | G | C | -0.2749 | 0.0269   | 1.4E-24   | 0.287969 | 3301 Sun       | 104.4347231 |
| RELT     | rs7952686  | 11 | 73128503  | T | C | 0.4125  | 0.0292   | 3.1E-45   | 0.204256 | 3301 Sun       | 199.5640012 |
| PLXNC1   | rs7972001  | 12 | 94623502  | T | C | -1.005  | 0.122632 | 7.773E-16 | 0.033736 | 993 Suhre      | 67.1621362  |
| REG4     | rs79795228 | 1  | 120359286 | A | C | 0.7938  | 0.0995   | 1.4E-15   | 0.015404 | 3301 Sun       | 63.64672003 |
| CLN5     | rs7996555  | 13 | 77562492  | C | T | 0.35    | 0.055    | 1.5E-10   | 0.946    | 3200 Emilsson  | 40.49586777 |

|           |           |    |           |   |   |         |          |           |          |      |           |             |
|-----------|-----------|----|-----------|---|---|---------|----------|-----------|----------|------|-----------|-------------|
| IGDCC4    | rs8034057 | 15 | 65789430  | G | A | 0.344   | 0.042    | 3.5E-16   | 0.905    | 3200 | Emilsson  | 67.08390023 |
| CTRB1     | rs8051363 | 16 | 75255217  | G | A | 0.6471  | 0.0242   | 1.6E-157  | 0.704343 | 3301 | Sun       | 715.0099208 |
| SHMT1     | rs8067462 | 17 | 18263571  | C | A | -0.3    | 0.025    | 1E-31     | 0.607    | 3200 | Emilsson  | 144         |
| SCARF1    | rs8071756 | 17 | 1574342   | G | A | 0.5897  | 0.049427 | 9.358E-31 | 0.223671 | 997  | Suhre     | 142.3449905 |
| PYY       | rs8074783 | 17 | 42028989  | C | A | 0.157   | 0.026    | 1.2E-09   | 0.641    | 3200 | Emilsson  | 36.46301775 |
| CD300E    | rs8081669 | 17 | 72614611  | G | A | 0.27    | 0.025    | 4.2E-27   | 0.551    | 3200 | Emilsson  | 116.64      |
| APOF      | rs808919  | 12 | 56647911  | C | G | 0.321   | 0.04     | 6.9E-16   | 0.903    | 3200 | Emilsson  | 64.400625   |
| APMAP     | rs8125909 | 20 | 24975835  | C | A | 0.2967  | 0.0363   | 2.8E-16   | 0.132064 | 3301 | Sun       | 66.8069804  |
| ESD       | rs8192888 | 13 | 47362384  | C | G | -0.8063 | 0.0404   | 9.8E-89   | 0.093911 | 3301 | Sun       | 398.3186023 |
| C1QTNF3   | rs840390  | 5  | 34018623  | G | A | 0.203   | 0.037    | 2.8E-08   | 0.868    | 3200 | Emilsson  | 30.10153397 |
| SHBG      | rs858519  | 17 | 7531965   | T | C | -0.214  | 0.024    | 2.3E-18   | 0.474    | 3200 | Emilsson  | 79.50694444 |
| CASP3     | rs870825  | 4  | 185588045 | G | A | -0.3955 | 0.058156 | 1.8E-11   | 0.156784 | 995  | Suhre     | 46.24902438 |
| CHIT1     | rs872583  | 1  | 203184766 | C | T | -1.0982 | 0.0247   | 1E-200    | 0.20154  | 3301 | Sun       | 1976.828402 |
| PATE4     | rs875500  | 11 | 125698654 | A | T | -0.4819 | 0.0262   | 1E-75     | 0.719869 | 3301 | Sun       | 338.3072228 |
| OXT       | rs877172  | 20 | 3049890   | T | G | -0.669  | 0.024    | 5.6E-156  | 0.66     | 3200 | Emilsson  | 777.015625  |
| SPON2     | rs878323  | 4  | 1169813   | T | G | -0.213  | 0.026    | 1.8E-16   | 0.687    | 3200 | Emilsson  | 67.11390533 |
| TNFRSF11A | rs884205  | 18 | 60054857  | C | A | -0.2235 | 0.0292   | 2E-14     | 0.756399 | 3301 | Sun       | 58.5853936  |
| ALDH3A1   | rs887241  | 17 | 19645938  | C | A | 0.2421  | 0.0259   | 7.8E-21   | 0.661635 | 3301 | Sun       | 87.3755758  |
| PLXNA1    | rs891762  | 3  | 126739012 | G | T | -0.182  | 0.027    | 9.6E-12   | 0.318    | 3200 | Emilsson  | 45.43758573 |
| PKDCC     | rs893812  | 2  | 42303114  | C | T | -0.236  | 0.027    | 5.6E-18   | 0.731    | 3200 | Emilsson  | 76.4005487  |
| CST3      | rs911119  | 20 | 23612737  | T | C | 0.393   | 0.022    | 6.66E-73  | 0.779    | 6861 | Yao       | 319.1095041 |
| FAM20A    | rs929477  | 17 | 66655816  | A | G | -0.3717 | 0.0417   | 5.1E-19   | 0.093705 | 3301 | Sun       | 79.4534962  |
| PRSS57    | rs9304936 | 19 | 689590    | G | C | 0.599   | 0.026    | 7.5E-107  | 0.715    | 3200 | Emilsson  | 530.7707101 |
| LGALS3    | rs9323280 | 14 | 55801687  | A | C | 0.77    | 0.046349 | 5.6E-62   | 0.87     | 3394 | Folkersen | 275.9958726 |
| CTGF      | rs9388953 | 6  | 132297509 | G | A | 0.353   | 0.03     | 8.7E-32   | 0.789    | 3200 | Emilsson  | 138.4544444 |
| PF4V1     | rs941758  | 4  | 74718941  | A | C | -0.4937 | 0.0253   | 6.6E-85   | 0.708177 | 3301 | Sun       | 380.7897171 |
| WARS      | rs941923  | 14 | 100813077 | C | T | 0.255   | 0.029    | 6.6E-18   | 0.766    | 3200 | Emilsson  | 77.31866825 |
| GNMT      | rs9471987 | 6  | 42944140  | A | G | 0.4     | 0.024    | 2.4E-61   | 0.402    | 3200 | Emilsson  | 277.7777778 |
| B3GLCT    | rs9544399 | 13 | 31885907  | A | G | 0.278   | 0.031    | 1.6E-19   | 0.791    | 3200 | Emilsson  | 80.42039542 |
| DLL1      | rs959025  | 6  | 170588654 | T | C | 0.1911  | 0.0248   | 1.3E-14   | 0.415638 | 3301 | Sun       | 59.37696735 |
| POSTN     | rs962462  | 13 | 38089171  | A | G | 0.244   | 0.025    | 8.6E-23   | 0.714    | 3200 | Emilsson  | 95.2576     |
| RARRES2   | rs9640161 | 7  | 150045910 | A | C | 0.3473  | 0.041771 | 3.049E-16 | 0.370821 | 987  | Suhre     | 69.12786877 |
| APOA5     | rs964184  | 11 | 116648917 | C | G | 0.2625  | 0.0363   | 4.9E-13   | 0.868979 | 3301 | Sun       | 52.29321768 |
| ST3GAL1   | rs9643300 | 8  | 134503148 | T | C | -0.2571 | 0.0246   | 1.4E-25   | 0.562654 | 3301 | Sun       | 109.2279893 |
| PCOLCE    | rs9801017 | 7  | 100236202 | A | G | 0.2113  | 0.0254   | 1E-16     | 0.635533 | 3301 | Sun       | 69.20405791 |



|         |           |    |           |   |   |         |          |           |          |      |          |             |
|---------|-----------|----|-----------|---|---|---------|----------|-----------|----------|------|----------|-------------|
| RAB6B   | rs9813363 | 3  | 133604743 | G | A | 0.278   | 0.032    | 1.2E-17   | 0.825    | 3200 | Emilsson | 75.47265625 |
| ALCAM   | rs9830049 | 3  | 105284045 | C | T | -0.306  | 0.0374   | 2.8E-16   | 0.120272 | 3301 | Sun      | 66.94214876 |
| DCBLD2  | rs9864010 | 3  | 98678173  | A | G | -0.6199 | 0.0536   | 6.6E-31   | 0.054612 | 3301 | Sun      | 133.7561296 |
| SPATA20 | rs9890200 | 17 | 48624523  | C | A | -0.2532 | 0.0252   | 8.7E-24   | 0.375996 | 3301 | Sun      | 100.9546485 |
| MXRA7   | rs9900613 | 17 | 74674857  | T | C | -0.229  | 0.0247   | 1.9E-20   | 0.430519 | 3301 | Sun      | 85.9561704  |
| CCL14   | rs9903158 | 17 | 34312337  | C | T | -1.0813 | 0.0499   | 3.5E-104  | 0.05615  | 3301 | Sun      | 469.5602387 |
| CCL18   | rs9904601 | 17 | 34372006  | A | G | 0.8634  | 0.059557 | 2.482E-43 | 0.116968 | 996  | Suhre    | 210.1667478 |
| C1QL1   | rs9915692 | 17 | 43034207  | A | G | -0.279  | 0.023    | 3.4E-32   | 0.463    | 3200 | Emilsson | 147.147448  |
| NTRK3   | rs9944243 | 15 | 88514162  | T | G | -0.221  | 0.035    | 5.2E-10   | 0.879    | 3200 | Emilsson | 39.87020408 |
| CHST9   | rs9952639 | 18 | 24709604  | C | G | 0.3331  | 0.0263   | 7.2E-37   | 0.31788  | 3301 | Sun      | 160.4123379 |
| LRRC4C  | rs998447  | 11 | 40310789  | A | C | -0.137  | 0.024    | 2.2E-08   | 0.538    | 3200 | Emilsson | 32.58506944 |
| NAAA    | rs9996608 | 4  | 76848231  | T | C | -0.5485 | 0.0257   | 3.9E-101  | 0.300448 | 3301 | Sun      | 455.4985692 |

**Supplementary Table S2** Instrumental variables for the external validation by MR analysis

| Exposure | SNP        | Chr | Pos       | Effect allele | Other allele | Eaf    | Beta  | Pval        | Se          | Samplesize | F statistics |
|----------|------------|-----|-----------|---------------|--------------|--------|-------|-------------|-------------|------------|--------------|
| UGDH     | rs10008031 | 4   | 39535532  | A             | G            | 0.4274 | -0.3  | 1E-200      | 0.008305036 | 35559      | 1304.77      |
| HAPLN1   | rs10039191 | 5   | 83723226  | G             | C            | 0.3347 | 0.11  | 6.16595E-38 | 0.00854321  | 35559      | 165.77       |
| BTNL8    | rs10068582 | 5   | 181005290 | C             | G            | 0.1126 | 0.17  | 2.95121E-38 | 0.013145191 | 35559      | 167.24       |
| FGL1     | rs10105500 | 8   | 17560162  | T             | A            | 0.0043 | -0.43 | 1.02329E-13 | 0.057812327 | 35559      | 55.32        |
| CPQ      | rs10107707 | 8   | 97025855  | T             | C            | 0.0356 | 0.46  | 9.7724E-99  | 0.021811016 | 35559      | 444.77       |
| DPT      | rs1018454  | 1   | 168728523 | A             | C            | 0.4485 | -0.34 | 1E-200      | 0.008838652 | 35559      | 1479.66      |
| TTL      | rs10194022 | 2   | 112479304 | T             | C            | 0.1591 | 0.08  | 5.12861E-13 | 0.011077499 | 35559      | 52.15        |
| RAB6B    | rs10212397 | 3   | 133888296 | A             | G            | 0.1757 | -0.26 | 9.5499E-135 | 0.010524366 | 35559      | 610.28       |
| ERAP1    | rs1021717  | 5   | 96704191  | T             | G            | 0.0202 | 0.2   | 2.63027E-19 | 0.022263805 | 35559      | 80.69        |
| SHH      | rs10225292 | 7   | 156380544 | C             | T            | 0.348  | -0.09 | 2.18776E-26 | 0.008467514 | 35559      | 112.97       |
| CXCL12   | rs1023264  | 10  | 44398308  | C             | T            | 0.2583 | 0.14  | 7.07946E-54 | 0.009059085 | 35559      | 238.82       |
| GPNMB    | rs10250602 | 7   | 23264082  | C             | T            | 0.3292 | -0.22 | 1.0471E-135 | 0.008873205 | 35559      | 614.7        |
| ASL      | rs10255397 | 7   | 66332421  | C             | T            | 0.3888 | -0.12 | 2.39883E-45 | 0.008491136 | 35559      | 199.71       |
| MAGI2    | rs10260483 | 7   | 79470338  | A             | G            | 0.4991 | 0.23  | 3.2359E-161 | 0.008500849 | 35559      | 731.99       |
| TNFAIP8  | rs1035376  | 5   | 119312555 | G             | A            | 0.1592 | -0.22 | 3.31131E-92 | 0.01080202  | 35559      | 414.77       |
| CILP2    | rs10402308 | 19  | 19546691  | A             | G            | 0.2012 | -0.07 | 2.51189E-10 | 0.011065005 | 35559      | 40.02        |
| ACP5     | rs10403399 | 19  | 11595843  | G             | C            | 0.281  | 0.24  | 5.4954E-140 | 0.009528548 | 35559      | 634.37       |
| PSG5     | rs10403905 | 19  | 43133313  | C             | T            | 0.2996 | 0.43  | 1E-200      | 0.011178295 | 35559      | 1479.66      |
| FBLN1    | rs1040402  | 22  | 45451084  | A             | G            | 0.1909 | -0.16 | 7.94328E-54 | 0.010358214 | 35559      | 238.59       |
| JUND     | rs10406080 | 19  | 18291332  | C             | G            | 0.3487 | 0.06  | 6.76083E-13 | 0.008351676 | 35559      | 51.61        |
| MIA      | rs10407351 | 19  | 40743470  | C             | T            | 0.4846 | 0.06  | 1.47911E-13 | 0.008120153 | 35559      | 54.59        |
| SIGLEC5  | rs10408866 | 19  | 51668879  | T             | C            | 0.1696 | 0.2   | 3.16228E-75 | 0.010897796 | 35559      | 336.79       |
| ELANE    | rs10409474 | 19  | 850733    | G             | C            | 0.1391 | 0.45  | 1E-200      | 0.012334629 | 35559      | 1330.91      |
| ITIH1    | rs1042779  | 3   | 52786995  | G             | A            | 0.3891 | -0.51 | 1E-200      | 0.013257978 | 35559      | 1479.66      |
| SAA1     | rs10430893 | 11  | 18259448  | T             | C            | 0.0694 | -0.75 | 1E-200      | 0.019497026 | 35559      | 891.08       |
| SAA2     | rs10430893 | 11  | 18259448  | T             | C            | 0.0694 | -0.6  | 1E-200      | 0.015795736 | 35559      | 891.08       |
| SAA4     | rs10430893 | 11  | 18259448  | T             | C            | 0.0694 | -0.49 | 8.3176E-196 | 0.016414418 | 35559      | 891.08       |
| EDIL3    | rs10434639 | 5   | 83914528  | G             | A            | 0.353  | -0.06 | 8.51138E-14 | 0.008040565 | 35559      | 55.68        |
| MET      | rs10435378 | 7   | 116785439 | G             | A            | 0.4402 | -0.13 | 3.38844E-55 | 0.008307376 | 35559      | 244.87       |
| HTATIP2  | rs10437608 | 11  | 20364060  | G             | A            | 0.4908 | -0.55 | 1E-200      | 0.014297819 | 35559      | 1479.66      |
| ARHGEF25 | rs10437954 | 12  | 57610139  | G             | A            | 0.1156 | 0.18  | 1.38038E-48 | 0.012288078 | 35559      | 214.56       |
| HDHD3    | rs1043836  | 9   | 113373918 | C             | T            | 0.3704 | -0.18 | 9.7724E-100 | 0.008491001 | 35559      | 449.37       |
| AOC1     | rs10452848 | 7   | 150826456 | G             | A            | 0.4952 | 0.76  | 1E-200      | 0.019756986 | 35559      | 1479.66      |

|          |            |    |             |   |        |       |             |             |       |         |
|----------|------------|----|-------------|---|--------|-------|-------------|-------------|-------|---------|
| LUM      | rs10459147 | 12 | 91015895 T  | C | 0.0302 | -0.18 | 3.38844E-14 | 0.023738735 | 35559 | 57.49   |
| ECHS1    | rs10466126 | 10 | 133373302 A | G | 0.2527 | 0.06  | 9.12011E-11 | 0.00925803  | 35559 | 42      |
| KL       | rs10467359 | 13 | 32955126 G  | A | 0.0403 | -0.32 | 6.91831E-53 | 0.020906144 | 35559 | 234.28  |
| ENPP5    | rs1047153  | 6  | 46161008 C  | T | 0.34   | 0.72  | 1E-200      | 0.018717145 | 35559 | 1479.66 |
| GZMK     | rs10471928 | 5  | 55002903 T  | C | 0.4367 | -0.14 | 1.58489E-69 | 0.007943282 | 35559 | 310.62  |
| TNFSF14  | rs1047286  | 19 | 6713251 A   | G | 0.2407 | -0.07 | 9.54993E-14 | 0.00939978  | 35559 | 55.45   |
| MCEMP1   | rs1047286  | 19 | 6713251 A   | G | 0.2407 | -0.06 | 1.44544E-11 | 0.008884577 | 35559 | 55.45   |
| KLK11    | rs1048328  | 19 | 51024108 A  | G | 0.0643 | -1.48 | 1E-200      | 0.038474131 | 35559 | 1479.66 |
| SNPH     | rs1048621  | 20 | 1312402 A   | G | 0.2525 | -0.07 | 3.23594E-15 | 0.00888161  | 35559 | 62.11   |
| CRNN     | rs10494275 | 1  | 152419091 A | G | 0.0813 | -0.23 | 5.12861E-59 | 0.014198441 | 35559 | 262.39  |
| CFHR4    | rs10494745 | 1  | 196918327 A | G | 0.1648 | -0.97 | 1E-200      | 0.025216153 | 35559 | 1479.66 |
| BDNF     | rs10501089 | 11 | 27767312 T  | C | 0.0706 | 0.16  | 6.16595E-24 | 0.015858515 | 35559 | 101.79  |
| SERPINE1 | rs1050955  | 7  | 101139179 A | G | 0.1872 | -0.07 | 3.31131E-11 | 0.010554859 | 35559 | 43.98   |
| LIPN     | rs10509554 | 10 | 88766035 T  | C | 0.3239 | 0.78  | 1E-200      | 0.020276907 | 35559 | 1479.66 |
| IFIT3    | rs10509571 | 10 | 89332801 A  | T | 0.2638 | -0.09 | 7.4131E-24  | 0.008936446 | 35559 | 101.42  |
| COL6A1   | rs1053312  | 21 | 46003475 A  | G | 0.3526 | -1.23 | 1E-200      | 0.031975122 | 35559 | 1479.66 |
| ABO      | rs1053878  | 9  | 133256264 A | G | 0.0607 | -0.53 | 4.16869E-50 | 0.035608006 | 35559 | 221.53  |
| GDF15    | rs1058587  | 19 | 18388612 G  | C | 0.2426 | 0.45  | 1E-200      | 0.011698215 | 35559 | 1479.66 |
| HNRNPAB  | rs1059367  | 5  | 178209198 T | C | 0.0796 | -0.13 | 5.37032E-18 | 0.015037217 | 35559 | 74.74   |
| APOC1    | rs1064725  | 19 | 44919304 G  | T | 0.07   | -0.1  | 5.01187E-10 | 0.016080448 | 35559 | 38.67   |
| CD46     | rs10746399 | 1  | 207770727 T | C | 0.4526 | 0.24  | 3.1623E-189 | 0.00817983  | 35559 | 860.81  |
| DPP7     | rs10747049 | 9  | 137114298 G | C | 0.2361 | -0.48 | 1E-200      | 0.012478097 | 35559 | 1479.66 |
| MSMP     | rs10758322 | 9  | 35776193 T  | C | 0.4183 | 0.06  | 2.63027E-13 | 0.008205593 | 35559 | 53.46   |
| C10orf54 | rs10762477 | 10 | 71771312 G  | A | 0.1548 | 0.36  | 1E-200      | 0.011069263 | 35559 | 1479.66 |
| CALCB    | rs10766205 | 11 | 15070774 G  | A | 0.2753 | -0.25 | 6.6069E-179 | 0.008765759 | 35559 | 813.35  |
| SAA1     | rs10766463 | 11 | 18230746 G  | A | 0.4535 | 0.07  | 7.24436E-18 | 0.008129163 | 35559 | 57.81   |
| SAA2     | rs10766463 | 11 | 18230746 G  | A | 0.4535 | 0.06  | 2.88403E-14 | 0.007891185 | 35559 | 57.81   |
| FJX1     | rs10768174 | 11 | 36057706 G  | A | 0.405  | 0.18  | 3.0903E-103 | 0.008343021 | 35559 | 465.45  |
| PSMD9    | rs10770186 | 12 | 121923506 A | G | 0.4507 | -0.12 | 1.47911E-48 | 0.008194678 | 35559 | 214.42  |
| PLEKHA1  | rs10788274 | 10 | 122301287 G | A | 0.4337 | 0.28  | 1E-200      | 0.007942153 | 35559 | 1242.84 |
| CXCL12   | rs10793518 | 10 | 44015012 A  | G | 0.2233 | -0.08 | 2.0893E-14  | 0.010464343 | 35559 | 58.44   |
| APOA1BP  | rs10796961 | 1  | 156586529 G | A | 0.0194 | -0.54 | 1.8197E-79  | 0.028608765 | 35559 | 356.26  |
| NUDT2    | rs10814104 | 9  | 34360289 T  | C | 0.2089 | -0.3  | 1E-200      | 0.009748812 | 35559 | 946.92  |
| ROR2     | rs10820918 | 9  | 91924171 G  | A | 0.3138 | 0.15  | 9.54993E-67 | 0.00869104  | 35559 | 297.86  |
| HEBP1    | rs10845710 | 12 | 13182736 A  | G | 0.3947 | -0.07 | 1.09648E-15 | 0.008733028 | 35559 | 64.25   |

|          |            |    |           |   |   |        |       |             |             |       |         |
|----------|------------|----|-----------|---|---|--------|-------|-------------|-------------|-------|---------|
| QSOX2    | rs10858248 | 9  | 136216478 | A | G | 0.4643 | 0.34  | 1E-200      | 0.008838652 | 35559 | 1479.66 |
| OLFM1    | rs10858334 | 9  | 135097939 | G | C | 0.1244 | 0.14  | 2.18776E-31 | 0.012012979 | 35559 | 135.81  |
| CR1      | rs10863341 | 1  | 207499739 | A | T | 0.26   | -0.2  | 1.04713E-94 | 0.00968682  | 35559 | 426.26  |
| COL2A1   | rs10875723 | 12 | 48023754  | G | A | 0.3488 | -0.7  | 1E-200      | 0.018197224 | 35559 | 1479.66 |
| PPP1R1A  | rs10876568 | 12 | 54590778  | C | G | 0.1877 | 0.06  | 3.98107E-10 | 0.009592682 | 35559 | 39.12   |
| CNTN1    | rs10879122 | 12 | 40745433  | T | C | 0.1517 | -0.14 | 5.7544E-13  | 0.019427773 | 35559 | 51.93   |
| RBP4     | rs10882283 | 10 | 93601207  | C | A | 0.3575 | -0.08 | 2.29087E-22 | 0.008223697 | 35559 | 94.63   |
| FAM213A  | rs10887871 | 10 | 80436305  | G | A | 0.4421 | -0.09 | 4.57088E-32 | 0.007635723 | 35559 | 138.92  |
| ANGPTL3  | rs10889352 | 1  | 62633352  | C | T | 0.3377 | -0.24 | 6.0256E-175 | 0.008510959 | 35559 | 795.14  |
| CNTN5    | rs10892747 | 11 | 99065109  | A | G | 0.308  | 0.13  | 1.04713E-52 | 0.008508122 | 35559 | 233.45  |
| CXCL12   | rs10900029 | 10 | 44366772  | A | G | 0.2198 | -0.07 | 1.94984E-11 | 0.01043261  | 35559 | 45.02   |
| CHST15   | rs10901820 | 10 | 124286364 | G | C | 0.3904 | -0.07 | 6.60693E-18 | 0.008119215 | 35559 | 74.33   |
| TSTD1    | rs10908821 | 1  | 161038745 | G | C | 0.1026 | 0.49  | 1E-200      | 0.013271404 | 35559 | 1363.12 |
| CFHR3    | rs10922098 | 1  | 196695521 | C | T | 0.4001 | 0.11  | 1.1749E-41  | 0.008135464 | 35559 | 182.81  |
| OSMR     | rs10941412 | 5  | 38919056  | A | G | 0.1948 | -0.16 | 6.0256E-50  | 0.010767427 | 35559 | 220.8   |
| CNTFR    | rs10972159 | 9  | 34593088  | A | G | 0.0311 | -0.56 | 8.3176E-125 | 0.02356734  | 35559 | 564.59  |
| CCL21    | rs10972211 | 9  | 34729993  | A | G | 0.1471 | 0.15  | 1.8197E-40  | 0.011262971 | 35559 | 177.36  |
| GSN      | rs10985196 | 9  | 121270766 | A | C | 0.2054 | -0.14 | 7.94328E-48 | 0.009635936 | 35559 | 211.08  |
| VPS26A   | rs10998638 | 10 | 69201349  | C | G | 0.2382 | -0.18 | 2.45471E-84 | 0.009250314 | 35559 | 378.62  |
| DKK3     | rs11022114 | 11 | 12017327  | A | G | 0.3333 | 0.33  | 1E-200      | 0.008654183 | 35559 | 1453.96 |
| MPPED2   | rs11031140 | 11 | 30586586  | A | G | 0.1785 | -0.16 | 2.5704E-53  | 0.010409358 | 35559 | 236.25  |
| RRM1     | rs11031142 | 11 | 4153145   | C | T | 0.4383 | 0.06  | 1.20226E-11 | 0.008849637 | 35559 | 45.96   |
| PTHLH    | rs11049365 | 12 | 28138401  | A | C | 0.2706 | 0.12  | 7.24436E-43 | 0.008743498 | 35559 | 188.35  |
| NTF3     | rs11063675 | 12 | 5437300   | T | C | 0.0112 | -0.3  | 1.07152E-14 | 0.038807482 | 35559 | 59.76   |
| RGMA     | rs11074135 | 15 | 93066231  | T | A | 0.3231 | -0.17 | 4.36516E-86 | 0.008645127 | 35559 | 386.66  |
| SERPINF2 | rs11078596 | 17 | 1714968   | T | C | 0.2182 | -0.17 | 1.51356E-68 | 0.009716022 | 35559 | 306.12  |
| STX8     | rs11078801 | 17 | 9433928   | C | G | 0.2115 | 0.07  | 2.29087E-12 | 0.00997787  | 35559 | 49.21   |
| WFIKKN2  | rs11079936 | 17 | 50830473  | T | C | 0.2897 | 0.53  | 1E-200      | 0.013777898 | 35559 | 1479.66 |
| C3       | rs11085197 | 19 | 6713164   | C | G | 0.2405 | -0.1  | 6.45654E-28 | 0.00913025  | 35559 | 119.95  |
| DNAJB1   | rs11085896 | 19 | 14541074  | A | C | 0.4155 | 0.05  | 1.86209E-10 | 0.007846455 | 35559 | 40.6    |
| WISP2    | rs11086936 | 20 | 44703166  | G | C | 0.3357 | 0.23  | 1.1749E-147 | 0.008887822 | 35559 | 669.64  |
| OLFM1    | rs11103524 | 9  | 134779725 | T | C | 0.165  | -0.08 | 3.0903E-13  | 0.01097333  | 35559 | 53.15   |
| FCN2     | rs11103563 | 9  | 134886852 | G | A | 0.0991 | -0.66 | 1E-200      | 0.017157383 | 35559 | 1479.66 |
| FCN1     | rs11103571 | 9  | 134905553 | A | G | 0.2458 | 0.3   | 1E-200      | 0.009496137 | 35559 | 997.99  |
| NRK1     | rs11144225 | 9  | 75092384  | T | A | 0.3712 | -0.16 | 2.88403E-79 | 0.008487619 | 35559 | 355.34  |

|          |             |    |           |   |   |        |       |             |             |       |         |
|----------|-------------|----|-----------|---|---|--------|-------|-------------|-------------|-------|---------|
| PTPN9    | rs111647176 | 15 | 75459420  | A | G | 0.2739 | -0.07 | 1.62181E-15 | 0.008785914 | 35559 | 63.47   |
| LRIG3    | rs11172841  | 12 | 58958650  | C | A | 0.2331 | 0.28  | 7.7625E-135 | 0.011330092 | 35559 | 610.7   |
| CDKN1B   | rs111909987 | 12 | 12699174  | G | C | 0.0993 | 0.12  | 1.41254E-19 | 0.013257739 | 35559 | 81.92   |
| LTBP4    | rs112009052 | 19 | 40593595  | A | T | 0.016  | -0.25 | 3.23594E-14 | 0.032944524 | 35559 | 57.58   |
| VWA1     | rs112030392 | 1  | 1425135   | C | T | 0.066  | 0.12  | 2.88403E-13 | 0.016439024 | 35559 | 53.28   |
| GPX7     | rs11205979  | 1  | 52610744  | T | C | 0.1349 | 0.71  | 1E-200      | 0.018457184 | 35559 | 1479.66 |
| CADM1    | rs11215406  | 11 | 115194362 | C | T | 0.3163 | 0.15  | 1.14815E-68 | 0.008565259 | 35559 | 306.67  |
| UBASH3B  | rs11218735  | 11 | 122652542 | A | G | 0.2852 | -0.13 | 3.46737E-49 | 0.008818385 | 35559 | 217.31  |
| LILRA6   | rs112312277 | 19 | 54202976  | T | G | 0.0663 | 0.56  | 1E-200      | 0.016361612 | 35559 | 1171.38 |
| FAM171B  | rs1123176   | 2  | 186742744 | C | T | 0.1566 | -0.19 | 8.70964E-67 | 0.01100526  | 35559 | 298.05  |
| MAN1C1   | rs11247595  | 1  | 25682168  | T | C | 0.4547 | 0.19  | 2.7542E-117 | 0.008252681 | 35559 | 530.02  |
| NAGLU    | rs112629880 | 17 | 42463743  | T | C | 0.0365 | 1.32  | 1E-200      | 0.034314765 | 35559 | 1479.66 |
| HDGF     | rs11264535  | 1  | 156752632 | C | G | 0.2921 | -0.08 | 3.89045E-18 | 0.009214521 | 35559 | 75.37   |
| GPC1     | rs1126920   | 2  | 240466062 | T | C | 0.0983 | 0.63  | 1E-200      | 0.016377502 | 35559 | 1479.66 |
| ASPH     | rs112800350 | 8  | 61779251  | T | C | 0.0357 | -0.24 | 1.38038E-30 | 0.020876676 | 35559 | 132.15  |
| LILRB1   | rs112988186 | 19 | 54637391  | C | T | 0.0578 | 0.53  | 1E-200      | 0.015791368 | 35559 | 1126.39 |
| SFTPB    | rs1130866   | 2  | 85666618  | A | G | 0.4792 | -0.4  | 1E-200      | 0.010398414 | 35559 | 1479.66 |
| MST1     | rs1131095   | 3  | 49676792  | C | T | 0.3076 | -1.23 | 1E-200      | 0.031975122 | 35559 | 1479.66 |
| SDSL     | rs113152874 | 12 | 113429268 | C | G | 0.0175 | 0.78  | 4.2658E-147 | 0.030199429 | 35559 | 667.06  |
| CCL4L1   | rs113308217 | 17 | 36467153  | C | T | 0.0278 | -0.15 | 1.44544E-09 | 0.024792011 | 35559 | 36.6    |
| AIF1L    | rs113409341 | 9  | 131059144 | C | T | 0.3038 | 0.54  | 1E-200      | 0.014037859 | 35559 | 1479.66 |
| TP53I3   | rs1134516   | 2  | 24119662  | A | G | 0.1212 | -0.53 | 1E-200      | 0.013777898 | 35559 | 1479.66 |
| TNFSF13B | rs113469631 | 13 | 108261424 | G | T | 0.0266 | -0.19 | 2.81838E-14 | 0.024978968 | 35559 | 57.85   |
| KLRB1    | rs1135816   | 12 | 9598073   | G | A | 0.3782 | -0.23 | 5.3703E-177 | 0.008108405 | 35559 | 804.56  |
| DCXR     | rs113680823 | 17 | 82037444  | G | A | 0.1779 | 0.12  | 4.67735E-28 | 0.010927213 | 35559 | 120.59  |
| CHIT1    | rs113689597 | 1  | 203230276 | C | T | 0.0625 | 0.85  | 1E-200      | 0.022096629 | 35559 | 1479.66 |
| ENTPD5   | rs113768127 | 14 | 74001136  | C | T | 0.0547 | -0.91 | 1E-200      | 0.023656391 | 35559 | 1479.66 |
| TNC      | rs1138545   | 9  | 115073620 | T | C | 0.1731 | 1.19  | 1E-200      | 0.030935281 | 35559 | 1479.66 |
| CCL4L1   | rs113877493 | 17 | 36443746  | T | C | 0.0853 | -0.13 | 1.99526E-17 | 0.015304797 | 35559 | 72.15   |
| GPC5     | rs114196736 | 13 | 91445191  | T | C | 0.0265 | 0.36  | 2.95121E-48 | 0.024663245 | 35559 | 213.05  |
| CBLN1    | rs114398277 | 16 | 49461811  | A | G | 0.0331 | -0.43 | 1.51356E-72 | 0.023870355 | 35559 | 324.49  |
| STAMBPL1 | rs1147604   | 10 | 88860435  | A | G | 0.4917 | 0.1   | 7.24436E-39 | 0.007668703 | 35559 | 170.03  |
| FSTL1    | rs1147707   | 3  | 120450401 | T | C | 0.3745 | -0.15 | 1.58489E-70 | 0.008448463 | 35559 | 315.21  |
| FCGR2A   | rs115264949 | 1  | 161532142 | A | G | 0.0259 | 0.16  | 9.54993E-13 | 0.022418878 | 35559 | 50.93   |
| ADAMTSL2 | rs11534419  | 9  | 133523101 | T | C | 0.3929 | 0.11  | 1.1749E-37  | 0.008576429 | 35559 | 164.49  |

|          |             |    |           |   |   |        |       |             |             |       |         |
|----------|-------------|----|-----------|---|---|--------|-------|-------------|-------------|-------|---------|
| AES      | rs11539938  | 19 | 3062859   | C | T | 0.4359 | -0.05 | 5.37032E-11 | 0.007621614 | 35559 | 43.03   |
| DCI      | rs11541763  | 16 | 2251519   | C | G | 0.1648 | -0.19 | 4.36516E-70 | 0.010735837 | 35559 | 313.19  |
| WVOX     | rs11545029  | 16 | 78386878  | G | A | 0.3826 | 0.07  | 6.30957E-18 | 0.008114254 | 35559 | 74.42   |
| RFK      | rs11548955  | 9  | 76394450  | A | G | 0.2622 | -0.06 | 2.04174E-11 | 0.008951207 | 35559 | 44.93   |
| VWA1     | rs115503338 | 1  | 1434243   | A | G | 0.0239 | -1.24 | 1E-200      | 0.032235083 | 35559 | 1479.66 |
| TSSC4    | rs11555995  | 11 | 2402315   | G | A | 0.1251 | 0.08  | 8.51138E-11 | 0.012324238 | 35559 | 42.13   |
| CHI3L2   | rs11556868  | 1  | 111235703 | T | C | 0.1316 | 0.09  | 2.13796E-13 | 0.012261792 | 35559 | 53.87   |
| NMRAL1   | rs11557236  | 16 | 4469438   | A | G | 0.1018 | -0.87 | 1E-200      | 0.02261655  | 35559 | 1479.66 |
| CCT5     | rs11557652  | 5  | 10256060  | T | A | 0.0339 | -0.15 | 1.20226E-11 | 0.022124092 | 35559 | 45.96   |
| PLXNC1   | rs115651556 | 12 | 94220122  | A | G | 0.0148 | -2.04 | 1E-200      | 0.05303191  | 35559 | 1479.66 |
| NTNG1    | rs115668827 | 1  | 107135646 | C | G | 0.0672 | 1.32  | 1E-200      | 0.034314765 | 35559 | 1479.66 |
| MMP7     | rs11568819  | 11 | 102530902 | A | G | 0.0663 | 0.57  | 1E-200      | 0.016841031 | 35559 | 1145.48 |
| TNFRSF17 | rs11570136  | 16 | 11964975  | A | T | 0.3544 | -0.13 | 1.77828E-53 | 0.008444501 | 35559 | 236.98  |
| PLA2G2A  | rs11573156  | 1  | 19979653  | C | G | 0.2561 | 0.77  | 1E-200      | 0.020016946 | 35559 | 1479.66 |
| PKLR     | rs115736167 | 1  | 155296818 | G | C | 0.0159 | -0.21 | 1.12202E-09 | 0.034477051 | 35559 | 37.1    |
| ITLN1    | rs11578752  | 1  | 160875699 | C | T | 0.345  | 0.08  | 1.07152E-17 | 0.00933926  | 35559 | 73.37   |
| SLAMF7   | rs11581248  | 1  | 160750284 | T | C | 0.1271 | -1.27 | 1E-200      | 0.033014964 | 35559 | 1479.66 |
| FCRL4    | rs11582663  | 1  | 157589332 | T | C | 0.1715 | -1.13 | 1E-200      | 0.029375519 | 35559 | 1479.66 |
| RPS6KA1  | rs11589734  | 1  | 26534508  | G | A | 0.4519 | -0.1  | 4.2658E-54  | 0.00645715  | 35559 | 239.82  |
| PCSK9    | rs11591147  | 1  | 55039974  | T | G | 0.0121 | -0.89 | 3.9811E-117 | 0.038684141 | 35559 | 529.29  |
| DKK1     | rs1159798   | 10 | 52652733  | A | C | 0.211  | -0.06 | 1.51356E-10 | 0.009369141 | 35559 | 41.01   |
| LYVE1    | rs116055980 | 11 | 10597218  | G | A | 0.0491 | 0.42  | 5.1286E-106 | 0.019205281 | 35559 | 478.23  |
| SERPING1 | rs11606706  | 11 | 57616102  | T | G | 0.2421 | -0.68 | 1E-200      | 0.017677303 | 35559 | 1479.66 |
| GREM2    | rs116135446 | 1  | 240794633 | T | C | 0.0367 | 0.14  | 5.49541E-11 | 0.021351697 | 35559 | 42.99   |
| NMB      | rs11633788  | 15 | 84761911  | A | T | 0.3321 | -0.14 | 4.16869E-61 | 0.008488817 | 35559 | 271.98  |
| STARD5   | rs11634869  | 15 | 81274272  | T | A | 0.2487 | -0.21 | 1.9953E-116 | 0.009155588 | 35559 | 526.07  |
| DCTPP1   | rs11640950  | 16 | 30414680  | A | T | 0.2357 | -0.06 | 6.91831E-10 | 0.009727713 | 35559 | 38.04   |
| HYAL1    | rs116482870 | 3  | 50302191  | T | C | 0.0477 | -0.24 | 1.44544E-36 | 0.019002593 | 35559 | 159.5   |
| CDH5     | rs11649312  | 16 | 66395395  | G | A | 0.3145 | -0.15 | 2.75423E-69 | 0.008525791 | 35559 | 309.52  |
| COL6A3   | rs11677932  | 2  | 237315312 | A | G | 0.2936 | -0.07 | 1.51356E-14 | 0.009107017 | 35559 | 59.08   |
| IL20RA   | rs1167852   | 6  | 137017711 | A | T | 0.2638 | 0.06  | 6.0256E-12  | 0.008722143 | 35559 | 47.32   |
| NAGK     | rs11680831  | 2  | 71065392  | C | T | 0.3755 | -0.17 | 2.63027E-96 | 0.008163706 | 35559 | 433.61  |
| INHBB    | rs11682902  | 2  | 120461280 | A | G | 0.0952 | 0.08  | 1.38038E-09 | 0.013206223 | 35559 | 36.69   |
| CEL      | rs116842520 | 9  | 133078678 | A | G | 0.0588 | 0.21  | 2.69153E-32 | 0.017749627 | 35559 | 139.97  |
| MMAB     | rs116869611 | 12 | 109446591 | T | C | 0.1052 | 0.09  | 2.5704E-13  | 0.012303186 | 35559 | 53.51   |

|          |             |    |             |   |        |       |             |             |       |         |
|----------|-------------|----|-------------|---|--------|-------|-------------|-------------|-------|---------|
| TXNL4B   | rs116891509 | 16 | 72071661 T  | C | 0.0759 | 0.25  | 2.63027E-60 | 0.015261933 | 35559 | 268.31  |
| CLEC11A  | rs116924815 | 19 | 50727476 T  | C | 0.0264 | 0.94  | 1E-200      | 0.024941518 | 35559 | 1479.66 |
| PTEN     | rs117002784 | 10 | 88147290 T  | C | 0.0383 | 0.13  | 2.88403E-10 | 0.020618924 | 35559 | 39.75   |
| CBR3     | rs11702672  | 21 | 36157012 A  | G | 0.1442 | 0.31  | 1.7783E-155 | 0.011670008 | 35559 | 705.6   |
| RETN     | rs117029024 | 19 | 7613602 A   | G | 0.0332 | -0.59 | 3.1623E-138 | 0.023575188 | 35559 | 626.28  |
| VOPP1    | rs117042408 | 7  | 55555698 A  | G | 0.02   | -0.29 | 4.2658E-23  | 0.029300168 | 35559 | 97.96   |
| POLI     | rs117050326 | 18 | 54237200 C  | G | 0.0172 | -0.27 | 1.07152E-17 | 0.031520002 | 35559 | 73.37   |
| TCN2     | rs117051272 | 22 | 30609233 A  | G | 0.0175 | -0.48 | 3.01995E-40 | 0.036144309 | 35559 | 176.35  |
| PCDH9    | rs117087958 | 13 | 67231160 A  | C | 0.0817 | -0.27 | 2.81838E-70 | 0.015234992 | 35559 | 314.06  |
| TDGF1    | rs11710264  | 3  | 46620089 C  | T | 0.4776 | -0.14 | 2.6915E-109 | 0.006303196 | 35559 | 493.3   |
| KIAA1467 | rs117172138 | 12 | 13040880 T  | C | 0.0201 | 0.52  | 1.12202E-78 | 0.027690526 | 35559 | 352.63  |
| KLK14    | rs117229324 | 19 | 51082721 T  | C | 0.0258 | -0.59 | 1.9055E-103 | 0.027318267 | 35559 | 466.42  |
| SPON2    | rs11731643  | 4  | 1169862 C   | T | 0.1636 | 0.13  | 3.63078E-24 | 0.012819153 | 35559 | 102.84  |
| PSG7     | rs117338918 | 19 | 42873169 G  | C | 0.0075 | 0.3   | 5.88844E-11 | 0.045825716 | 35559 | 42.85   |
| ENPEP    | rs11735606  | 4  | 110517862 G | C | 0.2888 | 0.4   | 1E-200      | 0.010398414 | 35559 | 1479.66 |
| CA10     | rs117399000 | 17 | 52136371 A  | G | 0.0268 | -0.56 | 6.6069E-106 | 0.025620586 | 35559 | 477.72  |
| C6       | rs11741451  | 5  | 40997357 G  | A | 0.3277 | -0.06 | 1.1749E-12  | 0.008440849 | 35559 | 50.52   |
| ARSB     | rs11743362  | 5  | 78880898 A  | G | 0.4951 | -0.13 | 5.37032E-62 | 0.007823956 | 35559 | 276.06  |
| GNPDA1   | rs11745713  | 5  | 142084639 G | C | 0.1535 | -0.07 | 0.000000001 | 0.011457734 | 35559 | 37.32   |
| PLG      | rs11751347  | 6  | 160671406 T | C | 0.0795 | -0.36 | 9.5499E-125 | 0.015154135 | 35559 | 564.31  |
| OAF      | rs117554512 | 11 | 120227620 T | C | 0.091  | 0.2   | 1.38038E-26 | 0.018741111 | 35559 | 113.88  |
| MMP8     | rs117557731 | 11 | 102676761 G | A | 0.0452 | 0.26  | 5.01187E-40 | 0.019634329 | 35559 | 175.34  |
| ELMO1    | rs11767227  | 7  | 37433195 G  | C | 0.2701 | -0.07 | 5.12861E-16 | 0.008633011 | 35559 | 65.74   |
| CTSV     | rs117724680 | 9  | 97144183 C  | T | 0.0484 | 0.27  | 5.62341E-47 | 0.018757494 | 35559 | 207.18  |
| B4GALT6  | rs117750096 | 18 | 31624513 G  | T | 0.0376 | -1.1  | 1E-200      | 0.028595638 | 35559 | 1479.66 |
| ENG      | rs11794565  | 9  | 127838998 T | C | 0.4398 | 0.15  | 1.04713E-73 | 0.008259367 | 35559 | 329.81  |
| SEZ6L    | rs117966464 | 22 | 26168192 T  | G | 0.0495 | -0.17 | 5.01187E-20 | 0.018551332 | 35559 | 83.97   |
| SIGLEC5  | rs118005510 | 19 | 51638568 A  | G | 0.0084 | 0.98  | 2.6915E-132 | 0.040039977 | 35559 | 599.02  |
| LGALS3   | rs118083722 | 14 | 55129494 A  | G | 0.0889 | -0.57 | 1E-200      | 0.01481774  | 35559 | 1479.66 |
| TALDO1   | rs118104171 | 11 | 776914 A    | G | 0.0452 | 0.12  | 6.16595E-11 | 0.018349582 | 35559 | 42.76   |
| FAM3B    | rs118132670 | 21 | 41346912 A  | C | 0.0529 | -0.26 | 2.95121E-47 | 0.018007092 | 35559 | 208.47  |
| TAGLN    | rs11826038  | 11 | 116964682 G | A | 0.0219 | 0.2   | 8.51138E-13 | 0.027961635 | 35559 | 51.16   |
| C1QTNF9  | rs11840418  | 13 | 24359488 T  | C | 0.2944 | -0.21 | 3.4674E-128 | 0.008718598 | 35559 | 580.12  |
| MDGA2    | rs11846619  | 14 | 48400311 A  | G | 0.0412 | 0.77  | 1E-200      | 0.020016946 | 35559 | 1479.66 |
| GNPTG    | rs11865211  | 16 | 1352492 T   | C | 0.0193 | -0.18 | 1.77828E-09 | 0.029915914 | 35559 | 36.2    |

|          |            |    |           |   |   |        |       |             |             |       |         |
|----------|------------|----|-----------|---|---|--------|-------|-------------|-------------|-------|---------|
| SPINK2   | rs11941268 | 4  | 56823077  | T | C | 0.0261 | 0.81  | 1E-200      | 0.025330853 | 35559 | 1022.46 |
| CMBL     | rs11948322 | 5  | 10306334  | C | T | 0.4095 | -0.18 | 2.9512E-101 | 0.008425776 | 35559 | 456.35  |
| VEGFA    | rs11965885 | 6  | 43725357  | G | T | 0.4253 | 0.07  | 7.24436E-19 | 0.007890814 | 35559 | 78.69   |
| EGFR     | rs11977388 | 7  | 55164553  | C | T | 0.2355 | 0.09  | 1.94984E-20 | 0.009713924 | 35559 | 85.84   |
| TAC1     | rs11977936 | 7  | 97479644  | C | T | 0.0139 | 0.34  | 6.16595E-23 | 0.034480545 | 35559 | 97.23   |
| PRDX1    | rs12047498 | 1  | 45488960  | T | C | 0.2258 | 0.1   | 6.91831E-26 | 0.009504858 | 35559 | 110.68  |
| EPHA10   | rs12074120 | 1  | 37731729  | G | T | 0.2725 | 0.08  | 1.12202E-18 | 0.009068001 | 35559 | 77.83   |
| GALNT16  | rs12100668 | 14 | 69326758  | G | A | 0.4077 | -0.17 | 7.24436E-91 | 0.008409653 | 35559 | 408.62  |
| CD36     | rs12113010 | 7  | 80590764  | A | G | 0.0579 | 0.25  | 3.16228E-44 | 0.017921618 | 35559 | 194.58  |
| IL6R     | rs12126142 | 1  | 154452980 | A | G | 0.4148 | 1.01  | 1E-200      | 0.026255995 | 35559 | 1479.66 |
| SLAMF6   | rs12137007 | 1  | 160493616 | G | A | 0.1765 | -0.21 | 2.34423E-91 | 0.0103599   | 35559 | 410.87  |
| CHI3L1   | rs12141494 | 1  | 203182297 | G | A | 0.4428 | 1     | 1E-200      | 0.025996034 | 35559 | 1479.66 |
| THBS2    | rs12174547 | 6  | 169224627 | T | C | 0.2077 | -0.22 | 9.7724E-111 | 0.009839243 | 35559 | 499.92  |
| PREP     | rs12192369 | 6  | 105329503 | G | A | 0.1404 | -0.21 | 8.51138E-77 | 0.011322157 | 35559 | 344     |
| PPIL1    | rs12194408 | 6  | 36871822  | G | C | 0.0414 | -1.32 | 1E-200      | 0.034314765 | 35559 | 1479.66 |
| KLB      | rs12233688 | 4  | 39411290  | T | C | 0.3676 | 0.06  | 1.1749E-13  | 0.008086708 | 35559 | 55.05   |
| ASRGL1   | rs12275541 | 11 | 62322339  | A | G | 0.3159 | -0.21 | 5.1286E-132 | 0.008589229 | 35559 | 597.73  |
| THYN1    | rs12278812 | 11 | 134252402 | C | A | 0.2078 | -0.06 | 1.12202E-10 | 0.009303012 | 35559 | 41.59   |
| RELT     | rs12293998 | 11 | 73302315  | G | T | 0.288  | 0.06  | 1.1749E-11  | 0.008845298 | 35559 | 46.01   |
| ATP1B2   | rs12325768 | 17 | 7645550   | A | G | 0.3335 | -0.18 | 1.65959E-26 | 0.016894113 | 35559 | 113.51  |
| ALPPL2   | rs12328730 | 2  | 232386656 | T | C | 0.3556 | 0.05  | 1.07152E-10 | 0.007744133 | 35559 | 41.68   |
| QSOX2    | rs12338076 | 9  | 136229894 | C | A | 0.3381 | -0.09 | 9.54993E-18 | 0.010490436 | 35559 | 73.6    |
| SFTPD    | rs12357764 | 10 | 79995964  | A | C | 0.3518 | 0.53  | 1E-200      | 0.013777898 | 35559 | 1479.66 |
| CDHR5    | rs12360820 | 11 | 620927    | A | C | 0.1777 | -0.07 | 2.5704E-11  | 0.010495866 | 35559 | 44.48   |
| MANSC4   | rs12370269 | 12 | 27771725  | G | A | 0.217  | 0.57  | 1E-200      | 0.01481774  | 35559 | 1479.66 |
| BPNT1    | rs12404566 | 1  | 220200137 | A | T | 0.197  | 0.06  | 1.07152E-10 | 0.00929296  | 35559 | 41.68   |
| IGSF8    | rs12408242 | 1  | 160092144 | C | T | 0.1798 | 0.16  | 7.24436E-56 | 0.010160906 | 35559 | 247.94  |
| INHBC    | rs12423654 | 12 | 57444367  | T | C | 0.4645 | -0.06 | 6.76083E-13 | 0.008351676 | 35559 | 51.61   |
| SERPINA1 | rs1243167  | 14 | 94375304  | A | G | 0.2699 | 0.41  | 1E-200      | 0.010658374 | 35559 | 1479.66 |
| ACAN     | rs12441312 | 15 | 88710195  | C | G | 0.2058 | 0.09  | 4.0738E-21  | 0.009543305 | 35559 | 88.93   |
| PLCG2    | rs12445050 | 16 | 81837364  | T | C | 0.1003 | 0.18  | 1.31826E-43 | 0.012998792 | 35559 | 191.74  |
| C1QL1    | rs12452548 | 17 | 44811682  | T | C | 0.2224 | -0.09 | 1.90546E-14 | 0.011754178 | 35559 | 58.62   |
| SPOCK2   | rs1245548  | 10 | 72086126  | A | G | 0.4586 | 0.19  | 1.0233E-116 | 0.008273153 | 35559 | 527.4   |
| CD33     | rs12459419 | 19 | 51225221  | T | C | 0.3497 | -1.08 | 1E-200      | 0.028075717 | 35559 | 1479.66 |
| CEACAM8  | rs12459454 | 19 | 41759235  | G | A | 0.3212 | -0.07 | 5.01187E-17 | 0.008346831 | 35559 | 70.33   |



|          |            |    |           |   |   |        |       |             |             |       |         |
|----------|------------|----|-----------|---|---|--------|-------|-------------|-------------|-------|---------|
| IGFLR1   | rs12459634 | 19 | 35739273  | C | T | 0.1415 | -0.63 | 1E-200      | 0.016377502 | 35559 | 1479.66 |
| LILRA6   | rs12460589 | 19 | 54298694  | T | C | 0.0147 | 0.28  | 1.34896E-20 | 0.03009366  | 35559 | 86.56   |
| KYNU     | rs12477146 | 2  | 143036245 | A | G | 0.2079 | -0.46 | 1E-200      | 0.011958176 | 35559 | 1479.66 |
| ALPPL2   | rs12478529 | 2  | 232421944 | T | C | 0.224  | 0.2   | 1.65959E-92 | 0.009803744 | 35559 | 416.15  |
| SIRPB1   | rs12480515 | 20 | 1558519   | T | C | 0.2501 | 0.92  | 1E-200      | 0.023916352 | 35559 | 1479.66 |
| FAM3D    | rs12493131 | 3  | 58664251  | T | G | 0.0747 | -0.45 | 2.4547E-197 | 0.015015287 | 35559 | 898.12  |
| ROBO1    | rs12495133 | 3  | 78872370  | A | C | 0.4088 | 0.1   | 1.65959E-27 | 0.00920236  | 35559 | 118.08  |
| FN1      | rs1250258  | 2  | 215435462 | C | T | 0.3266 | -0.18 | 2.138E-102  | 0.008377831 | 35559 | 461.59  |
| FN1      | rs1250259  | 2  | 215435759 | T | A | 0.3267 | -0.16 | 6.30957E-81 | 0.008398016 | 35559 | 362.96  |
| LEAP2    | rs12515756 | 5  | 132903188 | C | T | 0.1644 | 0.4   | 1E-200      | 0.010853602 | 35559 | 1358.15 |
| UST      | rs12527307 | 6  | 148933158 | C | A | 0.0887 | -0.11 | 2.29087E-13 | 0.015005548 | 35559 | 53.73   |
| GFRAL    | rs12529201 | 6  | 55401924  | C | T | 0.2648 | 0.14  | 5.88844E-55 | 0.008966581 | 35559 | 243.77  |
| ZYX      | rs12539742 | 7  | 143490004 | A | G | 0.2932 | 0.08  | 8.51138E-19 | 0.009036373 | 35559 | 78.37   |
| GSTP1    | rs1254123  | 11 | 67567341  | C | T | 0.4694 | -0.13 | 1.41254E-56 | 0.008202048 | 35559 | 251.2   |
| SCARA5   | rs12548086 | 8  | 27862269  | C | G | 0.131  | 0.14  | 1.28825E-32 | 0.011771711 | 35559 | 141.43  |
| GCLM     | rs12563495 | 1  | 93919068  | A | G | 0.4367 | -0.08 | 1.04713E-25 | 0.007632265 | 35559 | 109.86  |
| HOMER2   | rs1256430  | 15 | 82850720  | A | G | 0.1645 | -0.09 | 3.38844E-16 | 0.011031263 | 35559 | 66.56   |
| FJX1     | rs12574547 | 11 | 36151539  | G | A | 0.3242 | 0.11  | 6.91831E-35 | 0.008927309 | 35559 | 151.82  |
| MDGA2    | rs12589514 | 14 | 47621214  | G | A | 0.2419 | -0.1  | 7.94328E-25 | 0.009719623 | 35559 | 105.85  |
| NAGPA    | rs12599777 | 16 | 5029465   | G | A | 0.1822 | -0.48 | 1E-200      | 0.012478097 | 35559 | 1479.66 |
| CNP      | rs12602950 | 17 | 41971811  | G | A | 0.2969 | -0.08 | 1.12202E-19 | 0.008814045 | 35559 | 82.38   |
| GCKR     | rs1260326  | 2  | 27508073  | T | C | 0.3413 | -0.09 | 5.7544E-25  | 0.008721384 | 35559 | 106.49  |
| RAB31    | rs12607866 | 18 | 9696477   | C | T | 0.2985 | 0.13  | 6.91831E-47 | 0.00904039  | 35559 | 206.77  |
| NPTXR    | rs12628473 | 22 | 38844712  | G | A | 0.0149 | 1.55  | 1E-200      | 0.040293853 | 35559 | 1479.66 |
| PCOLCE2  | rs12638256 | 3  | 142936448 | A | G | 0.4881 | 0.33  | 1E-200      | 0.00888525  | 35559 | 1379.32 |
| DNAJB6   | rs12668458 | 7  | 157352780 | C | T | 0.4385 | 0.05  | 2.75423E-10 | 0.007921399 | 35559 | 39.84   |
| XXYLT1   | rs12695049 | 3  | 195268211 | C | T | 0.467  | -0.2  | 6.9183E-127 | 0.008346528 | 35559 | 574.15  |
| UROD     | rs12749939 | 1  | 45012761  | T | C | 0.2879 | -0.27 | 1E-200      | 0.008595797 | 35559 | 986.58  |
| ESAM     | rs12792040 | 11 | 124754254 | A | G | 0.0963 | -0.28 | 5.62341E-92 | 0.01376557  | 35559 | 413.72  |
| SLITRK5  | rs12877225 | 13 | 87995130  | A | G | 0.2563 | -0.14 | 1.90546E-47 | 0.009675938 | 35559 | 209.34  |
| DLK1     | rs12881545 | 14 | 100709875 | G | C | 0.3898 | -0.45 | 1E-200      | 0.011698215 | 35559 | 1479.66 |
| KLC1     | rs12884809 | 14 | 103628983 | A | G | 0.3519 | 0.09  | 1.34896E-24 | 0.008791348 | 35559 | 104.8   |
| SERPINA3 | rs12891214 | 14 | 94672092  | T | C | 0.4094 | -0.12 | 3.54813E-42 | 0.008817795 | 35559 | 185.19  |
| RNASE1   | rs12897030 | 14 | 20814883  | C | T | 0.2965 | -0.22 | 7.2444E-131 | 0.009038299 | 35559 | 592.44  |
| AP1G2    | rs12897422 | 14 | 23563818  | A | G | 0.1337 | -0.14 | 9.12011E-31 | 0.012140327 | 35559 | 132.98  |

|         |            |    |           |   |   |        |       |             |             |       |         |
|---------|------------|----|-----------|---|---|--------|-------|-------------|-------------|-------|---------|
| IVD     | rs12902310 | 15 | 40423228  | C | T | 0.3621 | 0.11  | 3.23594E-41 | 0.008180679 | 35559 | 180.79  |
| NPW     | rs12921264 | 16 | 2020432   | A | G | 0.1837 | -0.54 | 1E-200      | 0.014037859 | 35559 | 1479.66 |
| SPHK1   | rs12939873 | 17 | 76464066  | T | C | 0.324  | -0.06 | 5.7544E-11  | 0.00916033  | 35559 | 42.9    |
| LILRA2  | rs12972210 | 19 | 54626202  | A | G | 0.0468 | 0.4   | 2.51189E-36 | 0.031780599 | 35559 | 158.41  |
| COMP    | rs12974746 | 19 | 18795739  | G | A | 0.0379 | -0.54 | 1.6218E-134 | 0.021877259 | 35559 | 609.22  |
| FCER2   | rs12980031 | 19 | 7699550   | G | T | 0.2435 | 0.29  | 5.0119E-188 | 0.009915802 | 35559 | 855.29  |
| REG1A   | rs12990312 | 2  | 79094354  | T | C | 0.1099 | -0.13 | 9.77237E-20 | 0.014299144 | 35559 | 82.65   |
| GKN2    | rs12990985 | 2  | 68944477  | C | T | 0.019  | -0.56 | 4.7863E-79  | 0.029748984 | 35559 | 354.33  |
| IL1RL1  | rs13020553 | 2  | 102315366 | G | C | 0.4186 | -0.43 | 1E-200      | 0.011178295 | 35559 | 1479.66 |
| REG3A   | rs13026790 | 2  | 79171490  | C | T | 0.1599 | 0.12  | 1.31826E-24 | 0.011719246 | 35559 | 104.84  |
| PKDCC   | rs13026869 | 2  | 42071416  | A | G | 0.2273 | 0.06  | 8.70964E-10 | 0.009785656 | 35559 | 37.59   |
| PCNP    | rs13060373 | 3  | 101631980 | A | G | 0.4863 | -0.08 | 1.20226E-23 | 0.007981281 | 35559 | 100.46  |
| CNTN4   | rs13071423 | 3  | 2098694   | A | C | 0.1878 | 0.26  | 2.2909E-122 | 0.011052312 | 35559 | 553.37  |
| CHL1    | rs13077895 | 3  | 51395     | G | A | 0.3554 | -0.23 | 6.166E-156  | 0.008645444 | 35559 | 707.71  |
| BTD     | rs13078881 | 3  | 15645186  | C | G | 0.0288 | -1.36 | 1E-200      | 0.035354607 | 35559 | 1479.66 |
| CFI     | rs13117504 | 4  | 109737700 | G | C | 0.3832 | 0.2   | 3.0903E-124 | 0.008436506 | 35559 | 561.97  |
| CPZ     | rs13127468 | 4  | 8597931   | A | C | 0.4243 | -0.07 | 5.37032E-17 | 0.008354929 | 35559 | 70.19   |
| LAP3    | rs13147018 | 4  | 17601722  | G | A | 0.1563 | -0.07 | 2.0893E-10  | 0.011015591 | 35559 | 40.38   |
| TGFBI   | rs13159365 | 5  | 136053744 | T | C | 0.4358 | -0.46 | 1E-200      | 0.011958176 | 35559 | 1479.66 |
| HEXB    | rs13164140 | 5  | 74734513  | A | G | 0.2706 | 0.27  | 7.9433E-197 | 0.009020961 | 35559 | 895.77  |
| FAM172A | rs13165400 | 5  | 93755721  | A | G | 0.0957 | 0.1   | 1.34896E-12 | 0.014105978 | 35559 | 50.25   |
| THBS4   | rs13167730 | 5  | 80074424  | T | G | 0.0812 | 0.38  | 5.6234E-133 | 0.015485351 | 35559 | 602.14  |
| UBLCP1  | rs13171129 | 5  | 159306365 | A | C | 0.0304 | -0.51 | 1.4454E-101 | 0.023835862 | 35559 | 457.78  |
| HAVCR1  | rs13173581 | 5  | 157042797 | T | C | 0.272  | -0.37 | 1E-200      | 0.009618533 | 35559 | 1479.66 |
| CHKB    | rs131752   | 22 | 50584995  | T | C | 0.4071 | -0.08 | 1.07152E-24 | 0.007797577 | 35559 | 105.25  |
| FER     | rs13178668 | 5  | 108771079 | G | A | 0.3821 | 0.08  | 1.38038E-19 | 0.008836039 | 35559 | 81.97   |
| SPINK6  | rs13179181 | 5  | 148196423 | C | T | 0.4885 | 0.27  | 1E-200      | 0.007718605 | 35559 | 1223.56 |
| FSTL4   | rs13183672 | 5  | 133197825 | C | A | 0.1972 | -0.07 | 1.20226E-11 | 0.010324576 | 35559 | 45.96   |
| LRRC32  | rs1320646  | 11 | 76659003  | T | C | 0.2685 | 0.07  | 4.2658E-13  | 0.009659371 | 35559 | 52.51   |
| TREML2  | rs13207171 | 6  | 41198081  | T | C | 0.1494 | 0.76  | 1E-200      | 0.019756986 | 35559 | 1479.66 |
| EGFR    | rs13244925 | 7  | 55124563  | A | C | 0.4168 | 0.1   | 1.58489E-34 | 0.008160119 | 35559 | 150.17  |
| APOL3   | rs132631   | 22 | 36146146  | A | C | 0.1707 | -1    | 1E-200      | 0.025996034 | 35559 | 1479.66 |
| PTGES2  | rs13283456 | 9  | 128122474 | T | C | 0.1824 | -0.1  | 6.16595E-21 | 0.010652887 | 35559 | 88.11   |
| PDLIM1  | rs1328599  | 10 | 95294018  | G | T | 0.0575 | 0.13  | 4.16869E-14 | 0.017205736 | 35559 | 57.08   |
| COL15A1 | rs13296166 | 9  | 99049790  | A | G | 0.1018 | 0.22  | 2.29087E-58 | 0.013658951 | 35559 | 259.41  |

|          |             |    |           |   |   |        |       |             |             |       |         |
|----------|-------------|----|-----------|---|---|--------|-------|-------------|-------------|-------|---------|
| FAM19A5  | rs133688    | 22 | 48371876  | G | A | 0.2661 | -0.05 | 1.31826E-09 | 0.008243811 | 35559 | 36.78   |
| EGLN1    | rs1339891   | 1  | 231420649 | T | C | 0.1336 | 0.11  | 1.1749E-17  | 0.012857419 | 35559 | 73.19   |
| SERPINE2 | rs13412535  | 2  | 224010157 | A | G | 0.1938 | -0.8  | 1E-200      | 0.020796828 | 35559 | 1479.66 |
| ARHGAP25 | rs13413887  | 2  | 68769536  | A | G | 0.2319 | -0.17 | 1.04713E-75 | 0.009232967 | 35559 | 338.99  |
| EFEMP1   | rs1346790   | 2  | 55864736  | T | C | 0.2617 | 0.11  | 1.34896E-33 | 0.009106041 | 35559 | 145.92  |
| ARF4     | rs1354034   | 3  | 56815721  | T | C | 0.3812 | -0.09 | 1E-25       | 0.008582733 | 35559 | 109.95  |
| APOL1    | rs136148    | 22 | 36256885  | C | T | 0.2486 | -0.35 | 1E-200      | 0.009146314 | 35559 | 1464.26 |
| FBLN1    | rs136743    | 22 | 45532866  | C | A | 0.4453 | 0.06  | 1.44544E-14 | 0.007800035 | 35559 | 59.17   |
| LILRB1   | rs138131257 | 19 | 54572135  | G | A | 0.0659 | -1.61 | 1E-200      | 0.041853615 | 35559 | 1479.66 |
| MANF     | rs1383251   | 3  | 51329409  | G | A | 0.1328 | -0.09 | 3.0903E-13  | 0.012344997 | 35559 | 53.15   |
| FLII     | rs138865936 | 17 | 18261705  | T | C | 0.0243 | 0.25  | 1.02329E-21 | 0.026110963 | 35559 | 91.67   |
| PAICS    | rs138933625 | 4  | 56448446  | G | C | 0.0334 | -0.19 | 6.0256E-19  | 0.021368575 | 35559 | 79.06   |
| C1QC     | rs139104615 | 1  | 22615055  | T | C | 0.0089 | 0.44  | 1.51356E-23 | 0.043997014 | 35559 | 100.01  |
| POSTN    | rs139240369 | 13 | 37472287  | T | C | 0.0268 | -0.2  | 5.01187E-15 | 0.025553837 | 35559 | 61.25   |
| MFAP4    | rs139356332 | 17 | 19385973  | C | G | 0.0246 | -0.65 | 1.7378E-130 | 0.026743524 | 35559 | 590.7   |
| IGLL1    | rs139571703 | 22 | 23573433  | T | C | 0.0329 | -0.96 | 1E-200      | 0.024956193 | 35559 | 1479.66 |
| PF4      | rs1398015   | 4  | 73891519  | T | C | 0.0591 | -0.15 | 5.62341E-18 | 0.017361197 | 35559 | 74.64   |
| IL22     | rs139977220 | 12 | 68267650  | A | G | 0.0523 | 0.13  | 1.54882E-12 | 0.018387432 | 35559 | 49.98   |
| SIGLEC7  | rs140185670 | 19 | 51142883  | C | G | 0.0856 | -0.55 | 1E-200      | 0.015226974 | 35559 | 1304.59 |
| PTGR1    | rs140330169 | 9  | 111567336 | T | C | 0.0436 | 0.21  | 1.51356E-28 | 0.018947588 | 35559 | 122.83  |
| ACP6     | rs140566115 | 1  | 147654322 | A | G | 0.0262 | -0.82 | 1E-200      | 0.021782916 | 35559 | 1417    |
| PGLYRP2  | rs140755383 | 19 | 15474182  | A | C | 0.1641 | -0.35 | 1E-200      | 0.010872298 | 35559 | 1036.26 |
| KPNA6    | rs140904849 | 1  | 31977167  | T | C | 0.0279 | 0.18  | 8.70964E-14 | 0.024131504 | 35559 | 55.64   |
| TFF3     | rs140914768 | 21 | 42315734  | T | C | 0.0062 | -0.35 | 6.91831E-13 | 0.048739458 | 35559 | 51.56   |
| AP1G2    | rs140983547 | 14 | 23565870  | T | C | 0.0102 | -0.62 | 7.76247E-49 | 0.042213025 | 35559 | 215.71  |
| F13B     | rs1412635   | 1  | 197053918 | A | G | 0.4709 | -0.34 | 1E-200      | 0.008838652 | 35559 | 1479.66 |
| SCGB3A1  | rs141351189 | 5  | 180601275 | A | G | 0.0253 | 0.31  | 1.04713E-32 | 0.026028088 | 35559 | 141.85  |
| SF3B4    | rs141494464 | 1  | 149875751 | T | C | 0.0864 | -0.09 | 1.09648E-09 | 0.014766946 | 35559 | 37.14   |
| POLM     | rs141574506 | 7  | 44053918  | C | T | 0.0958 | -0.14 | 1.02329E-24 | 0.013639848 | 35559 | 105.34  |
| DPT      | rs141588269 | 1  | 168843543 | T | C | 0.0261 | 0.24  | 4.89779E-20 | 0.02618302  | 35559 | 84.02   |
| LILRA2   | rs141795960 | 19 | 54572099  | C | T | 0.0659 | 0.8   | 1E-200      | 0.022662521 | 35559 | 1246.06 |
| POLM     | rs142059440 | 7  | 44074256  | C | G | 0.021  | 0.46  | 2.18776E-61 | 0.027826186 | 35559 | 273.26  |
| LUM      | rs142086573 | 12 | 90914869  | T | C | 0.0187 | 0.28  | 2.04174E-20 | 0.03023714  | 35559 | 85.75   |
| NPTX1    | rs142109116 | 17 | 80470474  | T | C | 0.0166 | 0.27  | 5.01187E-18 | 0.031202688 | 35559 | 74.87   |
| VNN2     | rs143098434 | 6  | 133138760 | T | C | 0.0096 | -0.33 | 6.60693E-16 | 0.040853864 | 35559 | 65.24   |

|         |             |    |           |   |   |        |       |             |             |       |         |
|---------|-------------|----|-----------|---|---|--------|-------|-------------|-------------|-------|---------|
| ADIPOQ  | rs143257534 | 3  | 186834099 | T | C | 0.0344 | -0.64 | 1.8621E-154 | 0.024173398 | 35559 | 700.91  |
| ENPP2   | rs1433948   | 8  | 119694004 | C | A | 0.4227 | -0.11 | 9.54993E-37 | 0.008687117 | 35559 | 160.33  |
| CPNE1   | rs143646210 | 20 | 35612055  | A | G | 0.0957 | -1.08 | 1E-200      | 0.028075717 | 35559 | 1479.66 |
| IGSF3   | rs143770903 | 1  | 116577113 | A | C | 0.0193 | 0.27  | 1.58489E-19 | 0.029871423 | 35559 | 81.69   |
| DTYMK   | rs144303868 | 2  | 241680143 | C | G | 0.0601 | 0.16  | 6.91831E-20 | 0.017526708 | 35559 | 83.33   |
| RCL     | rs144767533 | 6  | 43218400  | C | T | 0.0924 | -0.16 | 3.16228E-30 | 0.014005246 | 35559 | 130.51  |
| PTGR1   | rs144875739 | 9  | 111431329 | A | G | 0.0171 | -1.02 | 1E-200      | 0.028219713 | 35559 | 1306.38 |
| ADAM23  | rs1448903   | 2  | 206444237 | G | A | 0.0981 | 0.63  | 1E-200      | 0.016377502 | 35559 | 1479.66 |
| COMP    | rs145122962 | 19 | 18795828  | T | C | 0.0157 | -0.22 | 2.29087E-11 | 0.03290374  | 35559 | 44.7    |
| IGFBP3  | rs145188037 | 7  | 45914866  | A | G | 0.0176 | 1.03  | 1E-200      | 0.031150347 | 35559 | 1093.26 |
| OVCA2   | rs145234879 | 17 | 2042060   | A | C | 0.0089 | 0.41  | 8.70964E-21 | 0.043847137 | 35559 | 87.43   |
| NME2    | rs145372333 | 17 | 51149056  | A | G | 0.039  | -0.35 | 2.51189E-63 | 0.020835456 | 35559 | 282.17  |
| NPPA    | rs145488887 | 1  | 11767739  | C | T | 0.0461 | 0.13  | 4.16869E-12 | 0.018755389 | 35559 | 48.04   |
| APCS    | rs146174215 | 1  | 159574733 | C | A | 0.031  | -0.54 | 2.6915E-115 | 0.023660024 | 35559 | 520.87  |
| PLAU    | rs146287686 | 10 | 73937934  | A | G | 0.0177 | -0.23 | 1.69824E-14 | 0.029980591 | 35559 | 58.85   |
| PMM2    | rs146544605 | 16 | 8900886   | G | C | 0.0349 | -0.14 | 3.80189E-10 | 0.022357248 | 35559 | 39.21   |
| CPN2    | rs1466733   | 3  | 194400269 | G | A | 0.2322 | 0.11  | 9.77237E-30 | 0.009712293 | 35559 | 128.27  |
| VIT     | rs1468810   | 2  | 36766797  | C | A | 0.4048 | 0.36  | 1E-200      | 0.009358572 | 35559 | 1479.66 |
| DSG2    | rs147145691 | 18 | 31526091  | T | C | 0.0225 | -0.32 | 5.49541E-31 | 0.02764498  | 35559 | 133.98  |
| RNASE3  | rs147307766 | 14 | 20917832  | T | C | 0.0351 | 0.76  | 1E-200      | 0.022255365 | 35559 | 1166.09 |
| GRAP2   | rs148328786 | 22 | 39946989  | G | A | 0.0481 | 0.15  | 1.14815E-15 | 0.01872686  | 35559 | 64.15   |
| COL6A2  | rs148337125 | 21 | 46132608  | G | T | 0.0473 | 0.32  | 2.88403E-63 | 0.019058861 | 35559 | 281.89  |
| SULT1A3 | rs148788997 | 16 | 30311847  | C | G | 0.1409 | 0.2   | 5.01187E-60 | 0.01223888  | 35559 | 267.03  |
| VWA2    | rs148990087 | 10 | 114251043 | A | G | 0.0375 | -0.19 | 1.77828E-18 | 0.021663458 | 35559 | 76.92   |
| LRIG3   | rs1497237   | 12 | 58763470  | C | T | 0.3822 | -0.06 | 2.29087E-11 | 0.008973747 | 35559 | 44.7    |
| PIP     | rs149884636 | 7  | 143041505 | A | G | 0.01   | -1.14 | 8.7096E-177 | 0.040213628 | 35559 | 803.6   |
| CAPN2   | rs150394890 | 1  | 223676678 | T | G | 0.0126 | -0.78 | 2.75423E-96 | 0.037460974 | 35559 | 433.52  |
| DTD2    | rs150554078 | 14 | 30929922  | G | A | 0.0033 | -0.48 | 1.28825E-11 | 0.070901535 | 35559 | 45.83   |
| ADAMTS5 | rs151058    | 21 | 26939253  | T | C | 0.1208 | -0.56 | 1E-200      | 0.014557779 | 35559 | 1479.66 |
| PDGFD   | rs1532673   | 11 | 104139237 | G | T | 0.3666 | 0.07  | 1.20226E-16 | 0.008451162 | 35559 | 68.24   |
| UCMA    | rs1537771   | 10 | 13241177  | T | C | 0.1287 | -0.4  | 1E-200      | 0.012306945 | 35559 | 1056.32 |
| LSAMP   | rs1541871   | 3  | 116383969 | T | C | 0.1514 | -0.2  | 7.4131E-70  | 0.011319977 | 35559 | 312.14  |
| VWC2    | rs1544434   | 7  | 49502717  | G | A | 0.4149 | 0.16  | 4.67735E-76 | 0.008669327 | 35559 | 340.6   |
| ST3GAL6 | rs1585987   | 3  | 99016584  | A | G | 0.4669 | -0.08 | 7.4131E-27  | 0.007456197 | 35559 | 115.11  |
| GFRA2   | rs15881     | 8  | 21693256  | A | C | 0.4951 | -0.31 | 1E-200      | 0.008468253 | 35559 | 1340.02 |

|          |            |    |           |   |   |        |       |             |             |       |         |
|----------|------------|----|-----------|---|---|--------|-------|-------------|-------------|-------|---------|
| RIPK2    | rs160438   | 8  | 89643912  | G | A | 0.1329 | 0.08  | 8.91251E-13 | 0.011194549 | 35559 | 51.07   |
| NTRK2    | rs1624327  | 9  | 84814375  | A | G | 0.2952 | -0.08 | 7.24436E-17 | 0.009588904 | 35559 | 69.6    |
| KLK7     | rs1624358  | 19 | 50983919  | T | G | 0.0854 | -0.53 | 1E-200      | 0.015211805 | 35559 | 1213.85 |
| SPINK4   | rs1630171  | 9  | 33234041  | G | A | 0.1527 | 0.28  | 6.6069E-139 | 0.011160403 | 35559 | 629.41  |
| CNTN4    | rs163352   | 3  | 3056357   | G | C | 0.1989 | 0.29  | 6.9183E-156 | 0.010902548 | 35559 | 707.48  |
| CD68     | rs1641511  | 17 | 7656359   | G | A | 0.2222 | 0.06  | 3.01995E-10 | 0.009527211 | 35559 | 39.66   |
| LILRA3   | rs1645788  | 19 | 54297564  | G | A | 0.2165 | -1.23 | 1E-200      | 0.031975122 | 35559 | 1479.66 |
| CHST11   | rs1650132  | 12 | 104587879 | G | A | 0.481  | -0.28 | 1E-200      | 0.008268139 | 35559 | 1146.77 |
| NRP2     | rs16837000 | 2  | 205130682 | T | G | 0.1971 | -0.16 | 8.31764E-52 | 0.010565334 | 35559 | 229.32  |
| CXCL6    | rs16850073 | 4  | 73838282  | T | C | 0.3885 | 0.65  | 1E-200      | 0.016897422 | 35559 | 1479.66 |
| FMOD     | rs16851364 | 1  | 203349016 | A | G | 0.0771 | -0.25 | 1.04713E-58 | 0.015475082 | 35559 | 260.97  |
| NFASC    | rs16854533 | 1  | 204852036 | A | G | 0.1015 | 0.24  | 6.76083E-73 | 0.013290124 | 35559 | 326.09  |
| SERPINE2 | rs16865705 | 2  | 224268510 | C | G | 0.1441 | 0.13  | 1.04713E-31 | 0.011095307 | 35559 | 137.27  |
| WISP1    | rs16904832 | 8  | 133100893 | A | G | 0.2169 | 0.47  | 1E-200      | 0.012218136 | 35559 | 1479.66 |
| PDCD1LG2 | rs16923189 | 9  | 5510644   | G | A | 0.2871 | 0.35  | 1E-200      | 0.009098612 | 35559 | 1479.66 |
| NAAA     | rs17001208 | 4  | 75915873  | C | T | 0.0531 | 0.67  | 1E-200      | 0.017417343 | 35559 | 1479.66 |
| LOXL3    | rs17010021 | 2  | 74534412  | A | T | 0.059  | -0.22 | 6.91831E-37 | 0.017339621 | 35559 | 160.97  |
| ANXA4    | rs17037076 | 2  | 69806517  | A | G | 0.2209 | -0.29 | 2.6915E-200 | 0.009603994 | 35559 | 911.73  |
| INHBB    | rs17050272 | 2  | 120548864 | A | G | 0.4176 | 0.34  | 1E-200      | 0.008838652 | 35559 | 1479.66 |
| SERPINA9 | rs17090930 | 14 | 94468900  | T | G | 0.299  | -0.18 | 6.0256E-85  | 0.009216279 | 35559 | 381.43  |
| IGFBP7   | rs1718860  | 4  | 57083351  | G | A | 0.2947 | 0.3   | 1E-200      | 0.009137554 | 35559 | 1077.85 |
| GPNMB    | rs1728326  | 7  | 23195362  | G | T | 0.0442 | -0.2  | 3.80189E-23 | 0.02018354  | 35559 | 98.18   |
| NTN4     | rs17288108 | 12 | 95738117  | G | A | 0.1424 | -0.24 | 1.28825E-95 | 0.011567595 | 35559 | 430.44  |
| APOA4    | rs1729408  | 11 | 116804102 | G | A | 0.3437 | -0.07 | 2.39883E-17 | 0.008261883 | 35559 | 71.78   |
| NQO2     | rs17300141 | 6  | 3012544   | A | G | 0.0258 | 0.95  | 1E-200      | 0.024696233 | 35559 | 1479.66 |
| PI3      | rs17332620 | 20 | 45148865  | T | C | 0.2012 | 0.34  | 1E-200      | 0.010227694 | 35559 | 1105.04 |
| ADIPOQ   | rs17366653 | 3  | 186853027 | C | T | 0.0033 | -0.69 | 2.0893E-22  | 0.070861161 | 35559 | 94.81   |
| PPIC     | rs17388251 | 5  | 123024708 | C | T | 0.3898 | -0.42 | 1E-200      | 0.010918334 | 35559 | 1479.66 |
| GNLY     | rs17430897 | 2  | 85685839  | T | C | 0.0543 | 0.57  | 1E-200      | 0.017384742 | 35559 | 1074.95 |
| ERAP1    | rs17482078 | 5  | 96783162  | T | C | 0.2204 | -0.83 | 1E-200      | 0.021576709 | 35559 | 1479.66 |
| GKN2     | rs17504565 | 2  | 68932692  | A | G | 0.0505 | -0.84 | 1E-200      | 0.021836669 | 35559 | 1479.66 |
| ADAMTSL1 | rs1755286  | 9  | 17960184  | C | T | 0.3872 | -0.05 | 8.12831E-10 | 0.008140139 | 35559 | 37.73   |
| MSR1     | rs17583220 | 8  | 16556987  | C | T | 0.3937 | -0.12 | 9.77237E-45 | 0.008551185 | 35559 | 196.92  |
| CAPN2    | rs17599    | 1  | 223766378 | C | A | 0.2836 | -0.11 | 1.07152E-31 | 0.0093899   | 35559 | 137.23  |
| SPINT1   | rs17658212 | 15 | 40853721  | T | C | 0.0475 | -0.4  | 5.62341E-94 | 0.019450306 | 35559 | 422.9   |

|          |             |    |           |   |   |        |       |             |             |       |         |
|----------|-------------|----|-----------|---|---|--------|-------|-------------|-------------|-------|---------|
| FLRT2    | rs1767407   | 14 | 85213582  | A | G | 0.2845 | -0.09 | 1.44544E-22 | 0.009207417 | 35559 | 95.54   |
| ANKRD27  | rs17693106  | 19 | 32634149  | A | G | 0.4023 | -0.05 | 1.28825E-10 | 0.007777801 | 35559 | 41.32   |
| RARRES1  | rs17699478  | 3  | 158708454 | T | C | 0.2078 | -0.28 | 1E-200      | 0.007874661 | 35559 | 1264.24 |
| PYGL     | rs17720606  | 14 | 50864597  | A | C | 0.2866 | -0.07 | 3.54813E-16 | 0.008585728 | 35559 | 66.47   |
| GCA      | rs17783344  | 2  | 162352383 | G | T | 0.0954 | -0.43 | 1E-200      | 0.013494686 | 35559 | 1015.28 |
| CYB5A    | rs17806420  | 18 | 74316132  | T | C | 0.1905 | -0.1  | 7.58578E-24 | 0.009931618 | 35559 | 101.38  |
| CNDP1    | rs17817077  | 18 | 74542308  | A | G | 0.3895 | 0.28  | 1E-200      | 0.008448524 | 35559 | 1098.32 |
| PPID     | rs17843929  | 4  | 158715961 | T | C | 0.2608 | 0.27  | 7.0795E-185 | 0.009311155 | 35559 | 840.81  |
| FUT10    | rs17855838  | 8  | 33389073  | C | G | 0.2227 | 0.46  | 1E-200      | 0.011958176 | 35559 | 1479.66 |
| IL16     | rs17875523  | 15 | 81304211  | T | C | 0.0869 | -1.06 | 1E-200      | 0.027555796 | 35559 | 1479.66 |
| INSR     | rs1799815   | 19 | 7125508   | A | G | 0.0521 | -0.17 | 1.69824E-18 | 0.019371645 | 35559 | 77.01   |
| PRSS2    | rs1799886   | 7  | 142800839 | C | T | 0.4101 | 0.2   | 1.2023E-124 | 0.008422395 | 35559 | 563.85  |
| ALAD     | rs1800435   | 9  | 113391611 | G | C | 0.0868 | -0.42 | 1.122E-179  | 0.014694519 | 35559 | 816.89  |
| MBL2     | rs1800451   | 10 | 52771466  | T | C | 0.0129 | -1.48 | 1E-200      | 0.038474131 | 35559 | 1479.66 |
| LRPAP1   | rs1800493   | 4  | 3514832   | T | C | 0.0101 | -0.81 | 1.65959E-93 | 0.039487805 | 35559 | 420.75  |
| CRP      | rs1800947   | 1  | 159713648 | G | C | 0.0624 | -0.18 | 1.28825E-26 | 0.016856866 | 35559 | 114.02  |
| FCGR2A   | rs1801274   | 1  | 161509955 | A | G | 0.4405 | -1.24 | 1E-200      | 0.032235083 | 35559 | 1479.66 |
| FCGR2B   | rs1801274   | 1  | 161509955 | A | G | 0.4405 | -0.49 | 1E-200      | 0.012738057 | 35559 | 1479.66 |
| ITGA2    | rs181769    | 5  | 52981625  | C | A | 0.3151 | 0.09  | 1.47911E-28 | 0.008118885 | 35559 | 122.88  |
| MXRA8    | rs181929025 | 1  | 1355705   | T | C | 0.0152 | -0.34 | 2.39883E-22 | 0.034967559 | 35559 | 94.54   |
| SIGLEC7  | rs1827321   | 19 | 51122452  | A | G | 0.4536 | 0.09  | 3.31131E-27 | 0.008330592 | 35559 | 116.71  |
| CNTN1    | rs1838343   | 12 | 40802428  | T | C | 0.4596 | -0.2  | 1.1482E-127 | 0.008320587 | 35559 | 577.73  |
| TIMP4    | rs184262    | 3  | 12093240  | A | G | 0.1607 | -0.42 | 1E-200      | 0.011162179 | 35559 | 1415.72 |
| ESM1     | rs1848502   | 5  | 55026648  | G | C | 0.2716 | -0.11 | 2.23872E-31 | 0.009440358 | 35559 | 135.76  |
| EPHB1    | rs185257    | 3  | 134953443 | A | C | 0.4766 | 0.28  | 1E-200      | 0.008015186 | 35559 | 1220.29 |
| PILRA    | rs1859788   | 7  | 100374211 | A | G | 0.3039 | 1.3   | 1E-200      | 0.033794845 | 35559 | 1479.66 |
| PGLYRP3  | rs1865234   | 1  | 153343308 | T | C | 0.101  | 0.08  | 1.58489E-10 | 0.012505919 | 35559 | 40.92   |
| PLEK     | rs1867312   | 2  | 68392849  | C | A | 0.4493 | -0.1  | 3.63078E-36 | 0.007963576 | 35559 | 157.67  |
| PSAP     | rs1867981   | 10 | 71835464  | C | T | 0.4849 | 0.27  | 1E-200      | 0.008084049 | 35559 | 1115.44 |
| STIM1    | rs1869085   | 11 | 3883134   | C | A | 0.3255 | -0.1  | 5.37032E-29 | 0.008948088 | 35559 | 124.89  |
| TMEM132D | rs1875445   | 12 | 129860675 | T | C | 0.0532 | 0.12  | 2.81838E-11 | 0.018029494 | 35559 | 44.3    |
| RTP4     | rs1878861   | 3  | 187375904 | G | A | 0.4167 | 0.33  | 1E-200      | 0.008578691 | 35559 | 1479.66 |
| PRCP     | rs188172480 | 11 | 82882681  | A | G | 0.0219 | -0.22 | 5.12861E-14 | 0.02922189  | 35559 | 56.68   |
| SEZ6L    | rs188357839 | 22 | 26367507  | G | C | 0.0219 | -0.19 | 9.12011E-12 | 0.027860272 | 35559 | 46.51   |
| RNASE4   | rs1888560   | 14 | 20696086  | T | C | 0.3199 | -0.31 | 1E-200      | 0.008698767 | 35559 | 1269.94 |

|         |             |    |           |   |   |        |       |             |             |       |         |
|---------|-------------|----|-----------|---|---|--------|-------|-------------|-------------|-------|---------|
| TLL1    | rs1903176   | 4  | 165742950 | A | T | 0.3621 | -0.06 | 1.20226E-11 | 0.008849637 | 35559 | 45.96   |
| CPM     | rs1908671   | 12 | 69039624  | C | G | 0.2931 | -0.1  | 4.7863E-29  | 0.008939915 | 35559 | 125.11  |
| ARF4    | rs191829509 | 3  | 57624220  | A | G | 0.0622 | 0.13  | 1.62181E-14 | 0.016932522 | 35559 | 58.94   |
| IGDCC4  | rs191927852 | 15 | 65493359  | T | G | 0.0099 | 0.71  | 1.54882E-68 | 0.040581724 | 35559 | 306.08  |
| ISG15   | rs1921      | 1  | 1014228   | A | G | 0.4572 | 0.31  | 1E-200      | 0.008206009 | 35559 | 1427.04 |
| CHST11  | rs1922263   | 12 | 104478114 | A | C | 0.1207 | -0.21 | 4.57088E-65 | 0.012328059 | 35559 | 290.15  |
| LRRTM4  | rs1922804   | 2  | 77467668  | A | T | 0.3135 | -0.05 | 6.60693E-10 | 0.008096871 | 35559 | 38.13   |
| DCLK1   | rs1926318   | 13 | 36070005  | T | C | 0.2111 | 0.22  | 6.7608E-108 | 0.009970253 | 35559 | 486.86  |
| GFRA2   | rs192923146 | 8  | 21897507  | T | G | 0.0184 | -0.26 | 2.5704E-16  | 0.031738497 | 35559 | 67.1    |
| BPI     | rs1934913   | 20 | 38296880  | C | T | 0.4054 | 0.29  | 1E-200      | 0.008553655 | 35559 | 1149.39 |
| UROS    | rs1935451   | 10 | 125816857 | G | A | 0.1103 | 0.3   | 2.3442E-114 | 0.013199311 | 35559 | 516.55  |
| HEBP1   | rs1941      | 12 | 12975329  | G | C | 0.0274 | -1.37 | 1E-200      | 0.035614567 | 35559 | 1479.66 |
| SMOC1   | rs1958078   | 14 | 69888141  | A | C | 0.1328 | -0.25 | 5.88844E-93 | 0.012224355 | 35559 | 418.22  |
| CFHR1   | rs1963605   | 1  | 196853038 | C | A | 0.2331 | -0.13 | 1.04713E-47 | 0.008959335 | 35559 | 210.53  |
| ANGPT2  | rs1968586   | 8  | 6421990   | T | C | 0.3488 | -0.13 | 2.51189E-49 | 0.008805392 | 35559 | 217.95  |
| SPON1   | rs1969539   | 11 | 14017074  | A | G | 0.452  | 0.28  | 1E-200      | 0.008228454 | 35559 | 1157.86 |
| CCL11   | rs1989357   | 17 | 34227435  | T | A | 0.3912 | -0.12 | 2.69153E-44 | 0.008595296 | 35559 | 194.9   |
| TGM4    | rs1995640   | 3  | 44901577  | T | C | 0.4112 | -0.05 | 2.34423E-10 | 0.007890284 | 35559 | 40.15   |
| MAPK8   | rs1997365   | 10 | 48299932  | C | A | 0.2919 | -0.06 | 2.29087E-10 | 0.009463042 | 35559 | 40.2    |
| SIGLEC6 | rs2005199   | 19 | 51529952  | A | G | 0.0812 | 0.71  | 1E-200      | 0.018457184 | 35559 | 1479.66 |
| NCAM1   | rs2012801   | 11 | 113125732 | A | G | 0.2185 | -0.23 | 1.0471E-112 | 0.010194581 | 35559 | 508.97  |
| WISP1   | rs2013158   | 8  | 133190699 | A | C | 0.2624 | 0.22  | 4.57088E-14 | 0.029163702 | 35559 | 56.9    |
| CCL18   | rs2015086   | 17 | 36064257  | G | A | 0.1135 | 0.89  | 1E-200      | 0.023136471 | 35559 | 1479.66 |
| APOF    | rs2020854   | 12 | 56349583  | C | T | 0.0901 | -0.31 | 3.2359E-102 | 0.014441431 | 35559 | 460.76  |
| B3GALTL | rs2025727   | 13 | 31311017  | G | A | 0.233  | -0.27 | 7.5858E-191 | 0.009162737 | 35559 | 868.27  |
| MTRF1L  | rs2038332   | 6  | 152999591 | G | A | 0.2119 | -0.19 | 6.30957E-90 | 0.009449083 | 35559 | 404.3   |
| SHANK3  | rs2040487   | 22 | 50708587  | G | A | 0.4703 | 0.06  | 1.12202E-14 | 0.007767389 | 35559 | 59.67   |
| EPB41   | rs204074    | 1  | 28865051  | C | T | 0.1135 | -0.1  | 5.62341E-15 | 0.012800623 | 35559 | 61.03   |
| TAPBPL  | rs2041388   | 12 | 6453670   | A | G | 0.2653 | 1.33  | 1E-200      | 0.034574726 | 35559 | 1479.66 |
| HGD     | rs2042482   | 3  | 120675205 | A | T | 0.2603 | -0.12 | 2.95121E-40 | 0.009034904 | 35559 | 176.4   |
| UAP1    | rs2048335   | 1  | 162606415 | A | G | 0.2442 | -0.06 | 2.69153E-11 | 0.009005588 | 35559 | 44.39   |
| MAPRE1  | rs20654     | 20 | 32830490  | G | A | 0.3116 | -0.07 | 3.98107E-14 | 0.009257286 | 35559 | 57.17   |
| TPI1    | rs2071065   | 12 | 6867905   | C | T | 0.2881 | -0.06 | 2.13796E-10 | 0.009447199 | 35559 | 40.33   |
| RBP1    | rs2071387   | 3  | 139538761 | G | A | 0.2057 | 0.09  | 1.14815E-20 | 0.009655202 | 35559 | 86.88   |
| AGT     | rs2071404   | 1  | 230715194 | A | C | 0.0929 | 0.28  | 6.91831E-92 | 0.013772453 | 35559 | 413.3   |

|         |           |    |           |   |   |        |       |             |             |       |         |
|---------|-----------|----|-----------|---|---|--------|-------|-------------|-------------|-------|---------|
| CXCL1   | rs2071425 | 4  | 73869527  | G | A | 0.1786 | 0.71  | 1E-200      | 0.020872474 | 35559 | 1157.03 |
| PGLYRP1 | rs2072563 | 19 | 46023390  | A | G | 0.3186 | -0.19 | 7.4131E-107 | 0.00865325  | 35559 | 482.09  |
| CA3     | rs2072696 | 8  | 85438822  | C | G | 0.2478 | -0.2  | 5.01187E-97 | 0.009567933 | 35559 | 436.92  |
| FGL1    | rs2073562 | 8  | 17885420  | A | G | 0.3154 | -0.52 | 1E-200      | 0.013517938 | 35559 | 1479.66 |
| CCL15   | rs2075746 | 17 | 35998496  | T | C | 0.4457 | -0.05 | 2.5704E-11  | 0.007497047 | 35559 | 44.48   |
| SIGLEC9 | rs2075803 | 19 | 51125272  | A | G | 0.4787 | 1.23  | 1E-200      | 0.031975122 | 35559 | 1479.66 |
| FUT8    | rs2127870 | 14 | 65330128  | G | C | 0.171  | 1.05  | 1E-200      | 0.027295836 | 35559 | 1479.66 |
| TGM3    | rs214830  | 20 | 2340459   | G | C | 0.3073 | -0.36 | 1E-200      | 0.009358572 | 35559 | 1479.66 |
| GAS1    | rs2150719 | 9  | 86584460  | T | C | 0.483  | 0.07  | 6.76083E-16 | 0.008668986 | 35559 | 65.2    |
| PPCS    | rs2152315 | 1  | 42441912  | G | A | 0.358  | -0.1  | 5.24807E-34 | 0.008225528 | 35559 | 147.79  |
| ANXA11  | rs2152546 | 10 | 80146628  | T | G | 0.4544 | -0.15 | 1.69824E-76 | 0.008103496 | 35559 | 342.62  |
| AMIGO2  | rs215379  | 12 | 47360853  | T | C | 0.4977 | 0.06  | 1.34896E-11 | 0.008871427 | 35559 | 45.74   |
| NQO1    | rs2161631 | 16 | 69523045  | A | C | 0.1704 | -0.86 | 1E-200      | 0.02235659  | 35559 | 1479.66 |
| SNX1    | rs2166735 | 15 | 64525322  | T | C | 0.1113 | 0.08  | 4.0738E-10  | 0.012797597 | 35559 | 39.07   |
| HP      | rs217184  | 16 | 72072066  | C | T | 0.1835 | 0.74  | 1E-200      | 0.019237065 | 35559 | 1479.66 |
| MTHFD2  | rs2177705 | 2  | 74254096  | T | C | 0.0464 | -0.11 | 8.51138E-10 | 0.017929663 | 35559 | 37.64   |
| CNTFR   | rs2183012 | 9  | 34554022  | A | G | 0.0219 | 0.22  | 3.46737E-15 | 0.027944246 | 35559 | 61.98   |
| KREMEN1 | rs2205771 | 22 | 29098605  | A | G | 0.1746 | 0.21  | 1.25893E-83 | 0.010838808 | 35559 | 375.36  |
| SORCS1  | rs2210969 | 10 | 107273264 | G | A | 0.4334 | 0.06  | 5.01187E-15 | 0.007666151 | 35559 | 61.25   |
| TRIL    | rs221167  | 7  | 28965479  | C | T | 0.1123 | 0.11  | 9.12011E-18 | 0.012813733 | 35559 | 73.69   |
| DPY30   | rs221205  | 2  | 31861868  | T | C | 0.1152 | 0.1   | 1.34896E-16 | 0.012093114 | 35559 | 68.38   |
| PLAU    | rs2227551 | 10 | 73909432  | G | T | 0.2798 | 0.13  | 8.31764E-23 | 0.013224103 | 35559 | 96.63   |
| ECH1    | rs2229259 | 19 | 38816463  | T | C | 0.0877 | 0.45  | 1E-200      | 0.013860716 | 35559 | 1053.97 |
| PRCP    | rs2229437 | 11 | 82853252  | G | T | 0.1621 | 0.22  | 6.76083E-83 | 0.011405994 | 35559 | 372.01  |
| HSPG2   | rs2229475 | 1  | 21855402  | T | C | 0.0606 | 0.51  | 2.2909E-191 | 0.017283603 | 35559 | 870.66  |
| AKR1A1  | rs2229540 | 1  | 45566639  | G | A | 0.0646 | -0.92 | 1E-200      | 0.023916352 | 35559 | 1479.66 |
| AKR1B1  | rs2229542 | 7  | 134450869 | C | T | 0.017  | -0.2  | 9.77237E-11 | 0.030909842 | 35559 | 41.86   |
| RCN1    | rs223046  | 11 | 32091022  | C | A | 0.2363 | -0.08 | 5.01187E-10 | 0.012864358 | 35559 | 38.67   |
| TBCB    | rs2231569 | 19 | 36114973  | T | G | 0.0342 | 0.16  | 1.90546E-12 | 0.022723293 | 35559 | 49.58   |
| GNPDA1  | rs2232195 | 5  | 142007955 | G | A | 0.2918 | -0.06 | 6.16595E-11 | 0.009174791 | 35559 | 42.76   |
| RNASE2  | rs2233859 | 14 | 20891649  | A | C | 0.4675 | 0.14  | 1.7378E-74  | 0.007667229 | 35559 | 333.39  |
| TNR     | rs2235256 | 1  | 175599911 | G | A | 0.4708 | -0.13 | 4.89779E-62 | 0.007821357 | 35559 | 276.25  |
| CCL22   | rs223883  | 16 | 57354818  | G | A | 0.2393 | -0.19 | 1.04713E-85 | 0.009684082 | 35559 | 384.92  |
| CSF2RB  | rs2239749 | 22 | 36935263  | G | A | 0.4427 | -0.57 | 1E-200      | 0.01481774  | 35559 | 1479.66 |
| PLXND1  | rs2255703 | 3  | 129574413 | C | T | 0.3994 | -0.12 | 1.28825E-34 | 0.009778746 | 35559 | 150.58  |



|          |           |    |           |   |   |        |       |             |             |       |         |
|----------|-----------|----|-----------|---|---|--------|-------|-------------|-------------|-------|---------|
| VTA1     | rs225656  | 6  | 142166332 | A | C | 0.4738 | -0.05 | 7.24436E-10 | 0.008116017 | 35559 | 37.95   |
| IFNAR1   | rs2257167 | 21 | 33343393  | C | G | 0.1194 | -0.76 | 1E-200      | 0.019756986 | 35559 | 1479.66 |
| PARK7    | rs226251  | 1  | 7964630   | T | C | 0.3948 | -0.09 | 5.7544E-22  | 0.009342079 | 35559 | 92.81   |
| C5       | rs2269067 | 9  | 120974762 | C | G | 0.1776 | 0.17  | 1.90546E-56 | 0.010738508 | 35559 | 250.6   |
| THG1L    | rs2270812 | 5  | 157737954 | T | C | 0.3361 | -0.37 | 1E-200      | 0.009618533 | 35559 | 1479.66 |
| CRELD1   | rs2270894 | 3  | 9933702   | G | C | 0.2409 | 0.46  | 1E-200      | 0.011958176 | 35559 | 1479.66 |
| LY9      | rs2271967 | 1  | 160817915 | C | T | 0.2104 | 0.36  | 1.86209E-80 | 0.018951969 | 35559 | 360.8   |
| SCARF1   | rs2272011 | 17 | 1638896   | G | A | 0.4527 | 0.4   | 1E-200      | 0.010398414 | 35559 | 1479.66 |
| NHEJ1    | rs2272019 | 2  | 219137812 | C | A | 0.3203 | 0.09  | 2.23872E-25 | 0.008645763 | 35559 | 108.36  |
| CD300A   | rs2272111 | 17 | 74473827  | A | G | 0.198  | -0.68 | 1E-200      | 0.017677303 | 35559 | 1479.66 |
| WFDC2    | rs2272953 | 20 | 45481252  | C | T | 0.0778 | -0.11 | 1.20226E-12 | 0.015481814 | 35559 | 50.48   |
| ATXN3    | rs2273185 | 14 | 91993754  | A | C | 0.3681 | -0.24 | 3.3113E-192 | 0.008115473 | 35559 | 874.52  |
| CA6      | rs2274329 | 1  | 8949392   | C | G | 0.1153 | -0.79 | 1E-200      | 0.020536867 | 35559 | 1479.66 |
| LAMC2    | rs2276543 | 1  | 183186170 | A | G | 0.2397 | 0.62  | 1E-200      | 0.016117541 | 35559 | 1479.66 |
| CDCP1    | rs2276862 | 3  | 45146293  | G | C | 0.1742 | -0.29 | 4.4668E-166 | 0.010558483 | 35559 | 754.34  |
| PSAT1    | rs2277148 | 9  | 78297199  | G | C | 0.2185 | -0.15 | 2.0893E-52  | 0.009846116 | 35559 | 232.07  |
| FCER2    | rs2277989 | 19 | 7696926   | G | A | 0.4499 | -0.27 | 1E-200      | 0.008554019 | 35559 | 996.24  |
| TNFAIP6  | rs2278089 | 2  | 151290158 | G | T | 0.429  | 0.52  | 1E-200      | 0.013517938 | 35559 | 1479.66 |
| TPST2    | rs2283824 | 22 | 26528490  | A | G | 0.3512 | 0.15  | 1.07152E-67 | 0.008628118 | 35559 | 302.22  |
| NCAM1    | rs2288158 | 11 | 113262954 | G | T | 0.1301 | 0.33  | 2.6915E-149 | 0.012680892 | 35559 | 677.18  |
| IL2RB    | rs228953  | 22 | 37135396  | A | G | 0.4752 | 0.1   | 4.57088E-32 | 0.008484137 | 35559 | 138.92  |
| PNKP     | rs2290774 | 19 | 49871778  | C | T | 0.4648 | -0.11 | 7.94328E-41 | 0.00822139  | 35559 | 179.01  |
| PDLIM4   | rs2292260 | 5  | 132271243 | A | G | 0.0737 | -0.26 | 5.24807E-66 | 0.015151094 | 35559 | 294.47  |
| SERPINB1 | rs2293772 | 6  | 2835597   | A | G | 0.404  | -0.08 | 6.30957E-22 | 0.008312237 | 35559 | 92.62   |
| ESD      | rs2298087 | 13 | 46777268  | C | T | 0.0896 | -0.36 | 1.0233E-147 | 0.013908509 | 35559 | 669.91  |
| TFF3     | rs2298691 | 21 | 42380681  | T | C | 0.1211 | -0.08 | 2.69153E-10 | 0.012667091 | 35559 | 39.88   |
| IL17RA   | rs2302519 | 22 | 17104551  | T | C | 0.4506 | -0.54 | 1E-200      | 0.014037859 | 35559 | 1479.66 |
| CA11     | rs2303147 | 19 | 48639768  | T | C | 0.1616 | 0.18  | 7.94328E-65 | 0.010587021 | 35559 | 289.05  |
| GAA      | rs2304849 | 17 | 80101663  | C | G | 0.2212 | -0.36 | 1E-200      | 0.009554393 | 35559 | 1419.63 |
| GLTPD2   | rs2304969 | 17 | 4789264   | T | G | 0.1471 | -0.12 | 1.86209E-22 | 0.012308896 | 35559 | 95.04   |
| KDR      | rs2305948 | 4  | 55113391  | T | C | 0.0709 | 0.3   | 3.46737E-80 | 0.015820515 | 35559 | 359.56  |
| LRP4     | rs2306029 | 11 | 46871557  | T | C | 0.4455 | 0.42  | 1E-200      | 0.010918334 | 35559 | 1479.66 |
| CTSO     | rs2334114 | 4  | 155935041 | A | C | 0.2289 | -0.18 | 3.16228E-75 | 0.009808016 | 35559 | 336.79  |
| BCAN     | rs2365715 | 1  | 156645322 | G | A | 0.3942 | -0.2  | 6.9183E-124 | 0.008448609 | 35559 | 560.36  |
| PCSK7    | rs236910  | 11 | 117211258 | G | A | 0.2768 | -0.82 | 1E-200      | 0.021316748 | 35559 | 1479.66 |

|            |           |    |             |   |        |       |             |             |       |         |
|------------|-----------|----|-------------|---|--------|-------|-------------|-------------|-------|---------|
| ENO3       | rs238238  | 17 | 4953081 A   | G | 0.3307 | 0.33  | 1E-200      | 0.008578691 | 35559 | 1479.66 |
| SNX8       | rs2398666 | 7  | 2313965 A   | G | 0.1827 | 0.13  | 2.51189E-33 | 0.010807517 | 35559 | 144.68  |
| NUDT5      | rs2399786 | 10 | 12173181 C  | T | 0.4501 | -0.07 | 7.07946E-19 | 0.007888535 | 35559 | 78.74   |
| FGFR3      | rs2403274 | 4  | 1752788 G   | C | 0.2526 | -0.17 | 4.2658E-77  | 0.00914726  | 35559 | 345.38  |
| THBS4      | rs2404710 | 5  | 79960739 A  | C | 0.4189 | 0.11  | 6.30957E-39 | 0.008428768 | 35559 | 170.31  |
| UNC5D      | rs2405810 | 8  | 35261107 C  | T | 0.4744 | -0.1  | 4.67735E-34 | 0.008219171 | 35559 | 148.02  |
| RAB1A      | rs2422441 | 2  | 65143632 A  | G | 0.2339 | -0.06 | 9.33254E-11 | 0.009262996 | 35559 | 41.95   |
| JAG1       | rs2423507 | 20 | 10633691 G  | C | 0.3393 | 0.07  | 1.51356E-16 | 0.008479267 | 35559 | 68.15   |
| CASS4      | rs2426628 | 20 | 56451641 A  | G | 0.0791 | -0.1  | 1.54882E-12 | 0.014144178 | 35559 | 49.98   |
| PDGFR1     | rs2427709 | 8  | 17595419 C  | T | 0.0642 | -0.63 | 1E-200      | 0.016377502 | 35559 | 1479.66 |
| FBLN5      | rs2430349 | 14 | 91882631 A  | G | 0.2672 | 0.08  | 7.07946E-20 | 0.008765748 | 35559 | 83.29   |
| ALKBH3     | rs2434484 | 11 | 43927458 G  | T | 0.3393 | -0.24 | 1.8621E-172 | 0.008572918 | 35559 | 783.68  |
| RET        | rs2435359 | 10 | 43084567 A  | G | 0.2625 | -0.34 | 1E-200      | 0.009207797 | 35559 | 1363.4  |
| CSGALNACT2 | rs2435382 | 10 | 43181651 T  | A | 0.3315 | -0.12 | 6.60693E-43 | 0.008739249 | 35559 | 188.53  |
| OAF        | rs2444239 | 11 | 120185708 A | T | 0.4615 | -0.32 | 1E-200      | 0.008318731 | 35559 | 1479.66 |
| HRSP12     | rs2447507 | 8  | 98114724 T  | C | 0.4199 | 0.14  | 2.63027E-43 | 0.010146601 | 35559 | 190.37  |
| HBZ        | rs2461286 | 16 | 153255 A    | G | 0.3224 | 0.74  | 1E-200      | 0.019237065 | 35559 | 1479.66 |
| CNTNAP2    | rs2462603 | 7  | 146116762 A | G | 0.4984 | 0.11  | 8.31764E-46 | 0.007742788 | 35559 | 201.82  |
| ANGPTL1    | rs2476562 | 1  | 178657057 T | C | 0.3776 | -0.05 | 1.04713E-09 | 0.00819396  | 35559 | 37.23   |
| NRP1       | rs2506150 | 10 | 33194380 A  | G | 0.3311 | -0.3  | 1E-200      | 0.008612415 | 35559 | 1213.3  |
| NTM        | rs2511504 | 11 | 131326501 C | T | 0.4064 | 0.36  | 1E-200      | 0.009358572 | 35559 | 1479.66 |
| NID2       | rs2516600 | 14 | 52021048 T  | C | 0.4222 | -0.49 | 1E-200      | 0.012738057 | 35559 | 1479.66 |
| IFI16      | rs2518563 | 1  | 159090179 C | T | 0.1851 | -0.09 | 1.58489E-19 | 0.009957141 | 35559 | 81.69   |
| SOD3       | rs2536512 | 4  | 24799693 G  | A | 0.3234 | -0.28 | 1E-200      | 0.008756541 | 35559 | 1022.41 |
| PGM2       | rs2553287 | 4  | 37845022 T  | C | 0.258  | -0.08 | 2.04174E-19 | 0.008878031 | 35559 | 81.19   |
| LIFR       | rs2561821 | 5  | 38488072 A  | C | 0.4008 | -0.27 | 8.12831E-44 | 0.019449454 | 35559 | 192.7   |
| SRA1       | rs2563253 | 5  | 140582582 A | G | 0.4162 | 0.12  | 5.24807E-46 | 0.008427565 | 35559 | 202.74  |
| ACAT2      | rs25683   | 6  | 159775311 A | G | 0.43   | 0.27  | 1E-200      | 0.008234173 | 35559 | 1075.14 |
| PENK       | rs2576575 | 8  | 56448734 T  | C | 0.4541 | -0.48 | 1E-200      | 0.012478097 | 35559 | 1479.66 |
| HSP90B1    | rs2583264 | 12 | 103945832 C | T | 0.307  | 0.72  | 1E-200      | 0.018717145 | 35559 | 1479.66 |
| DPEP1      | rs258341  | 16 | 89624734 T  | C | 0.3619 | -0.48 | 1E-200      | 0.012478097 | 35559 | 1479.66 |
| TYRO3      | rs2588323 | 15 | 41549880 C  | G | 0.3377 | 0.12  | 8.70964E-44 | 0.008647286 | 35559 | 192.57  |
| SFRP4      | rs2598105 | 7  | 37937514 T  | C | 0.1551 | 0.27  | 1.2882E-123 | 0.011418274 | 35559 | 559.12  |
| DCTD       | rs2603350 | 4  | 183030757 G | A | 0.3727 | 0.08  | 1.69824E-23 | 0.008008592 | 35559 | 99.78   |
| NNMT       | rs2604277 | 11 | 114308380 T | A | 0.0519 | -0.13 | 2.45471E-12 | 0.018555891 | 35559 | 49.08   |

|           |            |    |           |   |   |        |       |             |             |       |         |
|-----------|------------|----|-----------|---|---|--------|-------|-------------|-------------|-------|---------|
| GSTA1     | rs2608631  | 6  | 52761471  | G | A | 0.3333 | -0.37 | 1E-200      | 0.009618533 | 35559 | 1479.66 |
| IBSP      | rs2616262  | 4  | 87802058  | T | G | 0.4876 | -0.09 | 3.54813E-31 | 0.00775007  | 35559 | 134.85  |
| PCBD1     | rs2630336  | 10 | 70888665  | T | G | 0.372  | -0.14 | 1.90546E-63 | 0.008326062 | 35559 | 282.72  |
| UNC5C     | rs264299   | 4  | 95606381  | C | T | 0.3102 | -0.15 | 1.41254E-65 | 0.008770454 | 35559 | 292.49  |
| COL6A3    | rs2646260  | 2  | 237369152 | G | A | 0.3155 | -0.14 | 7.4131E-62  | 0.008435619 | 35559 | 275.42  |
| KLK3      | rs2659051  | 19 | 50842312  | C | G | 0.1779 | -0.07 | 1.7378E-10  | 0.010966824 | 35559 | 40.74   |
| KLK8      | rs2659091  | 19 | 50943274  | A | G | 0.3955 | -0.07 | 5.7544E-17  | 0.00836305  | 35559 | 70.06   |
| CXCL12    | rs266085   | 10 | 44378805  | T | C | 0.3223 | 0.06  | 2.63027E-11 | 0.009001019 | 35559 | 44.43   |
| SCARA5    | rs2685414  | 8  | 27952867  | T | C | 0.2976 | -0.24 | 1.3183E-166 | 0.008723972 | 35559 | 756.78  |
| KLK14     | rs2691271  | 19 | 51092303  | G | C | 0.2183 | -0.19 | 7.07946E-46 | 0.013363292 | 35559 | 202.14  |
| CPQ       | rs2704248  | 8  | 96645187  | C | G | 0.0393 | -0.19 | 1.47911E-21 | 0.019923711 | 35559 | 90.94   |
| PCYOX1    | rs2706762  | 2  | 70261338  | T | C | 0.1403 | -0.82 | 1E-200      | 0.021316748 | 35559 | 1479.66 |
| BDH2      | rs2711897  | 4  | 103102410 | T | C | 0.387  | 0.2   | 5.2481E-138 | 0.00799805  | 35559 | 625.27  |
| GRAMD1C   | rs2712339  | 3  | 113913896 | T | C | 0.4054 | -0.17 | 4.16869E-65 | 0.009976702 | 35559 | 290.34  |
| RPE       | rs2723211  | 2  | 210015768 | A | G | 0.4327 | 0.08  | 8.12831E-21 | 0.008548862 | 35559 | 87.57   |
| NID1      | rs2734807  | 1  | 236098248 | T | C | 0.4178 | -0.13 | 2.34423E-53 | 0.008454322 | 35559 | 236.43  |
| MIF       | rs2739338  | 22 | 23954943  | T | C | 0.4518 | 0.07  | 4.57088E-18 | 0.00807978  | 35559 | 75.05   |
| CTSB      | rs2740592  | 8  | 11843744  | G | A | 0.2508 | 0.61  | 1E-200      | 0.015857581 | 35559 | 1479.66 |
| KIAA1549L | rs2753408  | 11 | 33378145  | A | G | 0.4799 | -0.32 | 1E-200      | 0.008318731 | 35559 | 1479.66 |
| ASPN      | rs2761681  | 9  | 92424655  | G | A | 0.3681 | -0.39 | 1E-200      | 0.010138453 | 35559 | 1479.66 |
| CD5L      | rs2765501  | 1  | 157834858 | A | G | 0.4669 | 0.3   | 1E-200      | 0.008319867 | 35559 | 1300.13 |
| EFNB2     | rs2774201  | 13 | 106923163 | C | T | 0.3735 | 0.06  | 1.31826E-12 | 0.008459785 | 35559 | 50.3    |
| ARG1      | rs2781668  | 6  | 131576138 | T | C | 0.1932 | -0.11 | 3.71535E-29 | 0.009814214 | 35559 | 125.62  |
| CBLN1     | rs27817    | 16 | 49422380  | A | G | 0.0244 | -0.5  | 3.80189E-69 | 0.028448852 | 35559 | 308.88  |
| TAGLN2    | rs2789422  | 1  | 159922298 | A | G | 0.3962 | -0.09 | 2.18776E-29 | 0.007996432 | 35559 | 126.67  |
| C4BPA     | rs2808467  | 1  | 207100456 | T | G | 0.1536 | 0.15  | 6.91831E-13 | 0.020888339 | 35559 | 51.56   |
| SH3BGRL2  | rs2812679  | 6  | 79616293  | C | T | 0.4541 | -0.1  | 7.94328E-35 | 0.008123082 | 35559 | 151.54  |
| ICAM5     | rs281439   | 19 | 10289434  | G | C | 0.2083 | -0.81 | 1E-200      | 0.021056788 | 35559 | 1479.66 |
| HSPA13    | rs2822638  | 21 | 14372785  | C | T | 0.2251 | 0.11  | 1.51356E-30 | 0.009575102 | 35559 | 131.97  |
| NCAM2     | rs2826851  | 21 | 21463626  | G | A | 0.2663 | 0.46  | 1E-200      | 0.011958176 | 35559 | 1479.66 |
| ADH1C     | rs283415   | 4  | 99349450  | T | C | 0.4861 | 0.13  | 2.51189E-55 | 0.008297281 | 35559 | 245.47  |
| FAM3B     | rs2838012  | 21 | 41322943  | A | G | 0.0485 | -0.5  | 5.3703E-142 | 0.019708108 | 35559 | 643.61  |
| MMP12     | rs28381684 | 11 | 102866461 | T | A | 0.1054 | -0.71 | 1E-200      | 0.018457184 | 35559 | 1479.66 |
| APCS      | rs28383573 | 1  | 159588882 | T | G | 0.139  | 0.21  | 1.41254E-72 | 0.011655142 | 35559 | 324.62  |
| TFF3      | rs2839493  | 21 | 42375588  | A | G | 0.0951 | -0.12 | 6.91831E-18 | 0.013927174 | 35559 | 74.24   |

|          |            |    |           |   |   |        |       |             |             |       |         |
|----------|------------|----|-----------|---|---|--------|-------|-------------|-------------|-------|---------|
| COCH     | rs28400019 | 14 | 30874288  | A | G | 0.1195 | 0.44  | 1E-200      | 0.012970174 | 35559 | 1150.77 |
| SMAP1    | rs2842061  | 6  | 70634174  | A | G | 0.2552 | -0.32 | 1E-200      | 0.009209129 | 35559 | 1207.36 |
| DHX58    | rs28459794 | 17 | 42166278  | G | A | 0.1003 | -0.09 | 6.91831E-11 | 0.013798565 | 35559 | 42.54   |
| B3GNT8   | rs284663   | 19 | 41426707  | C | T | 0.4327 | -0.82 | 1E-200      | 0.021316748 | 35559 | 1479.66 |
| COLEC12  | rs2846666  | 18 | 469797    | C | A | 0.2416 | -0.16 | 6.76083E-56 | 0.010158088 | 35559 | 248.08  |
| SNX8     | rs28514741 | 7  | 2249281   | C | T | 0.0047 | -0.63 | 3.89045E-26 | 0.059574288 | 35559 | 111.83  |
| ANG      | rs28535078 | 14 | 20676917  | A | G | 0.2211 | 0.56  | 1E-200      | 0.014557779 | 35559 | 1479.66 |
| S100A2   | rs28548347 | 1  | 153548542 | C | A | 0.0433 | -0.21 | 1.86209E-27 | 0.019343668 | 35559 | 117.85  |
| BTC      | rs28549760 | 4  | 74794307  | C | A | 0.0947 | -0.21 | 1.86209E-52 | 0.013777758 | 35559 | 232.3   |
| CHAD     | rs28590506 | 17 | 50457426  | A | G | 0.3235 | -0.06 | 4.36516E-10 | 0.009614803 | 35559 | 38.94   |
| GLCE     | rs28638321 | 15 | 69258831  | C | T | 0.2354 | -0.62 | 1E-200      | 0.016117541 | 35559 | 1479.66 |
| ADAMTS13 | rs28647808 | 9  | 133440409 | G | C | 0.106  | -0.88 | 1E-200      | 0.02287651  | 35559 | 1479.66 |
| CCL17    | rs28695417 | 16 | 57410006  | A | G | 0.0746 | 0.4   | 7.5858E-138 | 0.016005518 | 35559 | 624.53  |
| IGF1R    | rs2872060  | 15 | 98956264  | T | G | 0.476  | -0.06 | 2.0893E-13  | 0.008171098 | 35559 | 53.92   |
| ADH6     | rs28730617 | 4  | 99078444  | A | G | 0.0456 | -0.36 | 5.24807E-79 | 0.019129306 | 35559 | 354.15  |
| NTRK3    | rs28735437 | 15 | 87971624  | C | G | 0.1164 | 0.24  | 6.45654E-73 | 0.013288253 | 35559 | 326.18  |
| SLITRK1  | rs2876803  | 13 | 83794650  | A | T | 0.1531 | 0.08  | 7.4131E-14  | 0.010694702 | 35559 | 55.95   |
| FRZB     | rs288326   | 2  | 182838608 | A | G | 0.0845 | 0.54  | 1E-200      | 0.015071544 | 35559 | 1283.65 |
| IL1RAP   | rs2885373  | 3  | 190628679 | T | C | 0.1427 | 1.42  | 1E-200      | 0.036914369 | 35559 | 1479.66 |
| ADH5     | rs28894371 | 4  | 99083469  | A | G | 0.046  | -0.36 | 1.41254E-77 | 0.019309154 | 35559 | 347.58  |
| HIBCH    | rs291466   | 2  | 190319749 | A | G | 0.3892 | -0.33 | 1E-200      | 0.008578691 | 35559 | 1479.66 |
| PNLIPRP1 | rs2915766  | 10 | 116593741 | C | T | 0.4739 | -0.15 | 4.36516E-70 | 0.008475661 | 35559 | 313.19  |
| C1QC     | rs292004   | 1  | 22667221  | G | A | 0.0752 | 0.36  | 3.8905E-127 | 0.015008737 | 35559 | 575.3   |
| B4GALT2  | rs2993619  | 1  | 43989531  | T | C | 0.0854 | -0.09 | 1.54882E-10 | 0.014061429 | 35559 | 40.96   |
| TINAGL1  | rs3008406  | 1  | 31573186  | G | A | 0.475  | 0.08  | 1.34896E-12 | 0.011284782 | 35559 | 50.25   |
| REG4     | rs3009182  | 1  | 119836055 | C | T | 0.2212 | 0.14  | 2.39883E-46 | 0.009794594 | 35559 | 204.3   |
| MCF2L    | rs3011487  | 13 | 112924107 | C | T | 0.4849 | 0.21  | 6.9183E-149 | 0.008080915 | 35559 | 675.29  |
| S100A7   | rs3014837  | 1  | 153458930 | C | G | 0.054  | 1.82  | 1E-200      | 0.047312783 | 35559 | 1479.66 |
| S100A12  | rs3014874  | 1  | 153365467 | A | G | 0.2579 | -0.22 | 1.5488E-115 | 0.009629078 | 35559 | 521.98  |
| CD8A     | rs3020726  | 2  | 86789383  | G | A | 0.1957 | 0.4   | 1E-200      | 0.010398414 | 35559 | 1479.66 |
| STAMBPL1 | rs303510   | 10 | 88704397  | T | C | 0.3763 | 0.05  | 8.51138E-11 | 0.007702649 | 35559 | 42.13   |
| NUDCD3   | rs306995   | 7  | 44500230  | A | G | 0.2734 | 0.08  | 3.16228E-17 | 0.009478213 | 35559 | 71.24   |
| HK2      | rs3100578  | 2  | 74817573  | A | G | 0.3104 | 0.06  | 1E-13       | 0.008063538 | 35559 | 55.36   |
| F2       | rs3136516  | 11 | 46739206  | G | A | 0.4379 | 0.11  | 4.67735E-41 | 0.008197308 | 35559 | 150.76  |
| EPHB4    | rs314366   | 7  | 100818887 | G | A | 0.4914 | -0.11 | 7.24436E-42 | 0.008114146 | 35559 | 183.77  |

|         |            |    |           |   |   |        |       |             |             |       |         |
|---------|------------|----|-----------|---|---|--------|-------|-------------|-------------|-------|---------|
| CROT    | rs31658    | 7  | 87409825  | T | C | 0.1361 | -0.55 | 1E-200      | 0.014297819 | 35559 | 1479.66 |
| ITPKA   | rs316617   | 15 | 41503702  | C | T | 0.3779 | 0.07  | 4.2658E-18  | 0.00807245  | 35559 | 75.19   |
| CD7     | rs3176831  | 17 | 82314615  | T | C | 0.0412 | -0.45 | 9.3325E-117 | 0.019590895 | 35559 | 527.58  |
| PTN     | rs320682   | 7  | 137353346 | C | T | 0.4471 | 0.19  | 2.0417E-123 | 0.008041696 | 35559 | 558.2   |
| LARGE   | rs3210587  | 22 | 33920089  | A | G | 0.3441 | 0.11  | 4.89779E-40 | 0.008305747 | 35559 | 175.39  |
| F10     | rs3211717  | 13 | 113122635 | A | C | 0.4189 | -0.1  | 1.7378E-33  | 0.008292529 | 35559 | 145.41  |
| SEMA6A  | rs33069    | 5  | 116437223 | A | C | 0.2767 | -0.08 | 3.31131E-17 | 0.009484263 | 35559 | 71.15   |
| VNN2    | rs33980664 | 6  | 132752705 | T | C | 0.033  | -0.82 | 1E-200      | 0.02324325  | 35559 | 1244.54 |
| IL5RA   | rs340827   | 3  | 3066046   | A | G | 0.4646 | 0.2   | 2.7542E-123 | 0.008469477 | 35559 | 557.6   |
| CHRD    | rs34095724 | 3  | 184381262 | T | C | 0.0538 | -0.19 | 7.07946E-27 | 0.017701447 | 35559 | 115.2   |
| CCL23   | rs34111696 | 17 | 36023622  | G | A | 0.0437 | -0.21 | 2.18776E-13 | 0.028622869 | 35559 | 53.83   |
| SMAD1   | rs34180190 | 4  | 145455828 | G | A | 0.4073 | 0.05  | 1.77828E-09 | 0.008309976 | 35559 | 36.2    |
| CCL8    | rs34202026 | 17 | 34320338  | T | A | 0.0192 | -0.94 | 1E-200      | 0.026345425 | 35559 | 1184.04 |
| CCL7    | rs34202026 | 17 | 34320338  | T | A | 0.0192 | 0.99  | 1E-200      | 0.028770029 | 35559 | 1184.04 |
| FLT4    | rs34221241 | 5  | 180630293 | C | T | 0.1351 | -0.19 | 3.54813E-58 | 0.011816234 | 35559 | 258.54  |
| NUDT12  | rs34226    | 5  | 103526071 | A | G | 0.2193 | 0.11  | 7.4131E-30  | 0.009691598 | 35559 | 128.82  |
| KDR     | rs34231037 | 4  | 55106779  | G | A | 0.0229 | -0.89 | 1E-200      | 0.027121392 | 35559 | 1076.79 |
| MFGE8   | rs34239095 | 15 | 88912537  | G | C | 0.282  | 0.26  | 6.7608E-179 | 0.009116647 | 35559 | 813.3   |
| PMM2    | rs34258285 | 16 | 8813057   | C | A | 0.0186 | -0.33 | 1.86209E-27 | 0.030397192 | 35559 | 117.85  |
| GPC5    | rs342706   | 13 | 91764804  | C | T | 0.2549 | -0.55 | 1E-200      | 0.014297819 | 35559 | 1479.66 |
| MATN2   | rs34302865 | 8  | 97932698  | C | G | 0.0273 | 0.26  | 4.16869E-26 | 0.024601283 | 35559 | 111.69  |
| F13B    | rs34331968 | 1  | 196690623 | C | T | 0.4635 | -0.08 | 7.07946E-19 | 0.009015468 | 35559 | 78.74   |
| GMPR2   | rs34354104 | 14 | 24238273  | A | G | 0.0589 | -0.5  | 3.02E-185   | 0.017225456 | 35559 | 842.51  |
| PLXNC1  | rs34565975 | 12 | 94209630  | C | G | 0.007  | 0.5   | 1.77828E-24 | 0.048968891 | 35559 | 104.25  |
| CRYGD   | rs34570682 | 2  | 208114213 | A | G | 0.3343 | -0.12 | 4.89779E-44 | 0.008621684 | 35559 | 193.71  |
| IDH1    | rs34599179 | 2  | 208243577 | C | T | 0.0076 | -1.07 | 1.6596E-115 | 0.046838522 | 35559 | 521.84  |
| NPNT    | rs34712979 | 4  | 105897896 | A | G | 0.244  | -0.2  | 2.0417E-100 | 0.009401817 | 35559 | 452.49  |
| DAPK2   | rs34772505 | 15 | 63984573  | T | C | 0.4174 | 0.26  | 1E-200      | 0.008127601 | 35559 | 1023.29 |
| CD72    | rs34791102 | 9  | 35612981  | A | G | 0.0697 | 0.23  | 6.0256E-47  | 0.015983911 | 35559 | 207.05  |
| ALDH1A1 | rs348452   | 9  | 72938469  | T | C | 0.2399 | 0.1   | 1.38038E-27 | 0.009188156 | 35559 | 118.45  |
| CNN1    | rs34912772 | 19 | 11566330  | C | T | 0.4613 | -0.06 | 4.36516E-14 | 0.007947415 | 35559 | 56.99   |
| ACAN    | rs34949187 | 15 | 88843421  | A | G | 0.1638 | -0.14 | 1.47911E-39 | 0.010637815 | 35559 | 173.19  |
| PVRL4   | rs34990628 | 1  | 161097295 | T | C | 0.159  | -0.08 | 2.75423E-13 | 0.010950058 | 35559 | 53.37   |
| IL27RA  | rs35026308 | 19 | 14042481  | C | T | 0.1688 | -1.02 | 1E-200      | 0.026515955 | 35559 | 1479.66 |
| BTD     | rs35034250 | 3  | 15645027  | T | C | 0.0351 | -0.7  | 1E-200      | 0.021415317 | 35559 | 1068.37 |

|           |            |    |           |   |   |        |       |             |             |       |         |
|-----------|------------|----|-----------|---|---|--------|-------|-------------|-------------|-------|---------|
| BIN1      | rs35103166 | 2  | 127124606 | C | T | 0.3495 | 0.13  | 1.20226E-54 | 0.008350497 | 35559 | 242.35  |
| APOA5     | rs35120633 | 11 | 116784884 | A | G | 0.0538 | 1.26  | 1E-200      | 0.032755003 | 35559 | 1479.66 |
| APOE      | rs35136575 | 19 | 44935906  | G | C | 0.285  | -0.2  | 8.51138E-96 | 0.009630415 | 35559 | 156.99  |
| PSG5      | rs35136575 | 19 | 44935906  | G | C | 0.285  | -0.11 | 5.12861E-36 | 0.008779064 | 35559 | 156.99  |
| CXCL5     | rs352045   | 4  | 73998970  | T | G | 0.1532 | 0.2   | 2.75423E-73 | 0.011044823 | 35559 | 327.88  |
| CLSTN2    | rs35220837 | 3  | 139904479 | A | G | 0.0758 | 0.41  | 1.9498E-160 | 0.015190953 | 35559 | 728.41  |
| MMP8      | rs35231465 | 11 | 102713404 | A | G | 0.0227 | -0.68 | 1.122E-139  | 0.027027932 | 35559 | 632.95  |
| THBS2     | rs35239983 | 6  | 168901700 | A | G | 0.1559 | 0.08  | 6.45654E-14 | 0.010668838 | 35559 | 56.22   |
| ADAMTSL1  | rs35264941 | 9  | 18626299  | C | G | 0.0197 | -0.68 | 8.9125E-120 | 0.029222093 | 35559 | 541.47  |
| CD48      | rs352684   | 1  | 160711985 | A | G | 0.4035 | -0.2  | 1.0471E-117 | 0.008671256 | 35559 | 531.95  |
| EBI3      | rs353696   | 19 | 4242508   | C | T | 0.2755 | -1.12 | 1E-200      | 0.029115559 | 35559 | 1479.66 |
| KLB       | rs35372803 | 4  | 39446966  | T | C | 0.0596 | -0.64 | 1E-200      | 0.017047868 | 35559 | 1409.27 |
| CXCL16    | rs35383686 | 17 | 4720161   | A | G | 0.2314 | -0.18 | 3.63078E-73 | 0.009948702 | 35559 | 327.33  |
| RNASE6    | rs35400387 | 14 | 20779552  | C | T | 0.3139 | -0.09 | 2.23872E-22 | 0.009249432 | 35559 | 94.67   |
| LILRA4    | rs35407007 | 19 | 54339147  | A | G | 0.0641 | -0.32 | 1.90546E-74 | 0.017529924 | 35559 | 333.21  |
| WFDC5     | rs35456522 | 20 | 45098802  | C | G | 0.2745 | -0.06 | 6.0256E-11  | 0.009169963 | 35559 | 42.81   |
| RETN      | rs35547567 | 19 | 7669115   | T | C | 0.0077 | 0.5   | 5.62341E-24 | 0.049513507 | 35559 | 101.97  |
| COL6A2    | rs35548026 | 21 | 46132295  | A | G | 0.0933 | -0.39 | 2.4547E-172 | 0.013935899 | 35559 | 783.13  |
| CA8       | rs35552143 | 8  | 60276129  | A | G | 0.4112 | 0.42  | 1E-200      | 0.010918334 | 35559 | 1479.66 |
| QPCT      | rs35576045 | 2  | 37343036  | G | T | 0.0554 | -0.12 | 5.12861E-10 | 0.019307759 | 35559 | 38.63   |
| TNFRSF11B | rs35617243 | 8  | 118875882 | C | T | 0.2959 | -0.11 | 4.7863E-32  | 0.009335624 | 35559 | 138.83  |
| LYPD3     | rs35681564 | 19 | 43455236  | A | G | 0.2078 | 0.14  | 7.58578E-45 | 0.00996364  | 35559 | 197.42  |
| CMPK1     | rs35687416 | 1  | 47368537  | T | G | 0.0649 | -0.17 | 1.41254E-25 | 0.016262536 | 35559 | 109.27  |
| VWA2      | rs35716048 | 10 | 114288519 | G | A | 0.0375 | -0.42 | 4.36516E-85 | 0.021486546 | 35559 | 382.07  |
| TRIM3     | rs35717222 | 11 | 6462533   | A | G | 0.1831 | -0.14 | 2.95121E-39 | 0.010680252 | 35559 | 171.82  |
| PENK      | rs35775010 | 8  | 56924337  | C | T | 0.1279 | -0.13 | 2.63027E-28 | 0.01178216  | 35559 | 121.73  |
| PSAPL1    | rs35791045 | 4  | 7425380   | G | A | 0.1781 | 0.44  | 1E-200      | 0.011438255 | 35559 | 1479.66 |
| RAD23B    | rs35827173 | 9  | 107327437 | C | T | 0.2099 | 0.06  | 1.07152E-10 | 0.00929296  | 35559 | 41.68   |
| COL6A2    | rs35881321 | 21 | 46112542  | A | G | 0.0208 | 0.36  | 6.30957E-37 | 0.028357804 | 35559 | 161.15  |
| LEFTY2    | rs360058   | 1  | 225889219 | T | G | 0.3981 | -0.18 | 9.7724E-102 | 0.008405489 | 35559 | 458.56  |
| LEFTY2    | rs360059   | 1  | 225889432 | A | G | 0.3981 | -0.71 | 1E-200      | 0.018457184 | 35559 | 1479.66 |
| RSPO1     | rs36043533 | 1  | 37613845  | G | T | 0.0414 | 0.44  | 1.5488E-102 | 0.020464887 | 35559 | 462.23  |
| CHGB      | rs36054946 | 20 | 5886044   | C | T | 0.0143 | -0.29 | 1.44544E-16 | 0.035105014 | 35559 | 68.24   |
| EPHA2     | rs36086195 | 1  | 16184399  | C | T | 0.43   | 0.14  | 1.28825E-62 | 0.008382717 | 35559 | 278.91  |
| VAV1      | rs36097961 | 19 | 6850756   | T | C | 0.0987 | -0.11 | 1.41254E-16 | 0.013311267 | 35559 | 68.28   |

|           |            |    |           |   |   |        |       |             |             |       |         |
|-----------|------------|----|-----------|---|---|--------|-------|-------------|-------------|-------|---------|
| FLRT2     | rs36101989 | 14 | 85343485  | T | G | 0.2813 | -0.27 | 1.7783E-199 | 0.008960203 | 35559 | 907.96  |
| CPN2      | rs3732477  | 3  | 194341790 | T | C | 0.2299 | -0.5  | 1E-200      | 0.012998017 | 35559 | 1479.66 |
| TXNDC15   | rs3733897  | 5  | 134887903 | G | A | 0.1257 | 0.47  | 1E-200      | 0.01222386  | 35559 | 1478.27 |
| ECM1      | rs3737240  | 1  | 150510879 | T | C | 0.3406 | -0.67 | 1E-200      | 0.017417343 | 35559 | 1479.66 |
| FGR       | rs3737801  | 1  | 27634321  | G | C | 0.0673 | -0.27 | 9.77237E-62 | 0.01628498  | 35559 | 274.87  |
| IMPAD1    | rs3739364  | 8  | 56960589  | C | T | 0.0991 | -0.22 | 3.01995E-51 | 0.014609349 | 35559 | 226.76  |
| CDON      | rs3740910  | 11 | 126019778 | G | A | 0.077  | -0.66 | 1E-200      | 0.017157383 | 35559 | 1479.66 |
| PSME1     | rs3742500  | 14 | 24142769  | T | G | 0.2505 | 0.06  | 1.38038E-10 | 0.009348646 | 35559 | 41.19   |
| GFER      | rs3743846  | 16 | 2000345   | G | A | 0.2039 | -0.07 | 4.46684E-11 | 0.010625859 | 35559 | 43.4    |
| RETN      | rs3745368  | 19 | 7670411   | A | G | 0.0386 | -0.67 | 6.6069E-192 | 0.022673592 | 35559 | 873.14  |
| LILRB3    | rs3745410  | 19 | 54217027  | G | A | 0.0662 | 1.64  | 1E-200      | 0.042633496 | 35559 | 1479.66 |
| KLK12     | rs3745540  | 19 | 51031874  | A | G | 0.4185 | 0.14  | 4.16869E-63 | 0.008349131 | 35559 | 281.16  |
| PLA2R1    | rs3749117  | 2  | 160028931 | T | C | 0.4524 | 0.76  | 1E-200      | 0.019756986 | 35559 | 1479.66 |
| RNASET2   | rs3756838  | 6  | 166957763 | A | G | 0.1938 | 0.3   | 4.8978E-196 | 0.010043683 | 35559 | 892.14  |
| TPP1      | rs3758978  | 11 | 6620437   | G | C | 0.4111 | 0.13  | 1.69824E-52 | 0.008525724 | 35559 | 232.49  |
| CINP      | rs3759562  | 14 | 102365480 | G | A | 0.2676 | -0.06 | 4.89779E-10 | 0.009642667 | 35559 | 38.72   |
| KLK14     | rs3760739  | 19 | 51035305  | T | G | 0.3502 | -0.06 | 7.76247E-11 | 0.009223486 | 35559 | 42.31   |
| TFF1      | rs3761376  | 21 | 42366929  | A | G | 0.2481 | -0.38 | 1E-200      | 0.009878493 | 35559 | 1479.66 |
| OBP2B     | rs3761822  | 9  | 133210436 | G | A | 0.1997 | -0.37 | 1E-200      | 0.010326799 | 35559 | 1283.65 |
| B4GALT2   | rs3762423  | 1  | 43979995  | C | T | 0.0304 | -0.55 | 1.7378E-127 | 0.022898018 | 35559 | 576.91  |
| MAPK9     | rs3763131  | 5  | 180307312 | C | T | 0.2005 | 0.18  | 1.12202E-75 | 0.009778069 | 35559 | 338.86  |
| CHIT1     | rs3766537  | 1  | 203226749 | T | G | 0.205  | 0.17  | 1.7378E-67  | 0.009794165 | 35559 | 301.26  |
| CHIT1     | rs3766568  | 1  | 203131901 | A | G | 0.3148 | 0.14  | 2.34423E-66 | 0.00813612  | 35559 | 296.07  |
| IGF2R     | rs3777399  | 6  | 160092761 | A | G | 0.1078 | 0.59  | 1E-200      | 0.01533766  | 35559 | 1479.66 |
| LAG3      | rs3782735  | 12 | 6775910   | G | A | 0.3827 | -0.13 | 7.94328E-52 | 0.008582618 | 35559 | 229.42  |
| MAPRE2    | rs3786314  | 18 | 35140225  | G | A | 0.4566 | -0.15 | 1.20226E-73 | 0.008262818 | 35559 | 329.54  |
| SERPINA10 | rs3790037  | 14 | 94284671  | A | C | 0.1997 | 0.85  | 2.29087E-20 | 0.09191341  | 35559 | 85.52   |
| SCUBE3    | rs3800403  | 6  | 35170473  | A | G | 0.138  | -0.27 | 4.0738E-122 | 0.011489337 | 35559 | 552.22  |
| PDIA5     | rs3804749  | 3  | 123114156 | C | T | 0.3447 | 0.63  | 1E-200      | 0.016377502 | 35559 | 1479.66 |
| C7        | rs380649   | 5  | 41263747  | A | G | 0.3019 | 0.27  | 1.3183E-191 | 0.009144348 | 35559 | 871.76  |
| MAPK3     | rs3809627  | 16 | 30091839  | A | C | 0.4224 | 0.08  | 6.91831E-11 | 0.012265391 | 35559 | 42.54   |
| STX7      | rs3813356  | 6  | 132513379 | T | C | 0.3747 | -0.12 | 7.94328E-46 | 0.008444761 | 35559 | 201.91  |
| FOXO3     | rs3813498  | 6  | 108622962 | C | T | 0.1804 | 0.06  | 9.77237E-10 | 0.009815013 | 35559 | 37.37   |
| PDGFRB    | rs3816018  | 5  | 150128912 | C | T | 0.4783 | -1.18 | 1E-200      | 0.030675321 | 35559 | 1479.66 |
| MYBPC1    | rs3817552  | 12 | 101651385 | G | C | 0.1536 | -0.11 | 1.99526E-20 | 0.011875724 | 35559 | 85.79   |

|          |            |    |           |   |   |        |       |             |             |       |         |
|----------|------------|----|-----------|---|---|--------|-------|-------------|-------------|-------|---------|
| BPIFA2   | rs3818222  | 20 | 33225117  | G | A | 0.4925 | 0.08  | 6.91831E-21 | 0.008533344 | 35559 | 87.89   |
| MANSC1   | rs3825259  | 12 | 12343701  | G | A | 0.0955 | 0.38  | 2.6915E-166 | 0.013825985 | 35559 | 755.35  |
| TMEM132B | rs3825381  | 12 | 125652317 | T | C | 0.2584 | -0.16 | 2.5704E-68  | 0.0091603   | 35559 | 305.07  |
| LGALS3BP | rs3826311  | 17 | 78975444  | C | T | 0.2027 | 0.2   | 4.7863E-81  | 0.01048956  | 35559 | 363.51  |
| SERPINB8 | rs3826616  | 18 | 63987229  | A | G | 0.4142 | 0.18  | 2.3442E-108 | 0.008139828 | 35559 | 488.98  |
| NUCB1    | rs3826817  | 19 | 48898187  | T | C | 0.2678 | -0.14 | 1.34896E-56 | 0.008831362 | 35559 | 251.29  |
| PTK7     | rs3828755  | 6  | 43147482  | G | A | 0.4627 | 0.08  | 1.04713E-24 | 0.007795887 | 35559 | 105.3   |
| IGFBP1   | rs3828998  | 7  | 45889209  | C | T | 0.3879 | -0.08 | 3.63078E-21 | 0.008472097 | 35559 | 89.16   |
| PLA2G12B | rs3829126  | 10 | 72954419  | T | G | 0.0978 | -0.15 | 1.28825E-27 | 0.01377427  | 35559 | 118.58  |
| TXNDC5   | rs383084   | 6  | 7899424   | T | C | 0.3662 | -0.12 | 5.12861E-46 | 0.008426612 | 35559 | 202.78  |
| CD177    | rs3896477  | 19 | 43188786  | C | A | 0.0115 | -0.57 | 4.89779E-63 | 0.034012326 | 35559 | 280.84  |
| IL1RL2   | rs3917265  | 2  | 102162001 | T | C | 0.44   | 0.16  | 2.39883E-83 | 0.008272322 | 35559 | 374.08  |
| SELL     | rs3917775  | 1  | 169601838 | C | T | 0.4356 | -0.24 | 1.0233E-193 | 0.008083437 | 35559 | 881.47  |
| VEGFA    | rs3929925  | 6  | 43971636  | A | G | 0.4991 | -0.11 | 1.58489E-39 | 0.008361599 | 35559 | 173.05  |
| MTHFSD   | rs3950702  | 16 | 86534448  | T | C | 0.399  | -0.32 | 1E-200      | 0.008318731 | 35559 | 1479.66 |
| WFDC1    | rs400345   | 16 | 84294888  | T | C | 0.21   | -0.44 | 1E-200      | 0.011438255 | 35559 | 1479.66 |
| LILRA5   | rs4022330  | 19 | 54277989  | C | T | 0.4012 | 0.09  | 3.01995E-17 | 0.010656196 | 35559 | 54.41   |
| B3GNT2   | rs4073090  | 2  | 62336639  | G | A | 0.4475 | 0.16  | 1.86209E-86 | 0.008118768 | 35559 | 388.36  |
| GLB1     | rs4075736  | 3  | 32993106  | A | G | 0.1964 | 0.06  | 3.46737E-11 | 0.009056306 | 35559 | 43.89   |
| S100A4   | rs41265162 | 1  | 153547662 | T | C | 0.0446 | 0.21  | 3.54813E-27 | 0.019449465 | 35559 | 116.57  |
| CTSS     | rs41271951 | 1  | 150764744 | G | A | 0.0891 | -0.7  | 1E-200      | 0.018197224 | 35559 | 1479.66 |
| VEGFC    | rs41278571 | 4  | 176729712 | T | C | 0.02   | 0.4   | 1.20226E-45 | 0.028206876 | 35559 | 201.09  |
| LIPN     | rs41284092 | 10 | 88778153  | T | G | 0.0019 | -0.71 | 1.20226E-17 | 0.083014574 | 35559 | 73.14   |
| TNFSF14  | rs413141   | 19 | 6675978   | A | G | 0.142  | 0.17  | 6.91831E-51 | 0.011330354 | 35559 | 225.11  |
| MSR1     | rs41341748 | 8  | 16155085  | A | G | 0.0057 | -1.65 | 6.0256E-198 | 0.054970251 | 35559 | 900.92  |
| CCL23    | rs41341749 | 17 | 35983666  | G | A | 0.0366 | 0.61  | 3.02E-166   | 0.022197724 | 35559 | 755.12  |
| SWAP70   | rs415895   | 11 | 9748015   | C | G | 0.3551 | 0.42  | 1E-200      | 0.010918334 | 35559 | 1479.66 |
| FGG      | rs4220     | 4  | 154570607 | A | G | 0.1537 | 0.18  | 2.88403E-54 | 0.011604024 | 35559 | 240.6   |
| PTGFRN   | rs4233450  | 1  | 116947639 | G | T | 0.1744 | -0.84 | 1E-200      | 0.021836669 | 35559 | 1479.66 |
| NMT2     | rs4237446  | 10 | 15199924  | C | T | 0.1965 | 0.08  | 1.1749E-13  | 0.010782277 | 35559 | 55.05   |
| CCL5     | rs4239252  | 17 | 35836561  | A | G | 0.1846 | -0.26 | 1.0715E-132 | 0.010606583 | 35559 | 600.86  |
| ESM1     | rs4242051  | 5  | 54902947  | T | C | 0.2411 | -0.15 | 2.04174E-55 | 0.009565746 | 35559 | 245.88  |
| PSMB4    | rs4246527  | 1  | 151431472 | C | T | 0.1364 | -0.64 | 1E-200      | 0.016637462 | 35559 | 1479.66 |
| BRSK2    | rs4255564  | 11 | 1384495   | C | T | 0.2146 | 0.17  | 2.45471E-70 | 0.009588199 | 35559 | 314.34  |
| CST2     | rs4260306  | 20 | 23749699  | T | C | 0.255  | -0.55 | 1E-200      | 0.014297819 | 35559 | 1479.66 |



|         |            |    |           |   |   |        |       |             |             |       |         |
|---------|------------|----|-----------|---|---|--------|-------|-------------|-------------|-------|---------|
| CST1    | rs4260306  | 20 | 23749699  | T | C | 0.255  | -0.56 | 1E-200      | 0.014557779 | 35559 | 1479.66 |
| LZIC    | rs4265433  | 1  | 10065497  | A | G | 0.0224 | -0.17 | 2.63027E-10 | 0.026902405 | 35559 | 39.93   |
| PSG5    | rs429358   | 19 | 44908684  | C | T | 0.1741 | -0.34 | 1E-200      | 0.010525045 | 35559 | 1043.48 |
| IL12RB1 | rs429774   | 19 | 18075942  | C | T | 0.3049 | -0.08 | 3.46737E-20 | 0.008692422 | 35559 | 84.7    |
| REG3G   | rs430601   | 2  | 79016371  | A | T | 0.3302 | -0.34 | 1E-200      | 0.009052247 | 35559 | 1410.65 |
| NT5C3A  | rs4316067  | 7  | 33041902  | G | A | 0.2777 | -0.08 | 9.77237E-22 | 0.008351358 | 35559 | 91.76   |
| ACE     | rs4363     | 17 | 63497131  | G | A | 0.4979 | 0.62  | 1E-200      | 0.016117541 | 35559 | 1479.66 |
| RNASE6  | rs4377066  | 14 | 20718622  | T | C | 0.1251 | 0.09  | 7.76247E-13 | 0.012560561 | 35559 | 51.34   |
| UNC5C   | rs4380535  | 4  | 95428256  | T | C | 0.3607 | -0.05 | 1.65959E-10 | 0.007824808 | 35559 | 40.83   |
| OLFML3  | rs4381184  | 1  | 113947147 | A | C | 0.2987 | -0.09 | 1.38038E-24 | 0.008793262 | 35559 | 104.75  |
| QPCT    | rs4384764  | 2  | 37363141  | A | G | 0.2873 | 0.22  | 3.1623E-127 | 0.00916871  | 35559 | 575.71  |
| STARD5  | rs4392019  | 15 | 81324218  | T | C | 0.0138 | 0.71  | 2.04174E-97 | 0.033896726 | 35559 | 438.71  |
| APP     | rs439826   | 21 | 26156328  | T | G | 0.3171 | 0.08  | 7.58578E-19 | 0.009023291 | 35559 | 78.6    |
| LILRA6  | rs4405671  | 19 | 54225910  | T | C | 0.1778 | 0.38  | 1E-200      | 0.011285983 | 35559 | 1133.61 |
| TREM1   | rs4424081  | 6  | 41308053  | A | G | 0.2996 | 0.32  | 1E-200      | 0.008837848 | 35559 | 1310.94 |
| IL10RB  | rs4455239  | 21 | 33281729  | C | T | 0.4347 | 0.07  | 3.80189E-18 | 0.008060276 | 35559 | 75.42   |
| MASP1   | rs4455312  | 3  | 187244238 | A | C | 0.3215 | 0.06  | 1.51356E-10 | 0.009369141 | 35559 | 41.01   |
| PLEKHA7 | rs446518   | 11 | 16856962  | T | C | 0.1061 | 0.66  | 1E-200      | 0.017157383 | 35559 | 1479.66 |
| RGS18   | rs4495675  | 1  | 192158507 | T | G | 0.4504 | 0.06  | 7.94328E-12 | 0.008772485 | 35559 | 46.78   |
| PDCD5   | rs4499344  | 19 | 32582525  | A | G | 0.2879 | 0.2   | 3.63078E-97 | 0.009560898 | 35559 | 437.56  |
| SLITRK5 | rs4502088  | 13 | 88602637  | T | A | 0.4386 | -0.11 | 1.14815E-38 | 0.008458379 | 35559 | 169.12  |
| GLTPD2  | rs4523990  | 17 | 4725146   | A | G | 0.2462 | 0.1   | 2.13796E-26 | 0.009406448 | 35559 | 113.01  |
| ST8SIA6 | rs45462798 | 10 | 17453620  | A | T | 0.0359 | -0.13 | 1.31826E-09 | 0.021433909 | 35559 | 36.78   |
| GFRA1   | rs4550150  | 10 | 116226964 | A | G | 0.274  | 0.2   | 7.0795E-103 | 0.009286541 | 35559 | 463.8   |
| GSTO1   | rs45596840 | 10 | 104268396 | A | G | 0.3218 | -0.82 | 1E-200      | 0.021316748 | 35559 | 1479.66 |
| PSME2   | rs4575     | 14 | 24146226  | C | T | 0.3082 | 0.08  | 2.95121E-20 | 0.008676115 | 35559 | 85.02   |
| ART3    | rs4599438  | 4  | 76106989  | A | G | 0.3991 | 0.08  | 1.99526E-13 | 0.010885667 | 35559 | 54.01   |
| ARFIP1  | rs4619875  | 4  | 152779978 | T | C | 0.3724 | 0.22  | 8.5114E-154 | 0.008327655 | 35559 | 697.87  |
| ALDH3A1 | rs4646787  | 17 | 19745936  | A | G | 0.3358 | -0.13 | 6.76083E-53 | 0.00849229  | 35559 | 234.32  |
| NADK    | rs4648629  | 1  | 1764023   | A | C | 0.4504 | -0.12 | 9.12011E-53 | 0.007849027 | 35559 | 233.73  |
| ANGPTL1 | rs4650995  | 1  | 178548181 | T | C | 0.4923 | -0.3  | 1E-200      | 0.007948222 | 35559 | 1424.55 |
| PPT1    | rs4660386  | 1  | 40094562  | T | C | 0.2995 | 0.16  | 1.04713E-71 | 0.008935245 | 35559 | 320.63  |
| PEAR1   | rs4661012  | 1  | 156915699 | G | T | 0.3625 | -0.19 | 1.6982E-110 | 0.008506918 | 35559 | 498.81  |
| WIF1    | rs466104   | 12 | 64937575  | C | T | 0.4349 | -0.06 | 5.62341E-13 | 0.008322566 | 35559 | 51.97   |
| FKBP2   | rs4672     | 11 | 64242407  | A | G | 0.0878 | -0.08 | 1.34896E-09 | 0.013198153 | 35559 | 36.74   |

|          |           |    |           |   |   |        |       |             |             |       |         |
|----------|-----------|----|-----------|---|---|--------|-------|-------------|-------------|-------|---------|
| IGFBP2   | rs4674100 | 2  | 216615701 | A | G | 0.2564 | -0.06 | 1.69824E-09 | 0.009959634 | 35559 | 36.29   |
| EDAR     | rs4676225 | 2  | 108993309 | G | A | 0.2792 | -0.28 | 1E-200      | 0.009119959 | 35559 | 942.55  |
| PLXNA1   | rs4679138 | 3  | 126992227 | G | A | 0.3036 | -0.25 | 2.9512E-182 | 0.008683893 | 35559 | 828.76  |
| BOC      | rs4682481 | 3  | 113265008 | T | C | 0.1632 | 0.27  | 3.2359E-128 | 0.011208294 | 35559 | 580.26  |
| CLSTN2   | rs4683518 | 3  | 140716808 | A | G | 0.2999 | 0.13  | 4.67735E-51 | 0.008649427 | 35559 | 225.89  |
| AHSG     | rs4686790 | 3  | 186604193 | G | T | 0.2935 | -0.36 | 1E-200      | 0.009358572 | 35559 | 1479.66 |
| HGFAC    | rs4690098 | 4  | 3445429   | T | C | 0.2836 | 0.31  | 1E-200      | 0.008314635 | 35559 | 1389.99 |
| EGF      | rs4698801 | 4  | 109961320 | A | C | 0.3356 | 0.1   | 1.8197E-30  | 0.008716723 | 35559 | 131.6   |
| PPA2     | rs4699179 | 4  | 105474024 | A | G | 0.2647 | 0.1   | 3.46737E-31 | 0.00860973  | 35559 | 134.9   |
| TIMD4    | rs4704826 | 5  | 156965071 | C | A | 0.3579 | 0.24  | 1.0471E-168 | 0.008668834 | 35559 | 766.44  |
| CD109    | rs4708089 | 6  | 73804430  | G | A | 0.4312 | 0.52  | 1E-200      | 0.013517938 | 35559 | 1479.66 |
| PCSK9    | rs472495  | 1  | 55055640  | G | T | 0.3573 | -0.14 | 3.63078E-61 | 0.008484524 | 35559 | 272.26  |
| EPHA1    | rs4725617 | 7  | 143400007 | A | G | 0.101  | -1.2  | 1E-200      | 0.031195241 | 35559 | 1479.66 |
| AOC1     | rs4725938 | 7  | 150763916 | A | G | 0.3857 | 0.3   | 1E-200      | 0.00779881  | 35559 | 1479.66 |
| GSR      | rs4733505 | 8  | 30695913  | A | G | 0.339  | -0.1  | 1.02329E-33 | 0.008262693 | 35559 | 146.46  |
| FJX1     | rs474415  | 11 | 35621175  | A | G | 0.3782 | 0.12  | 9.54993E-47 | 0.008357952 | 35559 | 206.13  |
| ALDH3B1  | rs475325  | 11 | 68017592  | T | C | 0.2336 | 0.14  | 6.16595E-47 | 0.009730414 | 35559 | 207     |
| PFKM     | rs4760682 | 12 | 48118502  | C | A | 0.1931 | -0.2  | 6.30957E-90 | 0.009946403 | 35559 | 404.3   |
| LYZ      | rs4761234 | 12 | 69338325  | C | T | 0.486  | -0.49 | 1E-200      | 0.012738057 | 35559 | 1479.66 |
| ALDH2    | rs4766462 | 12 | 111433337 | T | A | 0.2714 | -0.09 | 2.95121E-21 | 0.009509273 | 35559 | 89.57   |
| MYZAP    | rs4774967 | 15 | 57563562  | T | G | 0.3458 | 0.07  | 1.90546E-18 | 0.007988361 | 35559 | 76.78   |
| SECTM1   | rs4789763 | 17 | 82331408  | G | A | 0.4804 | 0.18  | 1.0233E-114 | 0.007906934 | 35559 | 518.21  |
| CA10     | rs4793712 | 17 | 51639018  | A | G | 0.4766 | -0.11 | 1.69824E-39 | 0.00836492  | 35559 | 172.92  |
| KRT20    | rs4796667 | 17 | 41522464  | T | C | 0.3592 | 0.06  | 1.69824E-12 | 0.00850189  | 35559 | 49.8    |
| STAT3    | rs4796791 | 17 | 42378745  | T | C | 0.4114 | -0.15 | 4.2658E-78  | 0.008017988 | 35559 | 349.97  |
| CD209    | rs4804774 | 19 | 7707287   | C | G | 0.2173 | -0.36 | 1E-200      | 0.0095623   | 35559 | 1417.28 |
| TMEM190  | rs4806666 | 19 | 55376727  | T | C | 0.4569 | -1.01 | 1E-200      | 0.026255995 | 35559 | 1479.66 |
| COLGALT1 | rs4808666 | 19 | 17557324  | T | C | 0.4465 | -0.13 | 3.38844E-58 | 0.008083357 | 35559 | 258.63  |
| NCAM2    | rs4818592 | 21 | 20999767  | G | C | 0.3422 | -0.06 | 6.60693E-12 | 0.008738829 | 35559 | 47.14   |
| PDXK     | rs4818855 | 21 | 43619070  | C | T | 0.4189 | 0.13  | 6.91831E-59 | 0.008034342 | 35559 | 261.8   |
| TIMP3    | rs4821102 | 22 | 32770241  | C | A | 0.2264 | 0.78  | 1E-200      | 0.020276907 | 35559 | 1479.66 |
| CRYBB1   | rs4822754 | 22 | 26616930  | A | G | 0.3933 | 0.17  | 2.39883E-93 | 0.008294813 | 35559 | 420.01  |
| IL18RAP  | rs4851010 | 2  | 102439667 | T | A | 0.3258 | 0.08  | 1.04713E-21 | 0.008357586 | 35559 | 91.62   |
| IL1R2    | rs4851521 | 2  | 101993894 | T | C | 0.429  | -0.41 | 1E-200      | 0.010658374 | 35559 | 1479.66 |
| CETN3    | rs4873    | 5  | 90407824  | G | C | 0.289  | -0.08 | 2.13796E-19 | 0.008883011 | 35559 | 81.1    |

|           |           |    |           |   |   |        |       |             |             |       |         |
|-----------|-----------|----|-----------|---|---|--------|-------|-------------|-------------|-------|---------|
| TNFRSF11B | rs4876836 | 8  | 118434718 | G | A | 0.3947 | -0.09 | 9.12011E-25 | 0.008758995 | 35559 | 105.57  |
| GAS1      | rs4878043 | 9  | 87072939  | C | T | 0.4227 | -0.08 | 7.24436E-24 | 0.007941722 | 35559 | 101.47  |
| GLIPR2    | rs4878643 | 9  | 36153440  | C | G | 0.2907 | -0.28 | 1E-200      | 0.009161185 | 35559 | 934.09  |
| KIAA1161  | rs4879780 | 9  | 34367518  | A | G | 0.3862 | -0.12 | 7.07946E-51 | 0.007998712 | 35559 | 225.06  |
| PHPT1     | rs4880150 | 9  | 136875889 | C | T | 0.2584 | 0.21  | 1.2589E-115 | 0.009187753 | 35559 | 522.39  |
| ID11      | rs4880758 | 10 | 1039632   | G | C | 0.0687 | -0.11 | 6.16595E-11 | 0.01682045  | 35559 | 42.76   |
| TMEM132C  | rs4882694 | 12 | 128417042 | T | C | 0.459  | -0.14 | 1.65959E-62 | 0.008390313 | 35559 | 278.4   |
| ISLR2     | rs4887134 | 15 | 74317938  | A | T | 0.3653 | 0.23  | 4.6774E-158 | 0.008586506 | 35559 | 717.46  |
| IGFBP4    | rs4890114 | 17 | 40447297  | G | A | 0.4529 | 0.06  | 5.49541E-12 | 0.008705552 | 35559 | 47.5    |
| MRVI1     | rs4910165 | 11 | 10652497  | C | G | 0.3449 | 0.11  | 1.07152E-39 | 0.008342857 | 35559 | 173.83  |
| TMEM9     | rs4915486 | 1  | 201141835 | T | C | 0.3371 | 0.07  | 2.63027E-15 | 0.008852577 | 35559 | 62.52   |
| LAYN      | rs4938792 | 11 | 111550211 | C | T | 0.3765 | -0.05 | 3.31131E-10 | 0.007957406 | 35559 | 39.48   |
| TMEM132A  | rs4939474 | 11 | 60896157  | G | A | 0.4996 | -0.3  | 1E-200      | 0.008611925 | 35559 | 1213.44 |
| METTLL24  | rs4947065 | 6  | 110344779 | T | C | 0.0821 | -0.17 | 6.0256E-34  | 0.0139964   | 35559 | 147.52  |
| REN       | rs4951315 | 1  | 204188040 | A | C | 0.2614 | -0.06 | 3.89045E-10 | 0.009587175 | 35559 | 39.16   |
| HRASLS2   | rs4963424 | 11 | 63559149  | T | A | 0.331  | -0.05 | 3.54813E-10 | 0.007971034 | 35559 | 39.34   |
| AGRN      | rs4970394 | 1  | 1027511   | C | T | 0.4588 | -0.24 | 2.884E-178  | 0.008430398 | 35559 | 810.4   |
| FCRL1     | rs4971154 | 1  | 157802090 | C | T | 0.4646 | 0.38  | 1E-200      | 0.009878493 | 35559 | 1479.66 |
| CCS       | rs498045  | 11 | 66595526  | A | G | 0.4484 | -0.11 | 8.31764E-45 | 0.007832211 | 35559 | 197.24  |
| TPSAB1    | rs4984639 | 16 | 1222865   | G | A | 0.2891 | -0.51 | 1E-200      | 0.013257978 | 35559 | 1479.66 |
| DECR2     | rs4984667 | 16 | 411697    | T | C | 0.4576 | -0.23 | 1.09648E-71 | 0.012846255 | 35559 | 320.54  |
| LCT       | rs4988235 | 2  | 135851076 | G | A | 0.1707 | -1.05 | 1E-200      | 0.027295836 | 35559 | 1479.66 |
| LTF       | rs5015750 | 3  | 46457913  | A | G | 0.0866 | 0.18  | 8.31764E-38 | 0.014004958 | 35559 | 165.18  |
| TNFAIP3   | rs5029937 | 6  | 137874014 | T | G | 0.0254 | 0.4   | 2.34423E-55 | 0.025522943 | 35559 | 245.6   |
| KNR1      | rs5030062 | 3  | 186736391 | C | A | 0.3555 | 0.36  | 1E-200      | 0.009358572 | 35559 | 1479.66 |
| KNR1      | rs5030095 | 3  | 186743560 | C | G | 0.1132 | -0.37 | 3.7154E-156 | 0.013897958 | 35559 | 708.72  |
| ICAM4     | rs5030377 | 19 | 10282558  | G | A | 0.4268 | -0.09 | 4.36516E-28 | 0.008190757 | 35559 | 120.73  |
| MBL2      | rs5030737 | 10 | 52771482  | A | G | 0.0526 | -0.77 | 1E-200      | 0.020016946 | 35559 | 1479.66 |
| ARRB1     | rs504683  | 11 | 75340189  | G | A | 0.3039 | 0.08  | 9.77237E-20 | 0.008799473 | 35559 | 82.65   |
| ACADVL    | rs507506  | 17 | 7215003   | A | G | 0.4419 | 0.05  | 1.14815E-09 | 0.008213793 | 35559 | 37.05   |
| APOC1     | rs5112    | 19 | 44927023  | G | C | 0.4878 | 0.3   | 1E-200      | 0.008112761 | 35559 | 1367.35 |
| SERPINH1  | rs514887  | 11 | 75581004  | G | A | 0.4409 | -0.12 | 1.07152E-52 | 0.007854422 | 35559 | 233.4   |
| MMP1      | rs534191  | 11 | 102800966 | T | C | 0.4485 | 0.43  | 1E-200      | 0.011178295 | 35559 | 1479.66 |
| SERPINA4  | rs5511    | 14 | 94567258  | T | A | 0.2442 | 0.45  | 1E-200      | 0.011698215 | 35559 | 1479.66 |
| CRISP2    | rs555247  | 6  | 49742392  | A | G | 0.4941 | 0.56  | 1E-200      | 0.014557779 | 35559 | 1479.66 |

|          |            |    |             |   |        |       |             |             |       |         |
|----------|------------|----|-------------|---|--------|-------|-------------|-------------|-------|---------|
| TGFBR3   | rs55649112 | 1  | 91582253 T  | C | 0.1497 | 0.12  | 2.0893E-26  | 0.011285459 | 35559 | 113.06  |
| PRSS8    | rs55667375 | 16 | 31144137 T  | C | 0.2822 | 0.07  | 7.58578E-14 | 0.009361652 | 35559 | 55.91   |
| IL1RN    | rs55709272 | 2  | 113109711 C | T | 0.4887 | -0.18 | 1.5488E-111 | 0.008020849 | 35559 | 503.59  |
| ASGR1    | rs55714927 | 17 | 7176997 T   | C | 0.2117 | -0.1  | 8.12831E-17 | 0.01200573  | 35559 | 69.37   |
| NLGN1    | rs557382   | 3  | 173395769 G | T | 0.2958 | 0.13  | 2.51189E-49 | 0.008805392 | 35559 | 217.95  |
| PTPRS    | rs55763631 | 19 | 5293572 A   | C | 0.0693 | 0.2   | 3.89045E-33 | 0.016677108 | 35559 | 143.81  |
| CAMP     | rs55771110 | 3  | 47305227 A  | G | 0.1494 | 0.11  | 1.31826E-21 | 0.01152036  | 35559 | 72.55   |
| FKBP1B   | rs55788848 | 2  | 24045851 T  | C | 0.2085 | -0.26 | 1.0965E-148 | 0.010011762 | 35559 | 674.37  |
| DNAJB14  | rs55797991 | 4  | 99850238 T  | C | 0.1233 | -0.08 | 3.01995E-12 | 0.011466587 | 35559 | 48.67   |
| WFIKKN1  | rs55798945 | 16 | 619708 G    | T | 0.3602 | 0.15  | 4.46684E-70 | 0.008476282 | 35559 | 313.15  |
| TMEM132D | rs55851595 | 12 | 129595744 T | C | 0.0703 | 0.65  | 1E-200      | 0.016897422 | 35559 | 1479.66 |
| CTSD     | rs55861089 | 11 | 1762527 G   | A | 0.1135 | -0.33 | 1.3804E-142 | 0.012980026 | 35559 | 646.33  |
| SEPW1    | rs55887923 | 19 | 47773983 G  | A | 0.4797 | -0.11 | 3.80189E-43 | 0.007987722 | 35559 | 189.63  |
| SEMA5A   | rs56015217 | 5  | 9547721 T   | C | 0.0875 | 1.42  | 1E-200      | 0.036914369 | 35559 | 1479.66 |
| SEMA3E   | rs56022007 | 7  | 83639843 G  | A | 0.1322 | -0.27 | 4.16869E-57 | 0.016953186 | 35559 | 253.63  |
| FHIT     | rs56027740 | 3  | 61101142 G  | A | 0.4556 | -0.06 | 5.24807E-15 | 0.007671831 | 35559 | 61.16   |
| ENGASE   | rs56107536 | 17 | 79074958 A  | C | 0.1368 | 0.61  | 1E-200      | 0.015857581 | 35559 | 1479.66 |
| C1orf198 | rs56148170 | 1  | 230872285 G | A | 0.1296 | 0.14  | 3.98107E-33 | 0.011675832 | 35559 | 143.77  |
| DTD2     | rs56183134 | 14 | 31438588 C  | T | 0.1111 | -0.16 | 6.30957E-34 | 0.013177169 | 35559 | 147.43  |
| CFD      | rs56236063 | 19 | 859374 C    | T | 0.0278 | -0.17 | 8.12831E-11 | 0.026161064 | 35559 | 42.22   |
| SMOC2    | rs56296467 | 6  | 168463127 C | T | 0.2612 | -0.31 | 1E-200      | 0.009284366 | 35559 | 1114.79 |
| LCN1     | rs56307603 | 9  | 135514751 C | T | 0.1513 | -0.09 | 9.54993E-17 | 0.010829997 | 35559 | 69.06   |
| APOB     | rs563290   | 2  | 21065354 G  | A | 0.1402 | -0.09 | 1.99526E-13 | 0.012246376 | 35559 | 54.01   |
| TNFSF15  | rs56339337 | 9  | 114798680 G | A | 0.133  | -0.07 | 9.54993E-10 | 0.011443974 | 35559 | 37.41   |
| CTSZ     | rs56352943 | 20 | 59003365 G  | A | 0.131  | 0.11  | 3.80189E-18 | 0.012666147 | 35559 | 75.42   |
| ADAMTSL2 | rs56355857 | 9  | 133540118 G | C | 0.2395 | -0.08 | 6.45654E-15 | 0.010263394 | 35559 | 60.75   |
| PDE5A    | rs56905341 | 4  | 119655663 C | T | 0.1988 | -0.15 | 2.13796E-41 | 0.011130124 | 35559 | 181.62  |
| FCN2     | rs57136797 | 9  | 134860694 T | A | 0.1376 | -0.57 | 1E-200      | 0.01481774  | 35559 | 1479.66 |
| FCRL6    | rs57198275 | 1  | 159815106 A | G | 0.1824 | -0.15 | 3.01995E-47 | 0.010389849 | 35559 | 208.42  |
| PLXNC1   | rs57244134 | 12 | 94267442 A  | G | 0.0173 | -0.43 | 1.62181E-46 | 0.030026198 | 35559 | 205.07  |
| FBP2     | rs573212   | 9  | 94587384 C  | G | 0.1123 | -0.2  | 3.80189E-56 | 0.012668366 | 35559 | 249.23  |
| TLR1     | rs5743618  | 4  | 38797027 A  | C | 0.3482 | 0.13  | 2.0893E-53  | 0.008450226 | 35559 | 236.66  |
| CD14     | rs5744454  | 5  | 140633982 G | T | 0.3075 | -0.24 | 3.5481E-161 | 0.008871566 | 35559 | 731.81  |
| GSTT1    | rs5751792  | 22 | 24005096 G  | A | 0.4966 | -0.55 | 4.57088E-75 | 0.030001677 | 35559 | 336.05  |
| TCN2     | rs5753231  | 22 | 30607082 T  | C | 0.2069 | -0.47 | 1E-200      | 0.0125431   | 35559 | 1403.98 |

|          |            |    |           |   |   |        |       |             |             |       |         |
|----------|------------|----|-----------|---|---|--------|-------|-------------|-------------|-------|---------|
| LGALS2   | rs5756736  | 22 | 37574182  | G | A | 0.4375 | 0.21  | 3.2359E-148 | 0.008099411 | 35559 | 672.21  |
| A4GALT   | rs5758871  | 22 | 42699594  | C | T | 0.3961 | 0.08  | 1.62181E-17 | 0.009391757 | 35559 | 72.55   |
| LRRC15   | rs58182031 | 3  | 194366591 | A | G | 0.1179 | 0.46  | 1E-200      | 0.01284494  | 35559 | 1282.41 |
| NME4     | rs5841     | 16 | 400309    | T | C | 0.425  | -0.1  | 1.62181E-20 | 0.010770421 | 35559 | 86.2    |
| CD300C   | rs58440339 | 17 | 74543335  | T | C | 0.113  | 0.17  | 1E-42       | 0.012407764 | 35559 | 187.71  |
| GRN      | rs5848     | 17 | 44352876  | T | C | 0.2556 | -0.22 | 2.0417E-119 | 0.009468686 | 35559 | 539.81  |
| TEC      | rs58762758 | 4  | 48215229  | G | A | 0.4926 | 0.11  | 4.46684E-41 | 0.008195224 | 35559 | 180.15  |
| MAGI2    | rs59169073 | 7  | 79428907  | C | T | 0.1597 | 0.57  | 1E-200      | 0.01481774  | 35559 | 1479.66 |
| CEL      | rs592267   | 9  | 133065586 | T | C | 0.0237 | 0.97  | 1E-200      | 0.027680403 | 35559 | 1227.93 |
| CRHBP    | rs59271908 | 5  | 76945507  | C | T | 0.0312 | -0.5  | 7.7625E-99  | 0.023695391 | 35559 | 445.23  |
| TESC     | rs59756806 | 12 | 117041214 | C | T | 0.3676 | -0.53 | 1E-200      | 0.013777898 | 35559 | 1479.66 |
| POR      | rs59882870 | 7  | 76009103  | A | G | 0.1606 | 0.19  | 2.75423E-71 | 0.010642651 | 35559 | 250.05  |
| HSPB1    | rs59882870 | 7  | 76009103  | A | G | 0.1606 | 0.17  | 2.51189E-56 | 0.01075032  | 35559 | 250.05  |
| CCDC134  | rs5996067  | 22 | 41802533  | A | G | 0.3952 | 0.1   | 3.89045E-37 | 0.007853781 | 35559 | 162.11  |
| TCEA2    | rs6011275  | 20 | 64068875  | G | T | 0.3271 | -0.14 | 1.99526E-64 | 0.008260621 | 35559 | 287.21  |
| UNC5B    | rs60127485 | 10 | 71312789  | C | G | 0.0361 | -0.33 | 2.51189E-45 | 0.023355984 | 35559 | 199.62  |
| CRADD    | rs60169972 | 12 | 93837506  | C | G | 0.1731 | -0.07 | 9.77237E-11 | 0.010818445 | 35559 | 41.86   |
| CBLN4    | rs6024417  | 20 | 55794632  | G | A | 0.2974 | -0.15 | 1.94984E-61 | 0.00906995  | 35559 | 273.49  |
| BPI      | rs6024863  | 20 | 38322588  | T | A | 0.1048 | -0.31 | 1.65959E-62 | 0.01857855  | 35559 | 278.4   |
| B3GALT6  | rs60252802 | 1  | 1231507   | C | T | 0.1451 | -0.07 | 2.95121E-10 | 0.011108783 | 35559 | 39.7    |
| FAM3B    | rs60265870 | 21 | 41345040  | A | G | 0.0468 | -0.55 | 6.7608E-182 | 0.019123678 | 35559 | 827.1   |
| YWHAB    | rs6031847  | 20 | 44885562  | T | C | 0.2594 | -0.18 | 3.23594E-87 | 0.009092839 | 35559 | 391.85  |
| SPINT3   | rs6032259  | 20 | 45512691  | A | G | 0.4951 | -0.3  | 1E-200      | 0.00779881  | 35559 | 1479.66 |
| CST5     | rs6036565  | 20 | 23874077  | T | G | 0.4299 | 0.37  | 1E-200      | 0.009618533 | 35559 | 1479.66 |
| APMAP    | rs6036977  | 20 | 24921032  | C | T | 0.1192 | 0.16  | 2.34423E-38 | 0.012355047 | 35559 | 167.7   |
| SIRPG    | rs6043409  | 20 | 1635560   | A | G | 0.3178 | -0.15 | 8.51138E-70 | 0.008493731 | 35559 | 311.86  |
| PCSK2    | rs6044699  | 20 | 17249972  | A | G | 0.4986 | 0.08  | 1.31826E-24 | 0.007812831 | 35559 | 104.84  |
| ENTPD6   | rs6050446  | 20 | 25214873  | A | G | 0.0316 | -0.34 | 2.29087E-47 | 0.023519313 | 35559 | 208.97  |
| SEMA6A   | rs607350   | 5  | 116613097 | A | T | 0.2071 | -0.07 | 2.34423E-11 | 0.010474655 | 35559 | 44.66   |
| RGMB     | rs61048056 | 5  | 98439496  | A | G | 0.4396 | -0.14 | 9.77237E-67 | 0.008112262 | 35559 | 297.82  |
| FLRT3    | rs6105236  | 20 | 14267811  | C | T | 0.1671 | -0.11 | 9.33254E-35 | 0.008944847 | 35559 | 151.22  |
| CST3     | rs6114209  | 20 | 23641629  | C | G | 0.2104 | -0.25 | 1.3183E-138 | 0.009975582 | 35559 | 628.03  |
| PROC     | rs61185143 | 2  | 127407902 | T | C | 0.4284 | -0.14 | 1.69824E-70 | 0.007886955 | 35559 | 315.07  |
| SERPINA5 | rs6119     | 14 | 94587675  | G | A | 0.1011 | 0.35  | 3.7154E-149 | 0.013455828 | 35559 | 676.54  |
| SERPINA3 | rs6119     | 14 | 94587675  | G | A | 0.1011 | -0.11 | 1.41254E-14 | 0.014294593 | 35559 | 676.54  |

|          |            |    |           |   |   |        |       |             |             |       |         |
|----------|------------|----|-----------|---|---|--------|-------|-------------|-------------|-------|---------|
| BMP7     | rs6123685  | 20 | 57260984  | A | G | 0.2317 | 0.06  | 7.24436E-11 | 0.009208797 | 35559 | 42.45   |
| CR2      | rs61240730 | 1  | 207450585 | C | T | 0.1419 | -0.25 | 3.01995E-94 | 0.012138653 | 35559 | 424.15  |
| GPCPD1   | rs6133228  | 20 | 5571430   | A | G | 0.3887 | 0.07  | 2.75423E-17 | 0.008277615 | 35559 | 71.51   |
| FLRT3    | rs6135225  | 20 | 14697489  | T | G | 0.2858 | -0.54 | 1E-200      | 0.014037859 | 35559 | 1479.66 |
| SIRPA    | rs6136377  | 20 | 1915642   | G | A | 0.3595 | -1.26 | 1E-200      | 0.032755003 | 35559 | 1479.66 |
| RSPO4    | rs6140899  | 20 | 994605    | G | A | 0.0795 | -0.1  | 2.45471E-10 | 0.015798274 | 35559 | 40.06   |
| SEMA3E   | rs61729612 | 7  | 83408415  | G | C | 0.1466 | -1.05 | 1E-200      | 0.027295836 | 35559 | 1479.66 |
| CDNF     | rs61738953 | 10 | 14820083  | G | C | 0.0401 | -0.76 | 1E-200      | 0.021029045 | 35559 | 1306.06 |
| EMILIN3  | rs61739314 | 20 | 41361737  | C | G | 0.0386 | -0.67 | 1E-200      | 0.021475499 | 35559 | 973.28  |
| TPSAB1   | rs61739908 | 16 | 1256641   | T | C | 0.1953 | 0.16  | 2.23872E-43 | 0.011586361 | 35559 | 190.69  |
| LTF      | rs61740470 | 3  | 46450495  | T | C | 0.0081 | -1.11 | 6.4565E-133 | 0.045243888 | 35559 | 601.87  |
| ENTHD2   | rs61745945 | 17 | 81231621  | A | G | 0.0223 | -0.22 | 2.45471E-16 | 0.026837504 | 35559 | 67.19   |
| SVEP1    | rs61751937 | 9  | 110549951 | C | G | 0.0342 | 0.74  | 1E-200      | 0.022767849 | 35559 | 1229.4  |
| PGM1     | rs61765292 | 1  | 63647788  | G | A | 0.1796 | 0.12  | 4.36516E-29 | 0.010720071 | 35559 | 125.3   |
| ROR1     | rs61765448 | 1  | 64146145  | T | C | 0.1711 | -0.3  | 8.9125E-169 | 0.010833768 | 35559 | 766.76  |
| AKR7A2   | rs61766662 | 1  | 19330519  | C | T | 0.3241 | -0.15 | 1.8197E-68  | 0.008578107 | 35559 | 305.76  |
| LEPR     | rs61781309 | 1  | 65617112  | A | G | 0.1696 | -1.39 | 1E-200      | 0.036134488 | 35559 | 1479.66 |
| CD58     | rs61789227 | 1  | 116537006 | G | A | 0.0211 | 0.67  | 6.7608E-130 | 0.027629909 | 35559 | 587.99  |
| FCRLB    | rs61801180 | 1  | 161718974 | C | G | 0.1023 | 0.59  | 1E-200      | 0.01533766  | 35559 | 1479.66 |
| F5       | rs61808983 | 1  | 169505159 | T | C | 0.0717 | -0.65 | 1E-200      | 0.016897422 | 35559 | 1479.66 |
| CD55     | rs61822669 | 1  | 207247869 | A | G | 0.2592 | -0.41 | 1E-200      | 0.010658374 | 35559 | 1479.66 |
| GUK1     | rs61825157 | 1  | 228111751 | T | C | 0.0672 | 0.36  | 2.5704E-108 | 0.016282716 | 35559 | 488.8   |
| HTRA1    | rs61871680 | 10 | 122310940 | A | G | 0.1954 | 0.11  | 7.07946E-26 | 0.0104575   | 35559 | 110.64  |
| NCAM1    | rs61902388 | 11 | 112771352 | C | T | 0.4515 | -0.13 | 1.51356E-53 | 0.008438787 | 35559 | 237.3   |
| CD4      | rs61916271 | 12 | 6781356   | A | G | 0.2098 | -0.06 | 4.67735E-10 | 0.009631493 | 35559 | 38.81   |
| KIRREL2  | rs619833   | 19 | 35853604  | A | G | 0.0424 | -0.26 | 9.77237E-37 | 0.020536118 | 35559 | 160.28  |
| LINGO1   | rs62007781 | 15 | 77734259  | A | G | 0.386  | 0.06  | 3.98107E-13 | 0.008268787 | 35559 | 52.65   |
| CTSH     | rs62013199 | 15 | 78937302  | G | A | 0.0925 | 0.48  | 1E-200      | 0.012478097 | 35559 | 1479.66 |
| USP8     | rs62019074 | 15 | 50433826  | C | T | 0.1614 | 0.1   | 1.09648E-20 | 0.010722384 | 35559 | 86.97   |
| CBLN1    | rs62029101 | 16 | 49379117  | G | A | 0.0525 | 0.28  | 7.4131E-48  | 0.019265598 | 35559 | 211.22  |
| NPTX1    | rs62069681 | 17 | 80650902  | C | T | 0.1275 | 0.5   | 1E-200      | 0.012998017 | 35559 | 1479.66 |
| NOTUM    | rs62078699 | 17 | 81967584  | A | G | 0.0608 | 0.14  | 1.94984E-16 | 0.017021014 | 35559 | 67.65   |
| P4HB     | rs62079523 | 17 | 82394427  | A | G | 0.3523 | 0.08  | 3.54813E-14 | 0.010558869 | 35559 | 57.4    |
| SERPINF1 | rs62088172 | 17 | 1762959   | T | C | 0.3384 | -0.28 | 1E-200      | 0.008568525 | 35559 | 1067.77 |
| CD177    | rs62113716 | 19 | 43330924  | A | G | 0.0847 | -0.64 | 1E-200      | 0.016637462 | 35559 | 1479.66 |

|          |            |    |             |   |        |       |             |             |       |         |
|----------|------------|----|-------------|---|--------|-------|-------------|-------------|-------|---------|
| PRTN3    | rs62132278 | 19 | 836654 T    | C | 0.2796 | 0.43  | 1E-200      | 0.014195    | 35559 | 917.58  |
| DBI      | rs62157028 | 2  | 119387010 C | T | 0.264  | 0.08  | 1.38038E-16 | 0.009677705 | 35559 | 68.33   |
| LY75     | rs62175229 | 2  | 159821048 C | T | 0.4491 | -0.34 | 1E-200      | 0.009349608 | 35559 | 1322.35 |
| DNER     | rs62193248 | 2  | 229732201 T | A | 0.3405 | -0.18 | 6.3096E-101 | 0.008439809 | 35559 | 454.84  |
| NDRG3    | rs62210514 | 20 | 36444238 G  | A | 0.0254 | -0.22 | 1.1749E-18  | 0.024951589 | 35559 | 77.74   |
| COL6A1   | rs62215496 | 21 | 45982420 T  | C | 0.1779 | -0.07 | 1.34896E-13 | 0.009457847 | 35559 | 54.78   |
| CHL1     | rs62230378 | 3  | 382221 G    | A | 0.0308 | -0.31 | 1.51356E-39 | 0.023558275 | 35559 | 173.15  |
| CDCP1    | rs62242502 | 3  | 45068106 G  | C | 0.1287 | 0.11  | 2.69153E-18 | 0.012609266 | 35559 | 76.1    |
| CD200R1  | rs62263730 | 3  | 112859161 A | G | 0.3474 | 0.12  | 1.44544E-42 | 0.008775571 | 35559 | 186.98  |
| SLITRK3  | rs62282372 | 3  | 165194166 G | C | 0.1107 | -0.5  | 1E-200      | 0.013084062 | 35559 | 1460.26 |
| ACAP2    | rs62285629 | 3  | 195469445 A | T | 0.2343 | -0.06 | 4.0738E-10  | 0.009598198 | 35559 | 39.07   |
| HADH     | rs62311449 | 4  | 108029993 A | G | 0.065  | -0.14 | 5.88844E-18 | 0.016213661 | 35559 | 74.55   |
| HTN3     | rs62322489 | 4  | 70380070 A  | T | 0.0538 | -0.13 | 3.80189E-14 | 0.017178503 | 35559 | 57.27   |
| PDCD6    | rs62330028 | 5  | 319042 A    | G | 0.0422 | 0.14  | 2.69153E-11 | 0.021013039 | 35559 | 44.39   |
| PCSK1    | rs6235     | 5  | 96393194 G  | C | 0.2859 | -0.88 | 1E-200      | 0.02287651  | 35559 | 1479.66 |
| GHR      | rs62372052 | 5  | 42724192 G  | A | 0.1072 | -0.3  | 1.1482E-108 | 0.01354666  | 35559 | 490.4   |
| CLINT1   | rs62389053 | 5  | 157863943 T | C | 0.1464 | -0.08 | 2.04174E-11 | 0.011934942 | 35559 | 44.93   |
| THBS2    | rs62435801 | 6  | 169099069 G | A | 0.1582 | 0.08  | 5.24807E-13 | 0.011082303 | 35559 | 52.11   |
| TFPI2    | rs62466701 | 7  | 93956351 C  | T | 0.0658 | 0.11  | 1.62181E-11 | 0.01632881  | 35559 | 45.38   |
| PTN      | rs62490463 | 7  | 137499806 C | T | 0.0336 | -0.13 | 1.77828E-09 | 0.021605938 | 35559 | 36.2    |
| CPQ      | rs62508627 | 8  | 97055588 C  | G | 0.0124 | -0.32 | 1.62181E-16 | 0.038801159 | 35559 | 68.01   |
| ST3GAL1  | rs62520289 | 8  | 133539388 C | G | 0.1944 | -0.07 | 1.47911E-11 | 0.010370469 | 35559 | 45.56   |
| SFRP1    | rs62642270 | 8  | 41140689 G  | A | 0.1617 | -0.15 | 1.20226E-38 | 0.011537277 | 35559 | 169.03  |
| MGAT1    | rs634501   | 5  | 180791668 A | G | 0.258  | -0.06 | 2.81838E-12 | 0.008587997 | 35559 | 48.81   |
| ECI2     | rs634698   | 6  | 4114013 A   | T | 0.2904 | -0.43 | 1E-200      | 0.011178295 | 35559 | 1479.66 |
| KRT5     | rs641615   | 12 | 52519125 T  | G | 0.2322 | -0.16 | 1.8197E-61  | 0.009672179 | 35559 | 273.63  |
| KRT1     | rs641621   | 12 | 52519122 T  | G | 0.2322 | -0.08 | 1.28825E-16 | 0.009668073 | 35559 | 68.47   |
| SEPSECS  | rs6448333  | 4  | 25115419 T  | C | 0.0366 | -0.16 | 4.67735E-14 | 0.021218409 | 35559 | 56.86   |
| TNFRSF21 | rs6458555  | 6  | 47309833 A  | G | 0.3517 | 0.11  | 3.23594E-40 | 0.008286299 | 35559 | 176.21  |
| PLXNA4   | rs6467443  | 7  | 132553252 T | G | 0.1854 | 0.1   | 2.88403E-22 | 0.010304466 | 35559 | 94.17   |
| FAM49B   | rs6470800  | 8  | 130088714 G | T | 0.4435 | 0.05  | 6.60693E-10 | 0.008096871 | 35559 | 38.13   |
| CRAT     | rs6478861  | 9  | 129092024 C | T | 0.3161 | -0.09 | 1.1749E-25  | 0.008595229 | 35559 | 109.63  |
| DKK1     | rs6480949  | 10 | 52675662 T  | C | 0.1204 | 0.1   | 2.29087E-16 | 0.012186523 | 35559 | 67.33   |
| FGF23    | rs6489536  | 12 | 4382743 C   | G | 0.3719 | 0.05  | 3.0903E-10  | 0.007943847 | 35559 | 39.61   |
| VASN     | rs6500599  | 16 | 4424513 G   | C | 0.2854 | -0.08 | 6.91831E-17 | 0.009582653 | 35559 | 69.69   |

|          |            |    |           |   |   |        |       |             |             |       |         |
|----------|------------|----|-----------|---|---|--------|-------|-------------|-------------|-------|---------|
| NT5C3L   | rs6503667  | 17 | 41826012  | G | A | 0.2923 | 0.62  | 1E-200      | 0.016117541 | 35559 | 1479.66 |
| SIGLEC12 | rs6509544  | 19 | 51500077  | G | C | 0.1341 | 1.17  | 1E-200      | 0.03041536  | 35559 | 1479.66 |
| SHMT1    | rs651234   | 17 | 18365627  | T | C | 0.3379 | -0.66 | 1E-200      | 0.017157383 | 35559 | 1479.66 |
| LILRA5   | rs651279   | 19 | 54302487  | C | T | 0.2913 | -0.36 | 1E-200      | 0.009358572 | 35559 | 1479.66 |
| APOBEC3G | rs6519166  | 22 | 39076172  | C | A | 0.3627 | 0.12  | 1.38038E-43 | 0.008667932 | 35559 | 191.65  |
| CXCL10   | rs6532086  | 4  | 76016125  | A | G | 0.4937 | 0.08  | 1.25893E-21 | 0.00837426  | 35559 | 91.26   |
| COLEC11  | rs6542680  | 2  | 3592552   | C | T | 0.1836 | 0.86  | 1E-200      | 0.02235659  | 35559 | 1479.66 |
| MMP13    | rs655316   | 11 | 102961635 | T | C | 0.2889 | 0.06  | 1.04713E-12 | 0.008422039 | 35559 | 50.75   |
| GLRX     | rs6556885  | 5  | 95825737  | A | G | 0.2561 | -0.08 | 1.31826E-20 | 0.008595928 | 35559 | 86.61   |
| CFL2     | rs6571678  | 14 | 34716139  | G | A | 0.144  | 0.15  | 1.1749E-43  | 0.010825862 | 35559 | 191.97  |
| CYB5R2   | rs6578882  | 11 | 7578160   | A | C | 0.3522 | -0.14 | 1.1749E-60  | 0.008521221 | 35559 | 269.92  |
| CHST15   | rs6588740  | 10 | 124095824 | C | T | 0.2737 | -0.1  | 3.23594E-27 | 0.009254403 | 35559 | 116.76  |
| GAS6     | rs6602909  | 13 | 113849020 | C | T | 0.3381 | -0.26 | 1.9055E-195 | 0.008717795 | 35559 | 889.42  |
| PATE4    | rs665677   | 11 | 125882266 | A | G | 0.2521 | 0.13  | 1.38038E-44 | 0.009279993 | 35559 | 196.23  |
| CREB3L4  | rs6671362  | 1  | 153971312 | G | A | 0.4572 | 0.2   | 2.6303E-136 | 0.008048511 | 35559 | 617.45  |
| CFHR4    | rs6674110  | 1  | 196920476 | A | G | 0.0175 | -0.15 | 5.49541E-12 | 0.02176388  | 35559 | 47.5    |
| LRP8     | rs6677126  | 1  | 53241157  | C | T | 0.3073 | 0.08  | 2.13796E-13 | 0.010899371 | 35559 | 53.87   |
| FH       | rs6678766  | 1  | 241527254 | A | G | 0.2978 | -0.15 | 2.18776E-64 | 0.008853495 | 35559 | 287.03  |
| F5       | rs6678795  | 1  | 169564028 | A | G | 0.4422 | -0.13 | 1.65959E-61 | 0.007856012 | 35559 | 273.82  |
| EPHB2    | rs6686906  | 1  | 22829631  | A | G | 0.381  | 0.06  | 1.8197E-14  | 0.00783007  | 35559 | 58.71   |
| FETUB    | rs66965282 | 3  | 186640979 | G | A | 0.113  | 0.28  | 7.07946E-23 | 0.028435771 | 35559 | 96.95   |
| DNAJB4   | rs6699769  | 1  | 78038580  | G | A | 0.1848 | -0.19 | 1.31826E-77 | 0.010188924 | 35559 | 347.72  |
| RNPEP    | rs6702334  | 1  | 201985696 | A | T | 0.3535 | 0.29  | 1E-200      | 0.008502753 | 35559 | 1163.19 |
| ADGRE2   | rs67023356 | 19 | 14396821  | G | A | 0.2643 | 0.36  | 1E-200      | 0.009445412 | 35559 | 1452.58 |
| SIGLEC1  | rs673114   | 20 | 3697089   | T | G | 0.3518 | -0.05 | 7.76247E-11 | 0.007686238 | 35559 | 42.31   |
| PCDH10   | rs67318416 | 4  | 133586889 | T | C | 0.3331 | 0.11  | 9.33254E-38 | 0.008564521 | 35559 | 164.95  |
| EFNA3    | rs67333363 | 1  | 155085570 | G | A | 0.0869 | -0.09 | 2.51189E-10 | 0.014226435 | 35559 | 40.02   |
| CRTAM    | rs67366392 | 11 | 122872099 | C | A | 0.4362 | -0.3  | 1E-200      | 0.009174438 | 35559 | 1069.2  |
| MCEE     | rs6740268  | 2  | 71118834  | G | T | 0.175  | -0.08 | 6.45654E-16 | 0.009900525 | 35559 | 65.29   |
| FAM20B   | rs67498652 | 1  | 179026365 | T | G | 0.3794 | 0.09  | 3.46737E-26 | 0.008501941 | 35559 | 112.05  |
| CRABP2   | rs67794440 | 1  | 156708499 | C | A | 0.365  | -0.12 | 9.54993E-13 | 0.016814159 | 35559 | 50.93   |
| PTPRU    | rs67827535 | 1  | 29314670  | T | C | 0.0555 | 0.14  | 8.70964E-15 | 0.018048671 | 35559 | 60.16   |
| IL17RD   | rs6809523  | 3  | 57099110  | G | A | 0.267  | 0.24  | 2.95121E-89 | 0.011981374 | 35559 | 401.22  |
| MMP7     | rs68181448 | 11 | 102559274 | A | G | 0.2157 | -0.11 | 3.80189E-26 | 0.010399737 | 35559 | 111.87  |
| TEK      | rs682632   | 9  | 27183465  | A | C | 0.0597 | 0.39  | 1E-115      | 0.017055469 | 35559 | 522.85  |



|            |            |    |             |   |        |       |             |             |       |         |
|------------|------------|----|-------------|---|--------|-------|-------------|-------------|-------|---------|
| SPOCK3     | rs6827306  | 4  | 166728607 T | C | 0.1604 | 0.12  | 5.24807E-28 | 0.010937575 | 35559 | 120.36  |
| CRTAC1     | rs684225   | 10 | 97882605 A  | C | 0.4852 | -0.35 | 1E-200      | 0.009098612 | 35559 | 1479.66 |
| NDST1      | rs6863373  | 5  | 150530369 T | C | 0.4492 | 0.13  | 4.0738E-58  | 0.008089099 | 35559 | 258.26  |
| HAVCR2     | rs6873659  | 5  | 157102841 A | G | 0.1674 | 0.65  | 1E-200      | 0.016897422 | 35559 | 1479.66 |
| UST        | rs6920109  | 6  | 148745332 T | C | 0.2388 | 0.13  | 1.58489E-42 | 0.00951153  | 35559 | 186.79  |
| VEGFA      | rs6921438  | 6  | 43957870 A  | G | 0.4789 | -0.59 | 1E-200      | 0.01533766  | 35559 | 1479.66 |
| COL9A1     | rs6923114  | 6  | 70237113 G  | T | 0.3349 | 0.07  | 2.51189E-19 | 0.007787942 | 35559 | 80.78   |
| GNMT       | rs6940814  | 6  | 42957194 A  | G | 0.3708 | 0.22  | 1.0233E-161 | 0.008118506 | 35559 | 734.29  |
| CHST12     | rs6952433  | 7  | 2357003 A   | G | 0.2138 | 0.2   | 1.04713E-95 | 0.009635035 | 35559 | 430.85  |
| SCUBE1     | rs695786   | 22 | 43373437 C  | T | 0.4901 | 0.09  | 1.99526E-26 | 0.008460679 | 35559 | 113.15  |
| CCM2       | rs6958168  | 7  | 44980215 G  | T | 0.1718 | 0.07  | 1.04713E-11 | 0.010294313 | 35559 | 46.24   |
| CA13       | rs6987314  | 8  | 85227011 A  | G | 0.0906 | -0.58 | 1E-200      | 0.0150777   | 35559 | 1479.66 |
| MYOM2      | rs6991204  | 8  | 2107923 A   | G | 0.1649 | -0.07 | 5.88844E-10 | 0.011302375 | 35559 | 38.36   |
| ANGPT1     | rs6993770  | 8  | 105569300 T | A | 0.2245 | -0.12 | 1.31826E-32 | 0.01009167  | 35559 | 141.39  |
| LRP12      | rs6993770  | 8  | 105569300 T | A | 0.2245 | -0.06 | 5.12861E-10 | 0.00965388  | 35559 | 141.39  |
| UBXN2B     | rs7000685  | 8  | 58004774 C  | G | 0.3731 | -0.06 | 2.51189E-13 | 0.008198659 | 35559 | 53.55   |
| CLN5       | rs700363   | 13 | 77001261 A  | G | 0.0899 | -0.17 | 3.63078E-36 | 0.01353808  | 35559 | 157.67  |
| IGFBP3     | rs700750   | 7  | 46713893 C  | A | 0.3572 | -0.14 | 3.46737E-64 | 0.008276505 | 35559 | 286.11  |
| B4GALT1    | rs7019909  | 9  | 33113324 T  | C | 0.0923 | 0.3   | 5.3703E-99  | 0.014205512 | 35559 | 445.97  |
| ADAMTSL1   | rs702208   | 9  | 18639745 G  | A | 0.0468 | 0.55  | 1.4454E-173 | 0.019582592 | 35559 | 788.79  |
| ST6GALNAC6 | rs7027357  | 9  | 127897127 G | A | 0.1048 | 0.1   | 3.23594E-15 | 0.012688014 | 35559 | 62.11   |
| PTGDS      | rs7040970  | 9  | 136964561 C | T | 0.4943 | 0.14  | 7.4131E-67  | 0.008104772 | 35559 | 298.37  |
| ROR1       | rs705513   | 1  | 63669283 C  | T | 0.1733 | 0.08  | 6.30957E-14 | 0.010664546 | 35559 | 56.27   |
| CFH        | rs70620    | 1  | 196735867 A | G | 0.1819 | -0.28 | 1.0965E-156 | 0.010499336 | 35559 | 711.16  |
| ATRN       | rs709016   | 20 | 3598522 T   | C | 0.0692 | -0.46 | 2.3442E-186 | 0.01579962  | 35559 | 847.61  |
| SAA4       | rs7103794  | 11 | 18226856 A  | G | 0.4585 | 0.43  | 1E-200      | 0.011178295 | 35559 | 1479.66 |
| NTM        | rs7118465  | 11 | 132100419 C | T | 0.2916 | 0.13  | 1.58489E-47 | 0.008976941 | 35559 | 209.7   |
| CST6       | rs7128076  | 11 | 65992163 C  | T | 0.38   | -0.09 | 1.86209E-24 | 0.00881826  | 35559 | 104.16  |
| CFD        | rs71335276 | 19 | 859368 T    | G | 0.225  | -0.15 | 5.49541E-52 | 0.009887224 | 35559 | 230.15  |
| SPINT2     | rs71354995 | 19 | 38301201 G  | A | 0.2387 | -0.69 | 1E-200      | 0.017937264 | 35559 | 1479.66 |
| PPP1R14A   | rs71354995 | 19 | 38301201 G  | A | 0.2387 | -0.2  | 3.3884E-104 | 0.009226405 | 35559 | 1479.66 |
| PRSS27     | rs71386687 | 16 | 2717893 T   | G | 0.0939 | 0.31  | 8.1283E-108 | 0.014054301 | 35559 | 486.5   |
| SEMA5A     | rs71611368 | 5  | 9221592 A   | G | 0.0982 | 0.08  | 1.7378E-09  | 0.013287729 | 35559 | 36.25   |
| ISLR2      | rs7163410  | 15 | 74121570 C  | A | 0.0141 | -0.22 | 4.36516E-10 | 0.035254277 | 35559 | 38.94   |
| PRSS22     | rs7204669  | 16 | 2860735 A   | G | 0.295  | 0.24  | 7.0795E-155 | 0.009052561 | 35559 | 702.84  |

|           |            |    |           |   |   |        |       |             |             |       |         |
|-----------|------------|----|-----------|---|---|--------|-------|-------------|-------------|-------|---------|
| NDE1      | rs7206272  | 16 | 15632436  | C | A | 0.2206 | 0.08  | 1.7378E-16  | 0.009710017 | 35559 | 67.88   |
| MXRA7     | rs7219390  | 17 | 76688776  | C | T | 0.4091 | -0.28 | 1E-200      | 0.007933347 | 35559 | 1245.6  |
| LPO       | rs7219860  | 17 | 58243910  | A | G | 0.2635 | -0.29 | 1E-200      | 0.00946347  | 35559 | 939.01  |
| CCL14     | rs7222922  | 17 | 36008654  | T | C | 0.0816 | -0.86 | 1E-200      | 0.02235659  | 35559 | 1479.66 |
| DYNLL2    | rs7225351  | 17 | 58077650  | G | A | 0.3346 | -0.06 | 1.1749E-10  | 0.009313096 | 35559 | 41.5    |
| NETO1     | rs7242889  | 18 | 73564150  | G | C | 0.1801 | 0.07  | 5.62341E-11 | 0.010681446 | 35559 | 42.94   |
| SERPINB5  | rs7244879  | 18 | 63484141  | A | G | 0.3722 | -0.14 | 4.57088E-63 | 0.008351858 | 35559 | 280.97  |
| IGLON5    | rs7246422  | 19 | 51309159  | C | T | 0.4287 | 0.12  | 5.88844E-43 | 0.008733945 | 35559 | 188.76  |
| CRLF1     | rs7246833  | 19 | 18604272  | G | C | 0.2157 | 0.26  | 6.166E-164  | 0.009528587 | 35559 | 744.5   |
| HMHA1     | rs7251797  | 19 | 1077986   | G | A | 0.3543 | 0.13  | 1.12202E-51 | 0.008595511 | 35559 | 228.73  |
| PLD3      | rs7254808  | 19 | 40364607  | T | C | 0.0431 | -0.14 | 4.89779E-12 | 0.020264869 | 35559 | 47.72   |
| SERPINA11 | rs72631635 | 14 | 94455724  | T | G | 0.1619 | -0.3  | 7.4131E-158 | 0.011206976 | 35559 | 716.54  |
| SFRP1     | rs72643819 | 8  | 41309674  | T | G | 0.4181 | -0.16 | 5.88844E-77 | 0.008617209 | 35559 | 344.73  |
| HPGDS     | rs72665697 | 4  | 94346196  | G | A | 0.0343 | -0.79 | 1E-200      | 0.021782532 | 35559 | 1315.26 |
| LGMN      | rs72701845 | 14 | 92750678  | A | G | 0.0244 | 0.4   | 1.04713E-51 | 0.026439779 | 35559 | 228.87  |
| SORD      | rs72722045 | 15 | 44966007  | T | A | 0.1585 | 0.3   | 7.9433E-153 | 0.011392357 | 35559 | 693.41  |
| SYK       | rs72729008 | 9  | 90813267  | A | G | 0.1433 | -0.12 | 7.94328E-26 | 0.011419966 | 35559 | 110.41  |
| CNTFR     | rs72737103 | 9  | 34576584  | C | T | 0.0655 | -0.23 | 3.89045E-43 | 0.016703618 | 35559 | 189.59  |
| TNC       | rs72757370 | 9  | 115538859 | G | A | 0.0521 | 0.11  | 8.31764E-12 | 0.016098425 | 35559 | 46.69   |
| FAIM3     | rs72758947 | 1  | 206913708 | G | A | 0.1613 | -0.16 | 6.0256E-43  | 0.011646673 | 35559 | 188.72  |
| TPSB2     | rs72775459 | 16 | 1225494   | T | C | 0.0423 | 0.69  | 1E-200      | 0.017937264 | 35559 | 1479.66 |
| GM2A      | rs72794132 | 5  | 151239432 | T | C | 0.1638 | 0.32  | 3.4674E-184 | 0.011056328 | 35559 | 837.63  |
| CRISPLD2  | rs72799568 | 16 | 84868877  | T | A | 0.0594 | -0.33 | 1.1749E-77  | 0.017690712 | 35559 | 347.95  |
| LMAN2L    | rs72809827 | 2  | 96725216  | T | C | 0.3277 | 0.12  | 2.63027E-49 | 0.008129764 | 35559 | 217.86  |
| NTN1      | rs72809986 | 17 | 9080705   | A | G | 0.1618 | -0.47 | 1E-200      | 0.012218136 | 35559 | 1479.66 |
| PLCG2     | rs72824905 | 16 | 81908423  | G | C | 0.0183 | 0.31  | 1.69824E-24 | 0.030347435 | 35559 | 104.34  |
| GP1BA     | rs72835078 | 17 | 4923297   | T | G | 0.0817 | 0.25  | 2.04174E-64 | 0.014752288 | 35559 | 287.17  |
| CD300C    | rs72844326 | 17 | 74462952  | G | T | 0.0422 | -0.61 | 1.4454E-200 | 0.020187759 | 35559 | 912.98  |
| AFM       | rs72858937 | 4  | 73539253  | T | C | 0.0139 | -0.76 | 1.28825E-98 | 0.036057948 | 35559 | 444.22  |
| REG3A     | rs72913282 | 2  | 79146533  | T | C | 0.0884 | 0.29  | 3.31131E-83 | 0.015006486 | 35559 | 373.43  |
| COL3A1    | rs72914144 | 2  | 189377017 | T | C | 0.183  | 0.08  | 1.1749E-12  | 0.011254465 | 35559 | 50.52   |
| EIF1AD    | rs72930984 | 11 | 66011451  | T | C | 0.0212 | 0.63  | 3.0903E-118 | 0.027252126 | 35559 | 534.39  |
| MGP       | rs7294636  | 12 | 14901082  | A | G | 0.3741 | -0.25 | 1.5849E-193 | 0.008424424 | 35559 | 880.59  |
| MMP19     | rs7296597  | 12 | 55848171  | A | G | 0.0471 | -0.22 | 4.46684E-29 | 0.019657048 | 35559 | 125.25  |
| DARS      | rs72970243 | 2  | 135726662 | A | G | 0.0865 | 0.11  | 7.94328E-14 | 0.014723093 | 35559 | 55.82   |

|          |            |    |           |   |   |        |       |             |             |       |         |
|----------|------------|----|-----------|---|---|--------|-------|-------------|-------------|-------|---------|
| GFRAL    | rs72988065 | 6  | 55619783  | G | A | 0.1893 | 0.17  | 1.14815E-60 | 0.010346318 | 35559 | 269.96  |
| TMEM132D | rs7299188  | 12 | 129289849 | G | C | 0.3716 | 0.08  | 1.51356E-19 | 0.008845866 | 35559 | 81.79   |
| CHGA     | rs729940   | 14 | 92932756  | T | C | 0.1417 | -0.34 | 1.6218E-184 | 0.01173672  | 35559 | 839.15  |
| MAN1A2   | rs73013841 | 1  | 117312289 | T | C | 0.112  | -0.3  | 7.7625E-110 | 0.013473001 | 35559 | 495.78  |
| PGLS     | rs73020480 | 19 | 17518363  | A | G | 0.2261 | 0.12  | 3.71535E-35 | 0.0096995   | 35559 | 153.05  |
| S100A6   | rs73026350 | 1  | 153547505 | G | C | 0.0446 | 0.2   | 3.16228E-24 | 0.019695582 | 35559 | 103.11  |
| FRZB     | rs73037291 | 2  | 182847155 | C | T | 0.0434 | -0.38 | 7.76247E-56 | 0.024138851 | 35559 | 247.8   |
| CLEC11A  | rs73044692 | 19 | 50752798  | T | G | 0.0842 | -0.09 | 1.58489E-09 | 0.014911818 | 35559 | 36.42   |
| SIGLEC5  | rs73050865 | 19 | 51612691  | G | C | 0.0239 | -1.18 | 1E-200      | 0.030675321 | 35559 | 1479.66 |
| SIGLEC14 | rs73050865 | 19 | 51612691  | G | C | 0.0239 | -1.29 | 1E-200      | 0.033534884 | 35559 | 1479.66 |
| IDH1     | rs73070958 | 2  | 208251325 | T | C | 0.0598 | -0.36 | 1.7378E-103 | 0.016665489 | 35559 | 466.6   |
| CACNA2D3 | rs73082000 | 3  | 54099523  | A | G | 0.1461 | 0.23  | 2.88403E-80 | 0.01212287  | 35559 | 359.93  |
| TAC1     | rs731290   | 7  | 97654525  | G | C | 0.16   | 0.12  | 4.7863E-25  | 0.011608632 | 35559 | 106.85  |
| SEZ6L    | rs73158619 | 22 | 26302786  | A | G | 0.038  | 0.22  | 7.94328E-26 | 0.020936605 | 35559 | 110.41  |
| PIP      | rs73170678 | 7  | 143139110 | T | A | 0.1375 | 0.6   | 1E-200      | 0.015597621 | 35559 | 1479.66 |
| KL       | rs73176836 | 13 | 33041401  | C | T | 0.1792 | 0.16  | 1.04713E-45 | 0.011275045 | 35559 | 201.36  |
| SELPLG   | rs73191242 | 12 | 108620180 | A | G | 0.2105 | -0.28 | 3.2359E-167 | 0.010159156 | 35559 | 759.59  |
| BST1     | rs73224659 | 4  | 15712566  | A | C | 0.1537 | -1.4  | 1E-200      | 0.036394448 | 35559 | 1479.66 |
| CLSTN2   | rs73224907 | 3  | 139862246 | C | A | 0.0557 | 0.22  | 6.76083E-33 | 0.018415229 | 35559 | 142.71  |
| TIGIT    | rs73238029 | 3  | 114295233 | C | A | 0.2442 | 0.08  | 6.60693E-20 | 0.008758572 | 35559 | 83.42   |
| PDGFRA   | rs73252950 | 4  | 54275333  | T | C | 0.0779 | -0.15 | 1.14815E-24 | 0.014629971 | 35559 | 105.12  |
| TNFRSF19 | rs7329483  | 13 | 23668662  | A | G | 0.1037 | -0.09 | 3.31131E-12 | 0.012923912 | 35559 | 48.49   |
| B4GALT7  | rs73337767 | 5  | 177601825 | T | C | 0.0306 | 0.17  | 2.0893E-12  | 0.024187615 | 35559 | 49.4    |
| NQO2     | rs73349551 | 6  | 3011537   | T | G | 0.0086 | -1.02 | 1.4454E-145 | 0.039701464 | 35559 | 660.03  |
| F10      | rs7335409  | 13 | 113155872 | T | C | 0.1505 | -0.15 | 2.69153E-39 | 0.011437033 | 35559 | 172     |
| GSS      | rs734111   | 20 | 34945933  | A | C | 0.4135 | -0.22 | 7.58578E-16 | 0.027292909 | 35559 | 64.97   |
| CBLN4    | rs7351418  | 20 | 55721241  | T | C | 0.3446 | 0.15  | 5.24807E-70 | 0.008480634 | 35559 | 312.82  |
| CBL      | rs73564493 | 11 | 119185564 | A | G | 0.0507 | -0.2  | 3.89045E-28 | 0.018184491 | 35559 | 120.96  |
| ANXA1    | rs7357731  | 9  | 73175019  | G | A | 0.026  | 0.34  | 2.34423E-40 | 0.025565733 | 35559 | 176.85  |
| APLP2    | rs73583419 | 11 | 130069495 | A | C | 0.0631 | 0.28  | 2.63027E-63 | 0.016671076 | 35559 | 282.07  |
| SIGLEC14 | rs7359936  | 19 | 51647348  | A | C | 0.4654 | 0.08  | 2.5704E-23  | 0.008041735 | 35559 | 92.58   |
| SIGLEC5  | rs7359936  | 19 | 51647348  | A | C | 0.4654 | 0.08  | 6.45654E-22 | 0.008314283 | 35559 | 92.58   |
| SCARF2   | rs738087   | 22 | 20421260  | A | G | 0.2165 | -0.16 | 5.12861E-56 | 0.010146838 | 35559 | 248.63  |
| PCOLCE   | rs7385804  | 7  | 100638347 | C | A | 0.3515 | -0.16 | 1.1749E-78  | 0.008521271 | 35559 | 352.54  |
| SUMO3    | rs741949   | 21 | 44836982  | G | T | 0.248  | 0.06  | 3.23594E-12 | 0.008611933 | 35559 | 48.54   |

|         |            |    |           |   |   |        |       |             |             |       |         |
|---------|------------|----|-----------|---|---|--------|-------|-------------|-------------|-------|---------|
| GGH     | rs74329104 | 8  | 63018637  | A | G | 0.0747 | 0.63  | 1E-200      | 0.016377502 | 35559 | 1479.66 |
| SCO2    | rs74479613 | 22 | 50525476  | T | C | 0.0887 | -0.16 | 8.70964E-31 | 0.013869893 | 35559 | 133.07  |
| C7      | rs74480769 | 5  | 40972109  | G | A | 0.0219 | -1.28 | 1E-200      | 0.033274924 | 35559 | 1479.66 |
| NT5DC3  | rs74517500 | 12 | 103779853 | C | T | 0.0104 | 0.58  | 2.34423E-53 | 0.037719284 | 35559 | 236.43  |
| FOLR2   | rs74603010 | 11 | 72215198  | G | A | 0.0211 | 0.25  | 2.75423E-19 | 0.027845461 | 35559 | 80.6    |
| RECQL   | rs74626198 | 12 | 21543317  | C | T | 0.0447 | -0.21 | 4.16869E-29 | 0.018753287 | 35559 | 125.39  |
| LDHB    | rs74626198 | 12 | 21543317  | C | T | 0.0447 | -0.18 | 1.77828E-20 | 0.01940727  | 35559 | 125.39  |
| NPL     | rs74646646 | 1  | 182909529 | C | T | 0.0233 | 0.44  | 2.75423E-60 | 0.026865596 | 35559 | 268.22  |
| KLK8    | rs74705037 | 19 | 51001552  | A | G | 0.0271 | 0.86  | 1E-200      | 0.025406724 | 35559 | 1145.71 |
| AP2A2   | rs7482118  | 11 | 972603    | A | G | 0.3424 | 0.06  | 1.02329E-13 | 0.008066836 | 35559 | 55.32   |
| PIGR    | rs748844   | 1  | 206936501 | A | G | 0.3979 | -0.14 | 2.18776E-64 | 0.008263262 | 35559 | 287.03  |
| CCL25   | rs74959615 | 19 | 8056212   | A | G | 0.0839 | -1.12 | 1E-200      | 0.029115559 | 35559 | 1479.66 |
| RFESD   | rs75044039 | 5  | 95628553  | C | G | 0.0369 | -0.16 | 4.36516E-14 | 0.021193108 | 35559 | 56.99   |
| CNDP1   | rs7505555  | 18 | 74576370  | A | G | 0.1774 | 0.12  | 2.63027E-30 | 0.010489251 | 35559 | 130.87  |
| LYPLAL1 | rs75060212 | 1  | 219172269 | G | T | 0.1337 | 0.15  | 1.41254E-36 | 0.011874917 | 35559 | 159.55  |
| SARS2   | rs7508539  | 19 | 38926800  | G | A | 0.3599 | 0.11  | 1.34896E-40 | 0.008245685 | 35559 | 177.95  |
| CREG1   | rs7513428  | 1  | 167546035 | T | C | 0.1535 | 0.22  | 2.23872E-82 | 0.011442782 | 35559 | 369.62  |
| MGAT2   | rs7519     | 14 | 49621035  | T | C | 0.4515 | -0.13 | 1.25893E-59 | 0.00798275  | 35559 | 265.19  |
| ASF1A   | rs75259763 | 6  | 119019145 | T | C | 0.0164 | 0.22  | 1.09648E-11 | 0.032385168 | 35559 | 46.15   |
| CSRP1   | rs7527761  | 1  | 201491124 | C | T | 0.3174 | -0.1  | 1.14815E-27 | 0.009174018 | 35559 | 118.81  |
| S100A2  | rs75282796 | 1  | 153561364 | C | T | 0.0111 | -0.41 | 3.01995E-27 | 0.03792081  | 35559 | 116.89  |
| HDHD2   | rs75284103 | 18 | 47137207  | A | G | 0.0459 | -0.22 | 5.88844E-31 | 0.019015658 | 35559 | 133.84  |
| PLCG1   | rs753381   | 20 | 41168825  | T | C | 0.4731 | -0.07 | 5.7544E-17  | 0.00836305  | 35559 | 70.06   |
| GGPS1   | rs7534175  | 1  | 235346698 | G | A | 0.1343 | 0.13  | 2.81838E-28 | 0.011788797 | 35559 | 121.6   |
| LDLRAP1 | rs75446219 | 1  | 25551001  | T | C | 0.0321 | 0.27  | 4.7863E-29  | 0.02413777  | 35559 | 125.11  |
| FAM151A | rs7545297  | 1  | 54631647  | A | G | 0.3261 | 0.32  | 1E-200      | 0.009164706 | 35559 | 1219.1  |
| FIS1    | rs75487681 | 7  | 101253420 | T | A | 0.059  | -0.32 | 4.57088E-81 | 0.016781176 | 35559 | 363.61  |
| TIE1    | rs7549876  | 1  | 43294565  | T | G | 0.3998 | -0.18 | 1.6596E-114 | 0.007914307 | 35559 | 517.24  |
| SYK     | rs75505307 | 9  | 90819332  | T | C | 0.1328 | -0.13 | 8.70964E-27 | 0.012133175 | 35559 | 114.79  |
| ACP6    | rs75583687 | 1  | 147656613 | C | T | 0.0287 | -1.79 | 1E-200      | 0.046532902 | 35559 | 1479.66 |
| AKR1B1  | rs75627053 | 7  | 134468104 | T | C | 0.012  | 0.3   | 8.31764E-16 | 0.037269692 | 35559 | 64.79   |
| HMOX1   | rs75689278 | 22 | 35376664  | G | A | 0.0375 | -0.14 | 4.57088E-10 | 0.02246048  | 35559 | 38.85   |
| UGT1A6  | rs7572563  | 2  | 233708590 | A | G | 0.4727 | 0.1   | 1.69824E-13 | 0.013567362 | 35559 | 54.32   |
| RTN4R   | rs75765    | 22 | 20187436  | C | T | 0.2699 | 0.29  | 1E-200      | 0.009512762 | 35559 | 929.31  |
| CNRIP1  | rs7578047  | 2  | 68352799  | G | A | 0.1364 | -0.66 | 1E-200      | 0.017157383 | 35559 | 1479.66 |

|           |            |    |           |   |   |        |       |             |             |       |         |
|-----------|------------|----|-----------|---|---|--------|-------|-------------|-------------|-------|---------|
| LILRA3    | rs75814910 | 19 | 54301205  | A | C | 0.0526 | 0.14  | 1.86209E-13 | 0.019026026 | 35559 | 54.14   |
| IL1R1     | rs7588201  | 2  | 102129816 | C | A | 0.2798 | -0.19 | 3.01995E-97 | 0.00907904  | 35559 | 437.93  |
| RSPO4     | rs75904281 | 20 | 963194    | T | C | 0.0141 | -0.39 | 1.44544E-29 | 0.034539247 | 35559 | 127.49  |
| IGFBP5    | rs7598172  | 2  | 216813276 | G | T | 0.499  | 0.05  | 2.51189E-10 | 0.007903575 | 35559 | 40.02   |
| ADAM23    | rs7598482  | 2  | 206475415 | T | C | 0.3423 | -0.25 | 1E-200      | 0.00819579  | 35559 | 930.41  |
| POFUT1    | rs76143353 | 20 | 32227952  | T | C | 0.0469 | -0.64 | 1E-200      | 0.018255494 | 35559 | 1228.99 |
| NOG       | rs76164057 | 17 | 56763503  | G | A | 0.0141 | 1.26  | 1E-200      | 0.035435973 | 35559 | 1264.24 |
| CD200     | rs7619941  | 3  | 112337567 | A | G | 0.0677 | -0.13 | 5.12861E-16 | 0.016032735 | 35559 | 65.74   |
| LYVE1     | rs76318574 | 11 | 10506171  | C | T | 0.0243 | 0.34  | 6.0256E-36  | 0.027163017 | 35559 | 156.67  |
| PROK2     | rs7634474  | 3  | 71780316  | A | G | 0.1994 | 0.66  | 1E-200      | 0.017157383 | 35559 | 1479.66 |
| NIT2      | rs7649598  | 3  | 100334239 | A | G | 0.2832 | -0.08 | 5.01187E-21 | 0.008502556 | 35559 | 88.52   |
| SERPINA12 | rs76624128 | 14 | 94517387  | G | A | 0.0625 | 0.57  | 1E-200      | 0.017084303 | 35559 | 1113.09 |
| ANTXR2    | rs7674623  | 4  | 79873527  | T | C | 0.2132 | 0.22  | 1.3183E-100 | 0.010332036 | 35559 | 453.37  |
| METAP1    | rs7676259  | 4  | 99021498  | A | G | 0.387  | 0.06  | 4.16869E-15 | 0.007643556 | 35559 | 61.62   |
| SPARCL1   | rs7681694  | 4  | 87541577  | A | G | 0.3902 | 0.55  | 1E-200      | 0.014297819 | 35559 | 1479.66 |
| REG1A     | rs76841471 | 2  | 79103043  | G | T | 0.0685 | 0.53  | 1E-200      | 0.016475473 | 35559 | 1034.79 |
| REG1B     | rs76841471 | 2  | 79103043  | G | T | 0.0685 | 0.53  | 1E-200      | 0.016388634 | 35559 | 1034.79 |
| CPLX1     | rs7687101  | 4  | 818891    | T | G | 0.433  | 0.06  | 1.34896E-12 | 0.008463587 | 35559 | 50.25   |
| CAT       | rs769218   | 11 | 34449132  | A | G | 0.2199 | -0.21 | 3.02E-107   | 0.00954639  | 35559 | 483.88  |
| SEMA4A    | rs7695     | 1  | 156177535 | C | T | 0.3764 | 0.17  | 8.31764E-82 | 0.008873628 | 35559 | 367     |
| SH3BP2    | rs7695151  | 4  | 2770803   | T | C | 0.4419 | 0.26  | 1E-200      | 0.008029294 | 35559 | 1048.5  |
| VWC2      | rs769604   | 7  | 49775794  | G | C | 0.4674 | -0.16 | 1.99526E-65 | 0.009366179 | 35559 | 291.8   |
| SERPINB13 | rs77157727 | 18 | 63586727  | A | G | 0.043  | -0.44 | 3.6308E-110 | 0.019730247 | 35559 | 497.3   |
| SPINK1    | rs7725017  | 5  | 147838260 | C | A | 0.3905 | 0.11  | 1.86209E-45 | 0.007773738 | 35559 | 200.22  |
| IL6ST     | rs7730934  | 5  | 55970684  | A | G | 0.1236 | 0.37  | 1.3804E-188 | 0.012632189 | 35559 | 857.87  |
| ITIH4     | rs77347777 | 3  | 52814191  | T | C | 0.0872 | -0.21 | 6.91831E-45 | 0.014938528 | 35559 | 197.61  |
| XRCC4     | rs7736592  | 5  | 83348245  | A | G | 0.1198 | 0.15  | 2.95121E-36 | 0.011929794 | 35559 | 158.09  |
| IL5RA     | rs77400868 | 3  | 3109280   | G | A | 0.1532 | 0.55  | 1E-200      | 0.014297819 | 35559 | 1479.66 |
| SNX1      | rs77404765 | 15 | 64300071  | C | T | 0.0193 | 0.44  | 2.34423E-49 | 0.029793468 | 35559 | 218.09  |
| IL22RA2   | rs7749390  | 6  | 137219233 | G | A | 0.3517 | 0.11  | 1.77828E-38 | 0.008480216 | 35559 | 168.25  |
| SRI       | rs77500696 | 7  | 88311266  | A | T | 0.195  | 0.14  | 6.60693E-40 | 0.010588936 | 35559 | 174.79  |
| TFF2      | rs77505241 | 21 | 42349233  | C | T | 0.1865 | -0.11 | 2.51189E-26 | 0.010361753 | 35559 | 112.69  |
| LUM       | rs77751442 | 12 | 91091238  | T | G | 0.0189 | -0.38 | 6.45654E-38 | 0.02952106  | 35559 | 165.68  |
| LILRA3    | rs77777983 | 19 | 54226365  | G | C | 0.1775 | -0.16 | 1.38038E-47 | 0.011041306 | 35559 | 209.98  |
| CCDC126   | rs7781145  | 7  | 23586983  | A | C | 0.256  | 0.31  | 1E-200      | 0.009478621 | 35559 | 1069.57 |

|          |            |    |             |   |        |       |             |             |       |         |
|----------|------------|----|-------------|---|--------|-------|-------------|-------------|-------|---------|
| ELMO1    | rs7782999  | 7  | 37407090 T  | A | 0.1828 | -0.1  | 3.71535E-25 | 0.009651218 | 35559 | 107.35  |
| BMPER    | rs77897447 | 7  | 33742313 G  | C | 0.1474 | 0.14  | 1.65959E-32 | 0.011792701 | 35559 | 140.93  |
| ITIH2    | rs77938199 | 10 | 7700504 G   | A | 0.0659 | 1.01  | 1E-200      | 0.026255995 | 35559 | 1479.66 |
| ETFA     | rs78185702 | 15 | 76317894 T  | C | 0.1124 | 0.09  | 7.4131E-12  | 0.013139728 | 35559 | 46.91   |
| RMDN1    | rs7820697  | 8  | 86490626 A  | C | 0.4432 | 0.15  | 5.01187E-42 | 0.011042748 | 35559 | 184.5   |
| CDH17    | rs7833351  | 8  | 94169950 G  | A | 0.3118 | 0.27  | 1E-200      | 0.008684528 | 35559 | 966.52  |
| DEFA5    | rs7839771  | 8  | 7055504 T   | C | 0.0177 | -0.3  | 1.28825E-20 | 0.03222626  | 35559 | 86.66   |
| PDCD1LG2 | rs7854413  | 9  | 5557708 C   | T | 0.0721 | -0.22 | 5.49541E-48 | 0.01511595  | 35559 | 211.81  |
| MATN2    | rs78548919 | 8  | 98052647 T  | C | 0.1966 | 0.14  | 4.36516E-40 | 0.010564058 | 35559 | 175.62  |
| NANS     | rs7855984  | 9  | 98056008 A  | G | 0.2473 | 0.09  | 3.46737E-22 | 0.009292024 | 35559 | 93.81   |
| GZMB     | rs78564162 | 14 | 24689939 G  | A | 0.0655 | 0.16  | 2.29087E-23 | 0.016064975 | 35559 | 99.19   |
| C8G      | rs7862602  | 9  | 136946019 G | T | 0.4365 | 0.46  | 1E-200      | 0.011958176 | 35559 | 1479.66 |
| SLITRK3  | rs78729408 | 3  | 165436289 A | T | 0.0069 | 0.32  | 1.86209E-10 | 0.050217312 | 35559 | 40.6    |
| SIAE     | rs78778622 | 11 | 124660768 C | T | 0.0879 | -0.2  | 1.23027E-44 | 0.014268585 | 35559 | 196.46  |
| C1QC     | rs78865058 | 1  | 22617716 A  | G | 0.0434 | 1.03  | 1E-200      | 0.026775915 | 35559 | 1479.66 |
| CELA2A   | rs78880003 | 1  | 15414434 T  | C | 0.0611 | -0.2  | 5.62341E-31 | 0.017281061 | 35559 | 133.94  |
| TCL1A    | rs78986913 | 14 | 95696081 A  | G | 0.0414 | -0.45 | 3.3113E-107 | 0.020460437 | 35559 | 483.69  |
| SEMA7A   | rs78994380 | 15 | 74400071 A  | C | 0.1125 | -0.13 | 9.77237E-23 | 0.013245992 | 35559 | 96.31   |
| VWA2     | rs79009215 | 10 | 114286037 A | G | 0.0102 | -0.52 | 6.16595E-39 | 0.039839729 | 35559 | 170.35  |
| LILRB3   | rs79016353 | 19 | 54247294 A  | G | 0.0634 | 0.24  | 1.7378E-50  | 0.016061351 | 35559 | 223.27  |
| PNLIPRP2 | rs7910135  | 10 | 116638535 C | A | 0.4726 | -1.01 | 1E-200      | 0.026255995 | 35559 | 1479.66 |
| FAS      | rs7911226  | 10 | 89009208 G  | A | 0.2845 | -0.25 | 2.4547E-167 | 0.009067382 | 35559 | 692.86  |
| ACADSB   | rs7913063  | 10 | 123039167 T | A | 0.0932 | 0.17  | 4.2658E-36  | 0.013551853 | 35559 | 157.35  |
| CXCL12   | rs7918194  | 10 | 44606972 T  | C | 0.4577 | -0.06 | 1.02329E-11 | 0.008819395 | 35559 | 46.28   |
| SBDS     | rs79344818 | 7  | 66988489 G  | A | 0.0338 | -0.32 | 1.25893E-43 | 0.023103444 | 35559 | 191.83  |
| LILRA2   | rs79346487 | 19 | 54572919 A  | G | 0.0216 | 0.18  | 3.0903E-12  | 0.025811797 | 35559 | 48.63   |
| CHRDL2   | rs7935154  | 11 | 74710367 C  | T | 0.2234 | 0.09  | 1.77828E-20 | 0.009703635 | 35559 | 86.02   |
| GIF      | rs7938323  | 11 | 61202327 G  | A | 0.3878 | -0.19 | 5.2481E-117 | 0.008262718 | 35559 | 528.73  |
| NTF3     | rs79426122 | 12 | 5574094 T   | C | 0.0662 | 0.14  | 1.8197E-18  | 0.015967269 | 35559 | 76.87   |
| CLMP     | rs7946718  | 11 | 123197533 A | G | 0.4079 | -0.21 | 3.0903E-142 | 0.008270319 | 35559 | 644.72  |
| PDGFD    | rs7950273  | 11 | 104160870 G | C | 0.3013 | -0.35 | 1E-200      | 0.009098612 | 35559 | 1479.66 |
| AMIGO2   | rs79609374 | 12 | 47079943 G  | A | 0.2848 | -0.11 | 3.23594E-31 | 0.009465892 | 35559 | 135.03  |
| VIM      | rs796667   | 10 | 16904820 G  | T | 0.4296 | 0.08  | 3.01995E-21 | 0.008454837 | 35559 | 89.53   |
| ACP1     | rs79716074 | 2  | 277003 G    | A | 0.3648 | 1.09  | 1E-200      | 0.028335678 | 35559 | 1479.66 |
| PLXNC1   | rs7972001  | 12 | 94229726 T  | C | 0.0317 | -0.57 | 5.7544E-128 | 0.02368542  | 35559 | 579.11  |

|          |            |    |           |   |   |        |       |             |             |       |         |
|----------|------------|----|-----------|---|---|--------|-------|-------------|-------------|-------|---------|
| TMEM132C | rs7973997  | 12 | 128272393 | T | C | 0.3279 | -0.24 | 1.7378E-159 | 0.008919052 | 35559 | 724.04  |
| GSTZ1    | rs7975     | 14 | 77326864  | A | G | 0.3128 | 1.15  | 1E-200      | 0.02989544  | 35559 | 1479.66 |
| LHB      | rs79785970 | 19 | 49014074  | G | C | 0.1274 | -0.44 | 1E-200      | 0.011778045 | 35559 | 1395.51 |
| LCP1     | rs7990889  | 13 | 46117262  | G | C | 0.2809 | -0.13 | 1.1749E-45  | 0.00916619  | 35559 | 201.13  |
| TNFSF12  | rs80067372 | 17 | 7549435   | A | G | 0.3055 | 0.37  | 1E-200      | 0.009618533 | 35559 | 1479.66 |
| FAM177A1 | rs8006935  | 14 | 35064744  | G | A | 0.3201 | 0.08  | 4.89779E-16 | 0.009859495 | 35559 | 65.83   |
| B3GNT2   | rs80161321 | 2  | 62186659  | T | C | 0.0111 | -0.24 | 5.24807E-10 | 0.038638002 | 35559 | 38.58   |
| ANXA2    | rs8023979  | 15 | 60391750  | G | A | 0.1418 | -0.08 | 1.58489E-09 | 0.013254949 | 35559 | 36.42   |
| ANXA2    | rs8033800  | 15 | 60396980  | T | A | 0.366  | 0.56  | 1E-200      | 0.014557779 | 35559 | 1479.66 |
| IGDCC4   | rs8034057  | 15 | 65497092  | A | G | 0.0987 | -0.32 | 1.6596E-122 | 0.013594943 | 35559 | 554.01  |
| RGMA     | rs8035249  | 15 | 93486779  | T | C | 0.2778 | 0.08  | 5.62341E-19 | 0.008989539 | 35559 | 79.19   |
| CTRB2    | rs8048956  | 16 | 75221068  | G | C | 0.1972 | 0.86  | 1E-200      | 0.02235659  | 35559 | 1479.66 |
| CTRB1    | rs8051363  | 16 | 75221319  | A | G | 0.261  | -0.41 | 1E-200      | 0.010658374 | 35559 | 1479.66 |
| CRISPLD2 | rs8057431  | 16 | 84806348  | C | A | 0.3366 | -0.23 | 4.8978E-147 | 0.008906802 | 35559 | 666.79  |
| DPEP2    | rs8059305  | 16 | 68002763  | C | A | 0.1141 | 0.21  | 2.39883E-60 | 0.012815642 | 35559 | 268.49  |
| KCNAB2   | rs806109   | 1  | 5992521   | G | A | 0.2151 | -0.08 | 6.60693E-17 | 0.009576415 | 35559 | 69.78   |
| COL1A1   | rs8066653  | 17 | 50237339  | T | A | 0.2584 | -0.06 | 1.44544E-12 | 0.008475024 | 35559 | 50.12   |
| SPATA20  | rs8076632  | 17 | 50548567  | G | C | 0.4082 | -0.32 | 1E-200      | 0.008318731 | 35559 | 1479.66 |
| GLTPD2   | rs8078118  | 17 | 4786743   | A | C | 0.3558 | 0.19  | 2.0417E-109 | 0.00854956  | 35559 | 493.85  |
| CST4     | rs8121100  | 20 | 23695261  | G | A | 0.0934 | -0.43 | 1E-200      | 0.013761336 | 35559 | 976.32  |
| RTN4R    | rs8142885  | 22 | 20223616  | C | T | 0.1564 | -0.19 | 2.34423E-52 | 0.012477912 | 35559 | 231.85  |
| NELL1    | rs8176786  | 11 | 20937848  | T | C | 0.063  | 1.06  | 1E-200      | 0.027555796 | 35559 | 1479.66 |
| TF       | rs8177245  | 3  | 133760386 | G | A | 0.2701 | 0.14  | 4.89779E-63 | 0.008353905 | 35559 | 280.84  |
| IL15RA   | rs8177683  | 10 | 5966995   | T | C | 0.3861 | 0.4   | 1E-200      | 0.010398414 | 35559 | 1479.66 |
| AIF1L    | rs818058   | 9  | 131090414 | G | C | 0.4411 | -0.24 | 5.88844E-51 | 0.015984404 | 35559 | 225.43  |
| MAX      | rs8181938  | 14 | 65088994  | G | A | 0.3942 | -0.18 | 1.4125E-106 | 0.008208778 | 35559 | 480.8   |
| DDOST    | rs818194   | 1  | 20605335  | A | T | 0.2268 | -0.06 | 3.98107E-11 | 0.009084329 | 35559 | 43.62   |
| GXYLT1   | rs824700   | 12 | 42056895  | A | G | 0.4143 | -0.1  | 8.91251E-34 | 0.008254963 | 35559 | 146.74  |
| CD59     | rs831630   | 11 | 33721473  | T | C | 0.3266 | -0.18 | 5.1286E-101 | 0.008435975 | 35559 | 455.25  |
| C9       | rs835222   | 5  | 39362065  | A | G | 0.3975 | -0.06 | 1.02329E-10 | 0.00928294  | 35559 | 41.77   |
| C1QTNF3  | rs840390   | 5  | 34018518  | A | G | 0.1311 | -0.18 | 4.46684E-54 | 0.011625093 | 35559 | 239.73  |
| HS6ST1   | rs840870   | 2  | 128308686 | G | T | 0.4317 | 0.15  | 1.94984E-78 | 0.008000163 | 35559 | 351.53  |
| STAT6    | rs841718   | 12 | 57099213  | G | A | 0.3363 | -0.09 | 2.39883E-25 | 0.00865123  | 35559 | 108.22  |
| IFI16    | rs856053   | 1  | 159031714 | G | A | 0.1675 | -0.07 | 3.0903E-10  | 0.011121386 | 35559 | 39.61   |
| SHBG     | rs858519   | 17 | 7628647   | T | C | 0.47   | -0.17 | 9.54993E-95 | 0.008232023 | 35559 | 426.44  |

|         |           |    |           |   |   |        |       |             |             |       |         |
|---------|-----------|----|-----------|---|---|--------|-------|-------------|-------------|-------|---------|
| SAR1A   | rs870801  | 10 | 70169990  | A | C | 0.3952 | 0.15  | 5.62341E-73 | 0.008301654 | 35559 | 326.46  |
| PF4V1   | rs872914  | 4  | 73852384  | G | A | 0.2893 | 0.32  | 1E-200      | 0.008669527 | 35559 | 1362.34 |
| OXT     | rs877172  | 20 | 3069244   | G | T | 0.3317 | 0.36  | 1E-200      | 0.009358572 | 35559 | 1479.66 |
| RARRES2 | rs883138  | 7  | 150345704 | C | A | 0.2606 | 0.25  | 1.9055E-159 | 0.009291859 | 35559 | 723.85  |
| LGALS4  | rs883394  | 19 | 38714973  | T | C | 0.4753 | -0.05 | 3.98107E-11 | 0.007570274 | 35559 | 43.62   |
| PYGL    | rs883699  | 14 | 50936043  | T | C | 0.3851 | -0.1  | 6.16595E-36 | 0.00799029  | 35559 | 156.62  |
| CNTN5   | rs888598  | 11 | 99992101  | T | A | 0.4556 | -0.09 | 6.60693E-26 | 0.008550847 | 35559 | 110.78  |
| GP6     | rs892090  | 19 | 55027704  | T | G | 0.1645 | -0.38 | 1E-200      | 0.011049914 | 35559 | 1182.56 |
| TBCE    | rs903347  | 1  | 235423298 | C | T | 0.3866 | 0.1   | 1.8197E-33  | 0.008295138 | 35559 | 145.32  |
| SEMA3C  | rs917191  | 7  | 80941555  | G | C | 0.4163 | -0.11 | 1.14815E-38 | 0.008458379 | 35559 | 169.12  |
| DUT     | rs919129  | 15 | 48383030  | G | A | 0.138  | -0.08 | 1.12202E-12 | 0.011244413 | 35559 | 50.62   |
| ZADH2   | rs9240    | 18 | 75198732  | C | T | 0.428  | -0.09 | 1.20226E-31 | 0.007689053 | 35559 | 137     |
| OGN     | rs9299404 | 9  | 92408056  | A | G | 0.4126 | 0.39  | 1E-200      | 0.010138453 | 35559 | 1479.66 |
| DSG2    | rs9304098 | 18 | 31503667  | T | G | 0.4542 | -0.19 | 1.5849E-119 | 0.008173674 | 35559 | 540.32  |
| PRSS57  | rs9304936 | 19 | 689590    | C | G | 0.3082 | -0.49 | 1E-200      | 0.012738057 | 35559 | 1479.66 |
| PROS1   | rs930814  | 3  | 94256084  | C | G | 0.0312 | -0.19 | 2.69153E-15 | 0.024037141 | 35559 | 62.48   |
| NPDC1   | rs9314872 | 9  | 137059328 | G | C | 0.1009 | -0.09 | 1.58489E-11 | 0.013353302 | 35559 | 45.42   |
| MDGA1   | rs9349050 | 6  | 37695848  | T | C | 0.4736 | 1.06  | 1E-200      | 0.027555796 | 35559 | 1479.66 |
| DLL1    | rs9356631 | 6  | 170278382 | G | A | 0.417  | 0.1   | 7.94328E-32 | 0.008517846 | 35559 | 137.82  |
| ULK3    | rs936228  | 15 | 74839823  | T | C | 0.2566 | 0.09  | 5.62341E-22 | 0.009339787 | 35559 | 92.85   |
| RTN4IP1 | rs9373885 | 6  | 106635743 | T | C | 0.2721 | -0.07 | 4.36516E-16 | 0.00861223  | 35559 | 66.06   |
| PLA2G7  | rs9381472 | 6  | 46691168  | G | C | 0.3291 | 0.11  | 4.67735E-36 | 0.008773951 | 35559 | 157.17  |
| CRISP2  | rs9381797 | 6  | 49556733  | T | C | 0.4571 | -0.08 | 8.31764E-21 | 0.008551086 | 35559 | 87.52   |
| IFNGR1  | rs9389484 | 6  | 137208790 | T | C | 0.239  | -0.08 | 1.07152E-15 | 0.009977082 | 35559 | 64.29   |
| ADGRF5  | rs9395219 | 6  | 46859876  | A | G | 0.1972 | -0.23 | 3.2359E-128 | 0.009547806 | 35559 | 580.26  |
| NOTCH1  | rs9411257 | 9  | 136530146 | A | G | 0.4034 | -0.09 | 9.77237E-26 | 0.008580952 | 35559 | 110     |
| DNAJB12 | rs9416018 | 10 | 72340884  | G | A | 0.3315 | 0.08  | 7.07946E-22 | 0.008322479 | 35559 | 92.4    |
| MFAP2   | rs9435732 | 1  | 16981663  | T | C | 0.2355 | -0.14 | 6.45654E-28 | 0.01278235  | 35559 | 119.95  |
| NT5E    | rs9444349 | 6  | 85502308  | T | C | 0.2915 | 0.21  | 3.3884E-121 | 0.008970565 | 35559 | 547.99  |
| GLO1    | rs9462450 | 6  | 38697164  | C | T | 0.0873 | -0.16 | 2.29087E-29 | 0.01422101  | 35559 | 126.58  |
| CNPY3   | rs9471969 | 6  | 42938646  | T | G | 0.2771 | -0.14 | 2.0893E-54  | 0.009013334 | 35559 | 241.25  |
| LRP11   | rs9479810 | 6  | 149751359 | T | C | 0.3376 | 0.57  | 1E-200      | 0.01481774  | 35559 | 1479.66 |
| MANEA   | rs9488739 | 6  | 95584084  | T | C | 0.1107 | -0.32 | 1E-200      | 0.010539708 | 35559 | 921.76  |
| COL10A1 | rs9488842 | 6  | 116123005 | C | A | 0.2672 | -0.25 | 3.8905E-180 | 0.008735433 | 35559 | 819.01  |
| BPHL    | rs9503407 | 6  | 3143886   | C | T | 0.0755 | 0.21  | 4.89779E-42 | 0.015457928 | 35559 | 184.55  |



|          |           |    |           |   |   |        |       |             |             |       |         |
|----------|-----------|----|-----------|---|---|--------|-------|-------------|-------------|-------|---------|
| POSTN    | rs9532075 | 13 | 37530059  | T | G | 0.3834 | 0.16  | 4.0738E-83  | 0.008284027 | 35559 | 373.02  |
| CPB2     | rs9534312 | 13 | 46076084  | C | T | 0.3402 | 0.5   | 1E-200      | 0.012998017 | 35559 | 1479.66 |
| NT5DC3   | rs954921  | 12 | 103779852 | C | T | 0.378  | 0.17  | 1.99526E-98 | 0.008073531 | 35559 | 443.35  |
| HS6ST3   | rs9562027 | 13 | 96110589  | T | A | 0.4069 | 0.1   | 8.70964E-31 | 0.008668683 | 35559 | 133.07  |
| SHANK3   | rs9616906 | 22 | 50666252  | A | G | 0.4491 | -0.36 | 1E-200      | 0.009358572 | 35559 | 1479.66 |
| C1QTNF5  | rs9640    | 11 | 119339269 | A | T | 0.1348 | 0.28  | 1.6596E-117 | 0.012150261 | 35559 | 531.03  |
| APOC3    | rs964184  | 11 | 116778201 | G | C | 0.1232 | 0.2   | 2.95121E-63 | 0.011912757 | 35559 | 281.85  |
| ST3GAL1  | rs9643300 | 8  | 133490905 | C | T | 0.4973 | 0.25  | 1E-200      | 0.008118687 | 35559 | 948.17  |
| DNER     | rs9646889 | 2  | 229657412 | A | G | 0.4777 | 0.07  | 9.33254E-19 | 0.007916019 | 35559 | 78.19   |
| S100A16  | rs9726753 | 1  | 153619176 | A | G | 0.4316 | 0.19  | 3.2359E-112 | 0.008440303 | 35559 | 506.72  |
| S100A16  | rs9729962 | 1  | 153596510 | C | T | 0.0961 | 0.1   | 6.60693E-13 | 0.013913368 | 35559 | 51.65   |
| MATN4    | rs9784191 | 20 | 45310450  | G | A | 0.2551 | -0.25 | 1.1482E-160 | 0.009256059 | 35559 | 729.46  |
| SPINK7   | rs9784645 | 5  | 148337418 | T | G | 0.2529 | 0.13  | 2.18776E-44 | 0.009301736 | 35559 | 195.31  |
| EPHA5    | rs9790818 | 4  | 65394169  | C | A | 0.1392 | 0.07  | 5.37032E-10 | 0.011275986 | 35559 | 38.54   |
| CACNA2D3 | rs9814659 | 3  | 54562788  | C | T | 0.3347 | -0.06 | 2.63027E-12 | 0.008576103 | 35559 | 48.94   |
| FAM3D    | rs9862196 | 3  | 58630443  | C | T | 0.2162 | -0.08 | 3.01995E-16 | 0.009788894 | 35559 | 66.79   |
| PDCD6IP  | rs9876986 | 3  | 33799573  | G | A | 0.265  | -0.11 | 5.7544E-35  | 0.008916567 | 35559 | 152.18  |
| TIMP2    | rs9894212 | 17 | 78865858  | G | C | 0.2268 | -0.08 | 1.54882E-16 | 0.009693821 | 35559 | 68.1    |
| SPP1     | rs990862  | 4  | 87836661  | C | T | 0.3413 | 0.09  | 3.98107E-24 | 0.008882681 | 35559 | 102.65  |
| PKP2     | rs9919823 | 12 | 32821677  | C | T | 0.0452 | 0.24  | 2.5704E-36  | 0.019071114 | 35559 | 158.36  |
| HDGFRP3  | rs9919979 | 15 | 83080047  | A | C | 0.0642 | 0.18  | 6.76083E-29 | 0.016136101 | 35559 | 124.43  |
| IGFALS   | rs9923699 | 16 | 1794111   | T | C | 0.3015 | -0.14 | 7.07946E-55 | 0.008973336 | 35559 | 243.4   |
| GNPTG    | rs9923746 | 16 | 1390384   | C | G | 0.0794 | 0.52  | 1E-200      | 0.014987984 | 35559 | 1203.64 |
| ZG16B    | rs9925556 | 16 | 2830104   | C | T | 0.2858 | -0.18 | 1E-103      | 0.008322915 | 35559 | 467.7   |
| CHST9    | rs9953270 | 18 | 27107407  | C | T | 0.3298 | 0.26  | 1E-200      | 0.008586468 | 35559 | 916.84  |
| CCDC80   | rs9990056 | 3  | 112764617 | A | G | 0.4096 | -0.05 | 3.98107E-10 | 0.007993902 | 35559 | 39.12   |
| ANXA5    | rs9995591 | 4  | 121694605 | A | G | 0.0684 | 0.26  | 3.98107E-64 | 0.015378054 | 35559 | 285.84  |

**Supplementary Table S3** Instrumental variables for the bidirectional MR analysis

| <b>Exposure SNP</b> | <b>Effect allele</b> | <b>Other allele</b> | <b>Eaf</b> | <b>Beta</b> | <b>Pval</b> | <b>Se</b> | <b>Samplesize</b> | <b>F statistics</b> |             |
|---------------------|----------------------|---------------------|------------|-------------|-------------|-----------|-------------------|---------------------|-------------|
| Acne                | rs10734852           | G                   | A          | 0.4623      | -0.0691     | 1.99E-13  | 0.0094            | 399413              | 54.03786884 |
| Acne                | rs11022666           | T                   | C          | 0.3492      | 0.0772      | 3.194E-15 | 0.0098            | 399413              | 62.05549934 |
| Acne                | rs130291             | A                   | G          | 0.4544      | -0.0582     | 7.834E-10 | 0.0095            | 399413              | 37.53155722 |
| Acne                | rs1481362            | A                   | G          | 0.4184      | 0.0914      | 5.325E-22 | 0.0095            | 399413              | 92.56419024 |
| Acne                | rs174594             | A                   | C          | 0.6207      | -0.0728     | 4.451E-14 | 0.0096            | 399413              | 57.50665649 |
| Acne                | rs2522051            | C                   | T          | 0.5418      | -0.0531     | 1.593E-08 | 0.0094            | 399413              | 31.91032007 |
| Acne                | rs2696958            | T                   | C          | 0.4987      | 0.0598      | 1.928E-10 | 0.0094            | 399413              | 40.47105131 |
| Acne                | rs2957160            | A                   | C          | 0.7946      | -0.0679     | 3.816E-08 | 0.0124            | 399413              | 29.98430615 |
| Acne                | rs3118181            | C                   | T          | 0.4906      | -0.0593     | 3.08E-10  | 0.0094            | 399413              | 39.79710719 |
| Acne                | rs34560261           | T                   | C          | 0.1613      | -0.1499     | 1.055E-28 | 0.0135            | 399413              | 123.2916186 |
| Acne                | rs37776              | T                   | C          | 0.6465      | -0.0922     | 1.039E-20 | 0.0099            | 399413              | 86.73398055 |
| Acne                | rs4760791            | G                   | A          | 0.4141      | -0.061      | 1.143E-09 | 0.01              | 399413              | 37.20981368 |
| Acne                | rs6498135            | G                   | A          | 0.5928      | 0.0559      | 7.394E-09 | 0.0097            | 399413              | 33.21069564 |
| Acne                | rs7410766            | C                   | T          | 0.2154      | 0.0704      | 1.255E-09 | 0.0116            | 399413              | 36.83215802 |
| Acne                | rs8078102            | A                   | C          | 0.7579      | -0.0684     | 3.816E-10 | 0.0109            | 399413              | 39.37830631 |

**Supplementary Table S4** MR results for the primary analysis

| <b>Protein</b> | <b>OR (95% CI)</b> | <b>P value</b> | <b>Author</b> |
|----------------|--------------------|----------------|---------------|
| TIMP4          | 1.15 (1.09, 1.21)  | 1.01E-07       | Sun           |
| MMP12          | 0.95 (0.92, 0.98)  | 9.07E-04       | Sun           |
| LAMC2          | 0.95 (0.91, 0.98)  | 1.06E-03       | Sun           |
| DPP7           | 0.91 (0.86, 0.97)  | 1.62E-03       | Sun           |
| BTD            | 1.05 (1.02, 1.08)  | 2.86E-03       | Emilsson      |
| SERPINA1       | 0.93 (0.88, 0.97)  | 3.40E-03       | Suhre         |
| CDH11          | 1.05 (1.01, 1.08)  | 3.59E-03       | Emilsson      |
| PDE5A          | 0.92 (0.87, 0.98)  | 5.49E-03       | Suhre         |
| CBR3           | 0.97 (0.94, 0.99)  | 6.19E-03       | Sun           |
| TNFRSF19       | 0.85 (0.76, 0.96)  | 6.64E-03       | Emilsson      |
| RNPEP          | 1.08 (1.02, 1.13)  | 6.93E-03       | Emilsson      |
| SHBG           | 0.89 (0.81, 0.97)  | 9.10E-03       | Emilsson      |
| DKK3           | 1.08 (1.02, 1.15)  | 1.00E-02       | Sun           |
| LHB            | 1.10 (1.02, 1.19)  | 1.00E-02       | Sun           |
| ATP1B2         | 1.09 (1.02, 1.17)  | 1.04E-02       | Sun           |
| IL1RN          | 0.88 (0.80, 0.97)  | 1.07E-02       | Sun           |
| AKR1A1         | 0.96 (0.93, 0.99)  | 1.21E-02       | Sun           |
| CROT           | 1.11 (1.02, 1.21)  | 1.48E-02       | Emilsson      |
| F7             | 0.97 (0.94, 0.99)  | 1.60E-02       | Suhre         |
| RSPO3          | 1.09 (1.02, 1.16)  | 1.62E-02       | Sun           |
| LRRC15         | 1.06 (1.01, 1.11)  | 1.65E-02       | Sun           |
| TNFRSF10B      | 1.18 (1.03, 1.34)  | 1.72E-02       | Emilsson      |
| CCL4L1         | 0.90 (0.82, 0.98)  | 1.74E-02       | Emilsson      |
| IDUA           | 1.04 (1.01, 1.07)  | 2.32E-02       | Sun           |
| HPGDS          | 0.95 (0.91, 0.99)  | 2.35E-02       | Sun           |
| HP             | 1.03 (1.00, 1.06)  | 2.46E-02       | Sun           |
| C4BPA          | 1.08 (1.01, 1.15)  | 2.58E-02       | Emilsson      |
| CD177          | 0.97 (0.95, 1.00)  | 2.63E-02       | Sun           |
| CACNA2D3       | 0.89 (0.80, 0.99)  | 2.68E-02       | Sun           |
| CAPN1;CAPNS1   | 0.95 (0.91, 0.99)  | 2.70E-02       | Suhre         |
| C1QL1          | 1.08 (1.01, 1.15)  | 2.84E-02       | Emilsson      |
| KIAA2013       | 0.89 (0.80, 0.99)  | 2.86E-02       | Emilsson      |
| MAPKAPK2       | 1.07 (1.01, 1.14)  | 3.01E-02       | Suhre         |
| CSF2RB         | 1.07 (1.01, 1.14)  | 3.08E-02       | Sun           |
| RNASE1         | 1.11 (1.01, 1.23)  | 3.16E-02       | Sun           |
| VSIR           | 1.11 (1.01, 1.22)  | 3.19E-02       | Sun           |
| MMP1           | 1.07 (1.01, 1.13)  | 3.30E-02       | Folkersen     |
| PLAU           | 1.09 (1.01, 1.18)  | 3.50E-02       | Sun           |
| CSF1           | 0.88 (0.77, 0.99)  | 3.81E-02       | Folkersen     |
| CFI            | 1.07 (1.00, 1.13)  | 4.12E-02       | Sun           |
| FSTL1          | 0.91 (0.83, 1.00)  | 4.22E-02       | Sun           |
| FETUB          | 1.08 (1.00, 1.17)  | 4.35E-02       | Suhre         |
| REG3G          | 0.96 (0.91, 1.00)  | 4.45E-02       | Emilsson      |
| HSP90B1        | 0.98 (0.96, 1.00)  | 4.55E-02       | Sun           |
| CRP            | 0.88 (0.78, 1.00)  | 4.66E-02       | Yao           |
| PLG            | 1.06 (1.00, 1.12)  | 5.01E-02       | Suhre         |
| TIE1           | 0.93 (0.86, 1.00)  | 5.01E-02       | Sun           |
| CD48           | 0.93 (0.86, 1.00)  | 5.22E-02       | Sun           |
| LRP12          | 1.12 (1.00, 1.25)  | 5.22E-02       | Emilsson      |
| SPARCL1        | 1.04 (1.00, 1.07)  | 5.39E-02       | Sun           |
| MCAM           | 1.15 (1.00, 1.33)  | 5.67E-02       | Yao           |
| PATE4          | 1.04 (1.00, 1.09)  | 5.96E-02       | Sun           |

|              |                   |          |           |
|--------------|-------------------|----------|-----------|
| CREB3L4      | 0.93 (0.87, 1.00) | 6.42E-02 | Sun       |
| CCL18        | 1.03 (1.00, 1.06) | 6.61E-02 | Suhre     |
| NPW          | 0.95 (0.91, 1.00) | 6.68E-02 | Sun       |
| CFHR5        | 1.06 (1.00, 1.13) | 6.83E-02 | Sun       |
| TPSAB1;TPSB2 | 1.04 (1.00, 1.08) | 6.93E-02 | Suhre     |
| PCYOX1       | 0.97 (0.93, 1.00) | 7.04E-02 | Emilsson  |
| GDI2         | 1.10 (0.99, 1.22) | 7.32E-02 | Emilsson  |
| CDCP1        | 0.89 (0.78, 1.01) | 7.48E-02 | Emilsson  |
| ISG15        | 0.94 (0.87, 1.01) | 7.52E-02 | Sun       |
| FAM151A      | 1.07 (0.99, 1.15) | 7.58E-02 | Sun       |
| ORM1         | 0.91 (0.81, 1.01) | 7.62E-02 | Yao       |
| APOA1        | 1.07 (0.99, 1.15) | 7.73E-02 | Emilsson  |
| HSPB1        | 0.95 (0.90, 1.01) | 7.77E-02 | Folkersen |
| NPPB         | 1.07 (0.99, 1.14) | 7.83E-02 | Yao       |
| IL17RD       | 1.04 (1.00, 1.09) | 7.93E-02 | Sun       |
| SPINK6       | 0.97 (0.95, 1.00) | 7.98E-02 | Sun       |
| SEMA4C       | 1.07 (0.99, 1.15) | 8.03E-02 | Emilsson  |
| IL12B        | 1.06 (0.99, 1.13) | 8.14E-02 | Sun       |
| RARRES2      | 0.95 (0.90, 1.01) | 8.33E-02 | Suhre     |
| SPINT2       | 1.02 (1.00, 1.04) | 8.40E-02 | Sun       |
| ENTPD1       | 0.92 (0.84, 1.01) | 8.41E-02 | Sun       |
| PDIA3        | 0.89 (0.78, 1.02) | 8.45E-02 | Emilsson  |
| LRIG3        | 0.92 (0.84, 1.01) | 8.55E-02 | Sun       |
| APOF         | 0.92 (0.83, 1.01) | 8.71E-02 | Emilsson  |
| GRN          | 1.06 (0.99, 1.14) | 8.73E-02 | Sun       |
| DNAJC30      | 0.94 (0.87, 1.01) | 8.74E-02 | Sun       |
| EVA1C        | 0.91 (0.82, 1.01) | 8.97E-02 | Sun       |
| NCAM1        | 0.95 (0.90, 1.01) | 9.06E-02 | Yao       |
| PSAP         | 0.97 (0.94, 1.01) | 9.44E-02 | Emilsson  |
| IL7          | 1.07 (0.99, 1.17) | 9.51E-02 | Emilsson  |
| OXT          | 0.97 (0.94, 1.01) | 9.68E-02 | Emilsson  |
| ADAM23       | 1.04 (0.99, 1.09) | 9.69E-02 | Sun       |
| ST3GAL6      | 1.02 (1.00, 1.04) | 1.02E-01 | Sun       |
| CTSF         | 0.93 (0.85, 1.02) | 1.04E-01 | Sun       |
| SPINK2       | 1.06 (0.99, 1.14) | 1.04E-01 | Sun       |
| CTSD         | 1.05 (0.99, 1.11) | 1.06E-01 | Folkersen |
| DKK2         | 1.05 (0.99, 1.10) | 1.07E-01 | Emilsson  |
| VIT          | 1.05 (0.99, 1.11) | 1.09E-01 | Sun       |
| PZP          | 0.97 (0.93, 1.01) | 1.10E-01 | Emilsson  |
| DLL1         | 1.08 (0.98, 1.19) | 1.12E-01 | Sun       |
| GFRA1        | 1.07 (0.98, 1.15) | 1.18E-01 | Sun       |
| FUT10        | 1.04 (0.99, 1.08) | 1.19E-01 | Sun       |
| KIAA1549L    | 0.96 (0.92, 1.01) | 1.22E-01 | Emilsson  |
| BCAN         | 1.09 (0.98, 1.20) | 1.23E-01 | Emilsson  |
| NAGK         | 0.95 (0.89, 1.01) | 1.26E-01 | Sun       |
| TYRO3        | 0.91 (0.80, 1.03) | 1.27E-01 | Emilsson  |
| CXCL10       | 0.90 (0.78, 1.03) | 1.28E-01 | Emilsson  |
| ERO1B        | 1.04 (0.99, 1.09) | 1.28E-01 | Sun       |
| ITIH5        | 1.05 (0.99, 1.13) | 1.28E-01 | Sun       |
| GLTPD2       | 0.94 (0.87, 1.02) | 1.31E-01 | Sun       |
| TMEM132A     | 1.03 (0.99, 1.06) | 1.31E-01 | Sun       |
| IFI16        | 0.96 (0.92, 1.01) | 1.33E-01 | Sun       |
| RAB6B        | 0.93 (0.85, 1.02) | 1.34E-01 | Emilsson  |
| MFGE8        | 0.94 (0.86, 1.02) | 1.36E-01 | Sun       |

|          |                   |          |           |
|----------|-------------------|----------|-----------|
| ANG      | 1.03 (0.99, 1.07) | 1.39E-01 | Suhre     |
| DUT      | 1.10 (0.97, 1.26) | 1.39E-01 | Emilsson  |
| VEGFA    | 1.02 (0.99, 1.05) | 1.39E-01 | Sun       |
| FCRL6    | 1.03 (0.99, 1.07) | 1.40E-01 | Sun       |
| SIRPB1   | 0.98 (0.95, 1.01) | 1.41E-01 | Sun       |
| B4GALT1  | 1.05 (0.98, 1.13) | 1.45E-01 | Sun       |
| IL7R     | 0.97 (0.93, 1.01) | 1.45E-01 | Suhre     |
| NTN4     | 0.94 (0.86, 1.02) | 1.47E-01 | Sun       |
| PTHLH    | 1.09 (0.97, 1.21) | 1.48E-01 | Sun       |
| CXCL11   | 1.06 (0.98, 1.15) | 1.51E-01 | Sun       |
| IGFBP7   | 0.96 (0.90, 1.02) | 1.51E-01 | Sun       |
| OBP2B    | 0.96 (0.91, 1.02) | 1.51E-01 | Sun       |
| DCBLD2   | 1.05 (0.98, 1.12) | 1.54E-01 | Sun       |
| IL18     | 1.05 (0.98, 1.13) | 1.54E-01 | Folkersen |
| LGALS9   | 1.08 (0.97, 1.20) | 1.55E-01 | Emilsson  |
| OAF      | 1.04 (0.98, 1.10) | 1.55E-01 | Sun       |
| CST1     | 0.98 (0.94, 1.01) | 1.58E-01 | Suhre     |
| CST2     | 0.97 (0.94, 1.01) | 1.58E-01 | Suhre     |
| LCT      | 1.02 (0.99, 1.04) | 1.58E-01 | Sun       |
| SFTPB    | 1.02 (0.99, 1.05) | 1.59E-01 | Emilsson  |
| ERLEC1   | 0.93 (0.83, 1.03) | 1.61E-01 | Sun       |
| CCL3L1   | 1.04 (0.98, 1.10) | 1.65E-01 | Sun       |
| QDPR     | 1.03 (0.99, 1.07) | 1.66E-01 | Sun       |
| C9       | 1.13 (0.95, 1.34) | 1.70E-01 | Emilsson  |
| JAM3     | 1.07 (0.97, 1.19) | 1.72E-01 | Emilsson  |
| SERPINA3 | 0.96 (0.92, 1.02) | 1.74E-01 | Suhre     |
| THBS2    | 1.03 (0.99, 1.07) | 1.74E-01 | Sun       |
| THBS4    | 1.09 (0.96, 1.24) | 1.74E-01 | Emilsson  |
| NAAA     | 0.98 (0.94, 1.01) | 1.76E-01 | Sun       |
| MMP7     | 0.96 (0.90, 1.02) | 1.78E-01 | Suhre     |
| ACP6     | 1.02 (0.99, 1.04) | 1.81E-01 | Emilsson  |
| MFAP2    | 0.94 (0.86, 1.03) | 1.81E-01 | Sun       |
| ST3GAL1  | 0.95 (0.89, 1.02) | 1.81E-01 | Sun       |
| UNC5D    | 1.09 (0.96, 1.25) | 1.84E-01 | Emilsson  |
| ADAM12   | 0.94 (0.85, 1.03) | 1.87E-01 | Emilsson  |
| CTGF     | 0.96 (0.90, 1.02) | 1.87E-01 | Emilsson  |
| LILRB5   | 0.99 (0.97, 1.01) | 1.87E-01 | Sun       |
| PRDX6    | 0.96 (0.91, 1.02) | 1.90E-01 | Emilsson  |
| FAM3B    | 0.97 (0.92, 1.02) | 1.91E-01 | Sun       |
| WISP1    | 1.03 (0.98, 1.09) | 1.93E-01 | Sun       |
| PLXNC1   | 0.97 (0.93, 1.01) | 1.94E-01 | Sun       |
| MANSC1   | 1.04 (0.98, 1.10) | 1.97E-01 | Sun       |
| CA8      | 1.07 (0.97, 1.18) | 1.98E-01 | Emilsson  |
| CRHBP    | 0.97 (0.94, 1.01) | 1.98E-01 | Emilsson  |
| COL15A1  | 1.06 (0.97, 1.15) | 2.02E-01 | Sun       |
| AMY2B    | 1.04 (0.98, 1.11) | 2.03E-01 | Emilsson  |
| PXDN     | 0.93 (0.82, 1.04) | 2.07E-01 | Emilsson  |
| PSMB1    | 0.97 (0.93, 1.02) | 2.08E-01 | Emilsson  |
| TGFB1    | 0.95 (0.89, 1.03) | 2.08E-01 | Emilsson  |
| CDON     | 0.98 (0.94, 1.01) | 2.12E-01 | Suhre     |
| HBZ      | 1.01 (0.99, 1.04) | 2.22E-01 | Sun       |
| GP5      | 1.08 (0.95, 1.23) | 2.25E-01 | Yao       |
| SIGLEC14 | 1.01 (0.99, 1.03) | 2.28E-01 | Sun       |
| CST4     | 0.95 (0.88, 1.03) | 2.31E-01 | Emilsson  |

|                   |                   |          |          |
|-------------------|-------------------|----------|----------|
| ENTPD5            | 1.03 (0.98, 1.07) | 2.31E-01 | Sun      |
| TREM2             | 0.88 (0.71, 1.09) | 2.31E-01 | Emilsson |
| VWC2              | 1.05 (0.97, 1.15) | 2.31E-01 | Emilsson |
| CNDP1             | 0.97 (0.92, 1.02) | 2.33E-01 | Suhre    |
| IL16              | 1.03 (0.98, 1.09) | 2.34E-01 | Sun      |
| TEK               | 0.95 (0.87, 1.04) | 2.40E-01 | Sun      |
| GP6               | 0.97 (0.93, 1.02) | 2.42E-01 | Suhre    |
| TNFSF12;TNFSF12-T | 0.97 (0.92, 1.02) | 2.42E-01 | Sun      |
| ALDH3A1           | 0.95 (0.88, 1.03) | 2.43E-01 | Sun      |
| QPCT              | 0.96 (0.90, 1.03) | 2.43E-01 | Emilsson |
| CPB1              | 0.95 (0.87, 1.04) | 2.46E-01 | Sun      |
| SPATA20           | 1.05 (0.97, 1.14) | 2.48E-01 | Sun      |
| PKDCC             | 0.95 (0.87, 1.04) | 2.50E-01 | Emilsson |
| TAPBPL            | 1.01 (0.99, 1.03) | 2.51E-01 | Sun      |
| PREP              | 1.04 (0.98, 1.10) | 2.52E-01 | Emilsson |
| INPP5B            | 1.04 (0.97, 1.10) | 2.54E-01 | Emilsson |
| FUT8              | 0.99 (0.96, 1.01) | 2.55E-01 | Sun      |
| PLA2R1            | 0.99 (0.97, 1.01) | 2.55E-01 | Sun      |
| BTNL8             | 1.04 (0.97, 1.12) | 2.57E-01 | Emilsson |
| CHIT1             | 1.01 (0.99, 1.04) | 2.57E-01 | Sun      |
| EDAR              | 1.03 (0.98, 1.08) | 2.59E-01 | Suhre    |
| RGMB              | 0.95 (0.87, 1.04) | 2.59E-01 | Sun      |
| SCARF2            | 1.05 (0.97, 1.13) | 2.60E-01 | Sun      |
| ISLR2             | 0.94 (0.85, 1.04) | 2.63E-01 | Sun      |
| PYY               | 0.93 (0.81, 1.06) | 2.65E-01 | Emilsson |
| MANBA             | 0.98 (0.95, 1.01) | 2.66E-01 | Sun      |
| RETN              | 1.05 (0.96, 1.14) | 2.66E-01 | Sun      |
| FTCD              | 1.11 (0.93, 1.32) | 2.68E-01 | Emilsson |
| LIPN              | 1.01 (0.99, 1.03) | 2.70E-01 | Sun      |
| FAM171B           | 0.96 (0.90, 1.03) | 2.73E-01 | Sun      |
| DLK1              | 0.98 (0.95, 1.02) | 2.79E-01 | Sun      |
| ADH7              | 0.96 (0.90, 1.03) | 2.80E-01 | Emilsson |
| PDLIM4            | 0.98 (0.93, 1.02) | 2.81E-01 | Emilsson |
| LGMN              | 1.07 (0.95, 1.20) | 2.82E-01 | Emilsson |
| B3GNT8            | 0.99 (0.96, 1.01) | 2.83E-01 | Emilsson |
| CST3              | 0.97 (0.92, 1.03) | 2.83E-01 | Yao      |
| CTSC              | 1.02 (0.98, 1.06) | 2.84E-01 | Emilsson |
| SERPINF1          | 0.98 (0.94, 1.02) | 2.84E-01 | Sun      |
| CTSH              | 1.01 (0.99, 1.04) | 2.86E-01 | Sun      |
| CCL14             | 1.02 (0.98, 1.06) | 2.87E-01 | Sun      |
| TNFAIP6           | 0.98 (0.95, 1.02) | 2.88E-01 | Sun      |
| SLAMF7            | 1.01 (0.99, 1.04) | 2.89E-01 | Sun      |
| EPHB2             | 1.02 (0.98, 1.07) | 2.91E-01 | Sun      |
| QSOX2             | 0.97 (0.92, 1.03) | 2.99E-01 | Sun      |
| APOB              | 0.97 (0.91, 1.03) | 3.07E-01 | Suhre    |
| SPINT3            | 1.02 (0.98, 1.05) | 3.07E-01 | Sun      |
| SULT2A1           | 0.96 (0.89, 1.04) | 3.10E-01 | Emilsson |
| MAN1C1            | 0.94 (0.84, 1.06) | 3.12E-01 | Emilsson |
| SPOCK2            | 0.96 (0.88, 1.04) | 3.12E-01 | Sun      |
| QPCTL             | 0.96 (0.90, 1.03) | 3.13E-01 | Sun      |
| NEO1              | 1.05 (0.95, 1.16) | 3.14E-01 | Sun      |
| NT5C              | 1.04 (0.96, 1.12) | 3.14E-01 | Sun      |
| COCH              | 1.03 (0.97, 1.10) | 3.17E-01 | Sun      |
| PLEKHA7           | 0.94 (0.84, 1.06) | 3.17E-01 | Sun      |

|           |                   |          |          |
|-----------|-------------------|----------|----------|
| SEMA3G    | 1.05 (0.95, 1.17) | 3.17E-01 | Sun      |
| SIRPA     | 1.01 (0.99, 1.02) | 3.17E-01 | Sun      |
| FAM3D     | 1.03 (0.97, 1.09) | 3.21E-01 | Sun      |
| GFRAL     | 1.05 (0.95, 1.16) | 3.21E-01 | Sun      |
| HGFAC     | 1.02 (0.98, 1.07) | 3.21E-01 | Suhre    |
| IGFLR1    | 1.02 (0.98, 1.06) | 3.24E-01 | Sun      |
| FLRT3     | 1.02 (0.98, 1.07) | 3.26E-01 | Sun      |
| LRRN1     | 0.96 (0.89, 1.04) | 3.38E-01 | Sun      |
| ALPP      | 0.97 (0.91, 1.03) | 3.40E-01 | Emilsson |
| UROS      | 1.05 (0.95, 1.17) | 3.41E-01 | Sun      |
| CPM       | 0.95 (0.85, 1.06) | 3.45E-01 | Sun      |
| CKM       | 1.06 (0.94, 1.20) | 3.48E-01 | Sun      |
| SPON1     | 0.98 (0.93, 1.03) | 3.49E-01 | Sun      |
| CD59      | 0.97 (0.92, 1.03) | 3.50E-01 | Sun      |
| PLA2G2A   | 1.01 (0.99, 1.03) | 3.52E-01 | Sun      |
| GSTO1     | 0.99 (0.97, 1.01) | 3.58E-01 | Sun      |
| RTN4R     | 0.97 (0.91, 1.03) | 3.58E-01 | Sun      |
| IGLL1     | 0.97 (0.91, 1.04) | 3.64E-01 | Sun      |
| KDR       | 0.98 (0.94, 1.02) | 3.65E-01 | Sun      |
| ARFIP1    | 1.04 (0.96, 1.12) | 3.66E-01 | Sun      |
| GPC5      | 0.97 (0.92, 1.03) | 3.69E-01 | Sun      |
| CTSS      | 1.02 (0.98, 1.07) | 3.71E-01 | Sun      |
| PTGFRN    | 0.99 (0.97, 1.01) | 3.72E-01 | Sun      |
| HS6ST1    | 1.04 (0.96, 1.12) | 3.74E-01 | Sun      |
| GKN2      | 0.98 (0.94, 1.02) | 3.77E-01 | Emilsson |
| SERPINA11 | 1.04 (0.95, 1.13) | 3.79E-01 | Emilsson |
| CXCL6     | 0.99 (0.97, 1.01) | 3.80E-01 | Suhre    |
| CNTFR     | 0.96 (0.88, 1.05) | 3.82E-01 | Sun      |
| CALCOCO2  | 0.94 (0.81, 1.08) | 3.84E-01 | Emilsson |
| NTN1      | 0.98 (0.93, 1.03) | 3.85E-01 | Sun      |
| RSPO4     | 1.05 (0.94, 1.17) | 3.87E-01 | Emilsson |
| WFIKKN1   | 1.05 (0.94, 1.18) | 3.88E-01 | Emilsson |
| GSTM3     | 0.93 (0.80, 1.09) | 3.89E-01 | Emilsson |
| VWA2      | 1.04 (0.95, 1.13) | 3.91E-01 | Emilsson |
| CYB5D2    | 1.05 (0.94, 1.19) | 3.92E-01 | Emilsson |
| DSC2      | 0.96 (0.86, 1.06) | 3.97E-01 | Sun      |
| CNTN1     | 0.96 (0.88, 1.05) | 4.00E-01 | Yao      |
| S100A4    | 0.96 (0.89, 1.05) | 4.02E-01 | Sun      |
| FAM213A   | 0.96 (0.86, 1.06) | 4.03E-01 | Sun      |
| COL18A1   | 0.95 (0.84, 1.07) | 4.06E-01 | Yao      |
| CRISP2    | 1.01 (0.98, 1.05) | 4.06E-01 | Sun      |
| MAN1A2    | 0.96 (0.87, 1.06) | 4.09E-01 | Emilsson |
| POMGNT2   | 1.03 (0.96, 1.11) | 4.11E-01 | Sun      |
| APCS      | 0.98 (0.92, 1.04) | 4.12E-01 | Sun      |
| AMY1A     | 0.98 (0.95, 1.02) | 4.14E-01 | Sun      |
| AHSG      | 1.01 (0.98, 1.05) | 4.16E-01 | Sun      |
| AOC1      | 1.01 (0.99, 1.04) | 4.17E-01 | Emilsson |
| TCN2      | 0.99 (0.96, 1.02) | 4.18E-01 | Sun      |
| CTSB      | 0.98 (0.93, 1.03) | 4.22E-01 | Sun      |
| NELL1     | 1.02 (0.98, 1.05) | 4.30E-01 | Sun      |
| LRP8      | 0.95 (0.84, 1.08) | 4.35E-01 | Emilsson |
| RNASE4    | 1.02 (0.97, 1.07) | 4.35E-01 | Sun      |
| CLEC4C    | 0.99 (0.97, 1.01) | 4.36E-01 | Emilsson |
| SELPLG    | 0.96 (0.86, 1.07) | 4.36E-01 | Emilsson |

|          |                   |          |          |
|----------|-------------------|----------|----------|
| NRP2     | 1.04 (0.94, 1.15) | 4.40E-01 | Sun      |
| TIMP3    | 0.99 (0.97, 1.01) | 4.41E-01 | Suhre    |
| OLFM2    | 0.99 (0.96, 1.02) | 4.42E-01 | Emilsson |
| CLEC1B   | 0.98 (0.94, 1.03) | 4.43E-01 | Emilsson |
| APOL1    | 0.96 (0.88, 1.06) | 4.44E-01 | Sun      |
| MBL2     | 1.01 (0.99, 1.03) | 4.44E-01 | Sun      |
| CBLN1    | 1.01 (0.98, 1.04) | 4.45E-01 | Sun      |
| GZMM     | 1.04 (0.95, 1.13) | 4.46E-01 | Sun      |
| REG1A    | 1.03 (0.96, 1.10) | 4.46E-01 | Yao      |
| GNPTG    | 1.04 (0.94, 1.16) | 4.48E-01 | Emilsson |
| TREM1    | 0.98 (0.92, 1.04) | 4.48E-01 | Emilsson |
| TF       | 0.97 (0.89, 1.05) | 4.49E-01 | Emilsson |
| CPZ      | 0.96 (0.88, 1.06) | 4.50E-01 | Sun      |
| TCN1     | 0.98 (0.92, 1.04) | 4.51E-01 | Sun      |
| GNRH2    | 0.97 (0.88, 1.06) | 4.52E-01 | Sun      |
| UBASH3B  | 1.04 (0.93, 1.16) | 4.52E-01 | Emilsson |
| MTHFS    | 0.97 (0.88, 1.06) | 4.53E-01 | Sun      |
| SIGLEC6  | 1.01 (0.98, 1.04) | 4.53E-01 | Suhre    |
| TPST1    | 1.03 (0.95, 1.12) | 4.53E-01 | Sun      |
| AZU1     | 0.97 (0.88, 1.06) | 4.59E-01 | Emilsson |
| SERPINF2 | 1.03 (0.95, 1.13) | 4.63E-01 | Sun      |
| ALCAM    | 1.03 (0.94, 1.13) | 4.64E-01 | Sun      |
| GSTA1    | 1.02 (0.97, 1.07) | 4.68E-01 | Sun      |
| PCOLCE   | 0.97 (0.89, 1.06) | 4.68E-01 | Sun      |
| MGAT2    | 0.97 (0.88, 1.06) | 4.69E-01 | Sun      |
| CD55     | 0.99 (0.95, 1.03) | 4.72E-01 | Sun      |
| VEGFC    | 1.01 (0.98, 1.05) | 4.73E-01 | Sun      |
| MGP      | 0.97 (0.90, 1.05) | 4.74E-01 | Yao      |
| NFASC    | 0.99 (0.95, 1.02) | 4.76E-01 | Sun      |
| SPINK1   | 1.03 (0.94, 1.13) | 4.79E-01 | Emilsson |
| PF4V1    | 0.98 (0.94, 1.03) | 4.82E-01 | Sun      |
| METTL24  | 1.04 (0.93, 1.16) | 4.84E-01 | Emilsson |
| IL12RB2  | 1.03 (0.95, 1.12) | 4.85E-01 | Sun      |
| NPNT     | 0.96 (0.87, 1.07) | 4.85E-01 | Emilsson |
| B3GLCT   | 1.03 (0.95, 1.11) | 4.86E-01 | Emilsson |
| CLMP     | 1.03 (0.95, 1.11) | 4.86E-01 | Sun      |
| CD300A   | 0.98 (0.93, 1.03) | 4.87E-01 | Emilsson |
| PLXNB2   | 1.01 (0.98, 1.05) | 4.87E-01 | Sun      |
| CCL8     | 0.98 (0.93, 1.04) | 4.89E-01 | Suhre    |
| LEPR     | 1.01 (0.99, 1.03) | 4.89E-01 | Sun      |
| AFP      | 0.96 (0.85, 1.08) | 4.90E-01 | Emilsson |
| CPQ      | 1.02 (0.96, 1.08) | 4.92E-01 | Emilsson |
| CST7     | 0.99 (0.96, 1.02) | 4.95E-01 | Suhre    |
| GFRA2    | 0.98 (0.92, 1.04) | 4.96E-01 | Sun      |
| GPNMB    | 1.02 (0.96, 1.09) | 4.98E-01 | Sun      |
| MRC2     | 1.04 (0.93, 1.16) | 4.98E-01 | Sun      |
| SMOC1    | 1.03 (0.95, 1.12) | 4.98E-01 | Sun      |
| TXNDC15  | 1.03 (0.95, 1.12) | 4.98E-01 | Emilsson |
| PDCD1LG2 | 0.98 (0.93, 1.04) | 4.99E-01 | Sun      |
| ASIP     | 0.99 (0.94, 1.03) | 5.00E-01 | Emilsson |
| B4GALT2  | 0.98 (0.91, 1.05) | 5.04E-01 | Sun      |
| CA13     | 1.02 (0.97, 1.07) | 5.04E-01 | Suhre    |
| SFRP4    | 1.04 (0.93, 1.15) | 5.08E-01 | Emilsson |
| ADIPOQ   | 1.05 (0.91, 1.20) | 5.09E-01 | Emilsson |



|               |                   |          |           |
|---------------|-------------------|----------|-----------|
| ADAM19        | 0.97 (0.90, 1.05) | 5.16E-01 | Emilsson  |
| IFNAR1        | 1.04 (0.93, 1.15) | 5.17E-01 | Sun       |
| TPST2         | 0.98 (0.90, 1.05) | 5.21E-01 | Sun       |
| LRRC4C        | 1.05 (0.91, 1.20) | 5.25E-01 | Emilsson  |
| WFDC5         | 1.03 (0.93, 1.15) | 5.33E-01 | Emilsson  |
| C5            | 1.03 (0.93, 1.15) | 5.34E-01 | Emilsson  |
| KIAA1161      | 1.02 (0.96, 1.09) | 5.34E-01 | Sun       |
| POSTN         | 0.97 (0.90, 1.06) | 5.35E-01 | Emilsson  |
| XXYL1         | 0.97 (0.88, 1.07) | 5.37E-01 | Emilsson  |
| REG4          | 0.97 (0.87, 1.08) | 5.40E-01 | Sun       |
| CCL5          | 0.98 (0.91, 1.05) | 5.44E-01 | Suhre     |
| CREG1         | 1.03 (0.94, 1.12) | 5.49E-01 | Sun       |
| CSGALNACT2    | 0.97 (0.87, 1.08) | 5.50E-01 | Sun       |
| CNP           | 1.03 (0.93, 1.16) | 5.52E-01 | Emilsson  |
| PPP3CA;PPP3R1 | 1.02 (0.96, 1.07) | 5.52E-01 | Suhre     |
| RPN1          | 0.98 (0.93, 1.04) | 5.60E-01 | Sun       |
| ADAMTS13      | 1.01 (0.97, 1.05) | 5.62E-01 | Sun       |
| BPIFA2        | 1.06 (0.87, 1.28) | 5.62E-01 | Emilsson  |
| GALNT16       | 1.03 (0.93, 1.14) | 5.64E-01 | Emilsson  |
| FCER2         | 0.98 (0.93, 1.04) | 5.66E-01 | Sun       |
| EMILIN3       | 0.98 (0.90, 1.06) | 5.69E-01 | Sun       |
| PTGR1         | 0.98 (0.91, 1.05) | 5.69E-01 | Emilsson  |
| ALPG          | 0.97 (0.88, 1.07) | 5.75E-01 | Emilsson  |
| RNASE3        | 1.03 (0.93, 1.15) | 5.75E-01 | Emilsson  |
| CRTAM         | 0.98 (0.90, 1.06) | 5.79E-01 | Emilsson  |
| RET           | 1.02 (0.94, 1.11) | 5.79E-01 | Sun       |
| NAGPA         | 1.02 (0.96, 1.08) | 5.84E-01 | Sun       |
| FAM20A        | 1.02 (0.94, 1.11) | 5.86E-01 | Sun       |
| HIBCH         | 0.99 (0.96, 1.02) | 5.89E-01 | Emilsson  |
| SIGLEC9       | 1.00 (0.98, 1.01) | 5.90E-01 | Sun       |
| CFHR1         | 0.99 (0.97, 1.02) | 5.91E-01 | Emilsson  |
| DYNLL2        | 1.04 (0.90, 1.19) | 5.93E-01 | Emilsson  |
| IGDCC4        | 1.02 (0.94, 1.11) | 5.94E-01 | Emilsson  |
| CLEC11A       | 1.04 (0.90, 1.19) | 5.95E-01 | Emilsson  |
| FLT4          | 1.02 (0.95, 1.10) | 5.95E-01 | Sun       |
| PNLIPRP2      | 1.01 (0.99, 1.02) | 5.95E-01 | Emilsson  |
| SECTM1        | 1.02 (0.95, 1.09) | 5.95E-01 | Sun       |
| GPLY          | 1.01 (0.98, 1.04) | 5.99E-01 | Sun       |
| TMEM132C      | 1.02 (0.94, 1.12) | 5.99E-01 | Sun       |
| MTRF1L        | 0.97 (0.87, 1.09) | 6.02E-01 | Sun       |
| HSD17B14      | 0.96 (0.84, 1.10) | 6.03E-01 | Emilsson  |
| CPNE1         | 0.99 (0.96, 1.02) | 6.04E-01 | Sun       |
| CA3           | 0.97 (0.86, 1.09) | 6.06E-01 | Sun       |
| ASPN          | 0.99 (0.95, 1.03) | 6.07E-01 | Sun       |
| SVEP1         | 1.01 (0.96, 1.06) | 6.14E-01 | Sun       |
| PENK          | 1.01 (0.97, 1.05) | 6.17E-01 | Sun       |
| PTGDS         | 0.98 (0.89, 1.07) | 6.21E-01 | Sun       |
| SPOCK3        | 1.02 (0.95, 1.08) | 6.27E-01 | Sun       |
| ART4          | 1.01 (0.98, 1.03) | 6.31E-01 | Sun       |
| CST6          | 1.03 (0.92, 1.14) | 6.32E-01 | Sun       |
| GGH           | 0.99 (0.95, 1.03) | 6.34E-01 | Sun       |
| CYTL1         | 1.02 (0.95, 1.10) | 6.38E-01 | Emilsson  |
| LGALS3        | 1.01 (0.97, 1.05) | 6.43E-01 | Folkersen |
| SHMT1         | 0.99 (0.93, 1.05) | 6.43E-01 | Emilsson  |

|          |                   |          |          |
|----------|-------------------|----------|----------|
| CD200R1  | 0.97 (0.87, 1.09) | 6.46E-01 | Sun      |
| LGALS3BP | 1.03 (0.91, 1.16) | 6.47E-01 | Emilsson |
| DNER     | 0.97 (0.86, 1.10) | 6.49E-01 | Emilsson |
| OLFM1    | 1.03 (0.91, 1.16) | 6.53E-01 | Emilsson |
| HDHD2    | 0.99 (0.95, 1.04) | 6.54E-01 | Sun      |
| OAS1     | 0.98 (0.91, 1.06) | 6.54E-01 | Sun      |
| IL11RA   | 1.02 (0.95, 1.09) | 6.58E-01 | Sun      |
| CD33     | 1.00 (0.98, 1.03) | 6.60E-01 | Sun      |
| CP       | 0.98 (0.90, 1.07) | 6.64E-01 | Yao      |
| WFIKKN2  | 0.99 (0.96, 1.02) | 6.65E-01 | Sun      |
| CNTN5    | 1.01 (0.97, 1.06) | 6.66E-01 | Suhre    |
| PDIA5    | 1.01 (0.97, 1.05) | 6.68E-01 | Sun      |
| PDCD5    | 0.99 (0.93, 1.05) | 6.69E-01 | Sun      |
| NOV      | 0.98 (0.87, 1.09) | 6.71E-01 | Sun      |
| HDGF     | 0.99 (0.92, 1.06) | 6.77E-01 | Emilsson |
| NPTXR    | 0.99 (0.93, 1.05) | 6.78E-01 | Emilsson |
| PCBD1    | 1.02 (0.91, 1.15) | 6.78E-01 | Emilsson |
| C3       | 1.02 (0.93, 1.12) | 6.80E-01 | Emilsson |
| FGFR3    | 1.02 (0.91, 1.15) | 6.81E-01 | Emilsson |
| ADGRE2   | 1.01 (0.95, 1.09) | 6.82E-01 | Suhre    |
| CNTN4    | 1.01 (0.95, 1.09) | 6.84E-01 | Sun      |
| WARS     | 1.02 (0.94, 1.11) | 6.84E-01 | Emilsson |
| NCAM2    | 0.99 (0.94, 1.05) | 6.89E-01 | Emilsson |
| RBP4     | 1.03 (0.90, 1.17) | 6.89E-01 | Emilsson |
| APMAP    | 1.02 (0.91, 1.15) | 6.91E-01 | Sun      |
| C1RL     | 1.02 (0.94, 1.09) | 6.93E-01 | Emilsson |
| ANGPTL1  | 1.01 (0.96, 1.06) | 6.94E-01 | Sun      |
| IL17RA   | 1.00 (0.97, 1.02) | 6.96E-01 | Suhre    |
| ROR1     | 0.99 (0.94, 1.04) | 6.98E-01 | Sun      |
| IL1RAP   | 1.00 (0.98, 1.03) | 7.01E-01 | Sun      |
| GPC1     | 0.99 (0.93, 1.05) | 7.02E-01 | Sun      |
| PTPRU    | 0.97 (0.86, 1.11) | 7.02E-01 | Emilsson |
| PSAPL1   | 0.99 (0.95, 1.03) | 7.03E-01 | Sun      |
| CBLN4    | 1.02 (0.92, 1.14) | 7.06E-01 | Sun      |
| AP1G2    | 1.02 (0.91, 1.16) | 7.13E-01 | Emilsson |
| PEAR1    | 1.02 (0.93, 1.11) | 7.13E-01 | Sun      |
| DPT      | 1.01 (0.96, 1.06) | 7.18E-01 | Sun      |
| NTM      | 0.99 (0.94, 1.04) | 7.18E-01 | Emilsson |
| IL27RA   | 1.00 (0.97, 1.02) | 7.20E-01 | Sun      |
| HPX      | 0.98 (0.90, 1.07) | 7.23E-01 | Yao      |
| NTRK3    | 1.02 (0.90, 1.16) | 7.25E-01 | Emilsson |
| SHANK3   | 1.01 (0.95, 1.08) | 7.29E-01 | Emilsson |
| NRP1     | 1.01 (0.95, 1.08) | 7.31E-01 | Sun      |
| TMEM132D | 0.98 (0.90, 1.08) | 7.31E-01 | Emilsson |
| ENDOU    | 0.98 (0.86, 1.11) | 7.32E-01 | Emilsson |
| COLEC12  | 1.02 (0.90, 1.16) | 7.35E-01 | Sun      |
| ESD      | 1.01 (0.96, 1.05) | 7.36E-01 | Sun      |
| ITIH2    | 1.00 (0.97, 1.02) | 7.36E-01 | Emilsson |
| CRLF1    | 0.99 (0.91, 1.07) | 7.41E-01 | Emilsson |
| KLK10    | 1.01 (0.96, 1.06) | 7.44E-01 | Emilsson |
| CA1      | 0.98 (0.86, 1.12) | 7.62E-01 | Emilsson |
| SOD3     | 1.01 (0.96, 1.06) | 7.63E-01 | Emilsson |
| PI3      | 1.01 (0.95, 1.07) | 7.65E-01 | Sun      |
| CCDC126  | 0.99 (0.93, 1.06) | 7.66E-01 | Sun      |

|          |                   |          |          |
|----------|-------------------|----------|----------|
| CD14     | 0.99 (0.93, 1.05) | 7.70E-01 | Yao      |
| PLXNA1   | 0.98 (0.88, 1.10) | 7.71E-01 | Emilsson |
| SPON2    | 1.01 (0.92, 1.12) | 7.71E-01 | Emilsson |
| SERPINA4 | 1.00 (0.97, 1.04) | 7.72E-01 | Sun      |
| TFF1     | 1.01 (0.92, 1.12) | 7.75E-01 | Sun      |
| ADH4     | 1.02 (0.90, 1.15) | 7.79E-01 | Emilsson |
| MXRA7    | 1.01 (0.93, 1.10) | 7.79E-01 | Sun      |
| PRCP     | 0.99 (0.90, 1.08) | 7.81E-01 | Sun      |
| NTNG1    | 0.99 (0.95, 1.04) | 7.84E-01 | Sun      |
| RELT     | 1.01 (0.96, 1.06) | 7.84E-01 | Sun      |
| SEMA3C   | 1.02 (0.91, 1.14) | 7.89E-01 | Sun      |
| SPINK5   | 1.02 (0.90, 1.15) | 7.89E-01 | Emilsson |
| RRM2B    | 0.99 (0.88, 1.10) | 7.93E-01 | Sun      |
| RNASE2   | 1.01 (0.93, 1.09) | 8.01E-01 | Sun      |
| IL5RA    | 0.99 (0.93, 1.06) | 8.03E-01 | Sun      |
| FGL1     | 1.01 (0.96, 1.05) | 8.10E-01 | Emilsson |
| SEMA5A   | 1.00 (0.97, 1.02) | 8.11E-01 | Sun      |
| GPX7     | 0.99 (0.95, 1.04) | 8.12E-01 | Sun      |
| GLCE     | 1.00 (0.97, 1.02) | 8.13E-01 | Sun      |
| IL1R2    | 0.99 (0.95, 1.04) | 8.15E-01 | Sun      |
| UCMA     | 1.01 (0.94, 1.08) | 8.16E-01 | Sun      |
| VAV1     | 1.01 (0.90, 1.14) | 8.17E-01 | Emilsson |
| C1QC     | 1.00 (0.96, 1.05) | 8.19E-01 | Sun      |
| NPTX1    | 1.01 (0.94, 1.08) | 8.19E-01 | Sun      |
| GLO1     | 1.01 (0.90, 1.13) | 8.21E-01 | Emilsson |
| ZG16B    | 1.02 (0.89, 1.16) | 8.21E-01 | Emilsson |
| FCGR3B   | 1.01 (0.96, 1.05) | 8.22E-01 | Sun      |
| GP1BA    | 0.99 (0.89, 1.10) | 8.22E-01 | Sun      |
| LY9      | 1.01 (0.96, 1.05) | 8.22E-01 | Suhre    |
| CDNF     | 1.01 (0.93, 1.10) | 8.23E-01 | Sun      |
| CASP3    | 0.99 (0.92, 1.07) | 8.24E-01 | Suhre    |
| ENPP5    | 1.00 (0.97, 1.02) | 8.24E-01 | Sun      |
| PDGFD    | 1.01 (0.94, 1.08) | 8.24E-01 | Sun      |
| RECQL    | 0.99 (0.94, 1.05) | 8.24E-01 | Emilsson |
| PPT1     | 1.00 (0.96, 1.05) | 8.25E-01 | Sun      |
| MATN4    | 1.01 (0.92, 1.11) | 8.26E-01 | Sun      |
| PCSK1    | 1.00 (0.98, 1.02) | 8.26E-01 | Sun      |
| IGF2R    | 1.00 (0.97, 1.04) | 8.27E-01 | Sun      |
| GRAMD1C  | 1.00 (0.97, 1.03) | 8.29E-01 | Sun      |
| FCRL4    | 1.00 (0.98, 1.02) | 8.32E-01 | Sun      |
| BPIFB1   | 1.00 (0.95, 1.04) | 8.33E-01 | Sun      |
| CD300E   | 1.01 (0.94, 1.08) | 8.33E-01 | Emilsson |
| DSG2     | 1.01 (0.91, 1.13) | 8.33E-01 | Sun      |
| SNCA     | 1.01 (0.92, 1.11) | 8.33E-01 | Sun      |
| LAG3     | 0.99 (0.87, 1.12) | 8.35E-01 | Emilsson |
| SCARF1   | 1.00 (0.97, 1.04) | 8.36E-01 | Suhre    |
| ACE      | 1.00 (0.97, 1.04) | 8.40E-01 | Emilsson |
| EBI3     | 1.00 (0.98, 1.02) | 8.41E-01 | Emilsson |
| PGLYRP2  | 1.00 (0.95, 1.04) | 8.43E-01 | Emilsson |
| ACHE     | 1.01 (0.95, 1.07) | 8.48E-01 | Emilsson |
| H6PD     | 1.00 (0.96, 1.03) | 8.49E-01 | Sun      |
| CD5L     | 1.01 (0.94, 1.08) | 8.51E-01 | Yao      |
| MANF     | 1.01 (0.94, 1.07) | 8.54E-01 | Emilsson |
| ASPH     | 0.99 (0.89, 1.10) | 8.56E-01 | Sun      |

|         |                   |          |          |
|---------|-------------------|----------|----------|
| FMOD    | 1.01 (0.88, 1.17) | 8.58E-01 | Emilsson |
| B3GALT6 | 0.99 (0.89, 1.10) | 8.62E-01 | Emilsson |
| PAM     | 1.00 (0.96, 1.04) | 8.62E-01 | Sun      |
| NMRAL1  | 0.99 (0.94, 1.06) | 8.64E-01 | Sun      |
| B4GALT6 | 1.00 (0.96, 1.04) | 8.70E-01 | Emilsson |
| CPB2    | 1.00 (0.98, 1.02) | 8.70E-01 | Suhre    |
| FN1     | 1.00 (0.97, 1.03) | 8.70E-01 | Suhre    |
| CNTNAP2 | 1.00 (0.96, 1.05) | 8.75E-01 | Sun      |
| LECT2   | 1.00 (0.95, 1.07) | 8.76E-01 | Emilsson |
| S100A7  | 1.00 (0.97, 1.04) | 8.80E-01 | Emilsson |
| CRTAC1  | 1.00 (0.95, 1.06) | 8.81E-01 | Emilsson |
| NUDT12  | 1.01 (0.94, 1.08) | 8.81E-01 | Sun      |
| GNMT    | 1.00 (0.96, 1.05) | 8.82E-01 | Emilsson |
| IL18RAP | 1.00 (0.96, 1.04) | 8.86E-01 | Suhre    |
| PCDH9   | 0.99 (0.90, 1.10) | 8.87E-01 | Emilsson |
| HPSE    | 1.00 (0.96, 1.05) | 8.88E-01 | Emilsson |
| ERAP2   | 1.00 (0.98, 1.02) | 8.90E-01 | Sun      |
| IL1R1   | 0.99 (0.88, 1.12) | 8.90E-01 | Emilsson |
| SWAP70  | 1.01 (0.93, 1.08) | 8.90E-01 | Sun      |
| NMB     | 0.99 (0.88, 1.12) | 8.92E-01 | Emilsson |
| RNASE6  | 1.00 (0.98, 1.02) | 8.92E-01 | Sun      |
| ACP5    | 1.00 (0.95, 1.06) | 8.95E-01 | Sun      |
| WFDC1   | 1.00 (0.95, 1.06) | 8.95E-01 | Emilsson |
| CD7     | 1.00 (0.95, 1.04) | 8.98E-01 | Emilsson |
| CHST9   | 1.00 (0.95, 1.07) | 8.98E-01 | Sun      |
| LILRA6  | 1.00 (0.97, 1.03) | 9.01E-01 | Sun      |
| TGFBI   | 1.00 (0.96, 1.04) | 9.01E-01 | Sun      |
| CLN5    | 1.01 (0.86, 1.19) | 9.07E-01 | Emilsson |
| TMEM190 | 1.00 (0.98, 1.02) | 9.07E-01 | Sun      |
| ART3    | 1.00 (0.93, 1.06) | 9.09E-01 | Sun      |
| LGALS2  | 1.00 (0.93, 1.07) | 9.12E-01 | Sun      |
| C1QTNF3 | 1.01 (0.88, 1.15) | 9.14E-01 | Emilsson |
| FLRT2   | 0.99 (0.91, 1.09) | 9.15E-01 | Sun      |
| OSCAR   | 1.01 (0.88, 1.15) | 9.17E-01 | Emilsson |
| C7      | 1.00 (0.95, 1.05) | 9.20E-01 | Suhre    |
| LILRB1  | 1.00 (0.98, 1.02) | 9.21E-01 | Sun      |
| CTRB1   | 1.00 (0.96, 1.04) | 9.28E-01 | Sun      |
| FCN1    | 1.00 (0.96, 1.03) | 9.30E-01 | Sun      |
| APOA5   | 1.00 (0.91, 1.11) | 9.36E-01 | Sun      |
| PPIE    | 1.00 (0.95, 1.05) | 9.37E-01 | Sun      |
| PPIL1   | 1.00 (0.95, 1.05) | 9.44E-01 | Sun      |
| LPA     | 1.00 (0.97, 1.03) | 9.46E-01 | Yao      |
| ICAM5   | 1.00 (0.98, 1.02) | 9.47E-01 | Sun      |
| CD300C  | 1.00 (0.92, 1.08) | 9.48E-01 | Sun      |
| CCL25   | 1.00 (0.96, 1.04) | 9.50E-01 | Sun      |
| FKBP7   | 1.00 (0.94, 1.07) | 9.52E-01 | Emilsson |
| RGMA    | 1.00 (0.90, 1.10) | 9.53E-01 | Sun      |
| MIA     | 1.00 (0.98, 1.02) | 9.55E-01 | Sun      |
| TYMP    | 1.00 (0.88, 1.14) | 9.57E-01 | Emilsson |
| CFH     | 1.00 (0.95, 1.05) | 9.58E-01 | Sun      |
| SIGLEC7 | 1.00 (0.93, 1.08) | 9.60E-01 | Sun      |
| QSOX1   | 1.00 (0.95, 1.05) | 9.61E-01 | Sun      |
| FCN2    | 1.00 (0.96, 1.04) | 9.62E-01 | Sun      |
| BST1    | 1.00 (0.98, 1.02) | 9.63E-01 | Sun      |

|           |                   |          |          |
|-----------|-------------------|----------|----------|
| LYVE1     | 1.00 (0.90, 1.11) | 9.64E-01 | Emilsson |
| IL23R     | 1.00 (0.91, 1.10) | 9.65E-01 | Sun      |
| MAN2B2    | 1.00 (0.94, 1.06) | 9.66E-01 | Sun      |
| NEGR1     | 1.00 (0.88, 1.13) | 9.66E-01 | Emilsson |
| NUDT9     | 1.00 (0.92, 1.08) | 9.66E-01 | Sun      |
| TIMP2     | 1.00 (0.94, 1.07) | 9.67E-01 | Emilsson |
| SCUBE1    | 1.00 (0.91, 1.10) | 9.69E-01 | Emilsson |
| ADH5      | 1.00 (0.93, 1.07) | 9.70E-01 | Emilsson |
| CST5      | 1.00 (0.97, 1.03) | 9.72E-01 | Suhre    |
| IFNLR1    | 1.00 (0.89, 1.12) | 9.72E-01 | Emilsson |
| LSAMP     | 1.00 (0.90, 1.10) | 9.72E-01 | Emilsson |
| SCG3      | 1.00 (0.95, 1.05) | 9.73E-01 | Sun      |
| GSN       | 1.00 (0.86, 1.17) | 9.74E-01 | Emilsson |
| ADAM22    | 1.00 (0.90, 1.11) | 9.75E-01 | Emilsson |
| DKK1      | 1.00 (0.90, 1.11) | 9.76E-01 | Sun      |
| LRPAP1    | 1.00 (0.91, 1.10) | 9.77E-01 | Sun      |
| OSMR      | 1.00 (0.91, 1.11) | 9.78E-01 | Sun      |
| CFHR4     | 1.00 (0.97, 1.03) | 9.85E-01 | Emilsson |
| IL6ST     | 1.00 (0.92, 1.08) | 9.85E-01 | Sun      |
| PRSS57    | 1.00 (0.97, 1.03) | 9.85E-01 | Emilsson |
| TNFRSF11A | 1.00 (0.91, 1.10) | 9.85E-01 | Sun      |
| TEPSIN    | 1.00 (0.94, 1.06) | 9.88E-01 | Sun      |
| SEMA4D    | 1.00 (0.98, 1.02) | 9.90E-01 | Emilsson |
| CCL16     | 1.00 (0.98, 1.02) | 9.91E-01 | Sun      |
| SIRPG     | 1.00 (0.93, 1.08) | 9.92E-01 | Sun      |
| IL18R1    | 1.00 (0.98, 1.02) | 9.93E-01 | Sun      |
| POGLUT1   | 1.00 (0.91, 1.10) | 9.96E-01 | Sun      |
| POFUT1    | 1.00 (0.93, 1.07) | 1.00E+00 | Sun      |

---

**Supplementary Table S5** MR results for the external validation

| <b>Protein</b> | <b>OR (95% CI)</b> | <b>P value</b> |
|----------------|--------------------|----------------|
| TIMP4          | 1.17 (1.10, 1.24)  | 1.49E-07       |
| ITGA2          | 0.68 (0.55, 0.84)  | 4.40E-04       |
| P4HB           | 1.55 (1.21, 1.99)  | 4.92E-04       |
| MMP12          | 0.94 (0.91, 0.98)  | 9.07E-04       |
| LYPLAL1        | 1.37 (1.14, 1.66)  | 9.72E-04       |
| LAMC2          | 0.95 (0.91, 0.98)  | 1.06E-03       |
| MMP19          | 1.35 (1.13, 1.61)  | 1.12E-03       |
| GSTT1          | 1.06 (1.02, 1.09)  | 1.38E-03       |
| ANGPTL3        | 0.87 (0.80, 0.95)  | 1.59E-03       |
| CST6           | 1.40 (1.13, 1.72)  | 1.59E-03       |
| DPP7           | 0.93 (0.89, 0.97)  | 1.62E-03       |
| SERPINA1       | 0.92 (0.87, 0.97)  | 1.69E-03       |
| DUT            | 0.60 (0.43, 0.83)  | 1.90E-03       |
| RNASET2        | 1.12 (1.04, 1.20)  | 2.47E-03       |
| GCKR           | 1.38 (1.11, 1.70)  | 2.99E-03       |
| CCS            | 1.28 (1.08, 1.52)  | 4.34E-03       |
| LILRA3         | 0.68 (0.52, 0.89)  | 4.73E-03       |
| RNASE1         | 1.15 (1.04, 1.26)  | 6.75E-03       |
| PAICS          | 0.74 (0.59, 0.92)  | 6.89E-03       |
| CNTNAP2        | 0.79 (0.67, 0.94)  | 7.50E-03       |
| VNN2           | 1.11 (1.03, 1.21)  | 7.97E-03       |
| TCEA2          | 1.21 (1.05, 1.39)  | 8.20E-03       |
| HS6ST3         | 1.29 (1.07, 1.55)  | 8.66E-03       |
| ECM1           | 0.96 (0.94, 0.99)  | 8.77E-03       |
| SHBG           | 0.86 (0.77, 0.96)  | 9.10E-03       |
| CDHR5          | 0.64 (0.45, 0.90)  | 9.59E-03       |
| LHB            | 1.10 (1.02, 1.19)  | 9.66E-03       |
| DKK3           | 1.08 (1.02, 1.15)  | 1.00E-02       |
| SNPH           | 1.49 (1.10, 2.02)  | 1.05E-02       |
| CD177          | 1.09 (1.02, 1.16)  | 1.08E-02       |
| AKR1A1         | 0.95 (0.91, 0.99)  | 1.15E-02       |
| PRTN3          | 1.06 (1.01, 1.12)  | 1.29E-02       |
| IL6R           | 1.02 (1.01, 1.04)  | 1.30E-02       |
| CD68           | 1.59 (1.10, 2.29)  | 1.34E-02       |
| PDGFRL         | 0.92 (0.87, 0.98)  | 1.41E-02       |
| WFIKKN1        | 1.19 (1.04, 1.37)  | 1.41E-02       |
| SCGB3A1        | 1.25 (1.04, 1.49)  | 1.46E-02       |
| CRHBP          | 1.13 (1.02, 1.25)  | 1.55E-02       |
| DPEP1          | 1.05 (1.01, 1.09)  | 1.55E-02       |
| LRRC15         | 1.08 (1.01, 1.14)  | 1.62E-02       |
| EPHA2          | 0.85 (0.74, 0.97)  | 1.70E-02       |
| GUK1           | 0.88 (0.79, 0.98)  | 1.71E-02       |
| BPNT1          | 1.54 (1.08, 2.21)  | 1.85E-02       |
| CAPN2          | 0.80 (0.66, 0.96)  | 1.91E-02       |
| MAPK9          | 1.17 (1.03, 1.34)  | 1.91E-02       |
| HK2            | 0.67 (0.48, 0.94)  | 2.03E-02       |
| IL1RN          | 1.14 (1.02, 1.27)  | 2.05E-02       |
| MIF            | 0.72 (0.55, 0.95)  | 2.05E-02       |
| VPS26A         | 0.87 (0.78, 0.98)  | 2.05E-02       |
| SEMA4A         | 0.87 (0.78, 0.98)  | 2.13E-02       |
| ENO3           | 0.93 (0.88, 0.99)  | 2.16E-02       |
| NAAA           | 0.92 (0.86, 0.99)  | 2.17E-02       |

|          |                   |          |
|----------|-------------------|----------|
| WIF1     | 1.44 (1.05, 1.96) | 2.17E-02 |
| MASP1    | 1.48 (1.06, 2.07) | 2.25E-02 |
| CASS4    | 0.65 (0.45, 0.94) | 2.30E-02 |
| ARHGAP25 | 1.17 (1.02, 1.34) | 2.42E-02 |
| HP       | 1.04 (1.00, 1.07) | 2.46E-02 |
| CRNN     | 0.84 (0.71, 0.98) | 2.60E-02 |
| PDGFRB   | 1.02 (1.00, 1.03) | 2.65E-02 |
| ANXA11   | 0.87 (0.77, 0.98) | 2.77E-02 |
| RCL      | 1.21 (1.02, 1.44) | 2.84E-02 |
| CSF2RB   | 1.04 (1.00, 1.08) | 2.85E-02 |
| WFDC5    | 1.46 (1.04, 2.06) | 2.92E-02 |
| KREMEN1  | 1.12 (1.01, 1.24) | 2.98E-02 |
| NAGK     | 0.88 (0.78, 0.99) | 3.01E-02 |
| CTSH     | 1.07 (1.01, 1.14) | 3.09E-02 |
| THYN1    | 0.66 (0.45, 0.96) | 3.13E-01 |
| LAP3     | 0.69 (0.49, 0.97) | 3.17E-02 |
| C10orf54 | 1.06 (1.01, 1.13) | 3.19E-02 |
| NADK     | 0.84 (0.72, 0.99) | 3.21E-02 |
| VIT      | 1.06 (1.00, 1.11) | 3.26E-02 |
| NME4     | 1.23 (1.02, 1.50) | 3.31E-02 |
| PDCD6IP  | 1.22 (1.02, 1.47) | 3.36E-02 |
| LTBP4    | 1.46 (1.03, 2.06) | 3.48E-02 |
| PLAU     | 1.18 (1.01, 1.37) | 3.50E-02 |
| LILRA6   | 0.93 (0.87, 0.99) | 3.52E-02 |
| MAPRE1   | 1.37 (1.01, 1.84) | 4.07E-02 |
| HAVCR1   | 0.94 (0.89, 1.00) | 4.09E-02 |
| GAS6     | 0.93 (0.86, 1.00) | 4.13E-02 |
| CD72     | 1.23 (1.01, 1.49) | 4.14E-02 |
| ITLN1    | 0.77 (0.60, 0.99) | 4.14E-02 |
| TBCB     | 0.76 (0.58, 0.99) | 4.16E-02 |
| FSTL1    | 0.88 (0.77, 1.00) | 4.22E-02 |
| COLGALT1 | 0.86 (0.74, 1.00) | 4.44E-02 |
| IGFBP7   | 0.93 (0.87, 1.00) | 4.45E-02 |
| ESM1     | 1.15 (1.00, 1.32) | 4.51E-02 |
| SIGLEC6  | 1.07 (1.00, 1.14) | 4.55E-02 |
| UNC5D    | 1.21 (1.00, 1.45) | 4.55E-02 |
| C4BPA    | 1.19 (1.00, 1.41) | 4.72E-02 |
| HSP90B1  | 0.97 (0.95, 1.00) | 4.88E-02 |
| ESAM     | 0.88 (0.77, 1.00) | 4.98E-02 |
| CFI      | 1.10 (1.00, 1.21) | 5.14E-02 |
| SEMA3E   | 0.97 (0.95, 1.00) | 5.21E-02 |
| POLM     | 0.93 (0.86, 1.00) | 5.22E-02 |
| AES      | 1.52 (0.99, 2.32) | 5.30E-02 |
| VASN     | 0.77 (0.59, 1.00) | 5.30E-02 |
| KLK12    | 0.87 (0.76, 1.00) | 5.39E-02 |
| SPARCL1  | 1.03 (1.00, 1.07) | 5.39E-02 |
| NANS     | 1.29 (1.00, 1.67) | 5.43E-02 |
| LZIC     | 0.69 (0.48, 1.01) | 5.48E-02 |
| CREB3L4  | 0.91 (0.83, 1.00) | 5.69E-02 |
| CD58     | 0.91 (0.83, 1.00) | 5.74E-02 |
| SLITRK3  | 0.93 (0.87, 1.00) | 5.89E-02 |
| AGRN     | 1.08 (1.00, 1.17) | 5.94E-02 |
| IGSF3    | 0.80 (0.63, 1.01) | 5.99E-02 |
| TSTD1    | 1.05 (1.00, 1.12) | 6.04E-02 |

|           |                   |          |
|-----------|-------------------|----------|
| NPW       | 0.96 (0.92, 1.00) | 6.06E-02 |
| DCXR      | 0.81 (0.65, 1.01) | 6.31E-02 |
| PATE4     | 1.16 (0.99, 1.35) | 6.37E-02 |
| ETFA      | 1.36 (0.98, 1.89) | 6.38E-02 |
| C9        | 1.34 (0.98, 1.83) | 6.39E-02 |
| CHGB      | 1.17 (0.99, 1.39) | 6.47E-02 |
| RSPO1     | 1.10 (0.99, 1.21) | 6.50E-02 |
| IDH1      | 1.12 (0.99, 1.26) | 6.54E-02 |
| PTPRU     | 0.81 (0.65, 1.01) | 6.55E-02 |
| NDE1      | 0.78 (0.60, 1.02) | 6.56E-02 |
| PSME2     | 1.27 (0.98, 1.63) | 6.65E-02 |
| BPHL      | 0.83 (0.69, 1.01) | 6.69E-02 |
| PSME1     | 1.38 (0.98, 1.94) | 6.75E-02 |
| LILRA5    | 0.80 (0.63, 1.02) | 6.78E-02 |
| PLEK      | 0.84 (0.70, 1.01) | 6.86E-02 |
| TLR1      | 0.85 (0.71, 1.01) | 6.89E-02 |
| UROD      | 1.07 (0.99, 1.16) | 6.89E-02 |
| PIP       | 0.96 (0.92, 1.00) | 6.91E-02 |
| PCYOX1    | 0.97 (0.93, 1.00) | 7.04E-02 |
| KIAA1467  | 0.90 (0.81, 1.01) | 7.21E-02 |
| PIGR      | 0.89 (0.78, 1.01) | 7.22E-02 |
| TNC       | 1.02 (1.00, 1.04) | 7.24E-02 |
| DEFA5     | 1.32 (0.97, 1.80) | 7.25E-02 |
| CDH5      | 0.88 (0.77, 1.01) | 7.34E-02 |
| IL22RA2   | 0.85 (0.71, 1.02) | 7.35E-02 |
| KIAA1549L | 0.94 (0.89, 1.01) | 7.40E-02 |
| MDGA2     | 1.05 (0.99, 1.11) | 7.60E-02 |
| PRSS8     | 1.29 (0.97, 1.72) | 7.93E-02 |
| FAS       | 0.93 (0.86, 1.01) | 8.01E-02 |
| SMAD1     | 1.40 (0.96, 2.04) | 8.01E-02 |
| CHAD      | 1.35 (0.96, 1.88) | 8.10E-02 |
| FAM151A   | 1.05 (0.99, 1.12) | 8.28E-02 |
| PPP1R14A  | 1.09 (0.99, 1.21) | 8.40E-02 |
| SPINT2    | 1.03 (1.00, 1.06) | 8.40E-02 |
| LAYN      | 0.71 (0.49, 1.05) | 8.46E-02 |
| NME2      | 1.11 (0.99, 1.26) | 8.46E-02 |
| CLEC11A   | 1.06 (0.99, 1.12) | 8.52E-02 |
| ENPEP     | 0.96 (0.91, 1.01) | 8.54E-02 |
| GRN       | 1.08 (0.99, 1.18) | 8.73E-02 |
| OVCA2     | 1.13 (0.98, 1.30) | 8.81E-02 |
| B4GALT2   | 1.34 (0.96, 1.87) | 8.89E-02 |
| MBL2      | 0.96 (0.91, 1.01) | 8.97E-02 |
| IL17RD    | 1.07 (0.99, 1.17) | 8.99E-02 |
| BDH2      | 0.92 (0.84, 1.01) | 9.01E-02 |
| INHBB     | 0.76 (0.55, 1.05) | 9.21E-02 |
| OXT       | 0.95 (0.89, 1.01) | 9.68E-02 |
| DPY30     | 0.75 (0.54, 1.05) | 9.83E-02 |
| C6        | 0.75 (0.53, 1.06) | 1.00E-01 |
| MCEE      | 1.32 (0.95, 1.84) | 1.01E-01 |
| SPINK2    | 1.07 (0.99, 1.17) | 1.03E-01 |
| CPLX1     | 1.31 (0.95, 1.81) | 1.04E-01 |
| MMAB      | 1.41 (0.93, 2.15) | 1.04E-01 |
| MAPK3     | 1.22 (0.96, 1.54) | 1.06E-01 |
| POSTN     | 0.91 (0.81, 1.02) | 1.06E-01 |



|          |                   |          |
|----------|-------------------|----------|
| PTK7     | 0.83 (0.65, 1.04) | 1.07E-01 |
| GGPS1    | 0.82 (0.64, 1.05) | 1.08E-01 |
| HOMER2   | 0.79 (0.59, 1.05) | 1.09E-01 |
| RARRES2  | 0.93 (0.86, 1.02) | 1.10E-01 |
| ARF4     | 1.19 (0.96, 1.49) | 1.13E-01 |
| CNRIP1   | 0.97 (0.93, 1.01) | 1.14E-01 |
| DLL1     | 1.16 (0.96, 1.40) | 1.14E-01 |
| NRK1     | 1.11 (0.98, 1.25) | 1.14E-01 |
| FBLN1    | 0.90 (0.78, 1.03) | 1.15E-01 |
| LILRA2   | 1.09 (0.98, 1.22) | 1.15E-01 |
| APP      | 1.21 (0.95, 1.55) | 1.17E-01 |
| ISG15    | 0.95 (0.90, 1.01) | 1.17E-01 |
| PNLIPRP1 | 0.90 (0.79, 1.03) | 1.17E-01 |
| PTHLH    | 1.15 (0.97, 1.37) | 1.17E-01 |
| COL2A1   | 0.98 (0.95, 1.01) | 1.18E-01 |
| UGT1A6   | 1.16 (0.96, 1.39) | 1.20E-01 |
| APOF     | 0.92 (0.83, 1.02) | 1.21E-01 |
| PFKM     | 1.10 (0.98, 1.23) | 1.21E-01 |
| SRA1     | 1.13 (0.97, 1.32) | 1.21E-01 |
| C1QL1    | 1.20 (0.95, 1.52) | 1.22E-01 |
| FAM171B  | 0.90 (0.78, 1.03) | 1.25E-01 |
| FKBP2    | 0.72 (0.47, 1.10) | 1.25E-01 |
| SERPINB5 | 1.12 (0.97, 1.29) | 1.25E-01 |
| CA6      | 1.04 (0.99, 1.09) | 1.28E-01 |
| CCDC134  | 1.16 (0.96, 1.41) | 1.30E-01 |
| ICAM4    | 0.85 (0.69, 1.05) | 1.31E-01 |
| TPSB2    | 1.04 (0.99, 1.09) | 1.31E-01 |
| ACP1     | 1.01 (1.00, 1.03) | 1.34E-01 |
| NIT2     | 1.20 (0.95, 1.51) | 1.34E-01 |
| EDIL3    | 0.78 (0.57, 1.08) | 1.35E-01 |
| ITIH1    | 0.97 (0.94, 1.01) | 1.35E-01 |
| NUDCD3   | 1.24 (0.94, 1.63) | 1.35E-01 |
| SERPINF2 | 1.11 (0.97, 1.27) | 1.37E-01 |
| CNN1     | 1.28 (0.92, 1.79) | 1.38E-01 |
| IL1RL1   | 0.97 (0.93, 1.01) | 1.38E-01 |
| RAB6B    | 0.93 (0.84, 1.02) | 1.38E-01 |
| AGT      | 1.08 (0.98, 1.18) | 1.39E-01 |
| CRTAM    | 1.05 (0.99, 1.11) | 1.39E-01 |
| BPI      | 1.04 (0.99, 1.10) | 1.40E-01 |
| SERPINB8 | 0.92 (0.82, 1.03) | 1.40E-01 |
| RSPO4    | 1.32 (0.91, 1.91) | 1.41E-01 |
| TIE1     | 0.92 (0.82, 1.03) | 1.41E-01 |
| MIA      | 1.26 (0.92, 1.73) | 1.42E-01 |
| SEMA5A   | 0.74 (0.50, 1.11) | 1.43E-01 |
| B4GALT1  | 1.08 (0.97, 1.20) | 1.45E-01 |
| CD109    | 0.97 (0.94, 1.01) | 1.45E-01 |
| LRIG3    | 1.06 (0.98, 1.13) | 1.46E-01 |
| FCRL6    | 1.12 (0.96, 1.31) | 1.47E-01 |
| NTN4     | 0.93 (0.84, 1.03) | 1.47E-01 |
| EGLN1    | 0.79 (0.57, 1.09) | 1.48E-01 |
| HGD      | 1.14 (0.96, 1.35) | 1.49E-01 |
| MMP13    | 1.28 (0.92, 1.78) | 1.50E-01 |
| RBP1     | 0.82 (0.63, 1.07) | 1.50E-01 |
| OSMR     | 1.11 (0.96, 1.29) | 1.51E-01 |

|          |                   |          |
|----------|-------------------|----------|
| SH3BP2   | 0.95 (0.88, 1.02) | 1.52E-01 |
| VEGFA    | 1.02 (0.99, 1.06) | 1.53E-01 |
| MAN1C1   | 0.93 (0.84, 1.03) | 1.54E-01 |
| TAGLN    | 1.17 (0.94, 1.45) | 1.54E-01 |
| ARHGEF25 | 0.89 (0.75, 1.05) | 1.55E-01 |
| OAF      | 1.15 (0.95, 1.40) | 1.55E-01 |
| PGLS     | 1.17 (0.94, 1.45) | 1.55E-01 |
| CINP     | 0.77 (0.54, 1.10) | 1.56E-01 |
| IL12RB1  | 1.19 (0.93, 1.53) | 1.56E-01 |
| NUCB1    | 1.12 (0.96, 1.30) | 1.56E-01 |
| LCT      | 1.01 (0.99, 1.03) | 1.58E-01 |
| NUDT12   | 0.87 (0.72, 1.06) | 1.59E-01 |
| OBP2B    | 0.96 (0.91, 1.02) | 1.59E-01 |
| SFTPB    | 1.04 (0.99, 1.09) | 1.59E-01 |
| TYRO3    | 0.89 (0.75, 1.05) | 1.59E-01 |
| TPSAB1   | 0.97 (0.93, 1.01) | 1.61E-01 |
| NDST1    | 1.11 (0.96, 1.27) | 1.63E-01 |
| PSAP     | 1.05 (0.98, 1.12) | 1.63E-01 |
| F10      | 1.15 (0.94, 1.41) | 1.64E-01 |
| CCL18    | 1.02 (0.99, 1.05) | 1.65E-01 |
| PMM2     | 0.92 (0.82, 1.04) | 1.65E-01 |
| PGM2     | 0.84 (0.65, 1.08) | 1.66E-01 |
| GPCPD1   | 0.83 (0.63, 1.09) | 1.70E-01 |
| CYB5R2   | 0.91 (0.80, 1.04) | 1.71E-01 |
| CXCL10   | 0.85 (0.68, 1.07) | 1.77E-01 |
| MANSC1   | 1.05 (0.98, 1.14) | 1.80E-01 |
| KLC1     | 0.87 (0.71, 1.07) | 1.81E-01 |
| NOTUM    | 1.18 (0.93, 1.51) | 1.81E-01 |
| ATRN     | 0.95 (0.87, 1.03) | 1.83E-01 |
| GSTP1    | 0.91 (0.79, 1.05) | 1.84E-01 |
| LGMN     | 1.10 (0.95, 1.28) | 1.86E-01 |
| TPI1     | 1.26 (0.89, 1.78) | 1.86E-01 |
| AKR1B1   | 0.85 (0.68, 1.08) | 1.90E-01 |
| CLINT1   | 1.28 (0.88, 1.85) | 1.90E-01 |
| DNAJB12  | 1.17 (0.93, 1.47) | 1.92E-01 |
| SPINK7   | 1.11 (0.95, 1.30) | 1.93E-01 |
| THBS2    | 0.94 (0.85, 1.03) | 1.93E-01 |
| GSTZ1    | 0.99 (0.97, 1.01) | 1.94E-01 |
| PPIC     | 1.03 (0.98, 1.08) | 1.94E-01 |
| CHRDL2   | 0.86 (0.68, 1.08) | 1.95E-01 |
| RPE      | 0.86 (0.68, 1.08) | 1.98E-01 |
| TEC      | 0.90 (0.76, 1.06) | 1.98E-01 |
| TFF2     | 1.15 (0.93, 1.41) | 1.99E-01 |
| GFRA1    | 1.07 (0.96, 1.19) | 2.00E-01 |
| CFL2     | 1.12 (0.94, 1.33) | 2.01E-01 |
| IL1RL2   | 0.93 (0.83, 1.04) | 2.02E-01 |
| SIRPB1   | 0.98 (0.96, 1.01) | 2.03E-01 |
| TREML2   | 0.97 (0.94, 1.01) | 2.04E-01 |
| CA8      | 1.03 (0.98, 1.08) | 2.05E-01 |
| APOA1BP  | 0.94 (0.85, 1.03) | 2.07E-01 |
| CDON     | 0.97 (0.93, 1.02) | 2.10E-01 |
| CST3     | 0.95 (0.87, 1.03) | 2.10E-01 |
| NID2     | 1.02 (0.99, 1.06) | 2.10E-01 |
| FAM19A5  | 0.77 (0.51, 1.16) | 2.13E-01 |

|         |                   |          |
|---------|-------------------|----------|
| C1QTNF9 | 0.94 (0.84, 1.04) | 2.14E-01 |
| ECH1    | 0.96 (0.90, 1.02) | 2.14E-01 |
| MFGE8   | 0.95 (0.88, 1.03) | 2.15E-01 |
| MYOM2   | 1.26 (0.87, 1.82) | 2.16E-01 |
| ADGRE2  | 1.04 (0.98, 1.10) | 2.18E-01 |
| CNTN1   | 0.95 (0.88, 1.03) | 2.19E-01 |
| ENTPD5  | 1.03 (0.98, 1.07) | 2.21E-01 |
| BCAN    | 1.07 (0.96, 1.18) | 2.22E-01 |
| GDF15   | 0.97 (0.93, 1.02) | 2.22E-01 |
| HBZ     | 1.02 (0.99, 1.04) | 2.22E-01 |
| PARK7   | 0.88 (0.71, 1.08) | 2.22E-01 |
| SPINK6  | 0.96 (0.89, 1.03) | 2.22E-01 |
| EPHA5   | 1.21 (0.89, 1.65) | 2.23E-01 |
| FGG     | 0.93 (0.82, 1.05) | 2.23E-01 |
| ISLR2   | 0.95 (0.87, 1.03) | 2.25E-01 |
| RAB31   | 1.10 (0.94, 1.28) | 2.29E-01 |
| ZADH2   | 1.13 (0.92, 1.39) | 2.29E-01 |
| IL16    | 1.02 (0.99, 1.06) | 2.30E-01 |
| BDNF    | 0.85 (0.65, 1.11) | 2.31E-01 |
| CRELD1  | 0.97 (0.92, 1.02) | 2.32E-01 |
| CXCL1   | 0.98 (0.95, 1.01) | 2.33E-01 |
| HTRA1   | 1.13 (0.92, 1.39) | 2.34E-01 |
| ALDH3A1 | 0.91 (0.78, 1.06) | 2.35E-01 |
| ANGPT1  | 0.90 (0.75, 1.07) | 2.36E-01 |
| LRP12   | 0.81 (0.57, 1.15) | 2.36E-01 |
| PLXNC1  | 0.96 (0.90, 1.03) | 2.36E-01 |
| GPC5    | 1.13 (0.92, 1.39) | 2.38E-01 |
| TPP1    | 1.09 (0.94, 1.26) | 2.39E-01 |
| EGF     | 1.12 (0.92, 1.36) | 2.41E-01 |
| INHBC   | 0.83 (0.61, 1.13) | 2.42E-01 |
| CDCP1   | 0.95 (0.88, 1.03) | 2.43E-01 |
| SPATA20 | 1.04 (0.97, 1.11) | 2.44E-01 |
| IGSF8   | 0.93 (0.81, 1.05) | 2.45E-01 |
| ANTXR2  | 1.07 (0.96, 1.19) | 2.47E-01 |
| IMPAD1  | 1.09 (0.94, 1.28) | 2.50E-01 |
| FAM49B  | 1.24 (0.86, 1.79) | 2.51E-01 |
| NETO1   | 0.83 (0.60, 1.14) | 2.51E-01 |
| UBXN2B  | 1.20 (0.88, 1.64) | 2.52E-01 |
| CST4    | 0.95 (0.88, 1.04) | 2.54E-01 |
| GNLY    | 0.95 (0.88, 1.04) | 2.54E-01 |
| FUT8    | 0.99 (0.96, 1.01) | 2.55E-01 |
| KL      | 0.93 (0.83, 1.05) | 2.55E-01 |
| PLA2R1  | 0.99 (0.96, 1.01) | 2.55E-01 |
| CNDP1   | 0.96 (0.90, 1.03) | 2.56E-01 |
| TNFSF12 | 0.97 (0.92, 1.02) | 2.58E-01 |
| ALKBH3  | 1.05 (0.97, 1.14) | 2.59E-01 |
| EPHB1   | 1.04 (0.97, 1.11) | 2.59E-01 |
| SCARF2  | 1.09 (0.94, 1.26) | 2.60E-01 |
| TAPBPL  | 1.01 (0.99, 1.03) | 2.63E-01 |
| CCL23   | 0.96 (0.90, 1.03) | 2.64E-01 |
| RGMB    | 0.93 (0.81, 1.06) | 2.64E-01 |
| GSTO1   | 0.99 (0.96, 1.01) | 2.65E-01 |
| MSR1    | 0.91 (0.78, 1.07) | 2.65E-01 |
| GLIPR2  | 1.04 (0.97, 1.12) | 2.66E-01 |

|          |                   |          |
|----------|-------------------|----------|
| PTEN     | 1.39 (0.78, 2.47) | 2.66E-01 |
| LIPN     | 1.02 (0.99, 1.04) | 2.70E-01 |
| ADAM23   | 1.03 (0.98, 1.09) | 2.74E-01 |
| CFD      | 0.90 (0.73, 1.09) | 2.74E-01 |
| CD48     | 0.95 (0.86, 1.05) | 2.76E-01 |
| PLEKHA7  | 0.97 (0.93, 1.02) | 2.76E-01 |
| ANXA5    | 1.08 (0.94, 1.24) | 2.77E-01 |
| NLGN1    | 0.92 (0.78, 1.07) | 2.77E-01 |
| CFHR3    | 1.10 (0.93, 1.30) | 2.79E-01 |
| DLK1     | 0.98 (0.94, 1.02) | 2.79E-01 |
| TNR      | 1.08 (0.94, 1.25) | 2.79E-01 |
| HSPB1    | 1.07 (0.94, 1.22) | 2.80E-01 |
| POR      | 1.07 (0.95, 1.20) | 2.80E-01 |
| CSRP1    | 1.12 (0.91, 1.37) | 2.81E-01 |
| ARG1     | 0.89 (0.72, 1.10) | 2.82E-01 |
| COCH     | 1.04 (0.97, 1.11) | 2.82E-01 |
| COL9A1   | 1.17 (0.88, 1.57) | 2.82E-01 |
| FOXO3    | 0.81 (0.55, 1.19) | 2.82E-01 |
| B3GNT8   | 0.99 (0.97, 1.01) | 2.83E-01 |
| ADGRF5   | 0.94 (0.85, 1.05) | 2.84E-01 |
| CD59     | 0.94 (0.85, 1.05) | 2.84E-01 |
| METAP1   | 0.84 (0.61, 1.15) | 2.84E-01 |
| PRSS27   | 1.06 (0.95, 1.19) | 2.84E-01 |
| SERPINF1 | 0.96 (0.90, 1.03) | 2.84E-01 |
| EDAR     | 1.05 (0.96, 1.13) | 2.85E-01 |
| IBSP     | 0.89 (0.73, 1.10) | 2.87E-01 |
| FLII     | 0.89 (0.73, 1.10) | 2.89E-01 |
| SLAMF7   | 1.01 (0.99, 1.04) | 2.89E-01 |
| FBLN5    | 1.15 (0.88, 1.51) | 2.91E-01 |
| GIF      | 1.06 (0.95, 1.18) | 2.91E-01 |
| TCN2     | 1.03 (0.98, 1.09) | 2.92E-01 |
| APOB     | 0.87 (0.67, 1.13) | 2.94E-01 |
| SAA1     | 1.02 (0.98, 1.07) | 2.95E-01 |
| VAV1     | 1.22 (0.84, 1.77) | 2.95E-01 |
| ECI2     | 1.03 (0.98, 1.08) | 2.96E-01 |
| INSR     | 1.15 (0.89, 1.48) | 2.96E-01 |
| PDLIM4   | 0.94 (0.84, 1.06) | 2.96E-01 |
| SAA2     | 1.03 (0.98, 1.08) | 2.96E-01 |
| A4GALT   | 0.88 (0.70, 1.11) | 2.97E-01 |
| GAA      | 1.03 (0.97, 1.10) | 2.97E-01 |
| SPOCK2   | 0.95 (0.86, 1.05) | 2.97E-01 |
| ASL      | 1.09 (0.93, 1.27) | 2.98E-01 |
| PCDH9    | 1.06 (0.95, 1.18) | 2.98E-01 |
| PSAT1    | 0.92 (0.78, 1.08) | 2.98E-01 |
| QSOX2    | 0.97 (0.91, 1.03) | 2.99E-01 |
| EFEMP1   | 0.91 (0.77, 1.08) | 3.02E-01 |
| EPB41    | 1.17 (0.87, 1.57) | 3.02E-01 |
| TAGLN2   | 0.90 (0.73, 1.10) | 3.02E-01 |
| VOPP1    | 1.13 (0.90, 1.41) | 3.02E-01 |
| LEFTY2   | 1.06 (0.95, 1.18) | 3.03E-01 |
| IFIT3    | 0.88 (0.68, 1.13) | 3.05E-01 |
| CFH      | 1.05 (0.96, 1.15) | 3.06E-01 |
| NOG      | 1.03 (0.97, 1.10) | 3.06E-01 |
| SLITRK1  | 0.85 (0.62, 1.16) | 3.06E-01 |

|           |                   |          |
|-----------|-------------------|----------|
| CHL1      | 1.04 (0.96, 1.14) | 3.12E-01 |
| HRSP12    | 1.07 (0.94, 1.23) | 3.12E-01 |
| IGFBP4    | 1.18 (0.86, 1.62) | 3.12E-01 |
| IGLON5    | 1.08 (0.93, 1.27) | 3.12E-01 |
| TNFAIP6   | 0.98 (0.95, 1.02) | 3.12E-01 |
| SEPSECS   | 0.87 (0.67, 1.13) | 3.13E-01 |
| APOL3     | 0.99 (0.96, 1.01) | 3.17E-01 |
| CELA2A    | 0.89 (0.70, 1.12) | 3.17E-01 |
| CHRD      | 1.18 (0.86, 1.62) | 3.17E-01 |
| DAPK2     | 1.04 (0.97, 1.11) | 3.17E-01 |
| SIRPA     | 1.01 (0.99, 1.02) | 3.17E-01 |
| C1orf198  | 0.92 (0.78, 1.09) | 3.21E-01 |
| MMP7      | 0.93 (0.80, 1.08) | 3.21E-01 |
| LMAN2L    | 1.08 (0.93, 1.27) | 3.22E-01 |
| IGFLR1    | 1.02 (0.98, 1.07) | 3.24E-01 |
| CST1      | 1.02 (0.98, 1.06) | 3.26E-01 |
| CST2      | 1.02 (0.98, 1.06) | 3.26E-01 |
| SCUBE3    | 1.05 (0.95, 1.16) | 3.28E-01 |
| CLN5      | 0.91 (0.74, 1.10) | 3.32E-01 |
| RET       | 1.03 (0.97, 1.09) | 3.32E-01 |
| CD36      | 0.94 (0.83, 1.07) | 3.33E-01 |
| GFRAL     | 1.07 (0.93, 1.24) | 3.33E-01 |
| HMHA1     | 0.93 (0.80, 1.08) | 3.33E-01 |
| TDGF1     | 1.07 (0.93, 1.22) | 3.33E-01 |
| CBR3      | 1.04 (0.96, 1.13) | 3.37E-01 |
| SCARA5    | 1.04 (0.96, 1.13) | 3.37E-01 |
| PTGES2    | 0.85 (0.62, 1.18) | 3.38E-01 |
| ASGR1     | 1.12 (0.89, 1.40) | 3.39E-01 |
| CD200     | 1.11 (0.89, 1.39) | 3.41E-01 |
| CPN2      | 0.98 (0.94, 1.02) | 3.41E-01 |
| ANKRD27   | 1.20 (0.82, 1.75) | 3.43E-01 |
| SPINT3    | 1.03 (0.97, 1.10) | 3.43E-01 |
| UBLCP1    | 1.08 (0.92, 1.27) | 3.43E-01 |
| GKN2      | 0.98 (0.93, 1.02) | 3.44E-01 |
| CPM       | 0.90 (0.74, 1.11) | 3.45E-01 |
| S100A2    | 1.10 (0.90, 1.34) | 3.45E-01 |
| AKR7A2    | 1.07 (0.93, 1.22) | 3.46E-01 |
| IL10RB    | 0.88 (0.67, 1.15) | 3.49E-01 |
| FAM177A1  | 1.13 (0.88, 1.45) | 3.52E-01 |
| PLA2G2A   | 1.01 (0.99, 1.04) | 3.52E-01 |
| TNFRSF17  | 0.93 (0.80, 1.08) | 3.52E-01 |
| MRVI1     | 1.09 (0.91, 1.30) | 3.53E-01 |
| ALDH3B1   | 1.07 (0.92, 1.25) | 3.54E-01 |
| LDHB      | 1.12 (0.88, 1.42) | 3.56E-01 |
| RECQL     | 1.10 (0.90, 1.35) | 3.56E-01 |
| COL6A1    | 1.17 (0.84, 1.64) | 3.59E-01 |
| UNC5C     | 0.94 (0.84, 1.07) | 3.59E-01 |
| SPON1     | 0.97 (0.91, 1.04) | 3.60E-01 |
| CTSZ      | 0.89 (0.69, 1.14) | 3.61E-01 |
| CLSTN2    | 0.96 (0.88, 1.05) | 3.62E-01 |
| SERPINB13 | 0.94 (0.82, 1.08) | 3.62E-01 |
| GNPTG     | 1.03 (0.96, 1.11) | 3.63E-01 |
| FAM213A   | 0.91 (0.73, 1.12) | 3.64E-01 |
| IGLL1     | 0.98 (0.93, 1.03) | 3.64E-01 |

|           |                   |          |
|-----------|-------------------|----------|
| MANEA     | 0.97 (0.90, 1.04) | 3.64E-01 |
| AMIGO2    | 0.91 (0.73, 1.12) | 3.65E-01 |
| KDR       | 0.97 (0.92, 1.03) | 3.65E-01 |
| ARFIP1    | 1.04 (0.96, 1.13) | 3.66E-01 |
| FAM172A   | 1.17 (0.83, 1.66) | 3.66E-01 |
| ADAMTSL2  | 0.93 (0.80, 1.09) | 3.67E-01 |
| AOC1      | 1.01 (0.99, 1.03) | 3.67E-01 |
| HRASLS2   | 0.83 (0.55, 1.24) | 3.67E-01 |
| TF        | 0.94 (0.82, 1.08) | 3.69E-01 |
| FCGR2B    | 0.98 (0.95, 1.02) | 3.70E-01 |
| CLMP      | 1.05 (0.95, 1.15) | 3.71E-01 |
| CTSS      | 1.03 (0.97, 1.08) | 3.71E-01 |
| PTGFRN    | 0.99 (0.96, 1.01) | 3.72E-01 |
| ADAMTS5   | 0.98 (0.93, 1.03) | 3.73E-01 |
| PTGR1     | 1.11 (0.88, 1.40) | 3.73E-01 |
| GLRX      | 0.88 (0.66, 1.17) | 3.74E-01 |
| CCL14     | 0.98 (0.95, 1.02) | 3.75E-01 |
| PEAR1     | 0.96 (0.86, 1.06) | 3.75E-01 |
| SERPINA3  | 0.89 (0.70, 1.15) | 3.76E-01 |
| SERPINA5  | 1.04 (0.96, 1.12) | 3.76E-01 |
| NHEJ1     | 1.10 (0.89, 1.38) | 3.78E-01 |
| NID1      | 0.93 (0.80, 1.09) | 3.79E-01 |
| SERPINA11 | 1.04 (0.96, 1.13) | 3.79E-01 |
| CXCL6     | 0.99 (0.96, 1.02) | 3.80E-01 |
| FAM3D     | 1.03 (0.97, 1.09) | 3.81E-01 |
| CTSV      | 1.06 (0.93, 1.20) | 3.82E-01 |
| RMDN1     | 1.06 (0.93, 1.20) | 3.82E-01 |
| B3GALTL   | 1.04 (0.96, 1.12) | 3.83E-01 |
| PSMD9     | 1.07 (0.92, 1.25) | 3.83E-01 |
| APOBEC3G  | 1.07 (0.91, 1.26) | 3.85E-01 |
| CHST11    | 0.94 (0.83, 1.08) | 3.86E-01 |
| CPZ       | 0.89 (0.67, 1.17) | 3.86E-01 |
| PSMB4     | 0.98 (0.95, 1.02) | 3.86E-01 |
| GZMB      | 1.11 (0.88, 1.39) | 3.87E-01 |
| IGFBP1    | 1.11 (0.88, 1.41) | 3.87E-01 |
| NQO1      | 0.99 (0.96, 1.02) | 3.88E-01 |
| MAGI2     | 0.96 (0.87, 1.05) | 3.89E-01 |
| NTN1      | 0.97 (0.92, 1.03) | 3.89E-01 |
| EPHA1     | 0.99 (0.97, 1.01) | 3.90E-01 |
| RCN1      | 0.89 (0.69, 1.16) | 3.90E-01 |
| XRCC4     | 0.92 (0.77, 1.11) | 3.90E-01 |
| CMPK1     | 1.12 (0.87, 1.44) | 3.91E-01 |
| IGFALS    | 1.06 (0.93, 1.22) | 3.91E-01 |
| TIMD4     | 0.97 (0.89, 1.05) | 3.92E-01 |
| LRP4      | 0.98 (0.94, 1.03) | 3.94E-01 |
| CAMP      | 0.90 (0.70, 1.15) | 3.95E-01 |
| IL2RB     | 0.92 (0.77, 1.11) | 3.95E-01 |
| FOLR2     | 0.90 (0.70, 1.15) | 3.97E-01 |
| CCL11     | 0.93 (0.80, 1.09) | 3.98E-01 |
| BIN1      | 1.06 (0.92, 1.23) | 3.99E-01 |
| ENTPD6    | 0.93 (0.79, 1.10) | 3.99E-01 |
| PREP      | 0.95 (0.84, 1.07) | 3.99E-01 |
| ADH1C     | 0.94 (0.82, 1.08) | 4.01E-01 |
| CDH17     | 0.97 (0.90, 1.04) | 4.01E-01 |

|          |                   |          |
|----------|-------------------|----------|
| FH       | 1.06 (0.92, 1.23) | 4.01E-01 |
| HSPG2    | 1.03 (0.96, 1.12) | 4.01E-01 |
| S100A4   | 0.92 (0.76, 1.12) | 4.04E-01 |
| SERPINE1 | 0.87 (0.64, 1.20) | 4.05E-01 |
| AHSG     | 1.03 (0.97, 1.09) | 4.06E-01 |
| CTSB     | 0.99 (0.95, 1.02) | 4.06E-01 |
| LRP11    | 1.01 (0.98, 1.05) | 4.08E-01 |
| REG4     | 0.93 (0.78, 1.11) | 4.09E-01 |
| AFM      | 1.05 (0.94, 1.16) | 4.10E-01 |
| NFASC    | 0.95 (0.83, 1.08) | 4.10E-01 |
| TIMP2    | 1.13 (0.84, 1.51) | 4.10E-01 |
| TREM1    | 0.97 (0.91, 1.04) | 4.10E-01 |
| CR1      | 0.96 (0.86, 1.06) | 4.11E-01 |
| SUMO3    | 1.18 (0.80, 1.73) | 4.11E-01 |
| ST8SIA6  | 1.21 (0.77, 1.89) | 4.13E-01 |
| SCUBE1   | 1.09 (0.88, 1.35) | 4.15E-01 |
| MMP8     | 0.92 (0.76, 1.12) | 4.16E-01 |
| GP6      | 0.97 (0.89, 1.05) | 4.17E-01 |
| ST3GAL1  | 0.96 (0.87, 1.06) | 4.18E-01 |
| DKK1     | 1.13 (0.84, 1.52) | 4.20E-01 |
| S100A6   | 0.92 (0.75, 1.13) | 4.20E-01 |
| NT5DC3   | 0.96 (0.86, 1.07) | 4.24E-01 |
| CNTFR    | 0.96 (0.88, 1.06) | 4.26E-01 |
| PRDX1    | 1.09 (0.88, 1.35) | 4.26E-01 |
| ITIH4    | 1.06 (0.91, 1.24) | 4.27E-01 |
| RFK      | 0.87 (0.63, 1.22) | 4.27E-01 |
| CXCL5    | 1.07 (0.91, 1.26) | 4.29E-01 |
| GLO1     | 0.93 (0.79, 1.11) | 4.29E-01 |
| HS6ST1   | 0.95 (0.84, 1.08) | 4.30E-01 |
| SERPINH1 | 1.06 (0.91, 1.24) | 4.31E-01 |
| COMP     | 1.06 (0.92, 1.21) | 4.34E-01 |
| CXCL12   | 1.14 (0.82, 1.59) | 4.34E-01 |
| DHX58    | 1.14 (0.83, 1.57) | 4.34E-01 |
| HGFAC    | 1.03 (0.96, 1.11) | 4.35E-01 |
| S100A16  | 0.95 (0.84, 1.08) | 4.35E-01 |
| SELPLG   | 0.97 (0.90, 1.05) | 4.36E-01 |
| SHH      | 1.09 (0.88, 1.34) | 4.36E-01 |
| LGALS4   | 0.86 (0.60, 1.25) | 4.37E-01 |
| TNFRSF21 | 1.08 (0.90, 1.29) | 4.37E-01 |
| REG3G    | 0.98 (0.91, 1.04) | 4.38E-01 |
| PGM1     | 0.93 (0.77, 1.12) | 4.39E-01 |
| PPID     | 0.97 (0.89, 1.05) | 4.40E-01 |
| DTYMK    | 0.87 (0.62, 1.23) | 4.44E-01 |
| TSSC4    | 1.15 (0.80, 1.66) | 4.44E-01 |
| TNFSF15  | 0.86 (0.58, 1.27) | 4.45E-01 |
| TIMP3    | 0.99 (0.96, 1.02) | 4.46E-01 |
| PCBD1    | 0.95 (0.82, 1.09) | 4.47E-01 |
| APLP2    | 0.94 (0.80, 1.10) | 4.50E-01 |
| SFRP1    | 1.05 (0.93, 1.17) | 4.50E-01 |
| CRP      | 0.93 (0.77, 1.12) | 4.52E-01 |
| TNFRSF19 | 1.14 (0.81, 1.62) | 4.52E-01 |
| KLK3     | 0.86 (0.58, 1.27) | 4.53E-01 |
| SORD     | 1.04 (0.94, 1.14) | 4.53E-01 |
| CA13     | 1.02 (0.96, 1.09) | 4.54E-01 |

|           |                   |          |
|-----------|-------------------|----------|
| CRISPLD2  | 1.03 (0.95, 1.12) | 4.54E-01 |
| CDKN1B    | 1.10 (0.86, 1.42) | 4.55E-01 |
| DECR2     | 1.03 (0.95, 1.12) | 4.55E-01 |
| RPS6KA1   | 1.07 (0.89, 1.29) | 4.56E-01 |
| CHGA      | 0.97 (0.89, 1.05) | 4.58E-01 |
| ENGASE    | 1.02 (0.97, 1.06) | 4.61E-01 |
| MXRA7     | 1.03 (0.96, 1.10) | 4.61E-01 |
| FCGR2A    | 0.99 (0.98, 1.01) | 4.62E-01 |
| FKBP1B    | 0.97 (0.88, 1.06) | 4.63E-01 |
| NELL1     | 1.01 (0.98, 1.06) | 4.63E-01 |
| PDXK      | 0.95 (0.82, 1.10) | 4.63E-01 |
| PROS1     | 0.87 (0.61, 1.25) | 4.64E-01 |
| MXRA8     | 1.08 (0.87, 1.34) | 4.66E-01 |
| PF4V1     | 0.98 (0.91, 1.04) | 4.66E-01 |
| TGFBR3    | 1.09 (0.86, 1.39) | 4.66E-01 |
| LEPR      | 1.01 (0.99, 1.03) | 4.67E-01 |
| SARS2     | 1.07 (0.89, 1.27) | 4.67E-01 |
| TGM3      | 1.02 (0.96, 1.09) | 4.67E-01 |
| THBS4     | 1.03 (0.95, 1.13) | 4.67E-01 |
| LCP1      | 0.94 (0.81, 1.10) | 4.68E-01 |
| MSMP      | 0.89 (0.65, 1.22) | 4.68E-01 |
| PCOLCE    | 0.96 (0.85, 1.08) | 4.68E-01 |
| USP8      | 0.89 (0.64, 1.23) | 4.70E-01 |
| MDGA1     | 1.01 (0.99, 1.02) | 4.71E-01 |
| SFRP4     | 1.04 (0.94, 1.15) | 4.71E-01 |
| CHST12    | 0.96 (0.85, 1.08) | 4.72E-01 |
| ITPKA     | 1.10 (0.84, 1.44) | 4.72E-01 |
| VEGFC     | 1.05 (0.91, 1.22) | 4.73E-01 |
| IVD       | 1.06 (0.90, 1.26) | 4.74E-01 |
| NTRK2     | 0.91 (0.69, 1.18) | 4.74E-01 |
| JAG1      | 1.11 (0.84, 1.45) | 4.75E-01 |
| TNFSF13B  | 0.91 (0.70, 1.18) | 4.75E-01 |
| IGF1R     | 1.12 (0.82, 1.52) | 4.76E-01 |
| LINGO1    | 0.89 (0.65, 1.22) | 4.77E-01 |
| PKDCC     | 0.88 (0.61, 1.26) | 4.77E-01 |
| MGP       | 0.97 (0.90, 1.05) | 4.80E-01 |
| SPHK1     | 1.13 (0.81, 1.57) | 4.80E-01 |
| IL17RA    | 1.01 (0.98, 1.05) | 4.81E-01 |
| ANG       | 1.01 (0.97, 1.06) | 4.82E-01 |
| DBI       | 1.10 (0.84, 1.46) | 4.84E-01 |
| SPOCK3    | 0.93 (0.77, 1.13) | 4.84E-01 |
| CD55      | 0.98 (0.93, 1.03) | 4.85E-01 |
| GCA       | 0.97 (0.90, 1.05) | 4.85E-01 |
| SERPINA10 | 0.99 (0.96, 1.02) | 4.86E-01 |
| CD300A    | 0.99 (0.96, 1.02) | 4.87E-01 |
| MYBPC1    | 1.09 (0.86, 1.37) | 4.87E-01 |
| UROS      | 1.04 (0.92, 1.18) | 4.87E-01 |
| VTA1      | 1.14 (0.79, 1.66) | 4.87E-01 |
| LGALS3BP  | 0.96 (0.85, 1.08) | 4.88E-01 |
| FCN1      | 0.98 (0.91, 1.05) | 4.89E-01 |
| MPPED2    | 1.05 (0.91, 1.23) | 4.90E-01 |
| SFTPD     | 1.01 (0.98, 1.05) | 4.90E-01 |
| BMP7      | 1.14 (0.78, 1.66) | 4.92E-01 |
| PDGFRA    | 1.08 (0.87, 1.32) | 4.93E-01 |



|          |                   |          |
|----------|-------------------|----------|
| REN      | 0.89 (0.64, 1.24) | 4.93E-01 |
| F2       | 0.94 (0.78, 1.13) | 4.94E-01 |
| GFRA2    | 0.98 (0.92, 1.04) | 4.96E-01 |
| MGAT1    | 1.15 (0.77, 1.71) | 4.96E-01 |
| PROK2    | 0.99 (0.95, 1.02) | 4.96E-01 |
| PLD3     | 1.15 (0.77, 1.70) | 4.97E-01 |
| SMOC1    | 1.04 (0.92, 1.19) | 4.98E-01 |
| PDCD1LG2 | 0.98 (0.92, 1.04) | 4.99E-01 |
| UAP1     | 0.88 (0.61, 1.27) | 4.99E-01 |
| CHI3L1   | 1.01 (0.99, 1.03) | 5.01E-01 |
| KRT1     | 0.91 (0.70, 1.19) | 5.01E-01 |
| KRT5     | 0.95 (0.83, 1.09) | 5.01E-01 |
| STARD5   | 0.98 (0.91, 1.05) | 5.02E-01 |
| NCAM1    | 0.97 (0.90, 1.05) | 5.03E-01 |
| PYGL     | 1.06 (0.90, 1.24) | 5.05E-01 |
| DPEP2    | 1.04 (0.92, 1.17) | 5.07E-01 |
| TESC     | 1.01 (0.98, 1.05) | 5.07E-01 |
| UBASH3B  | 1.06 (0.90, 1.24) | 5.07E-01 |
| ADIPOQ   | 1.03 (0.94, 1.13) | 5.09E-01 |
| CTRB2    | 1.01 (0.98, 1.04) | 5.09E-01 |
| GCLM     | 1.08 (0.85, 1.37) | 5.09E-01 |
| GLB1     | 1.14 (0.77, 1.67) | 5.09E-01 |
| MYZAP    | 0.91 (0.68, 1.21) | 5.09E-01 |
| LYPD3    | 1.06 (0.89, 1.25) | 5.10E-01 |
| SNX1     | 1.06 (0.89, 1.27) | 5.10E-01 |
| MATN2    | 1.06 (0.90, 1.24) | 5.11E-01 |
| ZYX      | 0.92 (0.71, 1.19) | 5.11E-01 |
| CD300C   | 1.03 (0.95, 1.11) | 5.13E-01 |
| APCS     | 0.98 (0.90, 1.05) | 5.17E-01 |
| IFNAR1   | 1.01 (0.97, 1.05) | 5.17E-01 |
| SERPINA9 | 1.04 (0.93, 1.16) | 5.19E-01 |
| KIAA1161 | 1.05 (0.90, 1.24) | 5.20E-01 |
| F13B     | 0.97 (0.87, 1.07) | 5.21E-01 |
| PKP2     | 1.08 (0.86, 1.35) | 5.21E-01 |
| TPST2    | 0.96 (0.85, 1.09) | 5.21E-01 |
| EGFR     | 1.05 (0.90, 1.22) | 5.23E-01 |
| CETN3    | 1.09 (0.83, 1.44) | 5.26E-01 |
| FCN2     | 1.01 (0.97, 1.06) | 5.28E-01 |
| TXNDC15  | 1.02 (0.96, 1.07) | 5.28E-01 |
| CAT      | 1.03 (0.93, 1.15) | 5.31E-01 |
| ID1I     | 1.15 (0.74, 1.78) | 5.31E-01 |
| FETUB    | 1.03 (0.94, 1.13) | 5.32E-01 |
| REG1A    | 0.98 (0.91, 1.05) | 5.33E-01 |
| SMOC2    | 1.02 (0.95, 1.10) | 5.33E-01 |
| C1QTNF5  | 0.97 (0.87, 1.07) | 5.35E-01 |
| NTF3     | 0.94 (0.77, 1.15) | 5.35E-01 |
| MAN1A2   | 0.97 (0.89, 1.07) | 5.37E-01 |
| TCL1A    | 1.03 (0.93, 1.14) | 5.37E-01 |
| CCT5     | 1.17 (0.71, 1.91) | 5.40E-01 |
| CD4      | 1.13 (0.77, 1.64) | 5.40E-01 |
| CFHR4    | 0.98 (0.94, 1.03) | 5.42E-01 |
| LY75     | 1.02 (0.96, 1.07) | 5.42E-01 |
| CYB5A    | 1.08 (0.84, 1.38) | 5.43E-01 |
| CCL5     | 0.97 (0.88, 1.07) | 5.44E-01 |

|          |                   |          |
|----------|-------------------|----------|
| ERAP1    | 0.92 (0.71, 1.19) | 5.46E-01 |
| XXYLT1   | 0.97 (0.88, 1.07) | 5.46E-01 |
| FJX1     | 1.03 (0.94, 1.12) | 5.47E-01 |
| BTNL8    | 0.95 (0.79, 1.13) | 5.49E-01 |
| CREG1    | 1.04 (0.92, 1.18) | 5.49E-01 |
| HDHD3    | 1.03 (0.93, 1.15) | 5.50E-01 |
| WFIKKN2  | 0.99 (0.95, 1.03) | 5.50E-01 |
| CD7      | 0.97 (0.87, 1.08) | 5.51E-01 |
| FLRT2    | 0.97 (0.88, 1.07) | 5.51E-01 |
| PLEKHA1  | 0.98 (0.92, 1.05) | 5.51E-01 |
| CNP      | 1.08 (0.83, 1.40) | 5.52E-01 |
| COLEC11  | 0.99 (0.97, 1.02) | 5.53E-01 |
| TRIM3    | 0.95 (0.78, 1.14) | 5.53E-01 |
| KIRREL2  | 1.07 (0.85, 1.36) | 5.59E-01 |
| ROBO1    | 1.06 (0.88, 1.28) | 5.60E-01 |
| DSG2     | 1.03 (0.94, 1.12) | 5.62E-01 |
| VWA2     | 1.05 (0.89, 1.23) | 5.62E-01 |
| PTPRS    | 0.94 (0.77, 1.15) | 5.63E-01 |
| SH3BGRL2 | 0.95 (0.79, 1.14) | 5.63E-01 |
| GALNT16  | 1.03 (0.92, 1.16) | 5.64E-01 |
| PF4      | 0.93 (0.73, 1.19) | 5.64E-01 |
| KLK14    | 0.96 (0.84, 1.10) | 5.65E-01 |
| CRISP2   | 1.01 (0.97, 1.05) | 5.66E-01 |
| CST5     | 1.01 (0.97, 1.07) | 5.66E-01 |
| HAPLN1   | 1.05 (0.88, 1.26) | 5.66E-01 |
| PLXNA1   | 0.98 (0.90, 1.06) | 5.68E-01 |
| RNASE3   | 1.02 (0.95, 1.09) | 5.68E-01 |
| EMILIN3  | 0.98 (0.90, 1.06) | 5.69E-01 |
| MCEMP1   | 1.12 (0.75, 1.68) | 5.69E-01 |
| TNFSF14  | 1.11 (0.78, 1.56) | 5.69E-01 |
| LRRTM4   | 1.12 (0.75, 1.68) | 5.70E-01 |
| CRYGD    | 0.95 (0.81, 1.12) | 5.72E-01 |
| GREM2    | 0.88 (0.58, 1.35) | 5.72E-01 |
| MGAT2    | 0.96 (0.83, 1.11) | 5.73E-01 |
| CCL21    | 0.96 (0.81, 1.12) | 5.78E-01 |
| TP53I3   | 1.01 (0.97, 1.06) | 5.78E-01 |
| YWHAB    | 1.03 (0.92, 1.16) | 5.78E-01 |
| RNASE6   | 0.91 (0.64, 1.28) | 5.79E-01 |
| EBI3     | 1.00 (0.98, 1.01) | 5.82E-01 |
| PPT1     | 0.96 (0.84, 1.10) | 5.82E-01 |
| PPCS     | 1.06 (0.87, 1.29) | 5.83E-01 |
| NAGPA    | 1.01 (0.96, 1.07) | 5.84E-01 |
| APOE     | 1.03 (0.93, 1.15) | 5.85E-01 |
| CTSD     | 1.03 (0.93, 1.14) | 5.85E-01 |
| PSG5     | 1.06 (0.87, 1.28) | 5.85E-01 |
| C3       | 1.07 (0.84, 1.36) | 5.86E-01 |
| MANSC4   | 0.99 (0.95, 1.03) | 5.88E-01 |
| SPINK4   | 1.02 (0.94, 1.12) | 5.89E-01 |
| SIGLEC9  | 1.00 (0.98, 1.01) | 5.90E-01 |
| METTL24  | 1.06 (0.87, 1.29) | 5.91E-01 |
| IFNGR1   | 1.08 (0.82, 1.42) | 5.92E-01 |
| EFNB2    | 1.09 (0.79, 1.52) | 5.93E-01 |
| THG1L    | 0.99 (0.93, 1.04) | 5.93E-01 |
| IGDCC4   | 1.03 (0.94, 1.12) | 5.94E-01 |

|            |                   |          |
|------------|-------------------|----------|
| CBLN1      | 0.98 (0.90, 1.06) | 5.95E-01 |
| FLT4       | 1.04 (0.90, 1.20) | 5.95E-01 |
| IGFBP5     | 1.11 (0.76, 1.61) | 5.95E-01 |
| PNLIPRP2   | 1.01 (0.99, 1.02) | 5.95E-01 |
| SECTM1     | 1.03 (0.93, 1.14) | 5.95E-01 |
| CPNE1      | 0.99 (0.96, 1.02) | 5.97E-01 |
| CSGALNACT2 | 0.95 (0.80, 1.14) | 5.98E-01 |
| PCNP       | 1.06 (0.84, 1.34) | 5.99E-01 |
| SEPW1      | 1.05 (0.88, 1.24) | 5.99E-01 |
| TMEM132A   | 0.98 (0.92, 1.05) | 5.99E-01 |
| ATXN3      | 1.02 (0.94, 1.11) | 6.00E-01 |
| NT5C3A     | 1.08 (0.82, 1.41) | 6.01E-01 |
| ECHS1      | 1.10 (0.76, 1.60) | 6.02E-01 |
| TMEM132D   | 0.98 (0.91, 1.06) | 6.02E-01 |
| MTRF1L     | 0.97 (0.85, 1.10) | 6.03E-01 |
| ELANE      | 1.02 (0.95, 1.08) | 6.05E-01 |
| CA3        | 0.97 (0.85, 1.10) | 6.06E-01 |
| TNFRSF11B  | 0.94 (0.76, 1.17) | 6.06E-01 |
| SIAE       | 0.95 (0.78, 1.16) | 6.07E-01 |
| GHR        | 0.97 (0.87, 1.08) | 6.09E-01 |
| PSAPL1     | 0.98 (0.93, 1.04) | 6.09E-01 |
| SULT1A3    | 0.96 (0.80, 1.14) | 6.09E-01 |
| CHST15     | 1.04 (0.89, 1.23) | 6.10E-01 |
| CRAT       | 0.94 (0.75, 1.19) | 6.10E-01 |
| IL5RA      | 0.99 (0.94, 1.04) | 6.10E-01 |
| SELL       | 0.98 (0.91, 1.06) | 6.10E-01 |
| COL10A1    | 0.98 (0.89, 1.07) | 6.11E-01 |
| PLXNA4     | 0.95 (0.76, 1.17) | 6.11E-01 |
| SAA4       | 1.01 (0.97, 1.05) | 6.12E-01 |
| GAS1       | 1.07 (0.82, 1.40) | 6.13E-01 |
| SDSL       | 1.02 (0.95, 1.08) | 6.13E-01 |
| ASPN       | 0.99 (0.94, 1.04) | 6.14E-01 |
| LOXL3      | 0.95 (0.77, 1.17) | 6.14E-01 |
| SVEP1      | 1.02 (0.95, 1.10) | 6.14E-01 |
| KLK7       | 1.02 (0.96, 1.08) | 6.15E-01 |
| HDHD2      | 0.95 (0.76, 1.17) | 6.16E-01 |
| EPHB4      | 1.04 (0.88, 1.23) | 6.17E-01 |
| LARGE      | 0.96 (0.80, 1.14) | 6.17E-01 |
| TEK        | 0.97 (0.85, 1.10) | 6.18E-01 |
| GM2A       | 1.02 (0.94, 1.10) | 6.20E-01 |
| SLITRK5    | 1.04 (0.89, 1.21) | 6.20E-01 |
| TXNL4B     | 1.04 (0.90, 1.20) | 6.23E-01 |
| FHIT       | 0.92 (0.68, 1.27) | 6.24E-01 |
| NOTCH1     | 1.06 (0.85, 1.32) | 6.24E-01 |
| CRYBB1     | 0.97 (0.87, 1.08) | 6.25E-01 |
| NUDT5      | 1.07 (0.82, 1.39) | 6.25E-01 |
| EIF1AD     | 1.02 (0.93, 1.13) | 6.26E-01 |
| PILRA      | 1.00 (0.98, 1.01) | 6.27E-01 |
| C7         | 1.01 (0.98, 1.03) | 6.28E-01 |
| FER        | 0.94 (0.74, 1.20) | 6.28E-01 |
| NDRG3      | 1.08 (0.79, 1.48) | 6.29E-01 |
| IFI16      | 1.06 (0.83, 1.35) | 6.30E-01 |
| SOD3       | 0.98 (0.91, 1.06) | 6.30E-01 |
| CD8A       | 0.98 (0.92, 1.05) | 6.31E-01 |

|          |                   |          |
|----------|-------------------|----------|
| KYNU     | 0.99 (0.94, 1.04) | 6.31E-01 |
| PNKP     | 0.96 (0.81, 1.14) | 6.32E-01 |
| SPP1     | 0.95 (0.77, 1.17) | 6.32E-01 |
| IL20RA   | 0.92 (0.64, 1.31) | 6.33E-01 |
| LEAP2    | 1.02 (0.95, 1.08) | 6.33E-01 |
| NQO2     | 0.98 (0.90, 1.06) | 6.33E-01 |
| TIGIT    | 0.94 (0.72, 1.22) | 6.33E-01 |
| POLI     | 0.94 (0.74, 1.20) | 6.36E-01 |
| ADH5     | 0.97 (0.83, 1.12) | 6.38E-01 |
| APOA4    | 0.94 (0.71, 1.24) | 6.38E-01 |
| TNFAIP8  | 1.03 (0.91, 1.16) | 6.38E-01 |
| NT5E     | 0.98 (0.89, 1.07) | 6.39E-01 |
| NTM      | 0.99 (0.94, 1.04) | 6.41E-01 |
| CBL      | 1.06 (0.83, 1.36) | 6.42E-01 |
| CCL7     | 1.01 (0.97, 1.05) | 6.42E-01 |
| CCL8     | 0.99 (0.95, 1.03) | 6.42E-01 |
| SIGLEC1  | 1.10 (0.74, 1.62) | 6.42E-01 |
| KCNAB2   | 0.94 (0.72, 1.23) | 6.43E-01 |
| CTSO     | 0.97 (0.84, 1.11) | 6.44E-01 |
| UCMA     | 0.98 (0.90, 1.07) | 6.44E-01 |
| HIBCH    | 0.99 (0.93, 1.05) | 6.46E-01 |
| SEMA7A   | 0.94 (0.73, 1.22) | 6.46E-01 |
| PENK     | 1.01 (0.97, 1.05) | 6.47E-01 |
| NPL      | 1.02 (0.93, 1.13) | 6.49E-01 |
| ACP5     | 1.02 (0.93, 1.11) | 6.50E-01 |
| LUM      | 1.04 (0.88, 1.22) | 6.50E-01 |
| LILRA4   | 1.03 (0.90, 1.17) | 6.51E-01 |
| SPINK1   | 1.04 (0.87, 1.24) | 6.53E-01 |
| SYK      | 0.95 (0.76, 1.19) | 6.53E-01 |
| ARRB1    | 1.06 (0.81, 1.40) | 6.55E-01 |
| PI3      | 1.02 (0.95, 1.09) | 6.55E-01 |
| TALDO1   | 0.93 (0.68, 1.28) | 6.56E-01 |
| DNAJB14  | 0.93 (0.66, 1.30) | 6.58E-01 |
| CD33     | 1.00 (0.99, 1.02) | 6.60E-01 |
| PGLYRP1  | 1.03 (0.92, 1.14) | 6.60E-01 |
| CILP2    | 1.08 (0.77, 1.50) | 6.62E-01 |
| GGH      | 0.99 (0.94, 1.04) | 6.63E-01 |
| APMAP    | 1.05 (0.84, 1.30) | 6.64E-01 |
| BRSK2    | 0.97 (0.86, 1.10) | 6.64E-01 |
| CNTN5    | 1.03 (0.89, 1.20) | 6.64E-01 |
| PCDH10   | 0.96 (0.81, 1.14) | 6.65E-01 |
| RNPEP    | 0.98 (0.92, 1.06) | 6.66E-01 |
| GPNMB    | 1.02 (0.93, 1.11) | 6.68E-01 |
| ADAMTS13 | 1.01 (0.97, 1.05) | 6.69E-01 |
| PDCD5    | 0.98 (0.88, 1.08) | 6.69E-01 |
| RTP4     | 1.01 (0.96, 1.07) | 6.69E-01 |
| TMEM132C | 1.02 (0.95, 1.09) | 6.70E-01 |
| WISP1    | 0.98 (0.91, 1.06) | 6.72E-01 |
| ADH6     | 0.97 (0.84, 1.12) | 6.73E-01 |
| PTGDS    | 0.97 (0.85, 1.11) | 6.74E-01 |
| DARS     | 0.96 (0.78, 1.17) | 6.75E-01 |
| DCLK1    | 1.02 (0.93, 1.13) | 6.76E-01 |
| NPTXR    | 0.99 (0.95, 1.03) | 6.78E-01 |
| RELT     | 1.08 (0.76, 1.52) | 6.78E-01 |

|          |                   |          |
|----------|-------------------|----------|
| RGS18    | 0.94 (0.69, 1.27) | 6.78E-01 |
| LILRB1   | 1.00 (0.98, 1.03) | 6.80E-01 |
| RIPK2    | 1.08 (0.76, 1.53) | 6.80E-01 |
| SHANK3   | 0.94 (0.68, 1.28) | 6.80E-01 |
| FGFR3    | 1.03 (0.91, 1.15) | 6.81E-01 |
| HTATIP2  | 0.99 (0.96, 1.03) | 6.81E-01 |
| CMBL     | 1.02 (0.92, 1.14) | 6.82E-01 |
| LILRB3   | 0.99 (0.97, 1.02) | 6.82E-01 |
| HDGFRP3  | 1.04 (0.86, 1.27) | 6.83E-01 |
| MST1     | 1.00 (0.99, 1.02) | 6.83E-01 |
| PDIA5    | 1.01 (0.98, 1.04) | 6.83E-01 |
| NCAM2    | 0.99 (0.95, 1.04) | 6.85E-01 |
| PDLIM1   | 1.05 (0.81, 1.36) | 6.87E-01 |
| CRABP2   | 1.04 (0.86, 1.25) | 6.88E-01 |
| GSN      | 0.97 (0.83, 1.13) | 6.88E-01 |
| REG1B    | 0.98 (0.91, 1.07) | 6.88E-01 |
| SIGLEC5  | 0.99 (0.92, 1.06) | 6.88E-01 |
| STAMBPL1 | 1.05 (0.84, 1.31) | 6.89E-01 |
| GMPR2    | 0.99 (0.92, 1.06) | 6.91E-01 |
| HEBP1    | 1.02 (0.92, 1.13) | 6.91E-01 |
| ULK3     | 0.96 (0.77, 1.19) | 6.94E-01 |
| ACAT2    | 0.99 (0.92, 1.06) | 6.95E-01 |
| COL1A1   | 0.93 (0.64, 1.35) | 6.96E-01 |
| GXYLT1   | 0.96 (0.80, 1.16) | 6.97E-01 |
| GRAMD1C  | 1.02 (0.91, 1.14) | 6.98E-01 |
| HADH     | 0.94 (0.70, 1.27) | 6.98E-01 |
| MFAP4    | 0.98 (0.89, 1.08) | 6.99E-01 |
| TFF3     | 0.93 (0.63, 1.37) | 7.01E-01 |
| HEXB     | 1.02 (0.94, 1.10) | 7.03E-01 |
| CHIT1    | 0.99 (0.95, 1.03) | 7.04E-01 |
| FCER2    | 0.99 (0.94, 1.04) | 7.05E-01 |
| ALPPL2   | 0.93 (0.63, 1.36) | 7.06E-01 |
| CRADD    | 0.94 (0.67, 1.32) | 7.06E-01 |
| IL1RAP   | 1.00 (0.98, 1.02) | 7.06E-01 |
| NNMT     | 0.93 (0.66, 1.33) | 7.06E-01 |
| HDGF     | 0.96 (0.76, 1.21) | 7.08E-01 |
| DCI      | 0.97 (0.85, 1.12) | 7.10E-01 |
| SPON2    | 0.96 (0.79, 1.17) | 7.10E-01 |
| AP1G2    | 1.04 (0.83, 1.32) | 7.13E-01 |
| CPQ      | 1.03 (0.86, 1.24) | 7.16E-01 |
| ACAN     | 1.03 (0.88, 1.21) | 7.17E-01 |
| KRT20    | 0.94 (0.67, 1.32) | 7.17E-01 |
| ART3     | 1.04 (0.83, 1.31) | 7.18E-01 |
| CROT     | 0.99 (0.94, 1.05) | 7.18E-01 |
| DPT      | 1.01 (0.96, 1.07) | 7.18E-01 |
| FBP2     | 1.03 (0.88, 1.21) | 7.19E-01 |
| IGF2R    | 1.01 (0.96, 1.06) | 7.19E-01 |
| IL27RA   | 1.00 (0.97, 1.02) | 7.20E-01 |
| PROC     | 1.02 (0.90, 1.17) | 7.20E-01 |
| PLA2G12B | 0.96 (0.76, 1.21) | 7.21E-01 |
| TTL      | 0.92 (0.59, 1.44) | 7.21E-01 |
| C1QC     | 1.01 (0.97, 1.05) | 7.24E-01 |
| NTRK3    | 1.02 (0.91, 1.15) | 7.25E-01 |
| GNMT     | 1.02 (0.93, 1.10) | 7.26E-01 |

|            |                   |          |
|------------|-------------------|----------|
| LYVE1      | 1.01 (0.93, 1.10) | 7.26E-01 |
| HPGDS      | 0.99 (0.94, 1.04) | 7.27E-01 |
| CRLF1      | 0.99 (0.91, 1.07) | 7.28E-01 |
| NRP1       | 1.01 (0.95, 1.08) | 7.28E-01 |
| GSTA1      | 1.01 (0.95, 1.07) | 7.29E-01 |
| PPP1R1A    | 1.06 (0.75, 1.51) | 7.29E-01 |
| SRI        | 1.03 (0.87, 1.22) | 7.29E-01 |
| CXCL16     | 0.98 (0.86, 1.11) | 7.30E-01 |
| CD46       | 1.01 (0.94, 1.10) | 7.31E-01 |
| PRSS2      | 1.02 (0.93, 1.12) | 7.31E-01 |
| SF3B4      | 0.92 (0.57, 1.48) | 7.32E-01 |
| AIF1L      | 1.01 (0.97, 1.05) | 7.34E-01 |
| COL15A1    | 0.98 (0.85, 1.12) | 7.34E-01 |
| S100A12    | 1.02 (0.92, 1.12) | 7.34E-01 |
| REG3A      | 1.04 (0.82, 1.33) | 7.35E-01 |
| C8G        | 0.99 (0.95, 1.03) | 7.36E-01 |
| CEL        | 0.95 (0.73, 1.25) | 7.36E-01 |
| FAM20B     | 0.96 (0.78, 1.19) | 7.36E-01 |
| JUND       | 0.95 (0.69, 1.30) | 7.36E-01 |
| ST6GALNAC6 | 1.06 (0.77, 1.45) | 7.36E-01 |
| UGDH       | 1.01 (0.95, 1.08) | 7.36E-01 |
| RARRES1    | 1.01 (0.94, 1.10) | 7.39E-01 |
| STAT6      | 1.04 (0.84, 1.28) | 7.39E-01 |
| WWOX       | 1.05 (0.80, 1.37) | 7.41E-01 |
| ACADSB     | 1.03 (0.84, 1.27) | 7.42E-01 |
| ACAP2      | 0.94 (0.66, 1.35) | 7.43E-01 |
| GSR        | 0.97 (0.78, 1.19) | 7.44E-01 |
| IGFBP3     | 1.02 (0.89, 1.17) | 7.44E-01 |
| KNG1       | 0.99 (0.92, 1.06) | 7.44E-01 |
| PDCD6      | 1.07 (0.72, 1.57) | 7.44E-01 |
| SIGLEC7    | 0.99 (0.91, 1.07) | 7.47E-01 |
| IL15RA     | 1.01 (0.96, 1.06) | 7.49E-01 |
| SNX8       | 1.03 (0.85, 1.26) | 7.50E-01 |
| CCM2       | 0.95 (0.69, 1.31) | 7.52E-01 |
| DNAJB4     | 0.98 (0.87, 1.11) | 7.52E-01 |
| SCARF1     | 0.99 (0.95, 1.04) | 7.52E-01 |
| SLAMF6     | 0.98 (0.88, 1.10) | 7.52E-01 |
| FAM3B      | 1.05 (0.77, 1.44) | 7.53E-01 |
| STX8       | 1.05 (0.78, 1.42) | 7.53E-01 |
| NRP2       | 1.02 (0.89, 1.17) | 7.55E-01 |
| STX7       | 1.02 (0.88, 1.20) | 7.60E-01 |
| ESD        | 1.02 (0.92, 1.12) | 7.62E-01 |
| TNFAIP3    | 0.98 (0.86, 1.12) | 7.64E-01 |
| LCN1       | 1.05 (0.77, 1.44) | 7.65E-01 |
| RGMA       | 1.04 (0.79, 1.38) | 7.66E-01 |
| SCO2       | 1.03 (0.85, 1.24) | 7.66E-01 |
| NT5C3L     | 1.00 (0.96, 1.03) | 7.70E-01 |
| TRIL       | 0.97 (0.78, 1.20) | 7.70E-01 |
| VIM        | 1.04 (0.81, 1.32) | 7.70E-01 |
| BTC        | 0.98 (0.86, 1.11) | 7.74E-01 |
| ENPP2      | 0.97 (0.82, 1.16) | 7.75E-01 |
| GPX7       | 0.99 (0.96, 1.03) | 7.75E-01 |
| TFF1       | 1.01 (0.95, 1.07) | 7.75E-01 |
| PLG        | 0.99 (0.92, 1.07) | 7.76E-01 |

|          |                   |          |
|----------|-------------------|----------|
| S100A7   | 1.00 (0.98, 1.03) | 7.76E-01 |
| COLEC12  | 0.98 (0.85, 1.13) | 7.77E-01 |
| F5       | 1.01 (0.93, 1.09) | 7.78E-01 |
| MFAP2    | 1.02 (0.88, 1.19) | 7.78E-01 |
| RETN     | 1.01 (0.94, 1.09) | 7.78E-01 |
| CCDC80   | 0.95 (0.65, 1.38) | 7.79E-01 |
| NUDT2    | 1.01 (0.94, 1.09) | 7.81E-01 |
| PRCP     | 0.98 (0.87, 1.11) | 7.81E-01 |
| B4GALT7  | 1.06 (0.70, 1.60) | 7.82E-01 |
| AP2A2    | 1.05 (0.76, 1.44) | 7.83E-01 |
| CHI3L2   | 0.96 (0.69, 1.32) | 7.83E-01 |
| NTNG1    | 1.00 (0.96, 1.03) | 7.84E-01 |
| SEMA3C   | 1.03 (0.86, 1.23) | 7.84E-01 |
| ANXA2    | 1.01 (0.97, 1.04) | 7.85E-01 |
| CCL15    | 1.06 (0.71, 1.58) | 7.86E-01 |
| NMT2     | 0.96 (0.73, 1.28) | 7.87E-01 |
| B4GALT6  | 1.01 (0.96, 1.05) | 7.88E-01 |
| RTN4IP1  | 1.04 (0.76, 1.43) | 7.89E-01 |
| PCSK2    | 1.03 (0.82, 1.30) | 7.90E-01 |
| FGR      | 0.98 (0.83, 1.15) | 7.91E-01 |
| CD14     | 0.99 (0.91, 1.08) | 7.92E-01 |
| PKLR     | 0.95 (0.64, 1.41) | 7.92E-01 |
| LGALS2   | 0.99 (0.90, 1.08) | 7.93E-01 |
| PCSK7    | 1.00 (0.98, 1.03) | 7.93E-01 |
| CD200R1  | 0.98 (0.83, 1.16) | 7.95E-01 |
| FGL1     | 1.01 (0.97, 1.04) | 7.95E-01 |
| PGLYRP2  | 0.99 (0.93, 1.06) | 7.96E-01 |
| TINAGL1  | 0.97 (0.76, 1.23) | 7.97E-01 |
| TGM4     | 1.05 (0.73, 1.52) | 7.98E-01 |
| BMPER    | 1.03 (0.83, 1.27) | 7.99E-01 |
| ADAMTSL1 | 0.99 (0.92, 1.07) | 8.00E-01 |
| FRZB     | 0.98 (0.85, 1.14) | 8.01E-01 |
| PLCG1    | 1.03 (0.79, 1.35) | 8.01E-01 |
| TMEM132B | 0.98 (0.87, 1.12) | 8.01E-01 |
| EFNA3    | 0.93 (0.55, 1.60) | 8.02E-01 |
| GNPDA1   | 1.03 (0.80, 1.34) | 8.02E-01 |
| MET      | 0.98 (0.85, 1.13) | 8.03E-01 |
| CFHR1    | 0.98 (0.83, 1.15) | 8.04E-01 |
| CNPY3    | 0.98 (0.84, 1.15) | 8.04E-01 |
| ELMO1    | 1.04 (0.74, 1.47) | 8.05E-01 |
| CD209    | 1.01 (0.95, 1.07) | 8.08E-01 |
| MAPK8    | 1.04 (0.75, 1.44) | 8.08E-01 |
| UST      | 1.06 (0.65, 1.72) | 8.08E-01 |
| LGALS3   | 1.01 (0.95, 1.07) | 8.09E-01 |
| PPA2     | 0.97 (0.78, 1.21) | 8.09E-01 |
| DNAJB6   | 1.05 (0.72, 1.53) | 8.11E-01 |
| FIS1     | 1.02 (0.89, 1.17) | 8.13E-01 |
| ITIH2    | 1.00 (0.96, 1.03) | 8.13E-01 |
| RNASE4   | 0.99 (0.93, 1.06) | 8.14E-01 |
| LYZ      | 1.00 (0.96, 1.03) | 8.15E-01 |
| PCOLCE2  | 0.99 (0.94, 1.05) | 8.15E-01 |
| RRM1     | 1.04 (0.76, 1.41) | 8.15E-01 |
| DDOST    | 0.96 (0.65, 1.40) | 8.16E-01 |
| KLK8     | 1.03 (0.78, 1.38) | 8.16E-01 |

|          |                   |          |
|----------|-------------------|----------|
| KLRB1    | 0.99 (0.91, 1.07) | 8.17E-01 |
| SERPINE2 | 0.99 (0.95, 1.04) | 8.17E-01 |
| BTD      | 0.99 (0.88, 1.10) | 8.19E-01 |
| NPTX1    | 1.01 (0.94, 1.08) | 8.19E-01 |
| ALDH2    | 1.03 (0.81, 1.31) | 8.20E-01 |
| GLCE     | 1.00 (0.96, 1.03) | 8.20E-01 |
| QPCT     | 0.96 (0.66, 1.38) | 8.20E-01 |
| GSS      | 0.99 (0.91, 1.08) | 8.21E-01 |
| STIM1    | 1.02 (0.85, 1.24) | 8.21E-01 |
| CHKB     | 1.03 (0.81, 1.31) | 8.22E-01 |
| GP1BA    | 0.98 (0.86, 1.13) | 8.22E-01 |
| CDNF     | 1.01 (0.94, 1.08) | 8.23E-01 |
| IL1R2    | 0.99 (0.95, 1.04) | 8.23E-01 |
| ENPP5    | 1.00 (0.97, 1.02) | 8.24E-01 |
| ANXA4    | 0.99 (0.92, 1.07) | 8.27E-01 |
| COL6A3   | 0.97 (0.73, 1.29) | 8.28E-01 |
| BOC      | 1.01 (0.93, 1.09) | 8.29E-01 |
| HMOX1    | 1.05 (0.68, 1.61) | 8.31E-01 |
| FCRL4    | 1.00 (0.98, 1.02) | 8.32E-01 |
| PSG7     | 0.98 (0.78, 1.22) | 8.32E-01 |
| NPDC1    | 0.96 (0.67, 1.38) | 8.33E-01 |
| SORCS1   | 0.97 (0.71, 1.32) | 8.33E-01 |
| LAG3     | 0.98 (0.84, 1.15) | 8.35E-01 |
| SERPINA4 | 1.01 (0.96, 1.05) | 8.36E-01 |
| ANXA1    | 1.01 (0.88, 1.17) | 8.38E-01 |
| UNC5B    | 0.98 (0.85, 1.14) | 8.38E-01 |
| CALCB    | 1.01 (0.93, 1.10) | 8.40E-01 |
| OLFML3   | 1.02 (0.82, 1.28) | 8.40E-01 |
| PCSK1    | 1.00 (0.97, 1.02) | 8.40E-01 |
| PTPN9    | 0.97 (0.73, 1.30) | 8.40E-01 |
| DCTD     | 1.02 (0.81, 1.30) | 8.43E-01 |
| ASPH     | 1.02 (0.82, 1.27) | 8.44E-01 |
| FCRLB    | 0.99 (0.93, 1.07) | 8.46E-01 |
| CCL4L1   | 0.98 (0.80, 1.21) | 8.47E-01 |
| LPO      | 1.01 (0.94, 1.08) | 8.48E-01 |
| LTF      | 1.02 (0.86, 1.21) | 8.48E-01 |
| ALAD     | 0.99 (0.90, 1.10) | 8.49E-01 |
| MMP1     | 1.00 (0.95, 1.04) | 8.50E-01 |
| CBLN4    | 0.98 (0.81, 1.19) | 8.51E-01 |
| CD5L     | 1.01 (0.94, 1.07) | 8.51E-01 |
| PHPT1    | 1.01 (0.91, 1.12) | 8.54E-01 |
| OGN      | 1.00 (0.95, 1.05) | 8.56E-01 |
| CRTAC1   | 1.01 (0.95, 1.06) | 8.57E-01 |
| PDGFD    | 1.01 (0.95, 1.06) | 8.57E-01 |
| CNTN4    | 0.99 (0.94, 1.06) | 8.58E-01 |
| CA11     | 1.01 (0.89, 1.14) | 8.61E-01 |
| TBCE     | 1.02 (0.84, 1.23) | 8.62E-01 |
| ABO      | 1.01 (0.94, 1.08) | 8.64E-01 |
| NMRAL1   | 1.00 (0.96, 1.03) | 8.64E-01 |
| ENG      | 0.99 (0.87, 1.13) | 8.65E-01 |
| ZG16B    | 1.01 (0.90, 1.13) | 8.65E-01 |
| APOL1    | 0.99 (0.94, 1.06) | 8.66E-01 |
| FAIM3    | 1.02 (0.84, 1.23) | 8.66E-01 |
| PLXND1   | 1.01 (0.86, 1.20) | 8.66E-01 |



|          |                   |          |
|----------|-------------------|----------|
| SERPING1 | 1.00 (0.97, 1.03) | 8.66E-01 |
| CPB2     | 1.00 (0.96, 1.04) | 8.70E-01 |
| FN1      | 1.01 (0.90, 1.14) | 8.70E-01 |
| TXNDC5   | 0.99 (0.84, 1.16) | 8.70E-01 |
| ACP6     | 1.00 (0.96, 1.03) | 8.71E-01 |
| ARSB     | 0.99 (0.86, 1.14) | 8.73E-01 |
| FCRL1    | 1.00 (0.95, 1.05) | 8.75E-01 |
| HTN3     | 1.03 (0.74, 1.42) | 8.75E-01 |
| SMAP1    | 1.01 (0.94, 1.07) | 8.75E-01 |
| PLCG2    | 1.01 (0.87, 1.18) | 8.76E-01 |
| SEMA6A   | 1.02 (0.82, 1.26) | 8.76E-01 |
| ROR1     | 0.99 (0.92, 1.07) | 8.80E-01 |
| PLA2G7   | 0.99 (0.83, 1.18) | 8.81E-01 |
| EPHA10   | 1.02 (0.78, 1.33) | 8.82E-01 |
| LRRC32   | 0.98 (0.71, 1.35) | 8.83E-01 |
| SIGLEC14 | 1.00 (0.96, 1.04) | 8.83E-01 |
| ATP1B2   | 1.01 (0.90, 1.14) | 8.84E-01 |
| NMB      | 0.99 (0.86, 1.14) | 8.84E-01 |
| RFESD    | 1.03 (0.72, 1.45) | 8.88E-01 |
| COL3A1   | 0.98 (0.73, 1.32) | 8.89E-01 |
| DNER     | 1.01 (0.91, 1.11) | 8.89E-01 |
| CEACAM8  | 1.02 (0.77, 1.35) | 8.90E-01 |
| IL1R1    | 0.99 (0.89, 1.10) | 8.90E-01 |
| SWAP70   | 1.00 (0.96, 1.05) | 8.90E-01 |
| CA10     | 1.01 (0.85, 1.20) | 8.91E-01 |
| CR2      | 1.01 (0.89, 1.14) | 8.91E-01 |
| MAPRE2   | 1.01 (0.89, 1.14) | 8.91E-01 |
| MATN4    | 1.01 (0.92, 1.10) | 8.91E-01 |
| APOC1    | 0.98 (0.69, 1.38) | 8.92E-01 |
| LIFR     | 1.00 (0.94, 1.08) | 8.92E-01 |
| SAR1A    | 1.01 (0.89, 1.14) | 8.92E-01 |
| PVRL4    | 0.97 (0.66, 1.43) | 8.93E-01 |
| ASF1A    | 1.02 (0.73, 1.43) | 8.94E-01 |
| WFDC1    | 1.00 (0.95, 1.06) | 8.95E-01 |
| TLL1     | 1.02 (0.74, 1.41) | 8.96E-01 |
| OLFM1    | 0.98 (0.70, 1.36) | 8.98E-01 |
| PTN      | 1.01 (0.91, 1.11) | 8.98E-01 |
| CADM1    | 1.01 (0.87, 1.17) | 9.00E-01 |
| GLTPD2   | 0.99 (0.91, 1.08) | 9.01E-01 |
| TGFBI    | 1.00 (0.96, 1.04) | 9.01E-01 |
| DCTPP1   | 1.02 (0.71, 1.49) | 9.02E-01 |
| SERPINB1 | 1.02 (0.80, 1.29) | 9.03E-01 |
| LRP8     | 1.02 (0.80, 1.29) | 9.04E-01 |
| C5       | 0.99 (0.87, 1.14) | 9.05E-01 |
| CCL17    | 0.99 (0.90, 1.10) | 9.06E-01 |
| TAC1     | 0.99 (0.88, 1.12) | 9.06E-01 |
| TMEM190  | 1.00 (0.98, 1.02) | 9.07E-01 |
| COL6A2   | 1.01 (0.85, 1.20) | 9.08E-01 |
| BPIFA2   | 0.99 (0.78, 1.25) | 9.09E-01 |
| PRSS22   | 1.01 (0.92, 1.09) | 9.09E-01 |
| C1QTNF3  | 1.01 (0.87, 1.17) | 9.14E-01 |
| MTHFSD   | 1.00 (0.94, 1.06) | 9.14E-01 |
| LRPAP1   | 1.01 (0.90, 1.12) | 9.15E-01 |
| ST3GAL6  | 0.99 (0.78, 1.24) | 9.15E-01 |

|          |                   |          |
|----------|-------------------|----------|
| GZMK     | 0.99 (0.87, 1.13) | 9.16E-01 |
| IL18RAP  | 0.99 (0.76, 1.28) | 9.17E-01 |
| PCSK9    | 1.00 (0.93, 1.07) | 9.19E-01 |
| RBP4     | 1.01 (0.79, 1.30) | 9.21E-01 |
| GRAP2    | 0.97 (0.54, 1.76) | 9.23E-01 |
| HYAL1    | 0.99 (0.85, 1.17) | 9.27E-01 |
| RAD23B   | 1.02 (0.69, 1.51) | 9.27E-01 |
| CTRB1    | 1.00 (0.94, 1.06) | 9.28E-01 |
| KLB      | 0.99 (0.86, 1.15) | 9.29E-01 |
| NAGLU    | 1.00 (0.97, 1.03) | 9.30E-01 |
| DYNLL2   | 0.99 (0.69, 1.40) | 9.34E-01 |
| RNASE2   | 1.01 (0.88, 1.15) | 9.34E-01 |
| HNRNPAB  | 0.99 (0.76, 1.28) | 9.35E-01 |
| LSAMP    | 1.01 (0.89, 1.13) | 9.35E-01 |
| APOC3    | 0.99 (0.87, 1.14) | 9.36E-01 |
| CCDC126  | 1.00 (0.93, 1.08) | 9.36E-01 |
| KLK11    | 1.00 (0.98, 1.02) | 9.39E-01 |
| KPNA6    | 0.99 (0.74, 1.31) | 9.39E-01 |
| MANF     | 0.99 (0.74, 1.32) | 9.40E-01 |
| ANGPTL1  | 0.99 (0.68, 1.44) | 9.42E-01 |
| EPHB2    | 0.99 (0.72, 1.37) | 9.44E-01 |
| PPIL1    | 1.00 (0.96, 1.04) | 9.44E-01 |
| SEZ6L    | 0.99 (0.81, 1.22) | 9.44E-01 |
| BST1     | 1.00 (0.98, 1.02) | 9.45E-01 |
| CACNA2D3 | 1.00 (0.90, 1.11) | 9.45E-01 |
| ICAM5    | 1.00 (0.97, 1.03) | 9.47E-01 |
| ACE      | 1.00 (0.97, 1.03) | 9.49E-01 |
| VWC2     | 1.00 (0.89, 1.12) | 9.49E-01 |
| CCL25    | 1.00 (0.97, 1.03) | 9.50E-01 |
| B3GALT6  | 0.99 (0.69, 1.42) | 9.51E-01 |
| LDLRAP1  | 1.01 (0.81, 1.25) | 9.51E-01 |
| IL22     | 1.01 (0.66, 1.55) | 9.52E-01 |
| MAX      | 1.00 (0.89, 1.11) | 9.52E-01 |
| TFPI2    | 0.99 (0.63, 1.53) | 9.52E-01 |
| FUT10    | 1.00 (0.95, 1.05) | 9.54E-01 |
| RAB1A    | 0.99 (0.71, 1.39) | 9.54E-01 |
| SPINT1   | 1.00 (0.87, 1.16) | 9.54E-01 |
| FLRT3    | 0.99 (0.80, 1.24) | 9.55E-01 |
| WFDC2    | 1.01 (0.76, 1.34) | 9.55E-01 |
| FMOD     | 1.00 (0.87, 1.16) | 9.56E-01 |
| RTN4R    | 1.00 (0.90, 1.11) | 9.57E-01 |
| APOA5    | 1.00 (0.97, 1.03) | 9.58E-01 |
| TMEM9    | 1.01 (0.77, 1.32) | 9.58E-01 |
| ACADVL   | 1.01 (0.69, 1.48) | 9.59E-01 |
| HAVCR2   | 1.00 (0.96, 1.03) | 9.59E-01 |
| PGLYRP3  | 1.01 (0.66, 1.55) | 9.59E-01 |
| SHMT1    | 1.00 (0.97, 1.03) | 9.59E-01 |
| STAT3    | 1.00 (0.88, 1.14) | 9.60E-01 |
| ALDH1A1  | 1.01 (0.81, 1.24) | 9.63E-01 |
| PDE5A    | 1.00 (0.86, 1.17) | 9.66E-01 |
| CHST9    | 1.00 (0.93, 1.08) | 9.68E-01 |
| SBDS     | 1.00 (0.82, 1.21) | 9.74E-01 |
| B3GNT2   | 1.00 (0.89, 1.13) | 9.75E-01 |
| SIGLEC12 | 1.00 (0.98, 1.02) | 9.75E-01 |

|           |                   |          |
|-----------|-------------------|----------|
| CCL22     | 1.00 (0.88, 1.15) | 9.76E-01 |
| ROR2      | 1.00 (0.88, 1.14) | 9.76E-01 |
| IGFBP2    | 1.01 (0.72, 1.41) | 9.77E-01 |
| ASRGL1    | 1.00 (0.90, 1.11) | 9.78E-01 |
| DTD2      | 1.00 (0.84, 1.19) | 9.78E-01 |
| GFER      | 1.00 (0.74, 1.37) | 9.78E-01 |
| MTHFD2    | 0.99 (0.59, 1.67) | 9.81E-01 |
| ANGPT2    | 1.00 (0.86, 1.15) | 9.83E-01 |
| DNAJB1    | 1.00 (0.68, 1.49) | 9.84E-01 |
| PRSS57    | 1.00 (0.96, 1.04) | 9.85E-01 |
| WISP2     | 1.00 (0.92, 1.09) | 9.85E-01 |
| NPNT      | 1.00 (0.90, 1.12) | 9.86E-01 |
| ENTHD2    | 1.00 (0.79, 1.27) | 9.88E-01 |
| VWA1      | 1.00 (0.74, 1.36) | 9.91E-01 |
| FGF23     | 1.00 (0.66, 1.51) | 9.92E-01 |
| MCF2L     | 1.00 (0.92, 1.09) | 9.92E-01 |
| SIRPG     | 1.00 (0.88, 1.14) | 9.92E-01 |
| HSPA13    | 1.00 (0.83, 1.21) | 9.93E-01 |
| SERPINA12 | 1.00 (0.93, 1.08) | 9.96E-01 |
| FSTL4     | 1.00 (0.76, 1.32) | 1.00E+00 |
| GPC1      | 1.00 (0.96, 1.04) | 1.00E+00 |
| IL6ST     | 1.00 (0.92, 1.08) | 1.00E+00 |
| LY9       | 1.00 (0.94, 1.06) | 1.00E+00 |
| NPPA      | 1.00 (0.76, 1.31) | 1.00E+00 |
| POFUT1    | 1.00 (0.91, 1.09) | 1.00E+00 |

---
